# Supplementary material for: Synthesis of polysubstituted tetrahydrofurans via visible light-induced De Mayo acetalization of benzoylacetones
Source: Royal Society of Chemistry journal article supplement (doi:10.1039/d4cc05797j), 2024-12-17
Supplement: d4cc05797j1.pdf [file d4cc05797j1.pdf]

## Supporting Information

# Synthesis of Polysubstituted Tetrahydrofurans via Visible Light-Induced De Mayo Acetalization of Benzoylacetones

Ranadheer Reddy Indurmuddam,<sup>a</sup> Bor-Cherng Hong,<sup>\*a</sup> and Su-Ying Chien<sup>b</sup>

<sup>a</sup>Department of Chemistry and Biochemistry, National Chung Cheng University, Chia-Yi, 621, Taiwan, R.O.C., and

<sup>b</sup>Instrumentation Center, National Taiwan University, Taipei, 106, Taiwan, R.O.C.

E-mail: chebch@ccu.edu.tw

### SUPPORTING INFORMATION:

Contents:

- (1) General procedure and equipment information.....Page S1–S2
- (2) Table S1.....Page S3
- (3) Experimental procedures and characterization data for compounds.....Page S4–S28
- (4) UV-Vis, Emission spectrum, Stern-Volmer quenching, control experiments.....Page S29–S31
- (5) Spectra for compounds.....Page S32–S154

### General Procedure.

All solvents were reagent grade. Catalyst thioxanthone was purchased from Aldrich Chemicals, Tokyo Chemical Industry Co., Ltd., Alfa Aesar, etc. Reactions were normally carried out under a nitrogen atmosphere in glassware or vial. Merck silica gel 60 (particle size 0.04-0.063 mm) was employed for flash chromatography. <sup>1</sup>H NMR spectra were obtained in CDCl<sub>3</sub> unless otherwise noted at 400 MHz (Bruker DPX-400, Bruker Ascend<sup>TM</sup> 400) or 500 MHz (Varian-Unity INOVA-500). <sup>13</sup>C NMR spectra were obtained at 125 MHz or 100 MHz. The melting point was recorded on a melting point apparatus (MPA100–Automated melting point system, Stanford Research Systems, Inc.) and is uncorrected. IR spectra were recorded on Bruker Alpha FT-IR spectrometer. ESI ionization time-of-flight mass (ESI-TOF HRMS) spectral data were collected on a JMS-T100LP 4G(JEOL) mass spectrometer equipped with the ESI source, detecting positive and negative ions. Typical measurement conditions are as follows: needle voltage: 2000 kV, orifice 1 voltage: 30 V, ring lens voltage: 10 V, spray temperature: 250 °C. EI-TOF mass spectral data were collected on a JMS-T200GC AccuTOF GCx-plus (JEOL) mass spectrometer. EI ionization time-of-flight mass (EI-TOF HRMS) spectral data were collected on a JMS-T200GC AccuTOF GCx-plus (JEOL) mass spectrometer equipped with the EI ion source and DIP sampling device. Typical measurement conditions are as follows: ionizing voltage: 70 eV, ionizing current: 300 μA, ion chamber temperature: 250 °C, DIP temperature: 50 to 200 °C in 2 minutes. The single-crystal X-ray diffraction data of crystals were individually collected in-house on a Bruker D8 Venture diffractometer equipped with a Cu-target (Kα = 1.54178 Å) or Mo-target (Kα = 0.71073 Å) microfocus X-ray generators and a

PHOTON-II CMOS detector. The temperature was adjusted with a nitrogen flow (Oxford Cryosystems). After collection, the data were integrated with the Bruker SAINT software package using a narrow-frame algorithm and were corrected for absorption effects using the Multi-Scan method (SADABS). Then, the molecular structure was solved and refined by the Bruker SHELXTL Software Package and the final anisotropic full-matrix least-squares method was used to refine on F2 with variables parameters to determine crystal structure. UV-Vis was recorded on HITACHI U-3310 Spectrophotometer, Fluorescence was recorded by HITACHI F-7000 Fluorescence Spectrophotometer.

For the UV lamps used in Table 1, entry 30: Regular ultraviolet (UV) blacklight CFL light bulb (365 nm, 40 W, 110 V, 50 Hz).

Violet LED lamps were purchased from <https://honlychem.com>; LED wavelength was measured by StellarNet EPP2000 Spectrometer (StellarNet, Inc.); LED optical power was measured by Optical Power Meter PM100A (thorlabs.com).

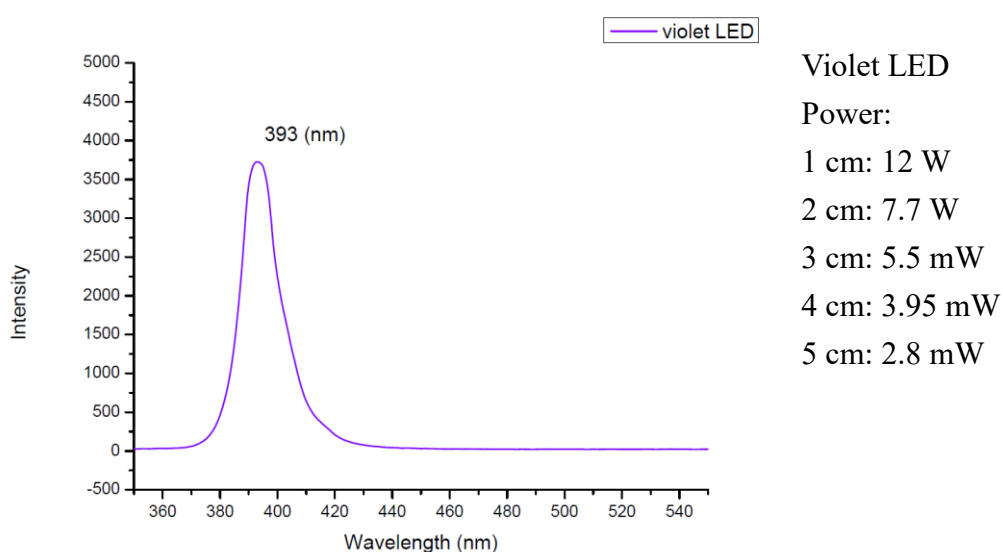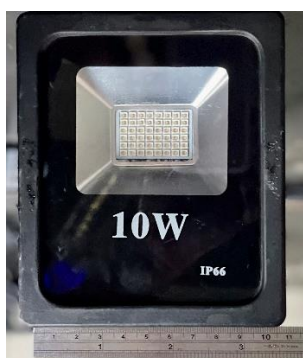

393 nm LED lamp

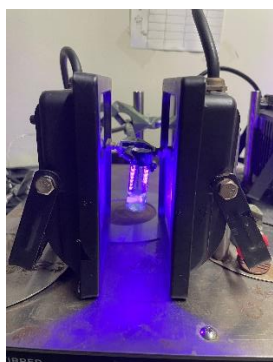

reaction set up

**Table S1.** Screening for the Conversion of **1a** to **2aa**<sup>a</sup>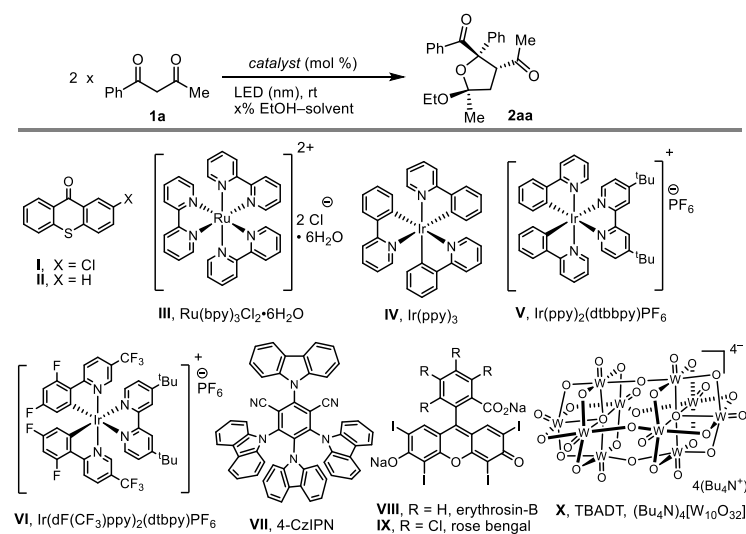

| entry           | catalyst (mol%) | LED light (nm) | solvent                                  | time (h) | yield (%) <sup>b</sup> |
|-----------------|-----------------|----------------|------------------------------------------|----------|------------------------|
| 1               | <b>I</b> (10)   | violet (393)   | CHCl <sub>3</sub> <sup>c</sup>           | 48       | 55 (51)                |
| 2               | <b>I</b> (10)   | violet (393)   | CH <sub>2</sub> Cl <sub>2</sub>          | 48       | 0 <sup>d</sup>         |
| 3               | <b>I</b> (10)   | violet (393)   | EtOH                                     | 72       | nr                     |
| 4               | <b>I</b> (10)   | violet (393)   | 1% EtOH/CH <sub>2</sub> Cl <sub>2</sub>  | 48       | 50                     |
| 5               | <b>I</b> (10)   | violet (393)   | 2% EtOH/CH <sub>2</sub> Cl <sub>2</sub>  | 48       | 85(76) <sup>e</sup>    |
| 6               | <b>I</b> (10)   | violet (393)   | 3% EtOH/CH <sub>2</sub> Cl <sub>2</sub>  | 48       | 71(64)                 |
| 7               | <b>I</b> (10)   | violet (393)   | 4% EtOH/CH <sub>2</sub> Cl <sub>2</sub>  | 48       | 62                     |
| 8               | <b>I</b> (10)   | violet (393)   | 5% EtOH/CH <sub>2</sub> Cl <sub>2</sub>  | 48       | 33                     |
| 9               | <b>I</b> (10)   | violet (393)   | 10% EtOH/CH <sub>2</sub> Cl <sub>2</sub> | 48       | 24                     |
| 10              | <b>I</b> (10)   | violet (393)   | 50% EtOH/CH <sub>2</sub> Cl <sub>2</sub> | 72       | nr                     |
| 11              | <b>I</b> (10)   | violet (393)   | 2% EtOH/CH <sub>3</sub> CN               | 48       | 19                     |
| 12              | <b>I</b> (10)   | violet (393)   | 2% EtOH/THF                              | 48       | nr                     |
| 13              | <b>I</b> (10)   | violet (393)   | 2% EtOH/acetone                          | 48       | 8                      |
| 14              | <b>I</b> (10)   | violet (393)   | 2% EtOH/DMF                              | 48       | nr                     |
| 15              | <b>I</b> (10)   | violet (393)   | 2% EtOH/CDCl <sub>3</sub>                | 48       | 54                     |
| 16 <sup>f</sup> | <b>I</b> (10)   | violet (393)   | 2% EtOH/CH <sub>2</sub> Cl <sub>2</sub>  | 48       | 61                     |
| 17 <sup>g</sup> | <b>I</b> (10)   | violet (393)   | 2% EtOH/CH <sub>2</sub> Cl <sub>2</sub>  | 48       | 58                     |
| 18 <sup>h</sup> | <b>I</b> (10)   | violet (393)   | 2% EtOH/CH <sub>2</sub> Cl <sub>2</sub>  | 48       | 73                     |
| 19              | <b>II</b> (10)  | violet (393)   | 2% EtOH/CH <sub>2</sub> Cl <sub>2</sub>  | 48       | 41                     |
| 20              | <b>III</b> (2)  | blue (450)     | 2% EtOH/CH <sub>2</sub> Cl <sub>2</sub>  | 72       | nr                     |
| 21              | <b>IV</b> (2)   | blue (450)     | 2% EtOH/CH <sub>2</sub> Cl <sub>2</sub>  | 48       | 11                     |
| 22              | <b>V</b> (2)    | blue (450)     | 2% EtOH/CH <sub>2</sub> Cl <sub>2</sub>  | 48       | 20                     |
| 23              | <b>VI</b> (2)   | blue (450)     | 2% EtOH/CH <sub>2</sub> Cl <sub>2</sub>  | 48       | 49                     |
| 24              | <b>VII</b> (2)  | blue (450)     | 2% EtOH/CH <sub>2</sub> Cl <sub>2</sub>  | 48       | 55                     |
| 25              | <b>VIII</b> (2) | green (515)    | 2% EtOH/CH <sub>2</sub> Cl <sub>2</sub>  | 72       | nr                     |
| 26              | <b>IX</b> (2)   | green (515)    | 2% EtOH/CH <sub>2</sub> Cl <sub>2</sub>  | 72       | nr                     |
| 27              | <b>X</b> (5)    | violet (393)   | 2% EtOH/CH <sub>2</sub> Cl <sub>2</sub>  | 72       | nr                     |
| 28              | <b>I</b> (10)   | dark           | 2% EtOH/CH <sub>2</sub> Cl <sub>2</sub>  | 48       | nr                     |
| 29              | -               | violet (393)   | 2% EtOH/CH <sub>2</sub> Cl <sub>2</sub>  | 48       | nr                     |
| 30              | -               | UV (365)       | 2% EtOH/CH <sub>2</sub> Cl <sub>2</sub>  | 48       | nr                     |

<sup>a</sup> Under ambient temperature and LED irradiation, the reaction was conducted in a capped vial containing **1a** (0.1 M) and a catalyst (2–10 mol %) in a solvent. <sup>b</sup> The NMR yield was determined by <sup>1</sup>H NMR spectroscopy analysis using 1,3,5-trimethylbenzene as an internal standard, with the isolated yield of **2aa** provided in parentheses. <sup>c</sup>Commercial chloroform usually contains 0.5–1.0% ethanol as a stabilizer. <sup>d</sup>Complicated mixtures were observed. <sup>e</sup> dr>20:1 <sup>f</sup>A concentrated aqueous HCl solution (3:1 v/v, ~40 equiv of HCl) was added to the reaction mixture. <sup>g</sup> The reaction was carried out in 0.2 M of **1a**. <sup>h</sup>The reaction was carried out in 0.05 M of **1a**. nr = no reaction

### Preparation of **2aa**:

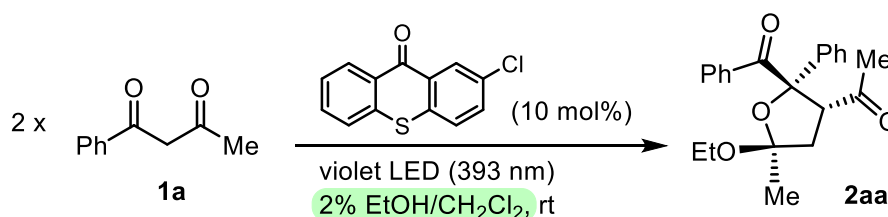

A magnetic stirring bar and 1-phenylbutane-1,3-dione (**1a**, 20 mg, 0.12 mmol)<sup>1</sup> were placed in a 4-mL sample vial, followed by the addition of 2-chloro-9H-thioxanthen-9-one (3.0 mg, 0.01 mmol, 0.1 equiv) in 2% ethanol/CH<sub>2</sub>Cl<sub>2</sub> (1.2 mL). The solution was purged with argon and closed with a screw cap. The solution was stirred and irradiated with the violet LEDs (393 nm, 2 x 10 W) at room temperature for 48 h until the completion of the reaction, monitored by TLC. After the irradiation, the reaction solution was concentrated *in vacuo* to give a residue. The crude product was purified by column chromatography with 5% EtOAc–hexane to afford **2aa** ( $R_f = 0.44$  in 20% EtOAc–hexane; 16.5 mg, 76% yield) as a yellow solid.

Selected data for **2aa**: mp: 98-99 °C; IR (neat): 3064, 2981, 2933, 2886, 1712, 1683, 1592, 1446, 1357, 1314, 1227, 1177, 1106, 1034, 952, 868, 755, 701 cm<sup>-1</sup>; <sup>1</sup>H NMR (500 MHz, CDCl<sub>3</sub>):  $\delta$  7.92 (dd,  $J = 8.5, 1.5$  Hz, 2 H), 7.42 – 7.37 (m, 1 H), 7.31 – 7.19 (m, 7 H), 4.75 (t,  $J = 8.0$  Hz, 1 H), 3.19 (dq,  $J = 8.8, 7.0$  Hz, 1 H), 2.71 (dq,  $J = 8.8, 7.0$  Hz, 1 H), 2.48 (dd,  $J = 13.0, 8.0$  Hz, 1 H), 2.06 (dd,  $J = 13.0, 8.0$  Hz, 1 H), 1.80 (s, 3 H), 1.67 (s, 3 H), 0.58 (t,  $J = 7.0$  Hz, 3 H); <sup>13</sup>C NMR (125 MHz, CDCl<sub>3</sub>):  $\delta$  207.7 (C), 198.6 (C), 137.9 (C), 134.0 (C), 132.6 (CH), 131.1 (two CH), 128.6 (two CH), 128.3 (CH), 127.8 (two CH), 125.4 (two CH), 108.7 (C), 93.5 (C), 57.5 (CH<sub>2</sub>), 57.3 (CH), 41.1 (CH<sub>2</sub>), 31.2 (CH<sub>3</sub>), 21.3 (CH<sub>3</sub>), 14.5 (CH<sub>3</sub>); HRMS (GC-EI-TOF)  $m/z$ : [M]<sup>+</sup> Calcd for C<sub>22</sub>H<sub>24</sub>O<sub>4</sub> 352.1675; found 352.1666.

### Recrystallization of **2aa** was performed as follows:

The compound (**2aa**, ~5 mg) in a screw-capped vial (4 mL vial) was dissolved in CHCl<sub>3</sub> (~0.5 mL) and diluted with *n*-hexane (~2.5 mL). The vial was covered with aluminum foil (having 4-5 holes on it) and placed in another vial (20 mL vial) filled with *n*-hexane (~8 mL). The 20 mL vial was closed gently with a screw cap and stands it for 5 days until complete evaporation of the solvent in the inner vial. The crystals formed were subjected to single-crystal X-ray analysis.

<sup>1</sup> Purchased from Combi-Blocks Inc.

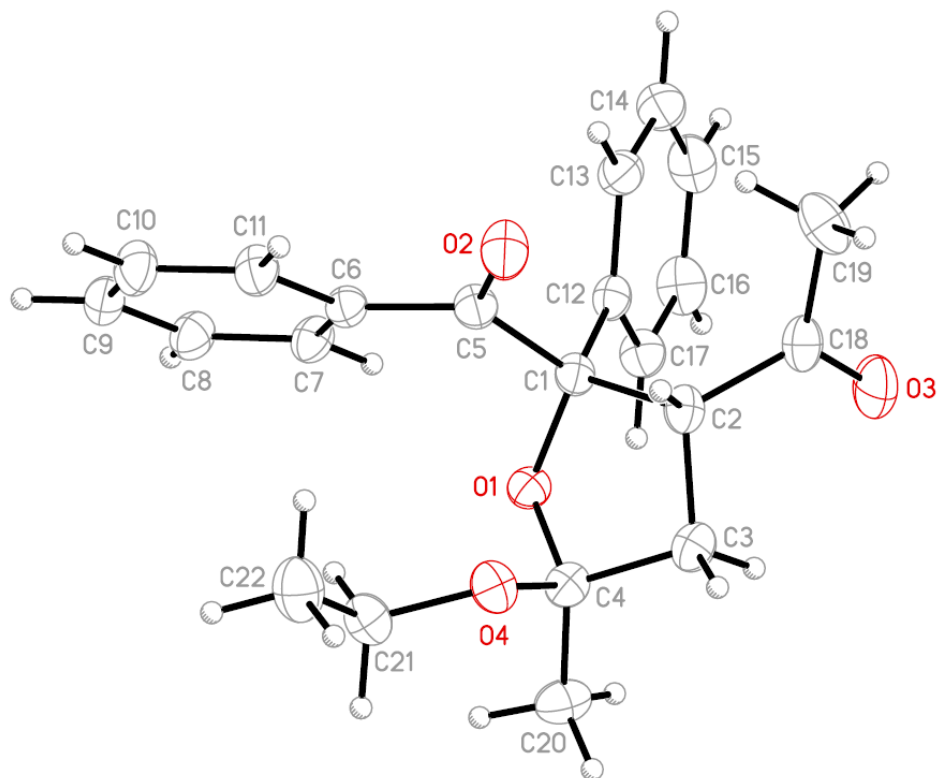

Thermal ellipsoids draw at the 30% probability level

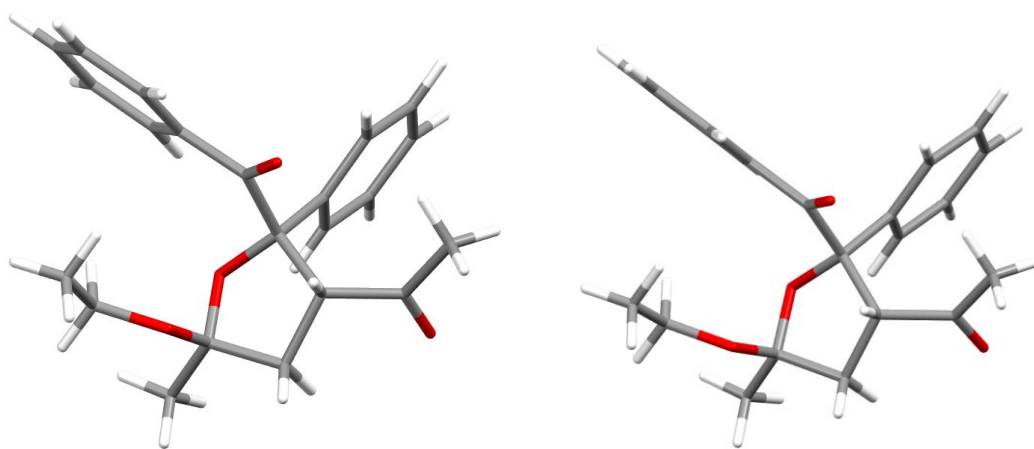

**Figure S1.** ORTEP and Stereo plots for X-ray crystal structures of **2aa** (ic22359).

CCDC 2382209 contains the supplementary crystallographic data for **2aa** (ic22359). These data can be obtained free of charge from the Cambridge Crystallographic Data Centre via [www.ccdc.cam.ac.uk](http://www.ccdc.cam.ac.uk)

**Table S2.** Crystal data and structure refinement for **2aa** (ic22359).

|                                   |                                             |                |
|-----------------------------------|---------------------------------------------|----------------|
| Identification code               | ic22359                                     |                |
| Empirical formula                 | C22 H24 O4                                  |                |
| Formula weight                    | 352.41                                      |                |
| Temperature                       | 200(2) K                                    |                |
| Wavelength                        | 0.71073 Å                                   |                |
| Crystal system                    | Triclinic                                   |                |
| Space group                       | P-1                                         |                |
| Unit cell dimensions              | a = 8.3493(7) Å                             | = 111.527(3)°. |
|                                   | b = 10.3182(8) Å                            | = 96.606(3)°.  |
|                                   | c = 12.4869(10) Å                           | = 104.002(3)°. |
| Volume                            | 945.89(13) Å <sup>3</sup>                   |                |
| Z                                 | 2                                           |                |
| Density (calculated)              | 1.237 Mg/m <sup>3</sup>                     |                |
| Absorption coefficient            | 0.084 mm <sup>-1</sup>                      |                |
| F(000)                            | 376                                         |                |
| Crystal size                      | 0.239 x 0.207 x 0.134 mm <sup>3</sup>       |                |
| Theta range for data collection   | 2.219 to 30.000°.                           |                |
| Index ranges                      | -10<=h<=11, -14<=k<=14, -17<=l<=17          |                |
| Reflections collected             | 19902                                       |                |
| Independent reflections           | 5523 [R(int) = 0.0726]                      |                |
| Completeness to theta = 25.242°   | 99.9 %                                      |                |
| Absorption correction             | Semi-empirical from equivalents             |                |
| Max. and min. transmission        | 0.9602 and 0.7947                           |                |
| Refinement method                 | Full-matrix least-squares on F <sup>2</sup> |                |
| Data / restraints / parameters    | 5523 / 0 / 238                              |                |
| Goodness-of-fit on F <sup>2</sup> | 1.036                                       |                |
| Final R indices [I>2sigma(I)]     | R1 = 0.0657, wR2 = 0.1580                   |                |
| R indices (all data)              | R1 = 0.1118, wR2 = 0.1925                   |                |
| Extinction coefficient            | n/a                                         |                |
| Largest diff. peak and hole       | 0.422 and -0.203 e.Å <sup>-3</sup>          |                |

### Preparation of **2ab**:

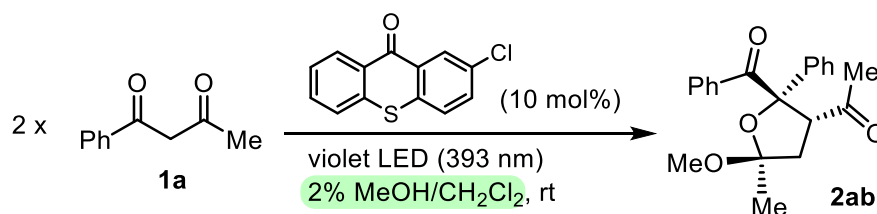

A magnetic stirring bar and 1-phenylbutane-1,3-dione (**1a**, 20 mg, 0.12 mmol)<sup>1</sup> were placed in a 4-mL sample vial, followed by the addition of 2-chloro-9H-thioxanthen-9-one (3.0 mg, 0.01 mmol, 0.1 equiv) in 2% Methanol/CH<sub>2</sub>Cl<sub>2</sub> (1.2 mL). The solution was purged with argon and closed with a screw cap. The solution was stirred and irradiated with the violet LEDs (393 nm, 2 x 10 W) at room temperature for 40 h until the completion of the reaction, monitored by TLC. After the irradiation, the reaction solution was concentrated *in vacuo* to give a residue. The crude product was purified by column chromatography with 5% EtOAc–hexane to afford **2ab** ( $R_f = 0.37$  in 15% EtOAc–hexane; 15.8 mg, 76% yield) as a yellow solid.

Selected data for **2ab**: mp: 121-122 °C; IR (neat): 3062, 2990, 2952, 2831, 1711, 1683, 1592, 1490, 1446, 1355, 1316, 1228, 1178, 1106, 1030, 872, 755, 700 cm<sup>-1</sup>; <sup>1</sup>H NMR (500 MHz, CDCl<sub>3</sub>):  $\delta$  7.87 – 7.83 (m, 2 H), 7.41 – 7.36 (m, 1 H), 7.30 – 7.24 (m, 7 H), 4.72 (t,  $J = 7.9$  Hz, 1 H), 2.56 (s, 3 H), 2.49 (dd,  $J = 13.1, 7.9$  Hz, 1 H), 2.04 (dd,  $J = 13.1, 7.9$  Hz, 1 H), 1.76 (s, 3 H), 1.64 (s, 3 H); <sup>13</sup>C NMR (125 MHz, CDCl<sub>3</sub>):  $\delta$  207.7 (C), 198.9 (C), 137.6 (C), 134.4 (C), 132.4 (CH), 131.0 (two CH), 128.7 (two CH), 128.4 (CH), 127.8 (two CH), 125.5 (two CH), 109.2 (C), 93.7 (C), 57.3 (CH), 49.6 (CH<sub>3</sub>), 41.0 (CH<sub>2</sub>), 31.2 (CH<sub>3</sub>), 20.5 (CH<sub>3</sub>); HRMS (GC-EI-TOF)  $m/z$ : [M]<sup>+</sup> Calcd for C<sub>21</sub>H<sub>22</sub>O<sub>4</sub> 338.1518; found 338.1510.

### Recrystallization of **2ab** was performed as follows:

The compound (**2ab**, ~5 mg) in a screw-capped vial (4 mL vial) was dissolved in CH<sub>2</sub>Cl<sub>2</sub> (~0.5 mL) and diluted with *n*-hexane (~2.5 mL). The vial was covered with aluminum foil (having 4-5 holes on it) and placed in another vial (20 mL vial) filled with *n*-hexane (~8 mL). The 20 mL vial was closed gently with a screw cap and stands it for 5 days until complete evaporation of the solvent in the inner vial. The crystals formed were subjected to single-crystal X-ray analysis.

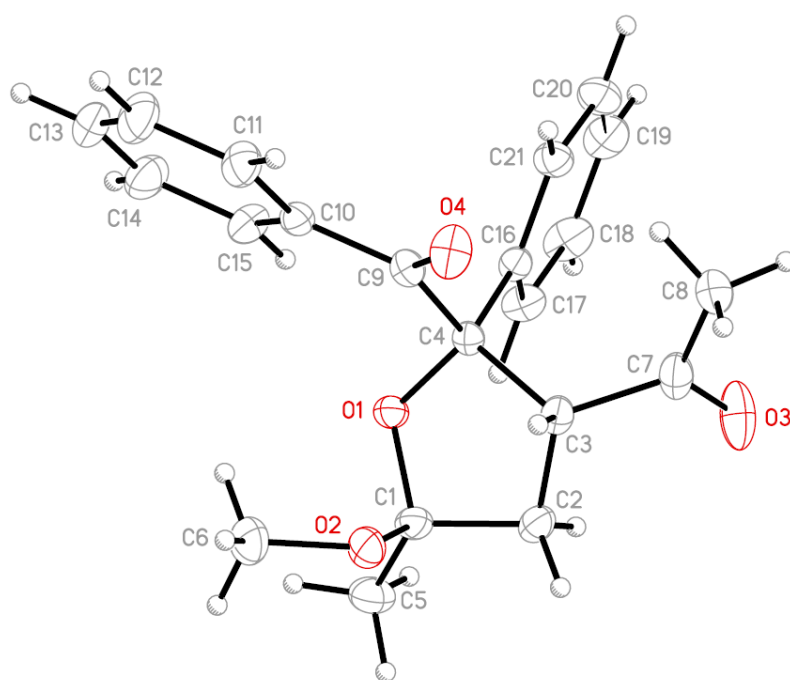

Thermal ellipsoids draw at the 30% probability level

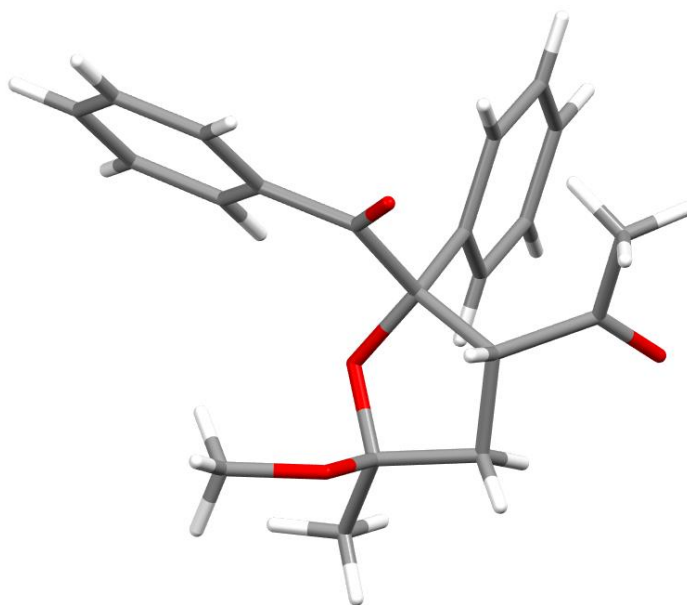

**Figure S2.** ORTEP and Stereo plots for X-ray crystal structures of **2ab** (ic22493).

CCDC 2382210 contains the supplementary crystallographic data for **2ab** (ic22493). These data can be obtained free of charge from the Cambridge Crystallographic Data Centre via [www.ccdc.cam.ac.uk](http://www.ccdc.cam.ac.uk)



**Table S3.** Crystal data and structure refinement for **2ab** (ic22493).

|                                   |                                                |                   |
|-----------------------------------|------------------------------------------------|-------------------|
| Identification code               | ic22493                                        |                   |
| Empirical formula                 | C <sub>21</sub> H <sub>22</sub> O <sub>4</sub> |                   |
| Formula weight                    | 338.38                                         |                   |
| Temperature                       | 200(2) K                                       |                   |
| Wavelength                        | 1.54178 Å                                      |                   |
| Crystal system                    | Monoclinic                                     |                   |
| Space group                       | C2/c                                           |                   |
| Unit cell dimensions              | a = 17.4908(4) Å                               | α = 90°.          |
|                                   | b = 8.9534(2) Å                                | β = 108.5396(8)°. |
|                                   | c = 24.3196(7) Å                               | γ = 90°.          |
| Volume                            | 3610.85(16) Å <sup>3</sup>                     |                   |
| Z                                 | 8                                              |                   |
| Density (calculated)              | 1.245 Mg/m <sup>3</sup>                        |                   |
| Absorption coefficient            | 0.691 mm <sup>-1</sup>                         |                   |
| F(000)                            | 1440                                           |                   |
| Crystal size                      | 0.395 x 0.249 x 0.181 mm <sup>3</sup>          |                   |
| Theta range for data collection   | 3.834 to 74.425°.                              |                   |
| Index ranges                      | -21 ≤ h ≤ 21, -11 ≤ k ≤ 11, -30 ≤ l ≤ 29       |                   |
| Reflections collected             | 39618                                          |                   |
| Independent reflections           | 3684 [R(int) = 0.0246]                         |                   |
| Completeness to theta = 67.679°   | 99.9 %                                         |                   |
| Absorption correction             | Semi-empirical from equivalents                |                   |
| Max. and min. transmission        | 0.9819 and 0.8673                              |                   |
| Refinement method                 | Full-matrix least-squares on F <sup>2</sup>    |                   |
| Data / restraints / parameters    | 3684 / 0 / 229                                 |                   |
| Goodness-of-fit on F <sup>2</sup> | 1.037                                          |                   |
| Final R indices [I > 2σ(I)]       | R1 = 0.0411, wR2 = 0.1069                      |                   |
| R indices (all data)              | R1 = 0.0427, wR2 = 0.1083                      |                   |
| Extinction coefficient            | n/a                                            |                   |
| Largest diff. peak and hole       | 0.202 and -0.263 e.Å <sup>-3</sup>             |                   |

### Preparation of **2ac**:

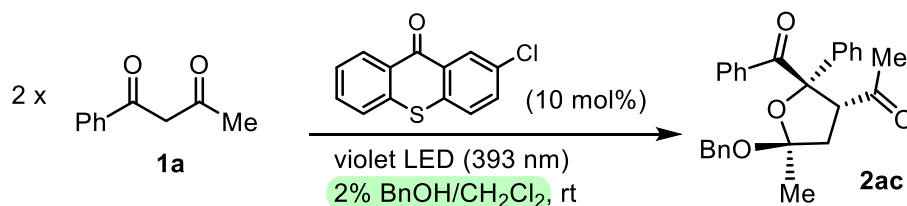

A magnetic stirring bar and 1-phenylbutane-1,3-dione (**1a**, 20 mg, 0.12 mmol)<sup>1</sup> were placed in a 4-mL sample vial, followed by the addition of 2-chloro-9H-thioxanthen-9-one (3.0 mg, 0.01 mmol, 0.1 equiv) in 2% benzyl alcohol/CH<sub>2</sub>Cl<sub>2</sub> (1.2 mL). The solution was purged with argon and closed with a screw cap. The solution was stirred and irradiated with the violet LEDs (393 nm, 2 x 10 W) at room temperature for 48 h until the completion of the reaction, monitored by TLC. After the irradiation, the reaction solution was concentrated *in vacuo* to give a residue. The crude product was purified by column chromatography with 5% EtOAc–hexane to afford **2ac** ( $R_f$  = 0.46 in 15% EtOAc–hexane; 20.6 mg, 81% yield) as a yellow liquid.

Selected data for **2ac**: IR (neat): 3064, 3030, 2991, 2949, 1711, 1681, 1595, 1447, 1357, 1314, 1225, 1176, 1108, 1025, 881, 753, 698 cm<sup>-1</sup>; <sup>1</sup>H NMR (500 MHz, CDCl<sub>3</sub>):  $\delta$  7.80 – 7.77 (m, 2 H), 7.37 – 7.24 (m, 6 H), 7.21 – 7.14 (m, 5 H), 6.87 – 6.84 (m, 2 H), 4.82 (dd,  $J$  = 8.8, 7.8 Hz, 1 H), 4.22 (d,  $J$  = 11.6 Hz, 1 H), 3.74 (d,  $J$  = 11.6 Hz, 1 H), 2.58 (dd,  $J$  = 13.0, 8.8 Hz, 1 H), 2.22 (dd,  $J$  = 13.0, 7.8 Hz, 1 H), 1.86 (s, 3 H), 1.78 (s, 3 H); <sup>13</sup>C NMR (125 MHz, CDCl<sub>3</sub>):  $\delta$  207.4 (C), 198.4 (C), 138.2 (C), 137.9 (C), 133.9 (C), 132.5 (CH), 131.1 (two CH), 128.6 (two CH), 128.4 (CH), 127.9 (two CH), 127.7 (two CH), 126.9 (CH), 126.6 (two CH), 125.4 (two CH), 109.1 (C), 93.9 (C), 63.9 (CH<sub>2</sub>), 57.3 (CH), 41.1 (CH<sub>2</sub>), 31.2 (CH<sub>3</sub>), 21.6 (CH<sub>3</sub>); HRMS (GC-EI-TOF)  $m/z$ : [M]<sup>+</sup> Calcd for C<sub>27</sub>H<sub>26</sub>O<sub>4</sub> 414.1831; found 414.1823.

### Preparation of **2ad**:

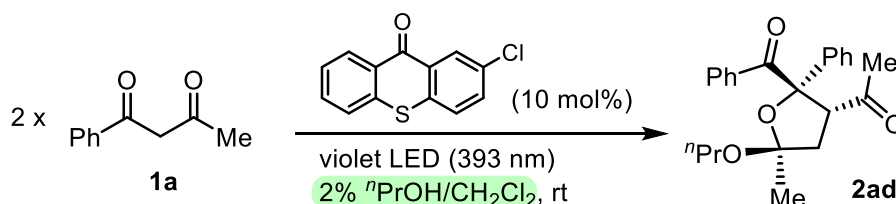

A magnetic stirring bar and 1-phenylbutane-1,3-dione (**1a**, 20 mg, 0.12 mmol)<sup>1</sup> were placed in a 4-mL sample vial, followed by the addition of 2-chloro-9H-thioxanthen-9-one (3.0 mg, 0.01 mmol, 0.1 equiv) in 2% *n*-propanol/CH<sub>2</sub>Cl<sub>2</sub> (1.2 mL).

The solution was purged with argon and closed with a screw cap. The solution was stirred and irradiated with the violet LEDs (393 nm, 2 x 10 W) at room temperature for 48 h until the completion of the reaction, monitored by TLC. After the irradiation, the reaction solution was concentrated *in vacuo* to give a residue. The crude product was purified by column chromatography with 5% EtOAc–hexane to afford **2ad** ( $R_f = 0.42$  in 15% EtOAc–hexane; 13.7 mg, 61% yield) as a pale-yellow solid.

Selected data for **2ad**: mp: 79-80 °C; IR (neat): 3064, 2963, 2877, 1712, 1683, 1593, 1447, 1357, 1314, 1227, 1177, 1106, 1028, 877, 755, 701  $\text{cm}^{-1}$ ;  $^1\text{H}$  NMR (500 MHz,  $\text{CDCl}_3$ ):  $\delta$  7.95 – 7.90 (m, 2 H), 7.43 – 7.37 (m, 1 H), 7.31 – 7.21 (m, 7 H), 4.75 (t,  $J = 8.0$  Hz, 1 H), 3.07 (td,  $J = 8.5, 6.4$  Hz, 1 H), 2.61 (td,  $J = 8.5, 5.5$  Hz, 1 H), 2.49 (dd,  $J = 12.9, 8.0$  Hz, 1 H), 2.07 (dd,  $J = 12.9, 8.0$  Hz, 1 H), 1.84 (s, 3 H), 1.68 (s, 3 H), 1.16 – 1.05 (m, 1 H), 0.93 – 0.83 (m, 1 H), 0.45 (t,  $J = 7.4$  Hz, 3 H);  $^{13}\text{C}$  NMR (125 MHz,  $\text{CDCl}_3$ ):  $\delta$  207.6 (C), 198.5 (C), 138.0 (C), 134.0 (C), 132.5 (CH), 131.2 (two CH), 128.6 (two CH), 128.3 (CH), 127.8 (two CH), 125.4 (two CH), 108.7 (C), 93.5 (C), 63.7 (CH<sub>2</sub>), 57.3 (CH), 41.0 (CH<sub>2</sub>), 31.2 (CH<sub>3</sub>), 22.4 (CH<sub>2</sub>), 21.3 (CH<sub>3</sub>), 10.0 (CH<sub>3</sub>); HRMS (GC-EI-TOF)  $m/z$ :  $[\text{M}]^+$  Calcd for  $\text{C}_{23}\text{H}_{26}\text{O}_4$  366.1831; found 366.1824.

### Preparation of **2ae**:

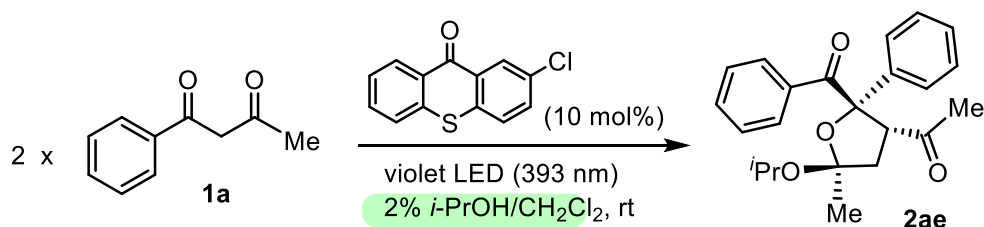

A magnetic stirring bar and 1-phenylbutane-1,3-dione (**1a**, 20 mg, 0.123 mmol)<sup>1</sup> were placed in a 4-mL sample vial, followed by the addition of 2-chloro-9H-thioxanthen-9-one (3.0 mg, 0.01 mmol, 0.1 equiv) in 2% *iso*-propanol/ $\text{CH}_2\text{Cl}_2$  (1.2 mL). The vial was purged with argon and closed with a screw cap. The vial was stirred and irradiated with a violet LED (393 nm, 2x10 W) at r.t. for 48 h until the completion of the reaction, monitored by TLC. After the irradiation, the reaction solution was concentrated *in vacuo* to give a residue. The crude product was purified by column chromatography with 5% EtOAc–hexane to afford **2ae** ( $R_f = 0.40$  in 15% EtOAc–hexane; 9.9 mg, 44% yield) as a pale-yellow liquid. The diastereomeric ratio of the products was determined to be ca. 14:1 by  $^1\text{H}$  NMR analysis.

Selected data for **2ae**: IR (neat): 3062, 2979, 2926, 1712, 1683, 1592, 1448, 1380, 1309, 1225, 1177, 1101, 989, 880, 756, 700  $\text{cm}^{-1}$ ;  $^1\text{H}$  NMR (500 MHz,  $\text{CDCl}_3$ , for the major isomer):  $\delta$  7.95 – 7.92 (m, 2 H), 7.42 – 7.37 (m, 1 H), 7.28 – 7.23 (m, 4 H), 7.23

– 7.21 (m, 1 H), 7.20 – 7.16 (m, 2 H), 4.72 (dd,  $J = 11.2, 7.2$  Hz, 1 H), 3.68 – 3.59 (m, 1 H), 2.44 (dd,  $J = 12.8, 11.2$  Hz, 1 H), 2.04 (s, 3 H), 2.03 (dd,  $J = 12.8, 11.2$  Hz, 1 H), 1.75 (s, 3 H), 0.98 (d,  $J = 6.0$  Hz, 3 H), 0.55 (d,  $J = 6.0$  Hz, 3 H);  $^{13}\text{C}$  NMR (125 MHz,  $\text{CDCl}_3$ , for the major isomer):  $\delta$  206.9 (C), 197.9 (C), 138.7 (C), 134.2 (C), 132.7 (CH), 131.4 (two CH), 128.6 (two CH), 128.2 (CH), 127.8 (two CH), 125.0 (two CH), 108.5 (C), 93.6 (C), 64.4 (CH), 57.0 (CH), 41.0 ( $\text{CH}_2$ ), 31.3 ( $\text{CH}_3$ ), 24.4 ( $\text{CH}_3$ ), 23.4 ( $\text{CH}_3$ ), 23.3 ( $\text{CH}_3$ ); HRMS (GC-EI-TOF)  $m/z$ :  $[\text{M}]^+$  Calcd for  $\text{C}_{23}\text{H}_{26}\text{O}_4$  366.1831; found 366.1823.

### Preparation of **2ba**:

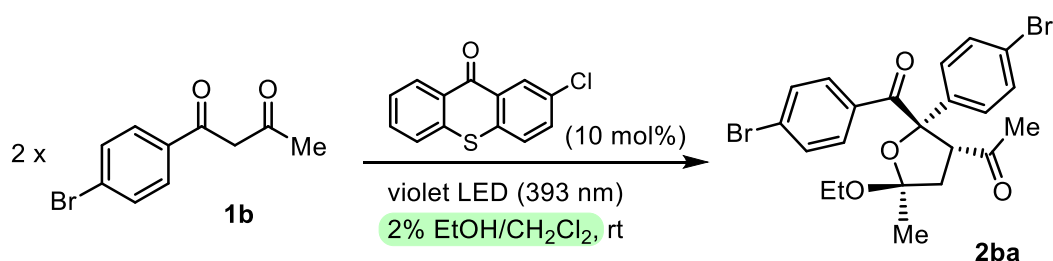

A magnetic stirring bar and 1-(4-bromophenyl)butane-1,3-dione (**1b**, 20 mg, 0.08 mmol)<sup>2</sup> were placed in a 4-mL sample vial, followed by the addition of 2-chloro-9H-thioxanthen-9-one (2.0 mg, 0.008 mmol, 0.1 equiv) in 2% ethanol/ $\text{CH}_2\text{Cl}_2$  (0.8 mL). The solution was purged with argon and closed with a screw cap. The solution was stirred and irradiated with the violet LEDs (393 nm, 2 x 10 W) at room temperature for 48 h until the completion of the reaction, monitored by TLC. After the irradiation, the reaction solution was concentrated *in vacuo* to give a residue. The crude product was purified by column chromatography with 5-10% EtOAc–hexane to afford **2ba** ( $R_f = 0.42$  in 20% EtOAc–hexane; 13.1 mg, 62% yield) as a yellow solid.

Selected data for **2ba**: mp: 128-129 °C; IR (neat): 2979, 2933, 1711, 1684, 1582, 1484, 1394, 1225, 1176, 1105, 1069, 1007, 950, 813  $\text{cm}^{-1}$ ;  $^1\text{H}$  NMR (500 MHz,  $\text{CDCl}_3$ ):  $\delta$  7.79 – 7.76 (m, 2 H), 7.44 – 7.39 (m, 4 H), 7.10 (d,  $J = 8.0$  Hz, 2 H), 4.73 (t,  $J = 8.5$  Hz, 1 H), 3.23 (dq,  $J = 8.8, 7.0$  Hz, 1 H), 2.74 (dq,  $J = 8.8, 7.0$  Hz, 1 H), 2.43 (dd,  $J = 13.0, 8.5$  Hz, 1 H), 2.07 (dd,  $J = 13.0, 8.5$  Hz, 1 H), 1.86 (s, 3 H), 1.66 (s, 3 H), 0.62 (t,  $J = 7.0$  Hz, 3 H);  $^{13}\text{C}$  NMR (125 MHz,  $\text{CDCl}_3$ ):  $\delta$  207.2 (C), 197.1 (C), 136.8 (C), 132.6 (two CH), 132.4 (C), 131.9 (two CH), 131.3 (two CH), 128.2 (C), 127.1 (two CH), 122.8 (C), 109.0 (C), 92.9 (C), 57.6 ( $\text{CH}_2$ ), 57.0 (CH), 41.2 ( $\text{CH}_2$ ), 31.5 ( $\text{CH}_3$ ), 21.2

<sup>2</sup> Compound **1b** was prepared according to literature procedures: (a) An, Z.; Liu, Y.; Yan, R.; Zhao, P. *Adv. Synth. Catal.* **2021**, 363, 3240 – 3244. (b) Yuan, Y.; Hou, W.; Zhang-Negrerie, D.; Zhao, K.; Du, Y. *Org. Lett.* **2014**, 16, 5410 – 5413.

(CH<sub>3</sub>), 14.5 (CH<sub>3</sub>); HRMS (GC-EI-TOF) *m/z*: [M]<sup>+</sup> Calcd for C<sub>22</sub>H<sub>22</sub>O<sub>4</sub>Br<sub>2</sub> 507.9885; found 507.9878.

### Preparation of 2ca:

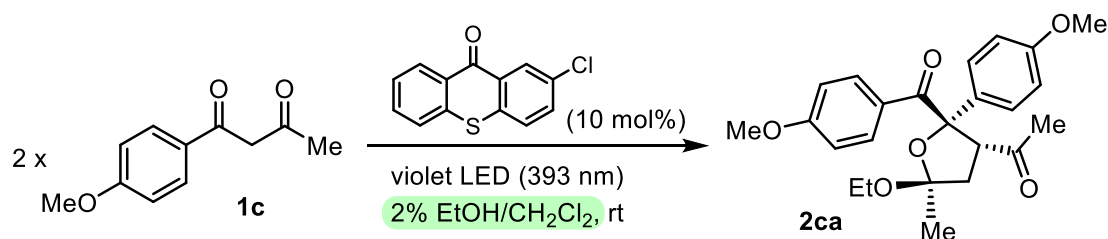

A magnetic stirring bar and 1-(4-methoxyphenyl)butane-1,3-dione (20 mg, 0.10 mmol)<sup>1</sup> were placed in a 4-mL sample vial, followed by the addition of 2-chloro-9*H*-thioxanthene-9-one (2.6 mg, 0.01 mmol, 0.1 equiv) in 2% ethanol/CH<sub>2</sub>Cl<sub>2</sub> (1.0 mL). The solution was purged with argon and closed with a screw cap. The solution was stirred and irradiated with the violet LEDs (393 nm, 2 x 10 W) at room temperature for 48 h until the completion of the reaction, monitored by TLC. After the irradiation, the reaction solution was concentrated *in vacuo* to give a residue. The crude product was purified by column chromatography with 5% EtOAc–hexane to afford **2ca** (*R<sub>f</sub>* = 0.34 in 15% EtOAc–hexane; 15.7 mg, 73% yield) as a yellow liquid.

Selected data for **2ca**: IR (neat): 2973, 2933, 2841, 1712, 1673, 1600, 1510, 1307, 1252, 1176, 1109, 1030, 833 cm<sup>-1</sup>; <sup>1</sup>H NMR (500 MHz, CDCl<sub>3</sub>): δ 7.93 (d, *J* = 9.0 Hz, 2 H), 7.14 (d, *J* = 9.0 Hz, 2 H), 6.77 (d, *J* = 9.0 Hz, 2 H), 6.75 (d, *J* = 9.0 Hz, 2 H), 4.75 (t, *J* = 8.5 Hz, 1 H), 3.78 (s, 3 H), 3.73 (s, 3 H), 3.20 (dq, *J* = 8.8, 7.0 Hz, 1 H), 2.78 (dq, *J* = 8.8, 7.0 Hz, 1 H), 2.47 (dd, *J* = 12.9, 8.5 Hz, 1 H), 2.04 (dd, *J* = 12.9, 8.5 Hz, 1 H), 1.83 (s, 3 H), 1.65 (s, 3 H), 0.62 (t, *J* = 7.0 Hz, 3 H); <sup>13</sup>C NMR (125 MHz, CDCl<sub>3</sub>): δ 207.9 (C), 197.4 (C), 162.9 (C), 159.3 (C), 133.5 (two CH), 130.4 (C), 127.0 (C), 126.8 (two CH), 113.8 (two CH), 113.0 (two CH), 108.3 (C), 93.2 (C), 57.4 (CH<sub>2</sub>), 57.0 (CH), 55.3 (CH<sub>3</sub>), 55.1 (CH<sub>3</sub>), 41.0 (CH<sub>2</sub>), 31.2 (CH<sub>3</sub>), 21.3 (CH<sub>3</sub>), 14.6 (CH<sub>3</sub>); HRMS (GC-EI-TOF) *m/z*: [M]<sup>+</sup> Calcd for C<sub>24</sub>H<sub>28</sub>O<sub>6</sub> 412.1886; found 412.1880.

### Preparation of 2da:

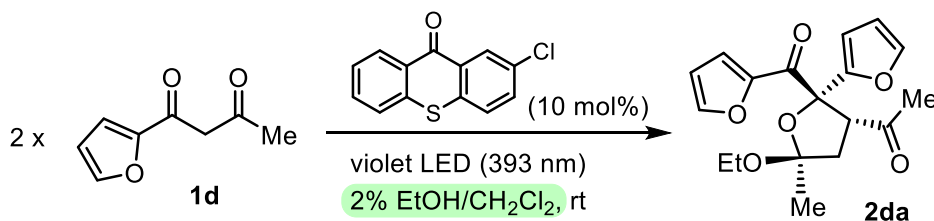

A magnetic stirring bar and 1-(furan-2-yl)butane-1,3-dione (**1d**, 20 mg, 0.13 mmol)<sup>1</sup> were placed in a 4-mL sample vial, followed by the addition of 2-chloro-9H-thioxanthen-9-one (3.2 mg, 0.01 mmol, 0.1 equiv) in 2% ethanol/CH<sub>2</sub>Cl<sub>2</sub> (1.3 mL). The solution was purged with argon and closed with a screw cap. The solution was stirred and irradiated with the violet LEDs (393 nm, 2 x 10 W) at room temperature for 48 h until the completion of the reaction, monitored by TLC. After the irradiation, the reaction solution was concentrated *in vacuo* to give a residue. The crude product was purified by column chromatography with 5-10% EtOAc–hexane to afford **2da** ( $R_f$  = 0.33 in 15% EtOAc–hexane; 18.3 mg, 84% yield) as a pale-yellow liquid.

Selected data for **2da**: IR (neat): 2920, 2850, 1712, 1676, 1462, 1388, 1278, 1229, 1156, 1047, 1021, 906, 775, 593 cm<sup>-1</sup>; <sup>1</sup>H NMR (500 MHz, CDCl<sub>3</sub>):  $\delta$  7.60 (dd,  $J$  = 1.5, 0.5 Hz, 1 H), 7.26 – 7.25 (m, 2 H), 6.45 (dd,  $J$  = 3.6, 1.5 Hz, 1 H), 6.28 (dd,  $J$  = 3.4, 1.8 Hz, 1 H), 6.26 (dd,  $J$  = 3.4, 0.9 Hz, 1 H), 4.64 (dd,  $J$  = 10.7, 7.5 Hz, 1 H), 3.31 (dq,  $J$  = 8.8, 7.0 Hz, 1 H), 3.09 (dq,  $J$  = 8.8, 7.0 Hz, 1 H), 2.49 (dd,  $J$  = 12.5, 10.7 Hz, 1 H), 2.07 (dd,  $J$  = 12.5, 7.5 Hz, 1 H), 2.05 (s, 3 H), 1.60 (s, 3 H), 0.75 (t,  $J$  = 7.0 Hz, 3 H); <sup>13</sup>C NMR (125 MHz, CDCl<sub>3</sub>):  $\delta$  206.2 (C), 184.9 (C), 151.1 (C), 149.9 (C), 147.1 (CH), 142.9 (CH), 121.9 (CH), 112.0 (CH), 110.7 (CH), 108.5 (CH), 108.4 (C), 88.3 (C), 57.5 (CH<sub>2</sub>), 55.2 (CH), 40.3 (CH<sub>2</sub>), 30.3 (CH<sub>3</sub>), 21.2 (CH<sub>3</sub>), 14.6 (CH<sub>3</sub>); HRMS (GC-EI-TOF)  $m/z$ : [M]<sup>+</sup> Calcd for C<sub>18</sub>H<sub>20</sub>O<sub>6</sub> 332.1260; found 332.1255.

### Preparation of 2db:

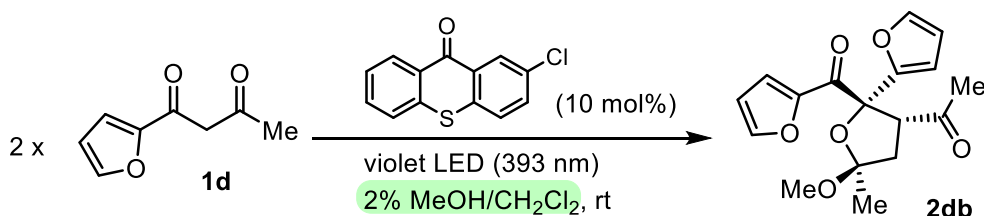

A magnetic stirring bar and 1-(furan-2-yl)butane-1,3-dione (**1d**, 20 mg, 0.13 mmol)<sup>1</sup> were placed in a 4-mL sample vial, followed by the addition of 2-chloro-9H-thioxanthen-9-one (3.2 mg, 0.01 mmol, 0.1 equiv) in 2% methanol/CH<sub>2</sub>Cl<sub>2</sub> (1.3 mL). The solution was purged with argon and closed with a screw cap. The solution was stirred and irradiated with the violet LEDs (393 nm, 2 x 10 W) at room temperature for

40 h until the completion of the reaction, monitored by TLC. After the irradiation, the reaction solution was concentrated *in vacuo* to give a residue. The crude product was purified by column chromatography with 5-10% EtOAc–hexane to afford **2db** ( $R_f = 0.29$  in 15% EtOAc–hexane; 18.2 mg, 87% yield) as a yellow liquid.

Selected data for **2db**: IR (neat): 3139, 2990, 2949, 2836, 1712, 1677, 1462, 1385, 1231, 1176, 1154, 1081, 1023, 861, 779  $\text{cm}^{-1}$ ;  $^1\text{H}$  NMR (500 MHz,  $\text{CDCl}_3$ ):  $\delta$  7.60 (dd,  $J = 1.7, 0.8$  Hz, 1 H), 7.27 – 7.23 (m, 2 H), 6.45 (dd,  $J = 3.4, 1.7$  Hz, 1 H), 6.28 (dd,  $J = 3.4, 1.8$  Hz, 1 H), 6.25 (dd,  $J = 3.4, 0.8$  Hz, 1 H), 4.59 (dd,  $J = 10.7, 7.5$  Hz, 1 H), 2.90 (s, 3 H), 2.51 (dd,  $J = 12.8, 10.7$  Hz, 1 H), 2.06 (dd,  $J = 12.8, 7.5$  Hz, 1 H), 2.05 (s, 3H), 1.59 (s, 3 H);  $^{13}\text{C}$  NMR (125 MHz,  $\text{CDCl}_3$ ):  $\delta$  206.0 (C), 184.6 (C), 151.0 (C), 149.9 (C), 147.2 (CH), 143.0 (CH), 121.9 (CH), 112.0 (CH), 110.7 (CH), 108.6 (C), 108.5 (CH), 88.4 (C), 55.0 (CH), 49.4 ( $\text{CH}_3$ ), 40.0 ( $\text{CH}_2$ ), 30.3 ( $\text{CH}_3$ ), 20.5 ( $\text{CH}_3$ ); HRMS (GC-EI-TOF)  $m/z$ :  $[\text{M}]^+$  Calcd for  $\text{C}_{17}\text{H}_{18}\text{O}_6$  318.1103; found 318.1100.

### Preparation of **2eb**:

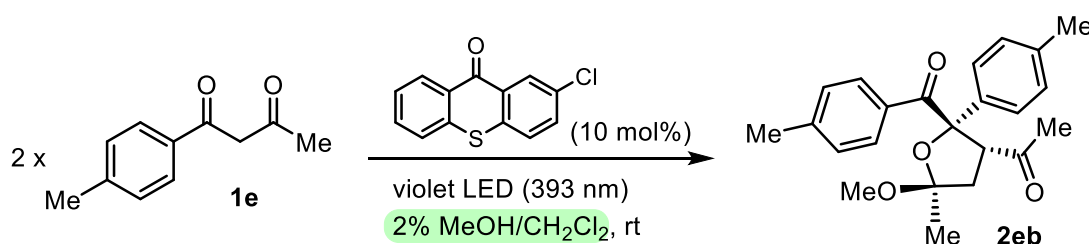

A magnetic stirring bar and 1-(*p*-tolyl)butane-1,3-dione (**1e**, 20 mg, 0.11 mmol)<sup>3</sup> were placed in a 4-mL sample vial, followed by the addition of 2-chloro-9H-thioxanthen-9-one (2.8 mg, 0.01 mmol, 0.1 equiv) in 2% methanol/ $\text{CH}_2\text{Cl}_2$  (1.1 mL). The solution was purged with argon and closed with a screw cap. The solution was stirred and irradiated with the violet LEDs (393 nm, 2 x 10 W) at room temperature for 40 h until the completion of the reaction, monitored by TLC. After the irradiation, the reaction solution was concentrated *in vacuo* to give a residue. The crude product was purified by column chromatography with 5% EtOAc–hexane to afford **2eb** ( $R_f = 0.39$  in 15% EtOAc–hexane; 15.6 mg, 75% yield) as a colorless liquid.

Selected data for **2eb**: IR (neat): 3031, 2990, 2953, 2831, 1712, 1680, 1606, 1449, 1355, 1317, 1229, 1181, 1108, 1033, 875, 817, 775  $\text{cm}^{-1}$ ;  $^1\text{H}$  NMR (500 MHz,  $\text{CDCl}_3$ ):  $\delta$  7.77 (d,  $J = 8.0$  Hz, 2 H), 7.13 (d,  $J = 8.0$  Hz, 2 H), 7.06 (d,  $J = 8.0$  Hz, 4 H), 4.71 (t,  $J = 8.0$  Hz, 1 H), 2.60 (s, 3 H), 2.49 (dd,  $J = 13.0, 8.0$  Hz, 1 H), 2.29 (s, 3 H), 2.26 (s, 3

<sup>3</sup> Compound **1e** was prepared according to literature procedures: (a) Berti, F.; Bincoletto, S.; Donati, I.; Fontanive, G.; Fregonese, M.; Benedetti, F. *Org. Biomol. Chem.* **2011**, *9*, 1987 – 1999. (b) An, Z.; Liu, Y.; Yan, R.; Zhao, P. *Adv. Synth. Catal.* **2021**, *363*, 3240 – 3244.

H), 2.02 (dd,  $J = 13.0, 8.0$  Hz, 1 H), 1.78 (s, 3 H), 1.63 (s, 3 H);  $^{13}\text{C}$  NMR (125 MHz,  $\text{CDCl}_3$ ):  $\delta$  207.8 (C), 198.5 (C), 143.1 (C), 138.0 (C), 134.9 (C), 131.9 (C), 131.1 (two CH), 129.3 (two CH), 128.5 (two CH), 125.4 (two CH), 108.8 (C), 93.6 (C), 57.1 (CH), 49.6 ( $\text{CH}_3$ ), 40.8 ( $\text{CH}_2$ ), 31.2 ( $\text{CH}_3$ ), 21.6 ( $\text{CH}_3$ ), 21.1 ( $\text{CH}_3$ ), 20.5 ( $\text{CH}_3$ ); HRMS (GC-EI-TOF)  $m/z$ :  $[\text{M}]^+$  Calcd for  $\text{C}_{23}\text{H}_{26}\text{O}_4$  366.1831; found 366.1823.

### Preparation of **2fb**:

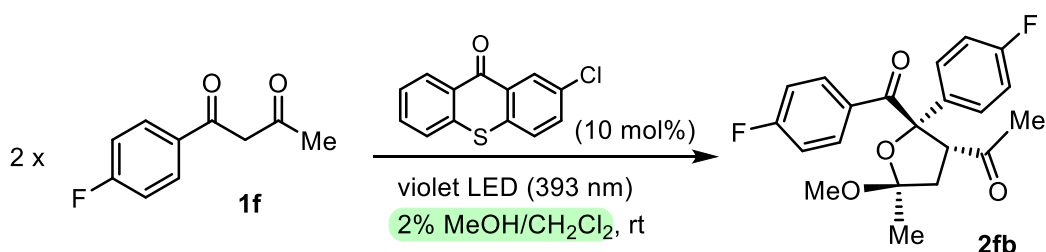

A magnetic stirring bar and 1-(4-fluorophenyl)butane-1,3-dione (**1f**, 20 mg, 0.11 mmol)<sup>4</sup> were placed in a 4-mL sample vial, followed by the addition of 2-chloro-9H-thioxanthen-9-one (2.7 mg, 0.01 mmol, 0.1 equiv) in 2% methanol/ $\text{CH}_2\text{Cl}_2$  (1.1 mL). The solution was purged with argon and closed with a screw cap. The solution was stirred and irradiated with the violet LEDs (393 nm, 2 x 10 W) at room temperature for 40 h until the completion of the reaction, monitored by TLC. After the irradiation, the reaction solution was concentrated *in vacuo* to give a residue. The crude product was purified by column chromatography with 5% EtOAc–hexane to afford **2fb** ( $R_f = 0.34$  in 15% EtOAc–hexane; 16.7 mg, 80% yield) as a yellow solid.

Selected data for **2fb**: m.p: 123–125 °C; IR (neat): 3076, 2993, 2957, 2833, 1714, 1684, 1599, 1507, 1358, 1232, 1160, 1106, 1035, 877, 838, 785  $\text{cm}^{-1}$ ;  $^1\text{H}$  NMR (500 MHz,  $\text{CDCl}_3$ ):  $\delta$  7.91 – 7.86 (m, 2 H), 7.27 – 7.21 (m, 2 H), 7.01 – 6.92 (m, 4 H), 4.70 (t,  $J = 8.0$  Hz, 1 H), 2.60 (s, 3 H), 2.46 (dd,  $J = 13.1, 8.0$  Hz, 1 H), 2.04 (dd,  $J = 13.1, 8.0$  Hz, 1 H), 1.79 (s, 3 H), 1.63 (s, 3 H);  $^{13}\text{C}$  NMR (125 MHz,  $\text{CDCl}_3$ ):  $\delta$  207.4 (C), 197.0 (C), 165.1 (d,  $J = 255.3$  Hz, C), 162.6 (d,  $J = 248.5$  Hz, C), 133.6 (d,  $J = 9.2$  Hz, two CH), 133.3 (d,  $J = 3.3$  Hz, C), 130.5 (d,  $J = 3.0$  Hz, C), 127.3 (d,  $J = 8.2$  Hz, two CH), 115.8 (d,  $J = 21.6$  Hz, two CH), 115.1 (d,  $J = 21.9$  Hz, two CH), 109.3 (C), 93.1 (C), 57.0 (CH), 49.7 ( $\text{CH}_3$ ), 41.0 ( $\text{CH}_2$ ), 31.3 ( $\text{CH}_3$ ), 20.5 ( $\text{CH}_3$ );  $^{19}\text{F}$  NMR (470 MHz,  $\text{CDCl}_3$ ):  $\delta$  -105.1 – -105.2 (m), -112.9 – -113.0 (m); HRMS (GC-EI-TOF)  $m/z$ :  $[\text{M}]^+$  Calcd for  $\text{C}_{21}\text{H}_{20}\text{F}_2\text{O}_4$  374.1330; found 374.1327.

<sup>4</sup> Compound **1f** was prepared according to literature procedures: (a) Sun, X.; Lyu, Y.; Zhang-Negreie, D.; Du, Y.; Zhao, K. *Org. Lett.* **2013**, *15*, 6222 – 6225. (b) An, Z.; Liu, Y.; Yan, R.; Zhao, P. *Adv. Synth. Catal.* **2021**, *363*, 3240 – 3244.



**Recrystallization of 2fb was performed as follows:**

The compound (**2fb**, ~5 mg) in a screw-capped vial (4 mL vial) was dissolved in  $\text{CH}_2\text{Cl}_2$  (~0.5 mL) and diluted with *n*-hexane (~2.5 mL). The vial was covered with aluminum foil (having 4-5 holes on it) and placed in another vial (20 mL vial) filled with *n*-hexane (~8 mL). The 20 mL vial was closed gently with a screw cap and stands it for 3 days until complete evaporation of the solvent in the inner vial. The crystals formed were subjected to single-crystal X-ray analysis.

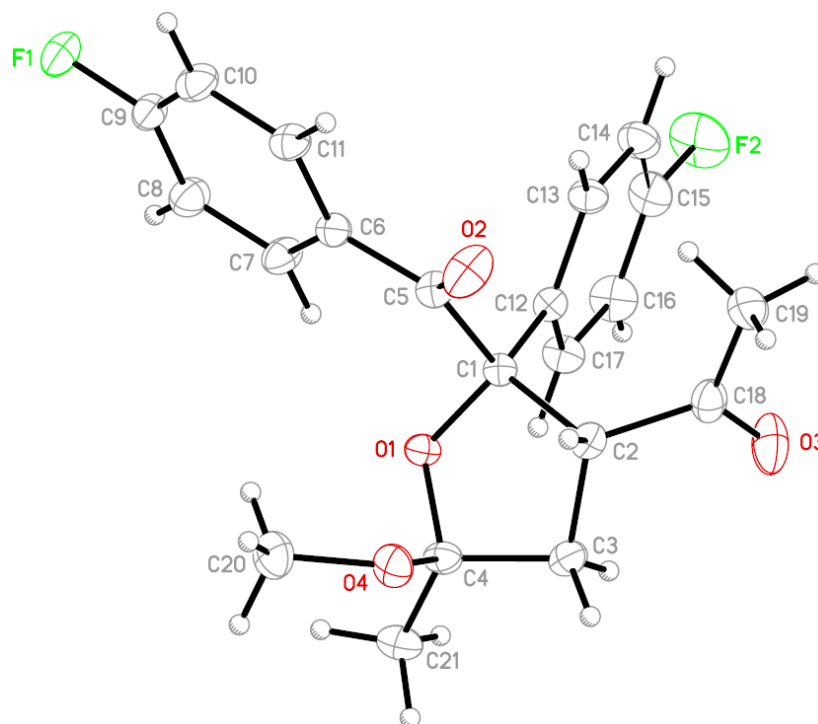

Thermal ellipsoids draw at the 30% probability level

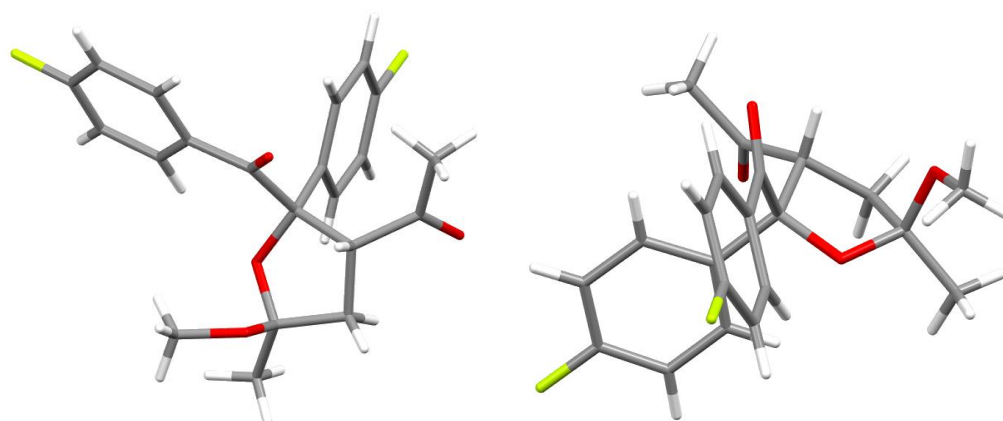

**Figure S3.** ORTEP and Stereo plots for X-ray crystal structures of **2fb** (ic22557).

CCDC 2382211 contains the supplementary crystallographic data for **2fb** (ic22557). These data can be obtained free of charge from the Cambridge Crystallographic Data Centre via [www.ccdc.cam.ac.uk](http://www.ccdc.cam.ac.uk)

**Table S4.** Crystal data and structure refinement for **2fb** (ic22557).

|                                   |                                                               |                 |
|-----------------------------------|---------------------------------------------------------------|-----------------|
| Identification code               | ic22557                                                       |                 |
| Empirical formula                 | C <sub>21</sub> H <sub>20</sub> F <sub>2</sub> O <sub>4</sub> |                 |
| Formula weight                    | 374.37                                                        |                 |
| Temperature                       | 200(2) K                                                      |                 |
| Wavelength                        | 1.54178 Å                                                     |                 |
| Crystal system                    | Monoclinic                                                    |                 |
| Space group                       | C2/c                                                          |                 |
| Unit cell dimensions              | a = 17.2464(4) Å                                              | = 90°.          |
|                                   | b = 9.1025(2) Å                                               | = 109.7066(8)°. |
|                                   | c = 25.1237(7) Å                                              | = 90°.          |
| Volume                            | 3713.06(16) Å <sup>3</sup>                                    |                 |
| Z                                 | 8                                                             |                 |
| Density (calculated)              | 1.339 Mg/m <sup>3</sup>                                       |                 |
| Absorption coefficient            | 0.886 mm <sup>-1</sup>                                        |                 |
| F(000)                            | 1568                                                          |                 |
| Crystal size                      | 0.258 x 0.188 x 0.154 mm <sup>3</sup>                         |                 |
| Theta range for data collection   | 3.737 to 74.599°.                                             |                 |
| Index ranges                      | -21 ≤ h ≤ 21, -11 ≤ k ≤ 11, -31 ≤ l ≤ 31                      |                 |
| Reflections collected             | 53373                                                         |                 |
| Independent reflections           | 3790 [R(int) = 0.0301]                                        |                 |
| Completeness to theta = 67.679°   | 99.7 %                                                        |                 |
| Absorption correction             | Semi-empirical from equivalents                               |                 |
| Max. and min. transmission        | 0.9819 and 0.6840                                             |                 |
| Refinement method                 | Full-matrix least-squares on F <sup>2</sup>                   |                 |
| Data / restraints / parameters    | 3790 / 0 / 247                                                |                 |
| Goodness-of-fit on F <sup>2</sup> | 1.025                                                         |                 |
| Final R indices [I > 2σ(I)]       | R1 = 0.0386, wR2 = 0.1039                                     |                 |
| R indices (all data)              | R1 = 0.0396, wR2 = 0.1050                                     |                 |
| Extinction coefficient            | n/a                                                           |                 |
| Largest diff. peak and hole       | 0.231 and -0.222 e.Å <sup>-3</sup>                            |                 |

### Preparation of 2gb:

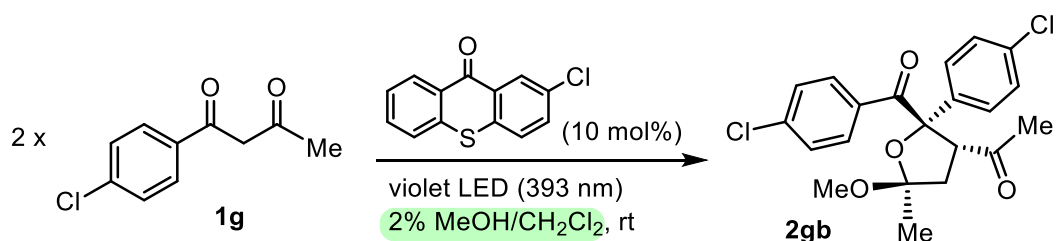

A magnetic stirring bar and 1-(4-chlorophenyl)butane-1,3-dione (**1g**, 20 mg, 0.1 mmol)<sup>5</sup> were placed in a 4-mL sample vial, followed by the addition of 2-chloro-9*H*-thioxanthene-9-one (2.8 mg, 0.01 mmol, 0.1 equiv) in 2% methanol/CH<sub>2</sub>Cl<sub>2</sub> (1.0 mL). The solution was purged with argon and closed with a screw cap. The solution was stirred and irradiated with the violet LEDs (393 nm, 2 x 10 W) at rt for 40 h until the completion of the reaction, monitored by TLC. After the irradiation, the reaction solution was concentrated *in vacuo* to give a residue. The crude product was purified by column chromatography with 5% EtOAc–hexane to afford **2gb** (*R<sub>f</sub>* = 0.42 in 20% EtOAc–hexane; 16.2 mg, 78% yield) as a white solid.

Selected data for **2gb**: m.p: 151-152 °C; IR (neat): 3069, 2991, 2959, 2833, 1714, 1685, 1588, 1489, 1357, 1228, 1177, 1096, 1037, 872, 814, 749 cm<sup>-1</sup>; <sup>1</sup>H NMR (500 MHz, CDCl<sub>3</sub>): δ 7.81 – 7.77 (m, 2 H), 7.28 – 7.24 (m, 4 H), 7.21 – 7.17 (m, 2 H), 4.69 (t, *J* = 8.0 Hz, 1 H), 2.61 (s, 3 H), 2.45 (dd, *J* = 13.0, 8.0 Hz, 1 H), 2.05 (dd, *J* = 13.0, 8.0 Hz, 1 H), 1.81 (s, 3 H), 1.63 (s, 3 H); <sup>13</sup>C NMR (125 MHz, CDCl<sub>3</sub>): δ 207.2 (C), 197.2 (C), 139.1 (C), 136.0 (C), 134.6 (C), 132.4 (C), 132.3 (two CH), 129.0 (two CH), 128.3 (two CH), 126.9 (two CH), 109.4 (C), 93.0 (C), 57.0 (CH), 49.8 (CH<sub>3</sub>), 41.0 (CH<sub>2</sub>), 31.4 (CH<sub>3</sub>), 20.5 (CH<sub>3</sub>); HRMS (GC-EI-TOF) *m/z*: [M]<sup>+</sup> Calcd for C<sub>21</sub>H<sub>20</sub>O<sub>4</sub>Cl<sub>2</sub> 406.0739; found 406.0732.

### Preparation of 2hb:

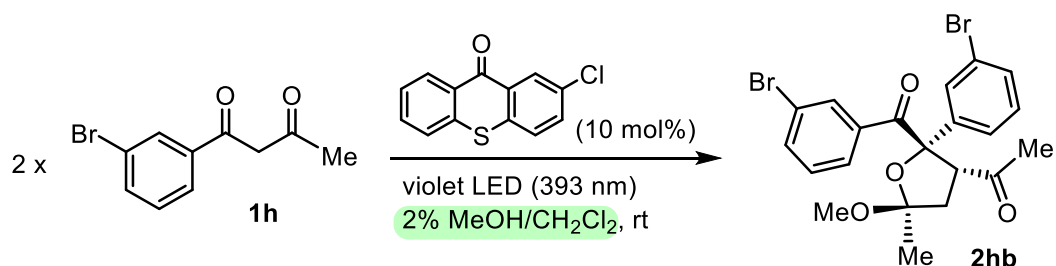

<sup>5</sup> Compound **1g** was prepared according to literature procedures: (a) An, Z.; Liu, Y.; Yan, R.; Zhao, P. *Adv. Synth. Catal.* **2021**, 363, 3240 – 3244. (b) Sun, Xi; Li, Pinhua; Zhang, Xiuli; Wang, Lei *Org. Lett.* **2014**, 16, 2126 – 2129.

A magnetic stirring bar and 1-(3-bromophenyl)butane-1,3-dione (**1h**, 20 mg, 0.08 mmol)<sup>6</sup> were placed in a 4-mL sample vial, followed by the addition of 2-chloro-9*H*-thioxanthen-9-one (2.0 mg, 0.008 mmol, 0.1 equiv) in 2% methanol/CH<sub>2</sub>Cl<sub>2</sub> (0.8 mL). The solution was purged with argon and closed with a screw cap. The solution was stirred and irradiated with the violet LEDs (393 nm, 2 x 10 W) at rt for 40 h until the completion of the reaction, monitored by TLC. After the irradiation, the reaction solution was concentrated *in vacuo* to give a residue. The crude product was purified by column chromatography with 5% EtOAc–hexane to afford **2hb** (*R<sub>f</sub>* = 0.43 in 20% EtOAc–hexane; 14.4 mg, 70% yield) as a pale-yellow liquid.

Selected data for **2hb**: IR (neat): 3068, 2991, 2957, 2833, 1712, 1688, 1565, 1469, 1416, 1357, 1319, 1225, 1176, 1105, 1038, 863, 789, 707 cm<sup>-1</sup>; <sup>1</sup>H NMR (500 MHz, CDCl<sub>3</sub>): δ 8.05 (dd, *J* = 1.7, 1.7 Hz, 1 H), 7.71 – 7.68 (m, 1 H), 7.56 – 7.52 (m, 1 H), 7.45 (s, 1 H), 7.42 – 7.38 (m, 1 H), 7.19 – 7.12 (m, 3 H), 4.66 (t, *J* = 7.8 Hz, 1 H), 2.61 (s, 3 H), 2.44 (dd, *J* = 13.1, 7.7 Hz, 1 H), 2.04 (dd, *J* = 13.1, 8.0 Hz, 1 H), 1.82 (s, 3 H), 1.65 (s, 3 H); <sup>13</sup>C NMR (125 MHz, CDCl<sub>3</sub>): δ 207.1 (C), 196.9 (C), 139.4 (C), 135.8 (C), 135.5 (CH), 133.4 (CH), 131.8 (CH), 130.3 (CH), 129.6 (CH), 129.5 (CH), 128.4 (CH), 123.9 (CH), 123.2 (C), 122.3 (C), 109.6 (C), 92.9 (C), 57.2 (CH), 49.8 (CH<sub>3</sub>), 41.1 (CH<sub>2</sub>), 31.4 (CH<sub>3</sub>), 20.5 (CH<sub>3</sub>); HRMS (GC-EI-TOF) *m/z*: [M]<sup>+</sup> Calcd for C<sub>21</sub>H<sub>20</sub>O<sub>4</sub>Br<sub>2</sub> 493.9728; found 493.9724.

### Preparation of **2ib**:

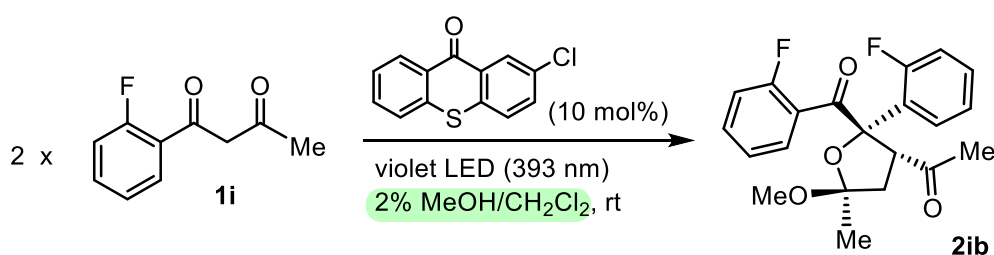

A magnetic stirring bar and 1-(2-fluorophenyl)butane-1,3-dione (**1i**, 20 mg, 0.11 mmol)<sup>7</sup> were placed in a 4-mL sample vial, followed by the addition of 2-chloro-9*H*-thioxanthen-9-one (2.7 mg, 0.011 mmol, 0.1 equiv) in 2% methanol/CH<sub>2</sub>Cl<sub>2</sub> (1.1 mL). The solution was purged with argon and closed with a screw cap. The solution was stirred and irradiated with the violet LEDs (393 nm, 2 x 10 W) at rt for 48 h until the

<sup>6</sup> Compound **1h** was prepared according to literature procedures: (a) Palani, P.; Arumugam, A.; Raja, D.; Muthu, K.; Senadi, G. C. *Chem. Commun.* **2023**, 59, 11433 – 11436. (b) Rajasekar, S.; Anbarasan, P. *Chem. Asian J.* **2019**, 14, 4563 – 4567.

<sup>7</sup> Compound **1i** was prepared according to literature procedures: (a) An, Z.; Liu, Y.; Yan, R.; Zhao, P. *Adv. Synth. Catal.* **2021**, 363, 3240 – 3244. (b) Marichev, K. O.; Wang, Y.; Carranco, A. M.; Garcia, E. C.; Yu, Z.-X.; Doyle, M. P. *Chem. Commun.* **2018**, 54, 9513 – 9516.

completion of the reaction, monitored by TLC. After the irradiation, the reaction solution was concentrated *in vacuo* to give a residue. The crude product was purified by column chromatography with 5% EtOAc–hexane to afford **2ib** ( $R_f = 0.34$  in 20% EtOAc–hexane; 13.7 mg, 66% yield) as a yellow liquid.

Selected data for **2ib**: IR (neat): 3078, 2994, 2955, 2833, 1708, 1609, 1486, 1450, 1227, 1105, 1030, 867, 761  $\text{cm}^{-1}$ ;  $^1\text{H}$  NMR (500 MHz,  $\text{CDCl}_3$ ):  $\delta$  7.68 (ddd,  $J = 7.7, 7.7, 1.8$  Hz, 1 H), 7.48 (ddd,  $J = 7.9, 7.9, 1.8$  Hz, 1 H), 7.39 – 7.33 (m, 1 H), 7.27 – 7.21 (m, 1 H), 7.15 (ddd,  $J = 7.6, 7.6, 1.2$  Hz, 1 H), 7.04 (ddd,  $J = 11.2, 8.3, 1.2$  Hz, 1 H), 6.98 – 6.94 (m, 1 H), 6.88 (ddd,  $J = 11.5, 8.3, 1.2$  Hz, 1 H), 4.88 (dd,  $J = 9.2, 7.7$  Hz, 1 H), 2.81 (s, 3 H), 2.47 (dd,  $J = 12.9, 9.2$  Hz, 1 H), 2.14 (dd,  $J = 12.9, 7.7$  Hz, 1 H), 1.98 (d,  $J = 1.1$  Hz, 3 H), 1.64 (s, 3 H);  $^{13}\text{C}$  NMR (125 MHz,  $\text{CDCl}_3$ ):  $\delta$  207.1 (C), 194.3 (d,  $J = 2.8$  Hz, C), 161.8 (d,  $J = 261.1$  Hz, C), 159.0 (d,  $J = 247.4$  Hz, C), 133.8 (d,  $J = 9.2$  Hz, CH), 131.7 (CH), 130.4 (d,  $J = 8.5$  Hz, CH), 128.3 (d,  $J = 3.5$  Hz, CH), 125.9 (d,  $J = 11.6$  Hz, C), 124.5 (d,  $J = 3.3$  Hz, CH), 123.9 (d,  $J = 9.0$  Hz, C), 123.2 (d,  $J = 4.0$  Hz, CH), 116.9 (d,  $J = 22.8$  Hz, CH), 115.9 (d,  $J = 22.1$  Hz, CH), 109.2 (C), 91.31 (d,  $J = 2.2$  Hz, C), 56.1 (CH), 49.3 ( $\text{CH}_3$ ), 41.1 ( $\text{CH}_2$ ), 30.9 (d,  $J = 2.8$  Hz,  $\text{CH}_3$ ), 20.6 ( $\text{CH}_3$ );  $^{19}\text{F}$  NMR (470 MHz,  $\text{CDCl}_3$ ):  $\delta$  -109.33 – -109.41 (m), -109.81 – -109.89 (m); HRMS (GC-EI-TOF)  $m/z$ :  $[\text{M}]^+$  Calcd for  $\text{C}_{21}\text{H}_{20}\text{F}_2\text{O}_4$  374.1330; found 374.1323.

### Preparation of **2jb**:

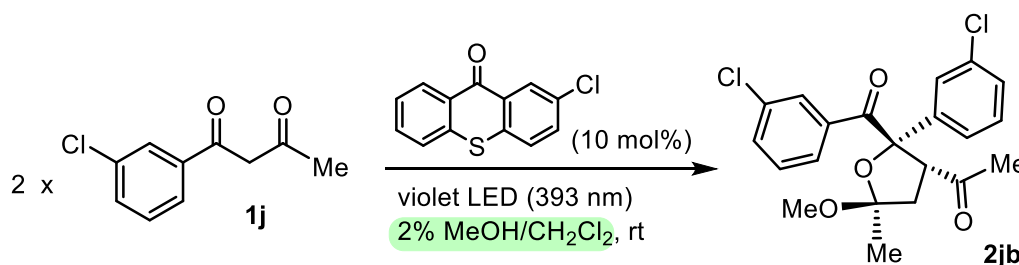

A magnetic stirring bar and 1-(3-chlorophenyl)butane-1,3-dione (**1j**, 20 mg, 0.1 mmol)<sup>8</sup> were placed in a 4-mL sample vial, followed by the addition of 2-chloro-9H-thioxanthen-9-one (2.5 mg, 0.01 mmol, 0.1 equiv) in 2% methanol/ $\text{CH}_2\text{Cl}_2$  (1.0 mL). The solution was purged with argon and closed with a screw cap. The solution was stirred and irradiated with the violet LEDs (393 nm, 2 x 10 W) at rt for 40 h until the completion of the reaction, monitored by TLC. After the irradiation, the reaction solution was concentrated *in vacuo* to give a residue. The crude product was purified by column chromatography with 5% EtOAc–hexane to afford **2jb** ( $R_f = 0.40$  in 20%

<sup>8</sup> Compound **1j** was prepared according to literature procedures: (a) An, Z.; Liu, Y.; Yan, R.; Zhao, P. *Adv. Synth. Catal.* **2021**, 363, 3240 – 3244. (b) He, J.-P.; Huang, G.-S.; Luo, N.; Zhan, Z.-Z.; Zhang, M.-M. *Org. Biomol. Chem.* **2020**, 18, 9831 – 9835.

EtOAc–hexane; 15.3 mg, 74% yield) as a pale-yellow liquid.

Selected data for **2jb**: IR (neat): 3071, 2993, 2956, 2833, 1712, 1688, 1569, 1419, 1357, 1225, 1176, 1105, 1037, 863, 789, 717  $\text{cm}^{-1}$ ;  $^1\text{H}$  NMR (500 MHz,  $\text{CDCl}_3$ ):  $\delta$  7.88 (dd,  $J = 2.0, 2.0$  Hz, 1 H), 7.69 – 7.66 (m, 1 H), 7.39 (ddd,  $J = 7.9, 2.0, 1.0$  Hz, 1 H), 7.30 (brs, 1 H), 7.27 – 7.19 (m, 3 H), 7.12 (brd,  $J = 7.1$  Hz, 1 H), 4.67 (t,  $J = 8.0$  Hz, 1 H), 2.61 (s, 3 H), 2.44 (dd,  $J = 13.1, 8.0$  Hz, 1 H), 2.05 (dd,  $J = 13.1, 8.0$  Hz, 1 H), 1.82 (s, 3 H), 1.66 (s, 3 H);  $^{13}\text{C}$  NMR (125 MHz,  $\text{CDCl}_3$ ):  $\delta$  207.1 (C), 197.0 (C), 139.2 (C), 135.6 (C), 135.1 (C), 134.3 (C), 132.6 (CH), 130.5 (CH), 130.0 (CH), 129.24 (CH), 129.15 (CH), 128.9 (CH), 125.6 (CH), 123.5 (CH), 109.6 (C), 93.0 (C), 57.2 (CH), 49.8 (CH<sub>3</sub>), 41.1 (CH<sub>2</sub>), 31.5 (CH<sub>3</sub>), 20.5 (CH<sub>3</sub>); HRMS (GC-EI-TOF)  $m/z$ :  $[\text{M}-\text{H}]^+$  Calcd for  $\text{C}_{21}\text{H}_{19}\text{O}_4\text{Cl}_2$  405.0660; found 405.0655.

### Preparation of **2kb**:

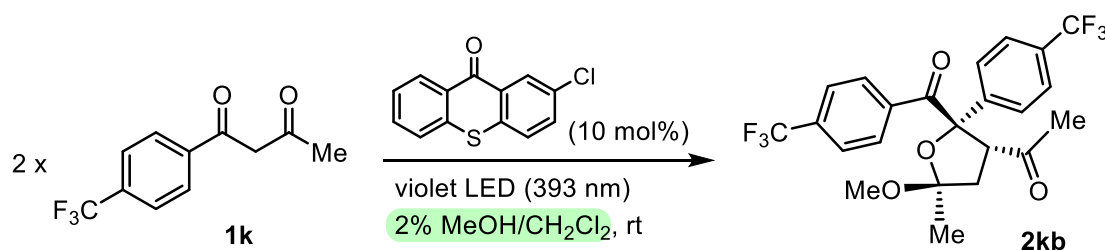

A magnetic stirring bar and 1-(4-(trifluoromethyl)phenyl)butane-1,3-dione (**1k**, 20 mg, 0.09 mmol)<sup>9</sup> were placed in a 4-mL sample vial, followed by the addition of 2-chloro-9H-thioxanthen-9-one (2.7 mg, 0.01 mmol, 0.1 equiv) in 2% methanol/ $\text{CH}_2\text{Cl}_2$  (0.9 mL). The solution was purged with argon and closed with a screw cap. The solution was stirred and irradiated with the violet LEDs (393 nm, 2 x 10 W) at rt for 40 h until the completion of the reaction, monitored by TLC. After the irradiation, the reaction solution was concentrated *in vacuo* to give a residue. The crude product was purified by column chromatography with 5% EtOAc–hexane to afford **2kb** ( $R_f = 0.38$  in 15% EtOAc–hexane; 16.3 mg, 79% yield) as a yellow liquid.

Selected data for **2kb**: IR (neat): 3075, 2994, 2957, 2837, 1714, 1694, 1411, 1326, 1229, 1171, 1129, 1069, 1016, 846  $\text{cm}^{-1}$ ;  $^1\text{H}$  NMR (500 MHz,  $\text{CDCl}_3$ ):  $\delta$  7.93 (d,  $J = 8.2$  Hz, 2 H), 7.59 – 7.54 (m, 4 H), 7.42 (d,  $J = 7.9$  Hz, 2 H), 4.73 (t,  $J = 8.0$  Hz, 1 H), 2.58 (s, 3 H), 2.47 (dd,  $J = 13.1, 8.0$  Hz, 1 H), 2.10 (dd,  $J = 13.1, 8.0$  Hz, 1 H), 1.83 (s, 3 H), 1.66 (s, 3 H);  $^{13}\text{C}$  NMR (126 MHz,  $\text{CDCl}_3$ ):  $\delta$  206.9 (C), 197.3 (C), 141.1 (C), 136.8 (C), 134.0 (q,  $J = 32.7$  Hz, two CH), 131.1 (two CH), 130.9 (q,  $J = 32.9$  Hz, two

<sup>9</sup> Compound **1k** was prepared according to literature procedures: (a) An, Z.; Liu, Y.; Yan, R.; Zhao, P. *Adv. Synth. Catal.* **2021**, 363, 3240 – 3244. (b) He, J.-P.; Huang, G.-S.; Luo, N.; Zhan, Z.-Z.; Zhang, M.-M. *Org. Biomol. Chem.* **2020**, 18, 9831 – 9835.

CH), 125.88 (two CH), 125.87 (q,  $J = 3.7$  Hz, C), 125.1 (q,  $J = 3.7$  Hz, C), 123.7 (q,  $J = 272.4$  Hz, C), 123.5 (q,  $J = 272.7$  Hz, C), 109.8 (C), 93.2 (C), 57.2 (CH), 49.8 (CH<sub>3</sub>), 41.2 (CH<sub>2</sub>), 31.5 (CH<sub>3</sub>), 20.4 (CH<sub>3</sub>); <sup>19</sup>F NMR (470 MHz, CDCl<sub>3</sub>):  $\delta$  -62.79 (s), -63.32 (s); HRMS (GC-EI-TOF)  $m/z$ : [M]<sup>+</sup> Calcd for C<sub>23</sub>H<sub>20</sub>F<sub>6</sub>O<sub>4</sub> 474.12603; found 474.1262.

### Preparation of **2lb**:

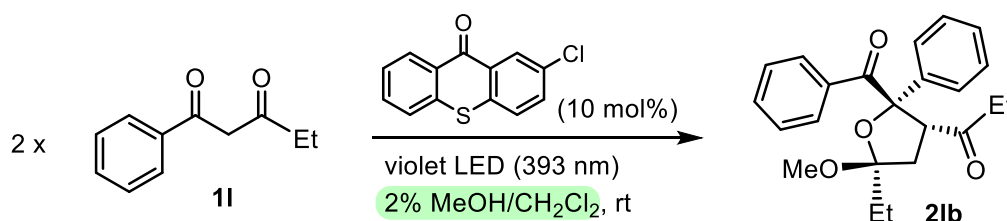

A magnetic stirring bar and 1-phenylpentane-1,3-dione (**11**, 20 mg, 0.11 mmol)<sup>10</sup> were placed in a 4-mL sample vial, followed by the addition of 2-chloro-9H-thioxanthen-9-one (2.8 mg, 0.01 mmol, 0.1 equiv) in 2% methanol/CH<sub>2</sub>Cl<sub>2</sub> (1.1 mL). The solution was purged with argon and closed with a screw cap. The solution was stirred and irradiated with the violet LEDs (393 nm, 2 x 10 W) at rt for 48 h until the completion of the reaction, monitored by TLC. After the irradiation, the reaction solution was concentrated *in vacuo* to give a residue. The crude product was purified by column chromatography with 5% EtOAc–hexane to afford **2lb** ( $R_f = 0.44$  in 20% EtOAc–hexane; 15.2 mg, 73% yield) as a yellow solid.

Selected data for **2lb**: mp: 70–72 °C; IR (neat): 3064, 2974, 2942, 2884, 1714, 1684, 1593, 1452, 1347, 1245, 1181, 1031, 878, 754, 701 cm<sup>-1</sup>; <sup>1</sup>H NMR (500 MHz, CDCl<sub>3</sub>):  $\delta$  7.86 – 7.83 (m, 2 H), 7.40 – 7.36 (m, 1 H), 7.29 – 7.21 (m, 7 H), 4.72 (t,  $J = 8.1$  Hz, 1 H), 2.52 (s, 3 H), 2.49 (dd,  $J = 13.0, 8.0$  Hz, 1 H), 2.23 – 2.16 (m, 2 H), 2.11 – 2.04 (m, 1 H), 2.03 – 1.93 (m, 2 H), 0.95 (t,  $J = 7.5$  Hz, 3 H), 0.55 (t,  $J = 7.2$  Hz, 3 H); <sup>13</sup>C NMR (125 MHz, CDCl<sub>3</sub>):  $\delta$  210.3 (C), 198.9 (C), 137.9 (C), 134.4 (C), 132.4 (CH), 131.0 (two CH), 128.6 (two CH), 128.3 (CH), 127.8 (two CH), 125.5 (two CH), 111.8 (C), 93.6 (C), 55.5 (CH), 49.1 (CH<sub>3</sub>), 38.3 (CH<sub>2</sub>), 37.6 (CH<sub>2</sub>), 26.1 (CH<sub>2</sub>), 8.7 (CH<sub>3</sub>), 7.1 (CH<sub>3</sub>); HRMS (GC-EI-TOF)  $m/z$ : [M]<sup>+</sup> Calcd for C<sub>23</sub>H<sub>26</sub>O<sub>4</sub> 366.1831; found 366.1826.

<sup>10</sup> Compound **11** was prepared according to literature procedures: (a) Geng, H.; Zhou, L.; Wu, W.; Zhang, W.; Chen, J.; Hou, G.; Zou, Y.; Zhang, X. *Angew. Chem. Int. Ed.* **2009**, *48*, 6052 – 6054. (b) Geng, H.; Huang, K.; Sun, T.; Li, W.; Zhang, X.; Zhou, L.; Wu, W.; Zhang, X. *J. Org. Chem.* **2011**, *76*, 332 – 334.

### Preparation of **2ab** from **2aa**:

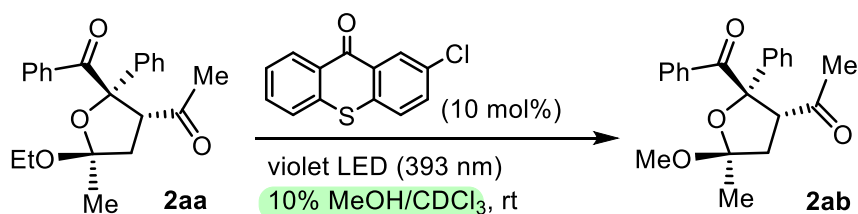

A magnetic stirring bar and **2aa** (20 mg, 0.06 mmol) were placed in a 4-mL sample vial, followed by the addition of 2-chloro-9H-thioxanthen-9-one (1.4 mg, 0.006 mmol, 0.1 equiv) in 10% methanol/CDCl<sub>3</sub> (0.6 mL). The vial was purged with argon and closed with a screw cap. The solution was stirred and irradiated with the violet LEDs (393 nm, 2x10 W) at r.t. for 48 h until the completion of the reaction, monitored by TLC as well as crude <sup>1</sup>H-NMR. After the irradiation, the reaction solution was concentrated *in vacuo* to give a residue. The crude product was purified by column chromatography with 5% EtOAc–hexane to afford **2ab** ( $R_f = 0.37$  in 15% EtOAc–hexane; 18 mg, 94% yield) as a yellow solid.

### Preparation of **2ab'-H/D** from **2aa**:

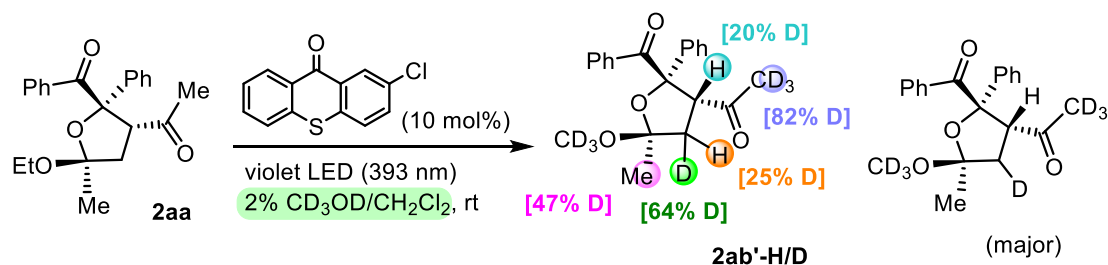

A magnetic stirring bar and **2aa** (10 mg, 0.03 mmol) were placed in a 4-mL sample vial, followed by the addition of 2-chloro-9H-thioxanthen-9-one (0.7 mg, 0.003 mmol, 0.1 equiv) in 2% CD<sub>3</sub>OD/CH<sub>2</sub>Cl<sub>2</sub> (0.4 mL). The solution was purged with argon and closed with a screw cap. The solution was stirred and irradiated with the violet LEDs (393 nm, 2 x 10 W) at rt for 48 h until the completion of the reaction, monitored by TLC. After the irradiation, the reaction solution was concentrated *in vacuo* to give a residue. The crude product was purified by column chromatography with 5% EtOAc–hexane to afford **2ab'-H/D** ( $R_f = 0.36$  in 15% EtOAc–hexane; 8.7 mg, 88% yield) as a yellow solid.

Selected data for **2ab'-H/D**: m.p.: 127-128 °C; IR (neat): 3065, 2915, 2848, 2224, 2069, 1691, 1446, 1327, 1239, 1173, 1024, 754, 697 cm<sup>-1</sup>; <sup>1</sup>H NMR (500 MHz, CDCl<sub>3</sub>):  $\delta$  7.87 – 7.82 (m, 2 H), 7.41 – 7.37 (m, 1 H), 7.31 – 7.24 (m, 7 H), 4.74 – 4.70 (m, 0.8



H), 2.53 – 2.46 (m, 0.75 H), 2.07 – 2.00 (m, 0.35 H), 1.64 (d,  $J = 0.8$  Hz, 1.53 H); For major isomer:  $^1\text{H}$  NMR (500 MHz, Chloroform- $d$ ):  $\delta$  7.87 – 7.82 (m, 2 H), 7.41 – 7.36 (m, 1 H), 7.31 – 7.24 (m, 7 H), 4.71 (d,  $J = 6.8$  Hz, 1 H), 2.07 – 2.01 (m, 1 H), 1.64 (s, 3 H);  $^{13}\text{C}$  NMR (126 MHz,  $\text{CDCl}_3$ ):  $\delta$  207.9–207.8 (m, C), 198.9 (C), 137.6 (C), 134.4 (C), 132.4 (CH), 131.0 (two CH), 128.7 (two CH), 128.4 (CH), 127.8 (two CH), 125.5 (two CH), 109.1 (C), 93.7 (C), 57.3 (CH), 49.1–48.5 (m,  $\text{CD}_3$ ), 40.7 (t,  $J = 20$  Hz, CDH), 31.29 – 30.29 (m,  $\text{CD}_3$ ), 20.6 ( $\text{CH}_3$ ); HRMS (GC-EI-TOF)  $m/z$ :  $[\text{M}]^+$  Calcd for  $\text{C}_{21}\text{H}_{15}\text{O}_4\text{D}_7$  345.1957; found 345.1949.

### Preparation of **2ab-H/D**:

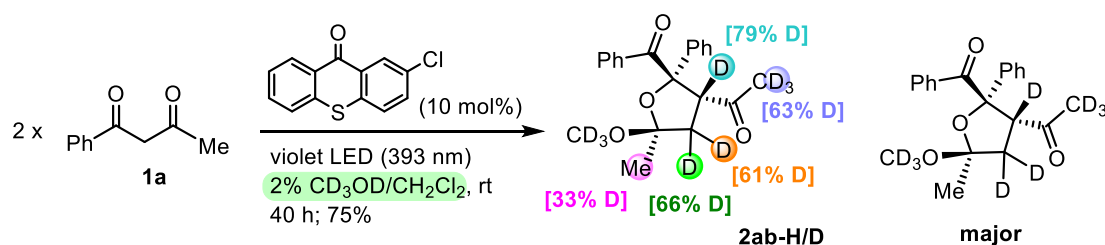

A magnetic stirring bar and 1-phenylbutane-1,3-dione (**1a**, 20 mg, 0.12 mmol) were placed in a 4-mL sample vial, followed by the addition of 2-chloro-9H-thioxanthene-9-one (3.0 mg, 0.012 mmol, 0.1 equiv) in 2%  $\text{CD}_3\text{OD}/\text{CH}_2\text{Cl}_2$  (1.2 mL). The vial was purged with argon and closed with a screw cap. The solution was stirred and irradiated with the violet LEDs (393 nm, 2 x 10 W) at rt for 40 h until the completion of the reaction, monitored by TLC. After the irradiation, the reaction solution was concentrated *in vacuo* to give a residue. The crude product was purified by column chromatography with 5% EtOAc–hexane to afford **2ab-H/D** ( $R_f = 0.36$  in 15% EtOAc–hexane; 16.1 mg, 75% yield) as a yellow solid.

Selected data for **2ab-H/D**: m.p.: 128–129 °C; IR (neat): 3064, 2990, 2933, 2221, 2071, 1682, 1592, 1446, 1244, 1180, 1093, 1025, 751, 700  $\text{cm}^{-1}$ ;  $^1\text{H}$  NMR (500 MHz,  $\text{CDCl}_3$ ):  $\delta$  7.87 – 7.82 (m, 2 H), 7.41 – 7.37 (m, 1 H), 7.31 – 7.24 (m, 7 H), 4.74 – 4.70 (m, 0.21 H), 2.53 – 2.46 (m, 0.39 H), 2.07 – 2.00 (m, 0.34 H), 1.77 – 1.75 (d,  $J = 2.9$  Hz, 0.26 H), 1.64 (d,  $J = 0.8$  Hz, 2.02 H); For major isomer:  $^1\text{H}$  NMR (500 MHz, Chloroform- $d$ ):  $\delta$  7.87 – 7.82 (m, 2 H), 7.41 – 7.36 (m, 1 H), 7.31 – 7.24 (m, 7 H), 1.64 (s, 3 H);  $^{13}\text{C}$  NMR (125 MHz,  $\text{CDCl}_3$ ):  $\delta$  208.0 – 207.6 (m, C), 198.9 (C), 137.6 (C), 134.4 (C), 132.4 (CH), 131.0 (two CH), 128.7 (two CH), 128.4 (CH), 127.8 (two CH), 125.5 (two CH), 109.1 (C), 93.6 (d,  $J = 6$  Hz, C), 57.3 – 57.1 (m, CD), 49.3 – 48.2 (m,  $\text{CD}_3$ ), 41.14 – 40.28 (m,  $\text{CD}_2$ ), 31.3 – 30.3 (m,  $\text{CD}_3$ ), 20.5 ( $\text{CH}_3$ ); HRMS (GC-EI-TOF)  $m/z$ :  $[\text{M}]^+$  Calcd for  $\text{C}_{21}\text{H}_{13}\text{O}_4\text{D}_9$  347.2083; found 347.2080.

### Preparation of **3a** from **2aa**:

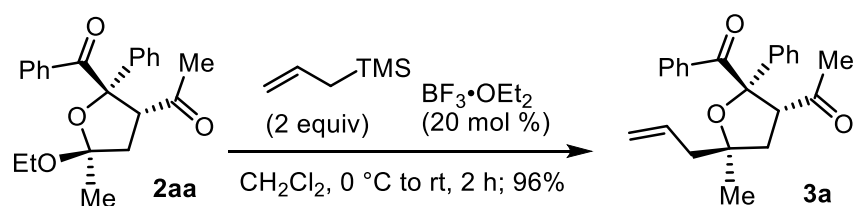

A solution of **2aa** (20 mg, 0.06 mmol) in  $\text{CH}_2\text{Cl}_2$  (1.1 mL) was cooled to  $0^\circ\text{C}$ . Allyl trimethylsilane (13 mg, 0.11 mmol, 2.0 equiv) and boron trifluoride etherate (1.6 mg, 0.01 mmol, 0.2 equiv) were then added sequentially. The reaction mixture was stirred at room temperature for 2 h. After completion, the reaction was quenched with saturated aqueous  $\text{NaHCO}_3$  solution and extracted with  $\text{CH}_2\text{Cl}_2$  ( $2 \times 5$  mL). The combined organic layers were dried over  $\text{Na}_2\text{SO}_4$ , and concentrated *in vacuo* to give a residue. The crude product was purified by flash column chromatography with 5% EtOAc–hexane as eluent to afford **3a** ( $R_f = 0.38$  in 15% EtOAc–hexane; 18.9 mg, 96%) as a pale-yellow oil.

Selected data for **3a**: IR (neat): 3066, 2974, 2932, 1712, 1678, 1593, 1446, 1357, 1242, 1178, 1042, 918, 755, 701  $\text{cm}^{-1}$ ;  $^1\text{H}$  NMR (500 MHz,  $\text{CDCl}_3$ ):  $\delta$  7.92 – 7.88 (m, 2 H), 7.42 – 7.37 (m, 1 H), 7.31 – 7.19 (m, 7 H), 5.41 – 5.32 (m, 1 H), 4.85 – 4.74 (m, 2 H), 4.64 (t,  $J = 8.0$  Hz, 1 H), 2.35 (dd,  $J = 13.0, 8.0$  Hz, 1 H), 2.07 – 2.00 (m, 1 H), 1.98 – 1.90 (m, 2 H), 1.79 (s, 3 H), 1.53 (s, 3 H);  $^{13}\text{C}$  NMR (125 MHz,  $\text{CDCl}_3$ ):  $\delta$  207.3 (C), 199.8 (C), 138.8 (C), 134.2 (C), 133.8 (CH), 132.7 (CH), 131.4 (two CH), 128.6 (two CH), 128.2 (CH), 127.9 (two CH), 125.5 (two CH), 117.9 ( $\text{CH}_2$ ), 94.0 (C), 85.6 (C), 58.0 (CH), 45.7 ( $\text{CH}_2$ ), 39.0 ( $\text{CH}_2$ ), 31.2 ( $\text{CH}_3$ ), 25.6 ( $\text{CH}_3$ ); HRMS (GC-EI-TOF)  $m/z$ :  $[\text{M}]^+$  Calcd for  $\text{C}_{23}\text{H}_{24}\text{O}_3$  348.1725; found 348.1723.

### Preparation of **3b** from **2aa**:

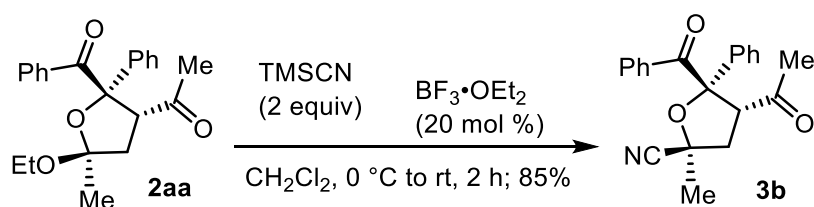

A solution of **2aa** (20 mg, 0.06 mmol) in  $\text{CH}_2\text{Cl}_2$  (1.1 mL) was cooled to  $0^\circ\text{C}$ . trimethylsilyl cyanide (11.3 mg, 0.11 mmol, 2.0 equiv) and boron trifluoride etherate (1.6 mg, 0.01 mmol, 0.2 equiv) were then added sequentially. The reaction mixture was stirred at room temperature for 2 h. After completion, the reaction was quenched with saturated aqueous  $\text{NaHCO}_3$  solution and extracted with  $\text{CH}_2\text{Cl}_2$  ( $2 \times 5$  mL). The combined organic layers were dried over  $\text{Na}_2\text{SO}_4$ , and concentrated *in vacuo* to give a

residue. The crude product was purified by flash column chromatography with 5-10% EtOAc–hexane as eluent to afford **3b** ( $R_f$  = 0.32 in 15% EtOAc–hexane; 16.1 mg, 85% yield) as a pale-yellow oil.

Selected data for **3b**: IR (neat): 3065, 2990, 2928, 2857, 1714, 1681, 1593, 1446, 1360, 1242, 1178, 1112, 1033, 898, 754, 704  $\text{cm}^{-1}$ ;  $^1\text{H}$  NMR (500 MHz,  $\text{CDCl}_3$ ):  $\delta$  7.88 – 7.84 (m, 2 H), 7.47 – 7.42 (m, 1 H), 7.34 – 7.23 (m, 7 H), 4.76 (t,  $J$  = 7.5 Hz, 1 H), 2.62 (dd,  $J$  = 13.4, 7.5 Hz, 1 H), 2.46 (dd,  $J$  = 13.4, 7.5 Hz, 1 H), 1.91 (s, 3 H), 1.78 (s, 3 H);  $^{13}\text{C}$  NMR (125 MHz,  $\text{CDCl}_3$ ):  $\delta$  206.0 (C), 197.5 (C), 136.4 (C), 133.6 (C), 133.3 (CH), 131.2 (two CH), 129.01 (CH), 128.95 (two CH), 128.1 (two CH), 125.3 (two CH), 120.3 (C), 95.5 (C), 75.9 (C), 57.1 (CH), 40.6 ( $\text{CH}_2$ ), 31.1 ( $\text{CH}_3$ ), 25.5 ( $\text{CH}_3$ ); HRMS (GC-EI-TOF)  $m/z$ :  $[\text{M}]^+$  Calcd for  $\text{C}_{21}\text{H}_{19}\text{NO}_3$  333.1365; found 333.1360.

### Preparation of **2aa** (1.0 mmol scale):

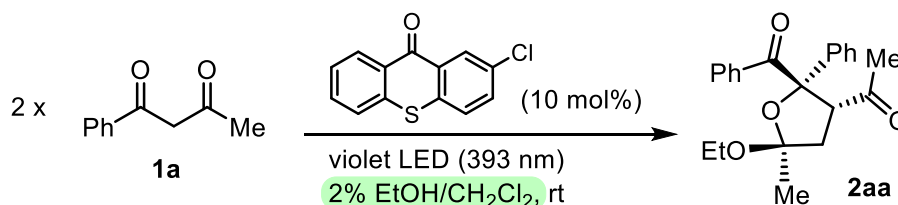

A magnetic stirring bar and 1-phenylbutane-1,3-dione (**1a**, 162.2 mg, 1.0 mmol) were placed in a 12-mL sample vial, followed by the addition of 2-chloro-9H-thioxanthen-9-one (24.7 mg, 0.1 mmol, 0.1 equiv) in 2% ethanol/ $\text{CH}_2\text{Cl}_2$  (10 mL). The vial was purged with argon and closed with a screw cap. The solution was stirred and irradiated with the violet LEDs (393 nm, 2 x 10 W) at rt for 48 h until the completion of the reaction, monitored by TLC. After the irradiation, the reaction solution was concentrated *in vacuo* to give a residue. The crude product was purified by column chromatography with 5% EtOAc–hexane to afford **2aa** ( $R_f$  = 0.44 in 20% EtOAc–hexane; 126.8 mg, 72% yield) as a yellow solid.

### The light on/off experiment:

A 7-mL sample vial was charged with a magnetic stirring bar and compound **1a** (100 mg, 0.62 mmol), followed by the addition of 2-chloro-9H-thioxanthen-9-one (**I**, 15.2 mg, 0.06 mmol, 0.1 equiv) and 2%  $\text{CH}_3\text{OH}/\text{CH}_2\text{Cl}_2$  (6.2 mL). The vial was purged with argon and sealed with a screw cap. The resulting solution was subjected to stirring and irradiated with violet LEDs (393 nm, 2 x 10 W) at room temperature. After the specified reaction time, an aliquot (~50  $\mu\text{L}$ ) of the reaction mixture was withdrawn, diluted with  $\text{CDCl}_3$ , and analyzed by  $^1\text{H}$  NMR, with 1,3,5-trimethylbenzene employed as an internal standard.

**Control experiment (radical trapping reaction with TEMPO):**

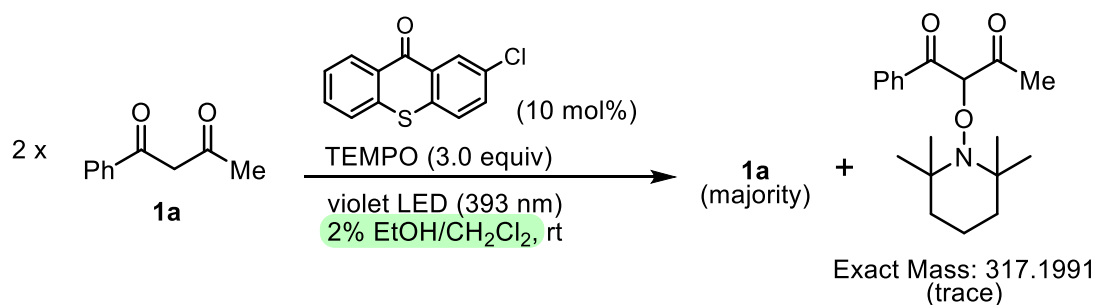

A magnetic stirring bar and **1a** (20 mg, 0.12 mmol) were placed in a 4-mL sample vial, followed by the addition of 2-chloro-9H-thioxanthen-9-one (3.0 mg, 0.01 mmol, 0.1 equiv) and TEMPO (57.8 mg, 0.37 mmol, 3.0 equiv) in 2% EtOH/CH<sub>2</sub>Cl<sub>2</sub> (1.2 mL). The vial was purged with argon and closed with a screw cap. The solution was stirred and irradiated with a violet LED (393 nm, 2 x 10 W) at rt for 48 h. The reaction was monitored by TLC, showing that approximately 80-90% of the starting compound **1a** remained unreacted. No detectable production of **2aa** was observed, and the reaction appeared to be inhibited, with the majority of **1a** remaining unreacted. After the irradiation, the reaction solution was concentrated *in vacuo* to give a residue. HRMS (GC-EI-TOF) analysis of the crude reaction mixture revealed an ion at  $m/z$  [M]<sup>+</sup> 317.1984, consistent with the molecular formula C<sub>19</sub>H<sub>27</sub>NO<sub>3</sub>, which gives a calculated value of  $m/z$  317.1991. The molecular weight of **1a** (C<sub>10</sub>H<sub>10</sub>O<sub>2</sub>) minus one hydrogen atom plus TEMPO, *i.e.*, **1a**-TEMPO with the loss of a hydrogen atom, corresponds to this mass-to-charge ratio.

**Figure S4. Light-on/light-off intermittent experiment of 1a**

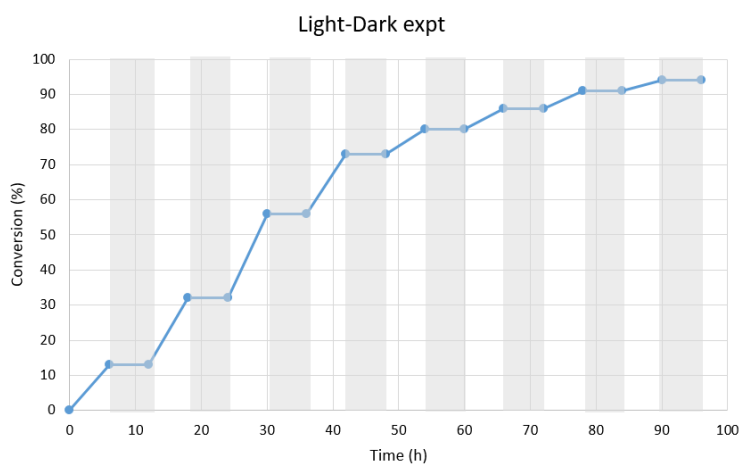

**Figure S5. Reaction Progress:**

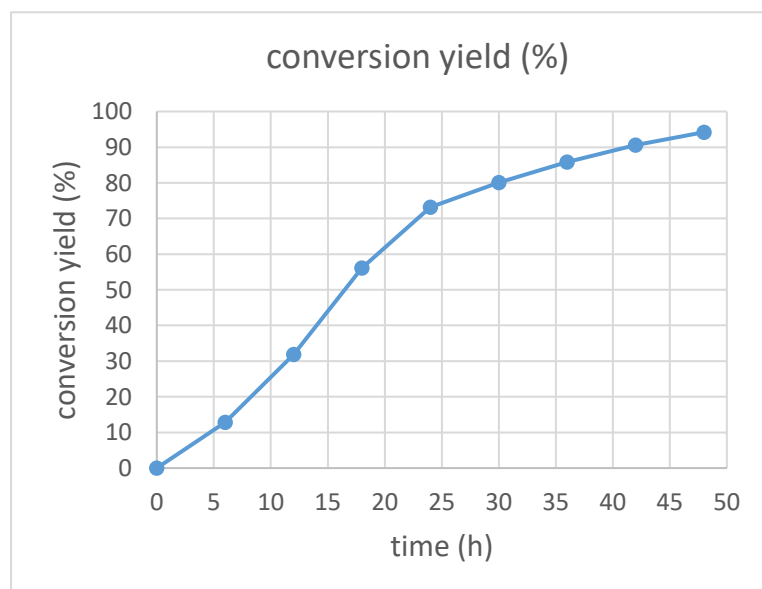

**Figure S6. UV-Vis spectra of 1a (IRR-140) in CH<sub>2</sub>Cl<sub>2</sub>.**

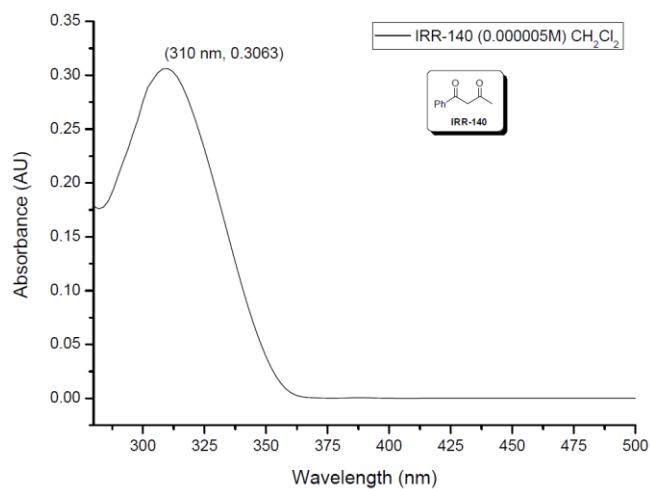

Figure S7. Emission spectra of **1a (IRR-140)** in  $\text{CH}_2\text{Cl}_2$  (irradiated at 390 nm).

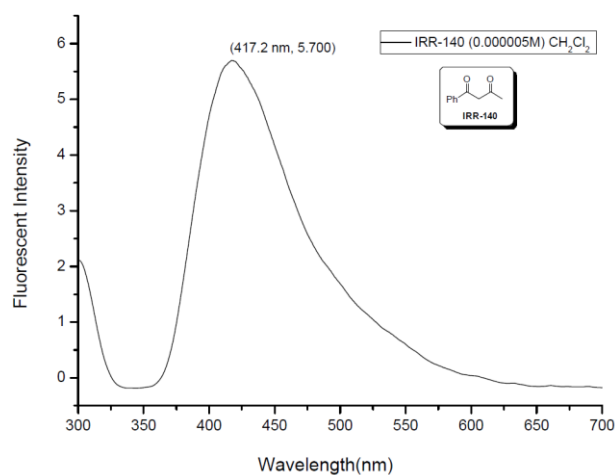

Figure S8. Emission spectra of **I (2-CITX)** in  $\text{CH}_2\text{Cl}_2$  (irradiated at 390 nm).

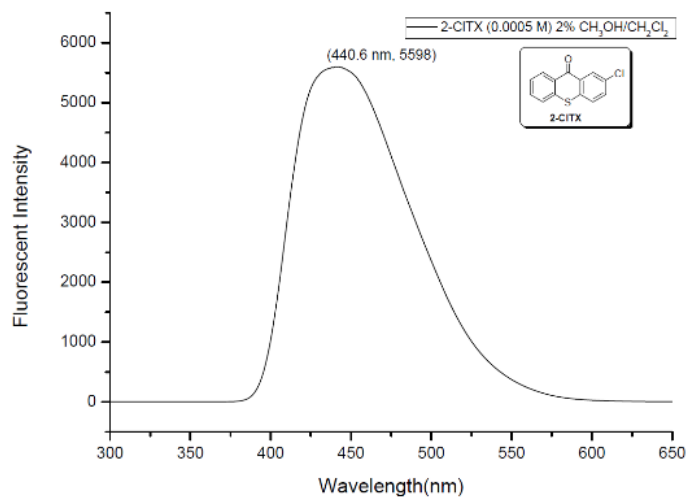

Figure S9. UV-Vis of **I (2-CITX)** in  $\text{CH}_2\text{Cl}_2$ .

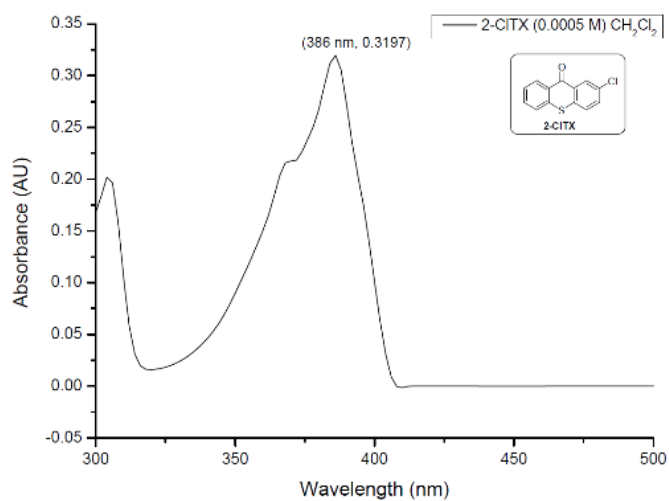

Figure S10. Stern-Volmer quenching of catalyst I (2-CITX) with 1a (IRR-140).

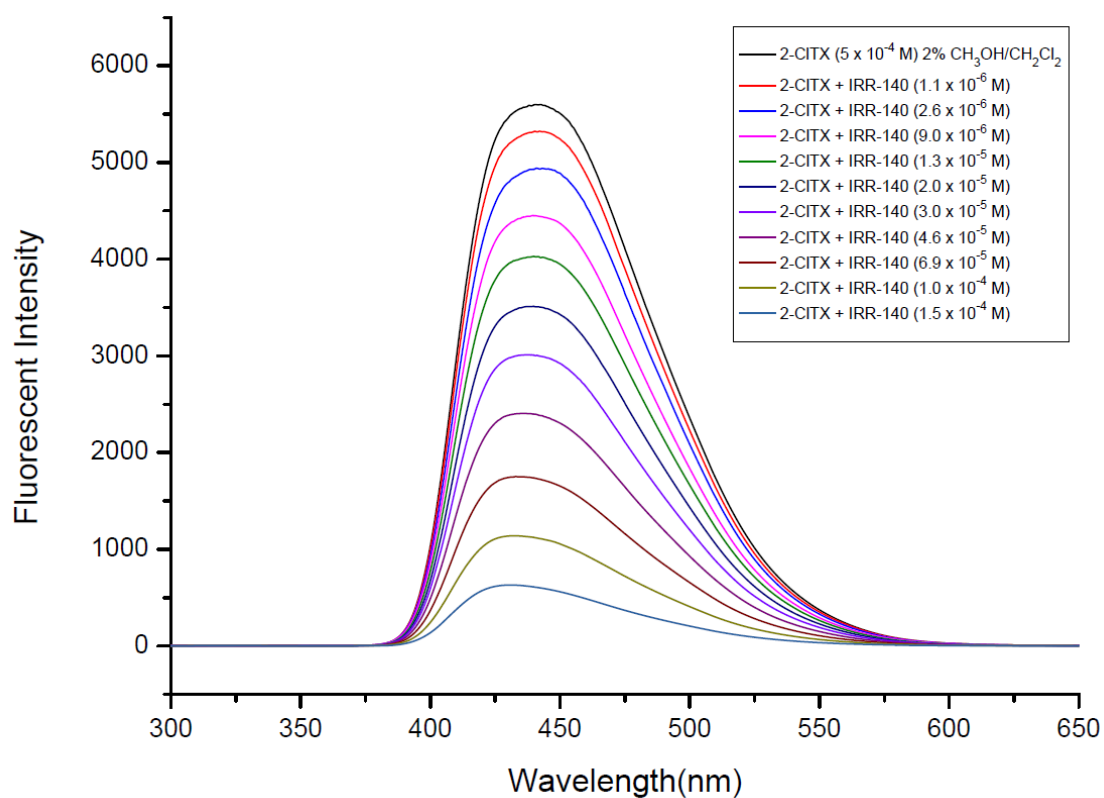

Figure S11. Fluorescence quenching (Stern-Volmer) plot of 1a (IRR-140) and I (2-CITX) in 2% CH<sub>3</sub>OH/CH<sub>2</sub>Cl<sub>2</sub>.

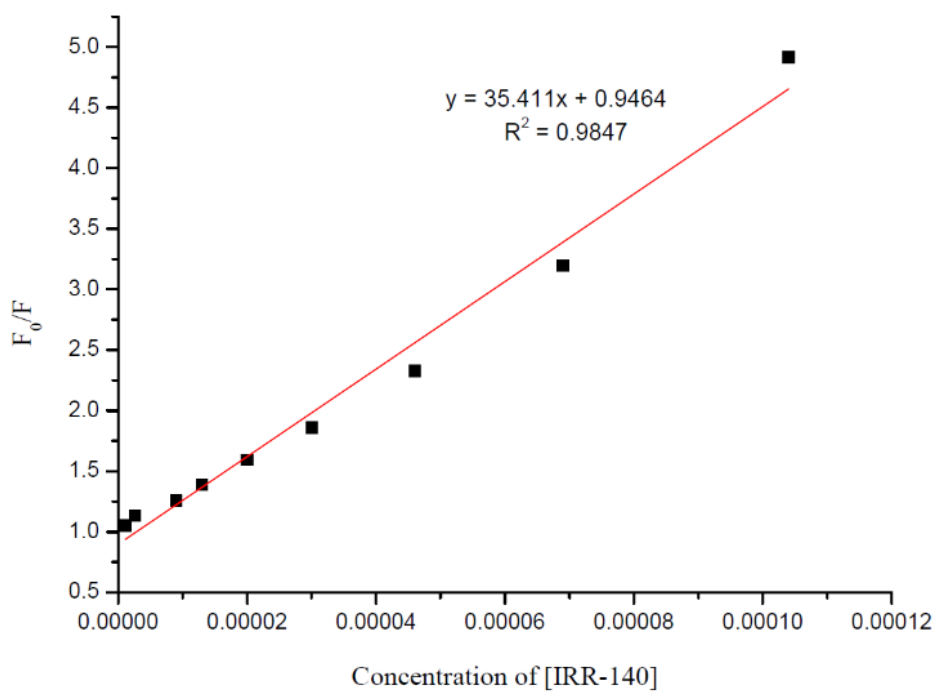

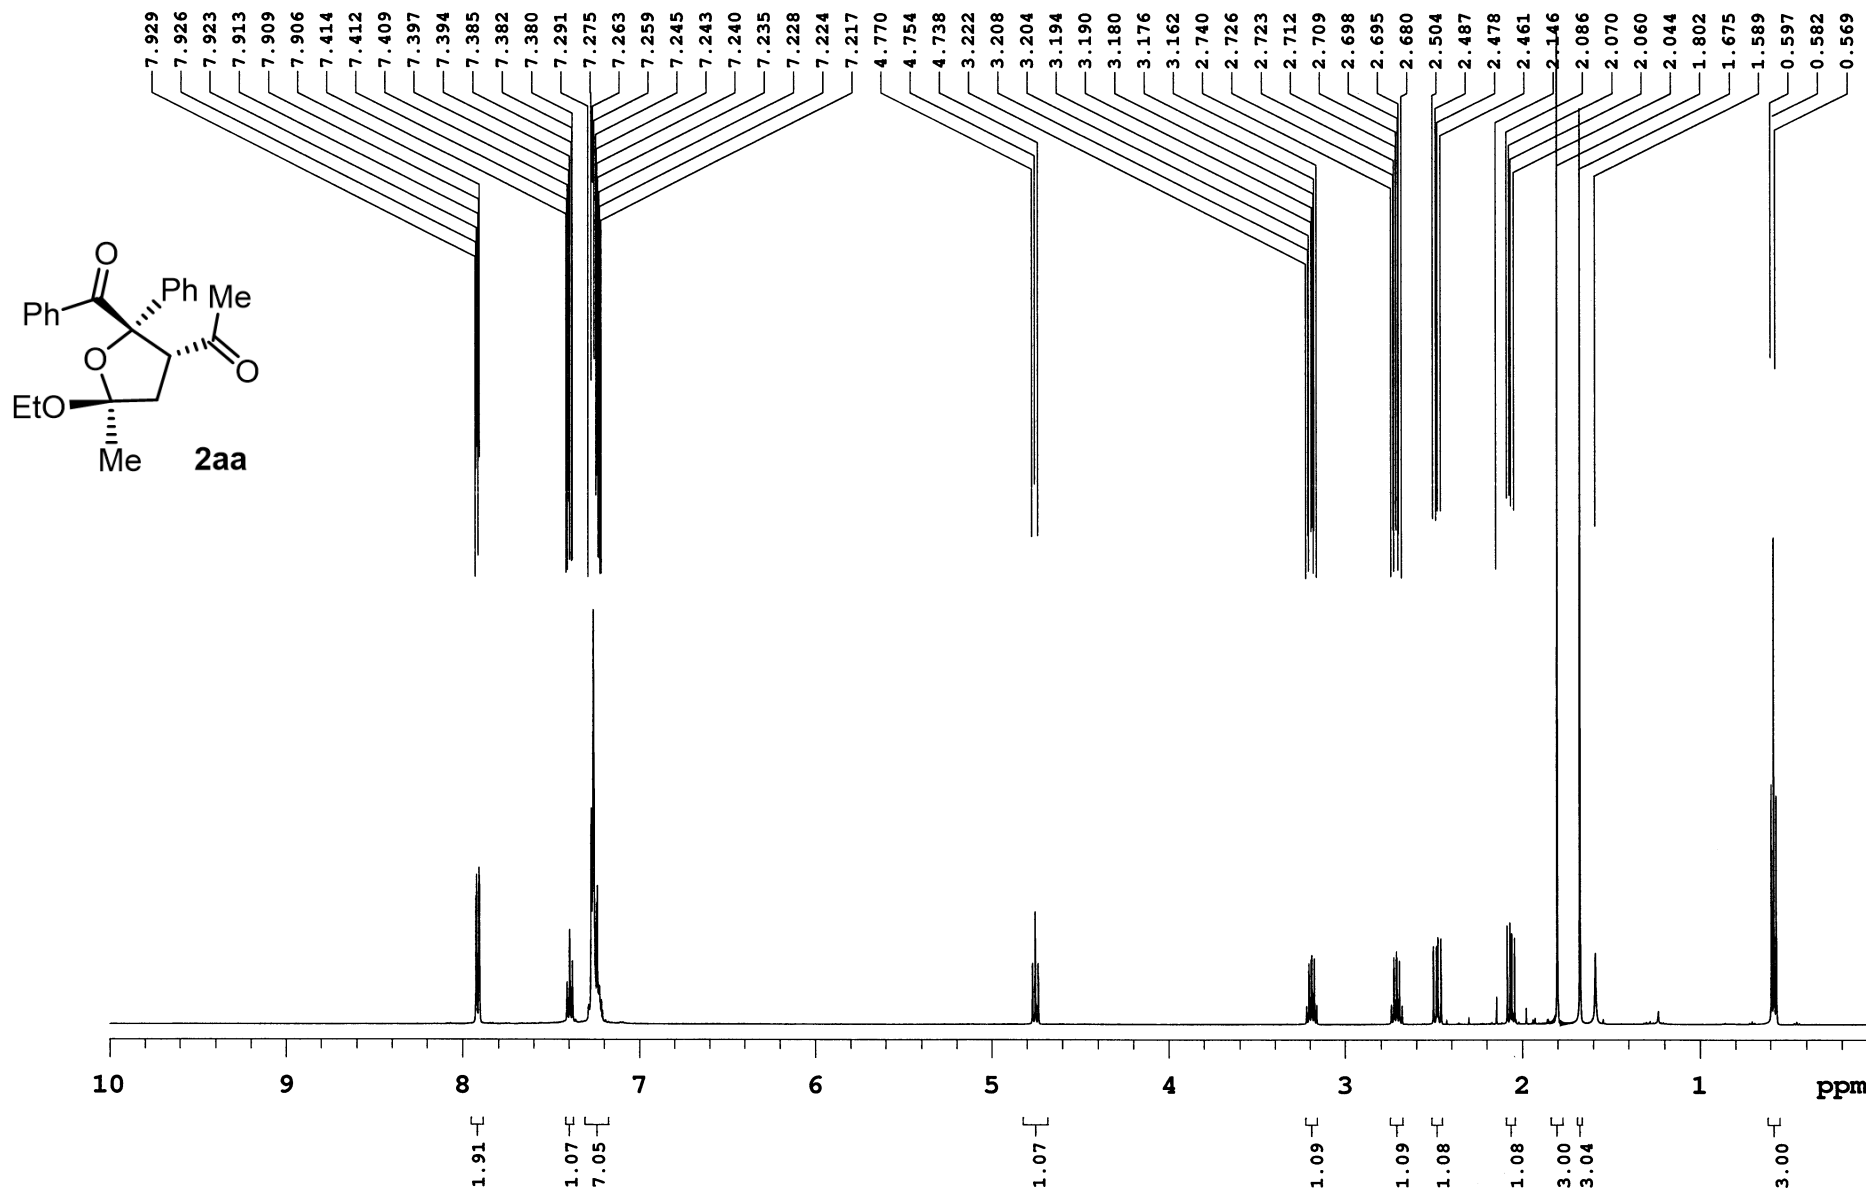



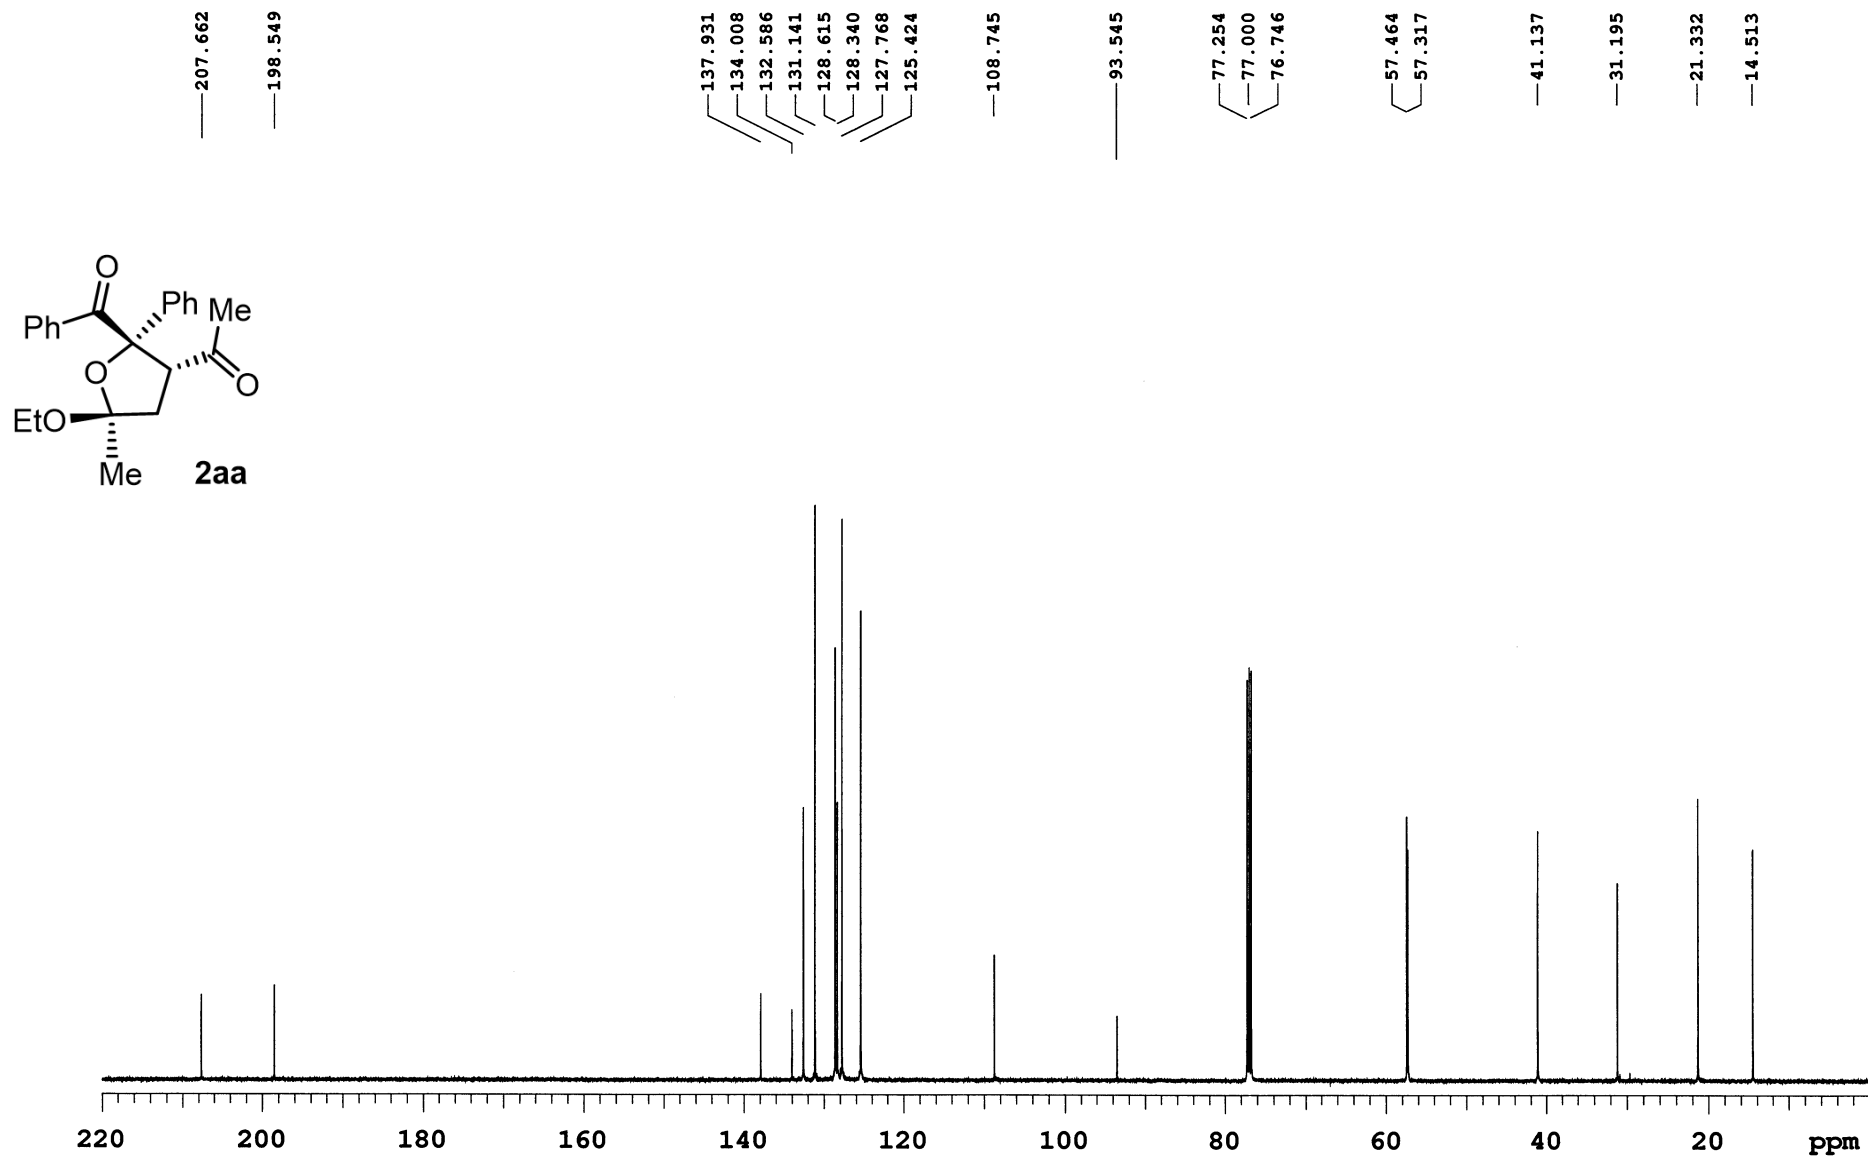13C NMR (125 MHz, CDCl<sub>3</sub>) of compound 2aa

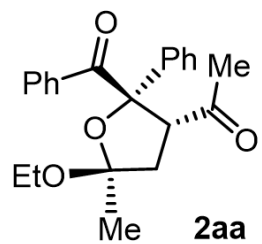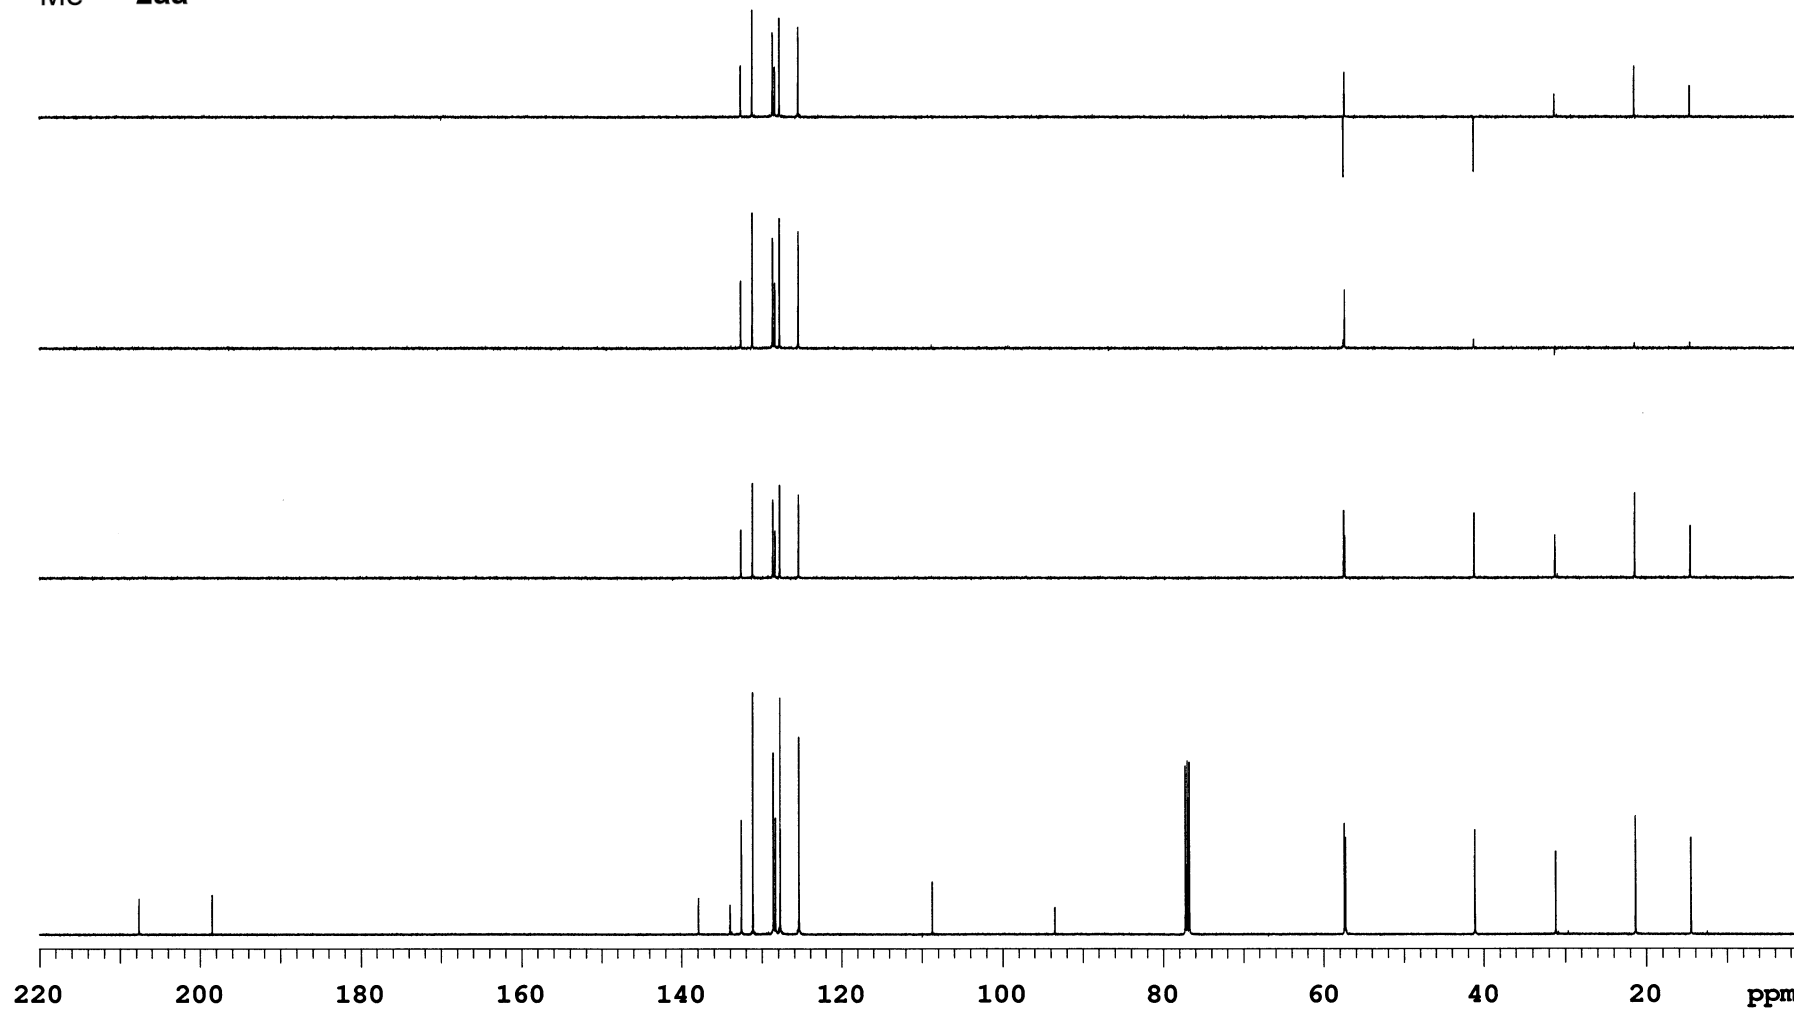

DEPT of compound 2aa

Sample Name **IRR-02-137**  
Date collected **2023-11-02**

Pulse sequence **gHSQC**  
Solvent **cdcl3**

Temperature **25**  
Spectrometer **Agilent-NMR-inova500**

Study owner **vnmr2**  
Operator **vnmr2**

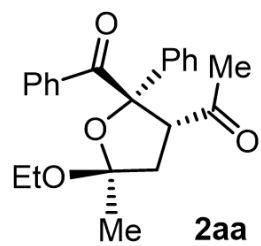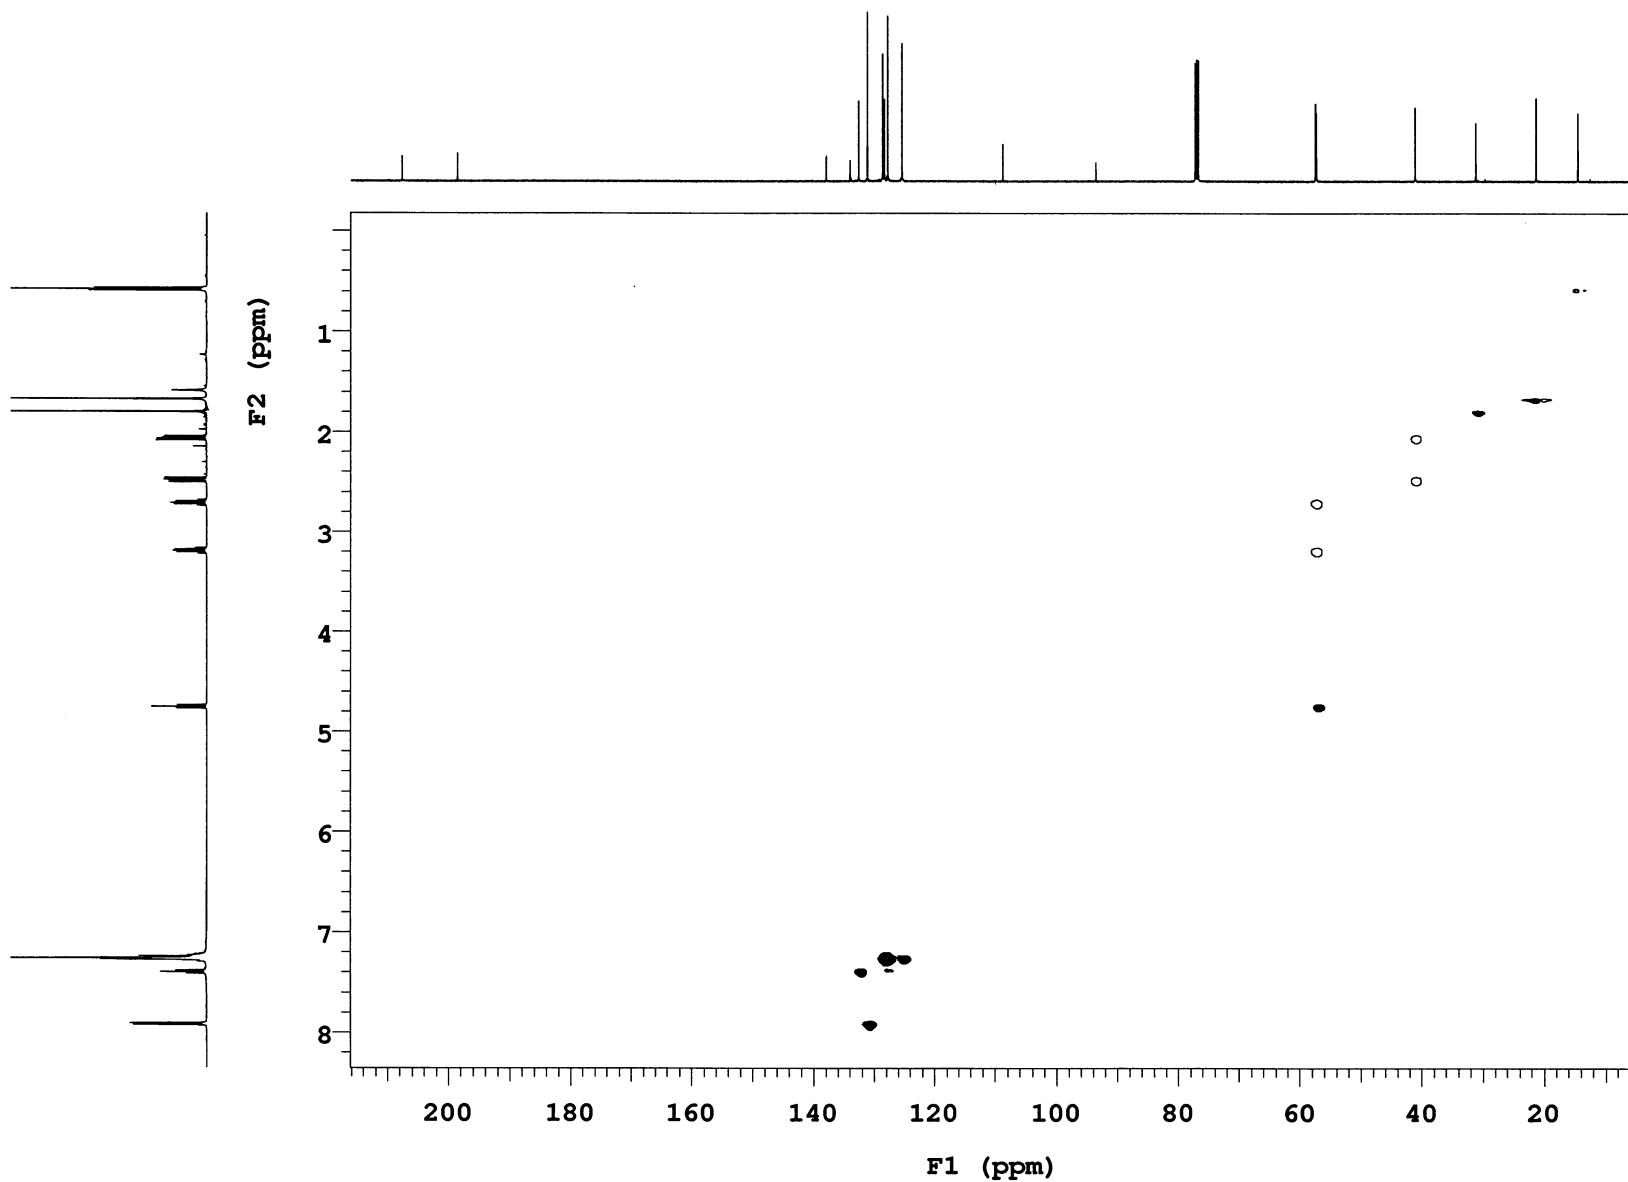

HSQC of compound 2aa

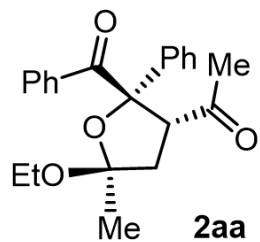

Sample Name **IRR-02-137**  
Date collected **2023-11-02**

Pulse sequence **gCOSY**  
Solvent **cdcl3**

Temperature **25**  
Spectrometer **Agilent-NMR-inova500**

Study owner **vnmr2**  
Operator **vnmr2**

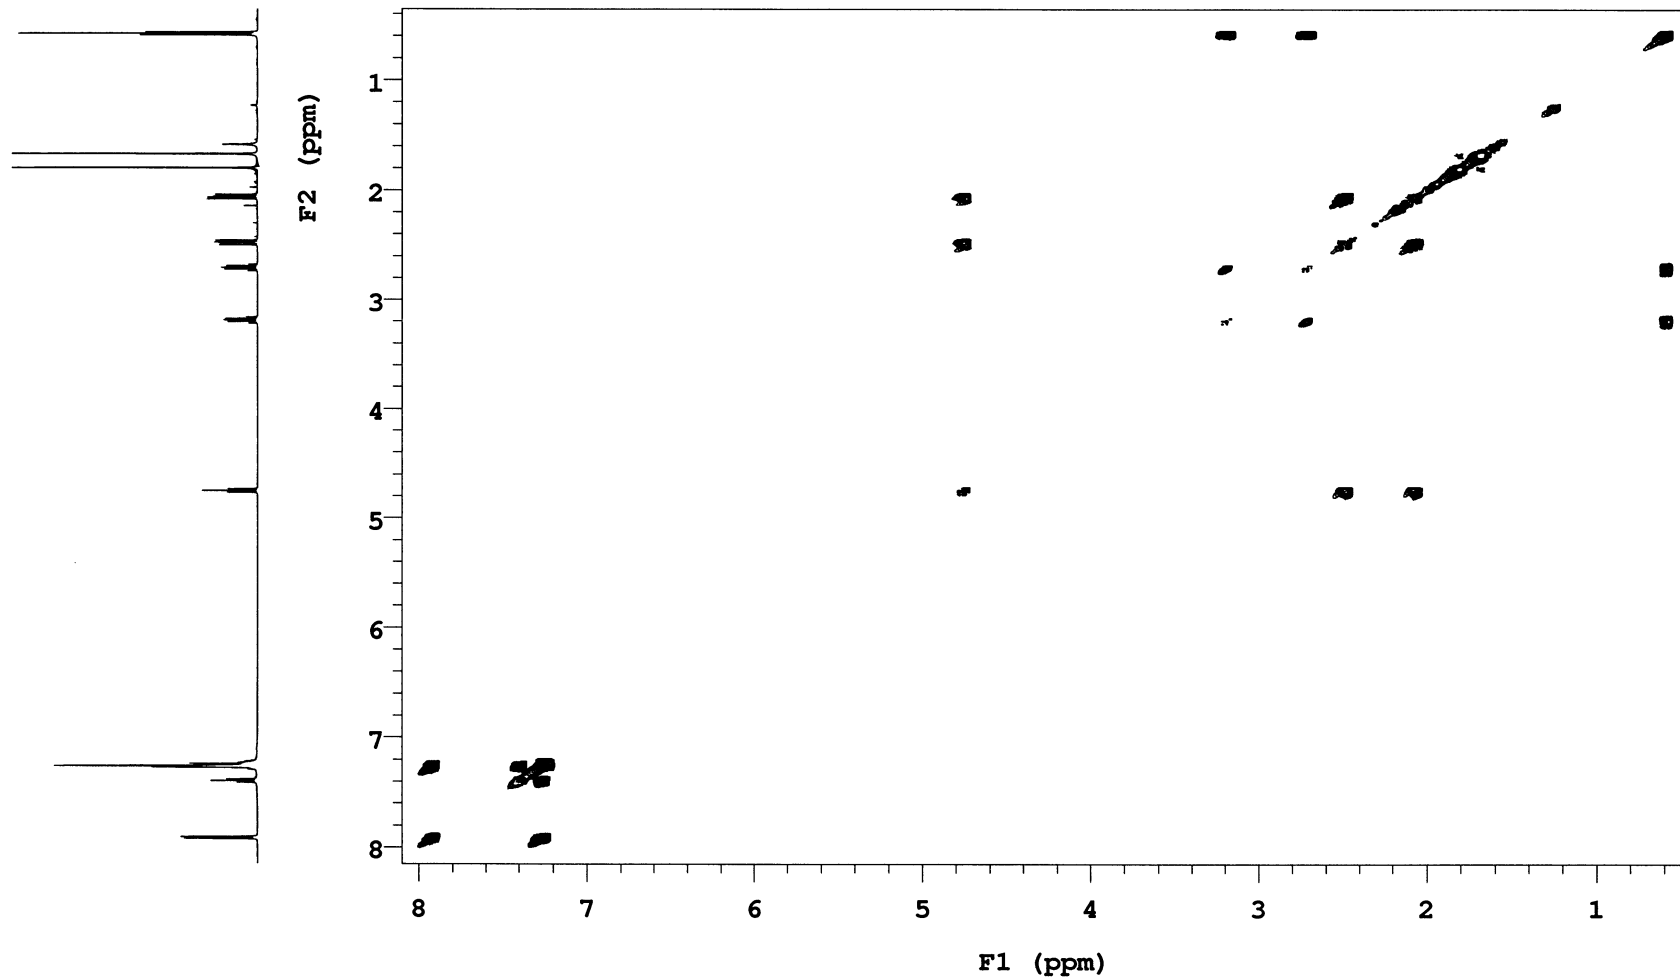

COSY of compound 2aa

IRR-02-137

Sample Name **IRR-02-137**  
Date collected **2023-11-02**Pulse sequence **NOESY**  
Solvent **cdcl3**Temperature **25**  
Spectrometer **Agilent-NMR-inova500**Study owner **vnmr2**  
Operator **vnmr2**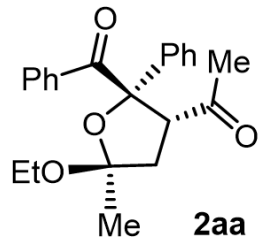**2aa**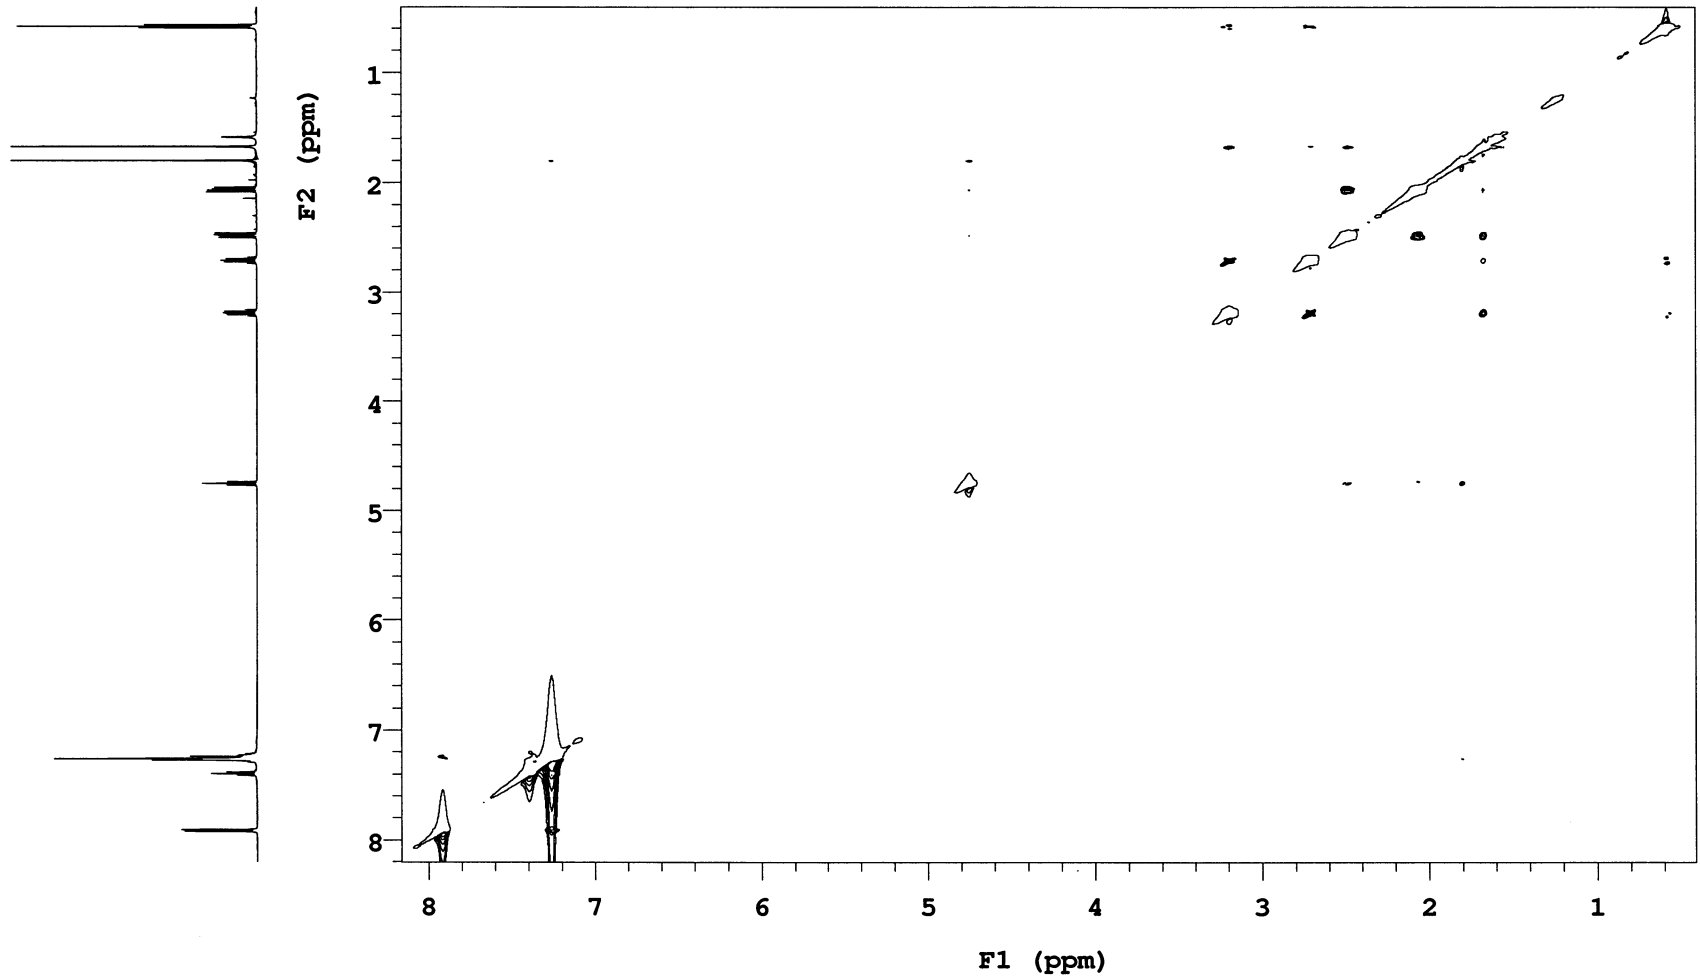

NOESY of compound 2aa

expanded HSQC of **2aa**

S38

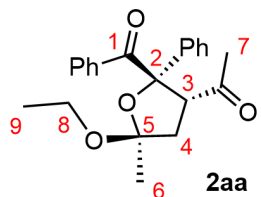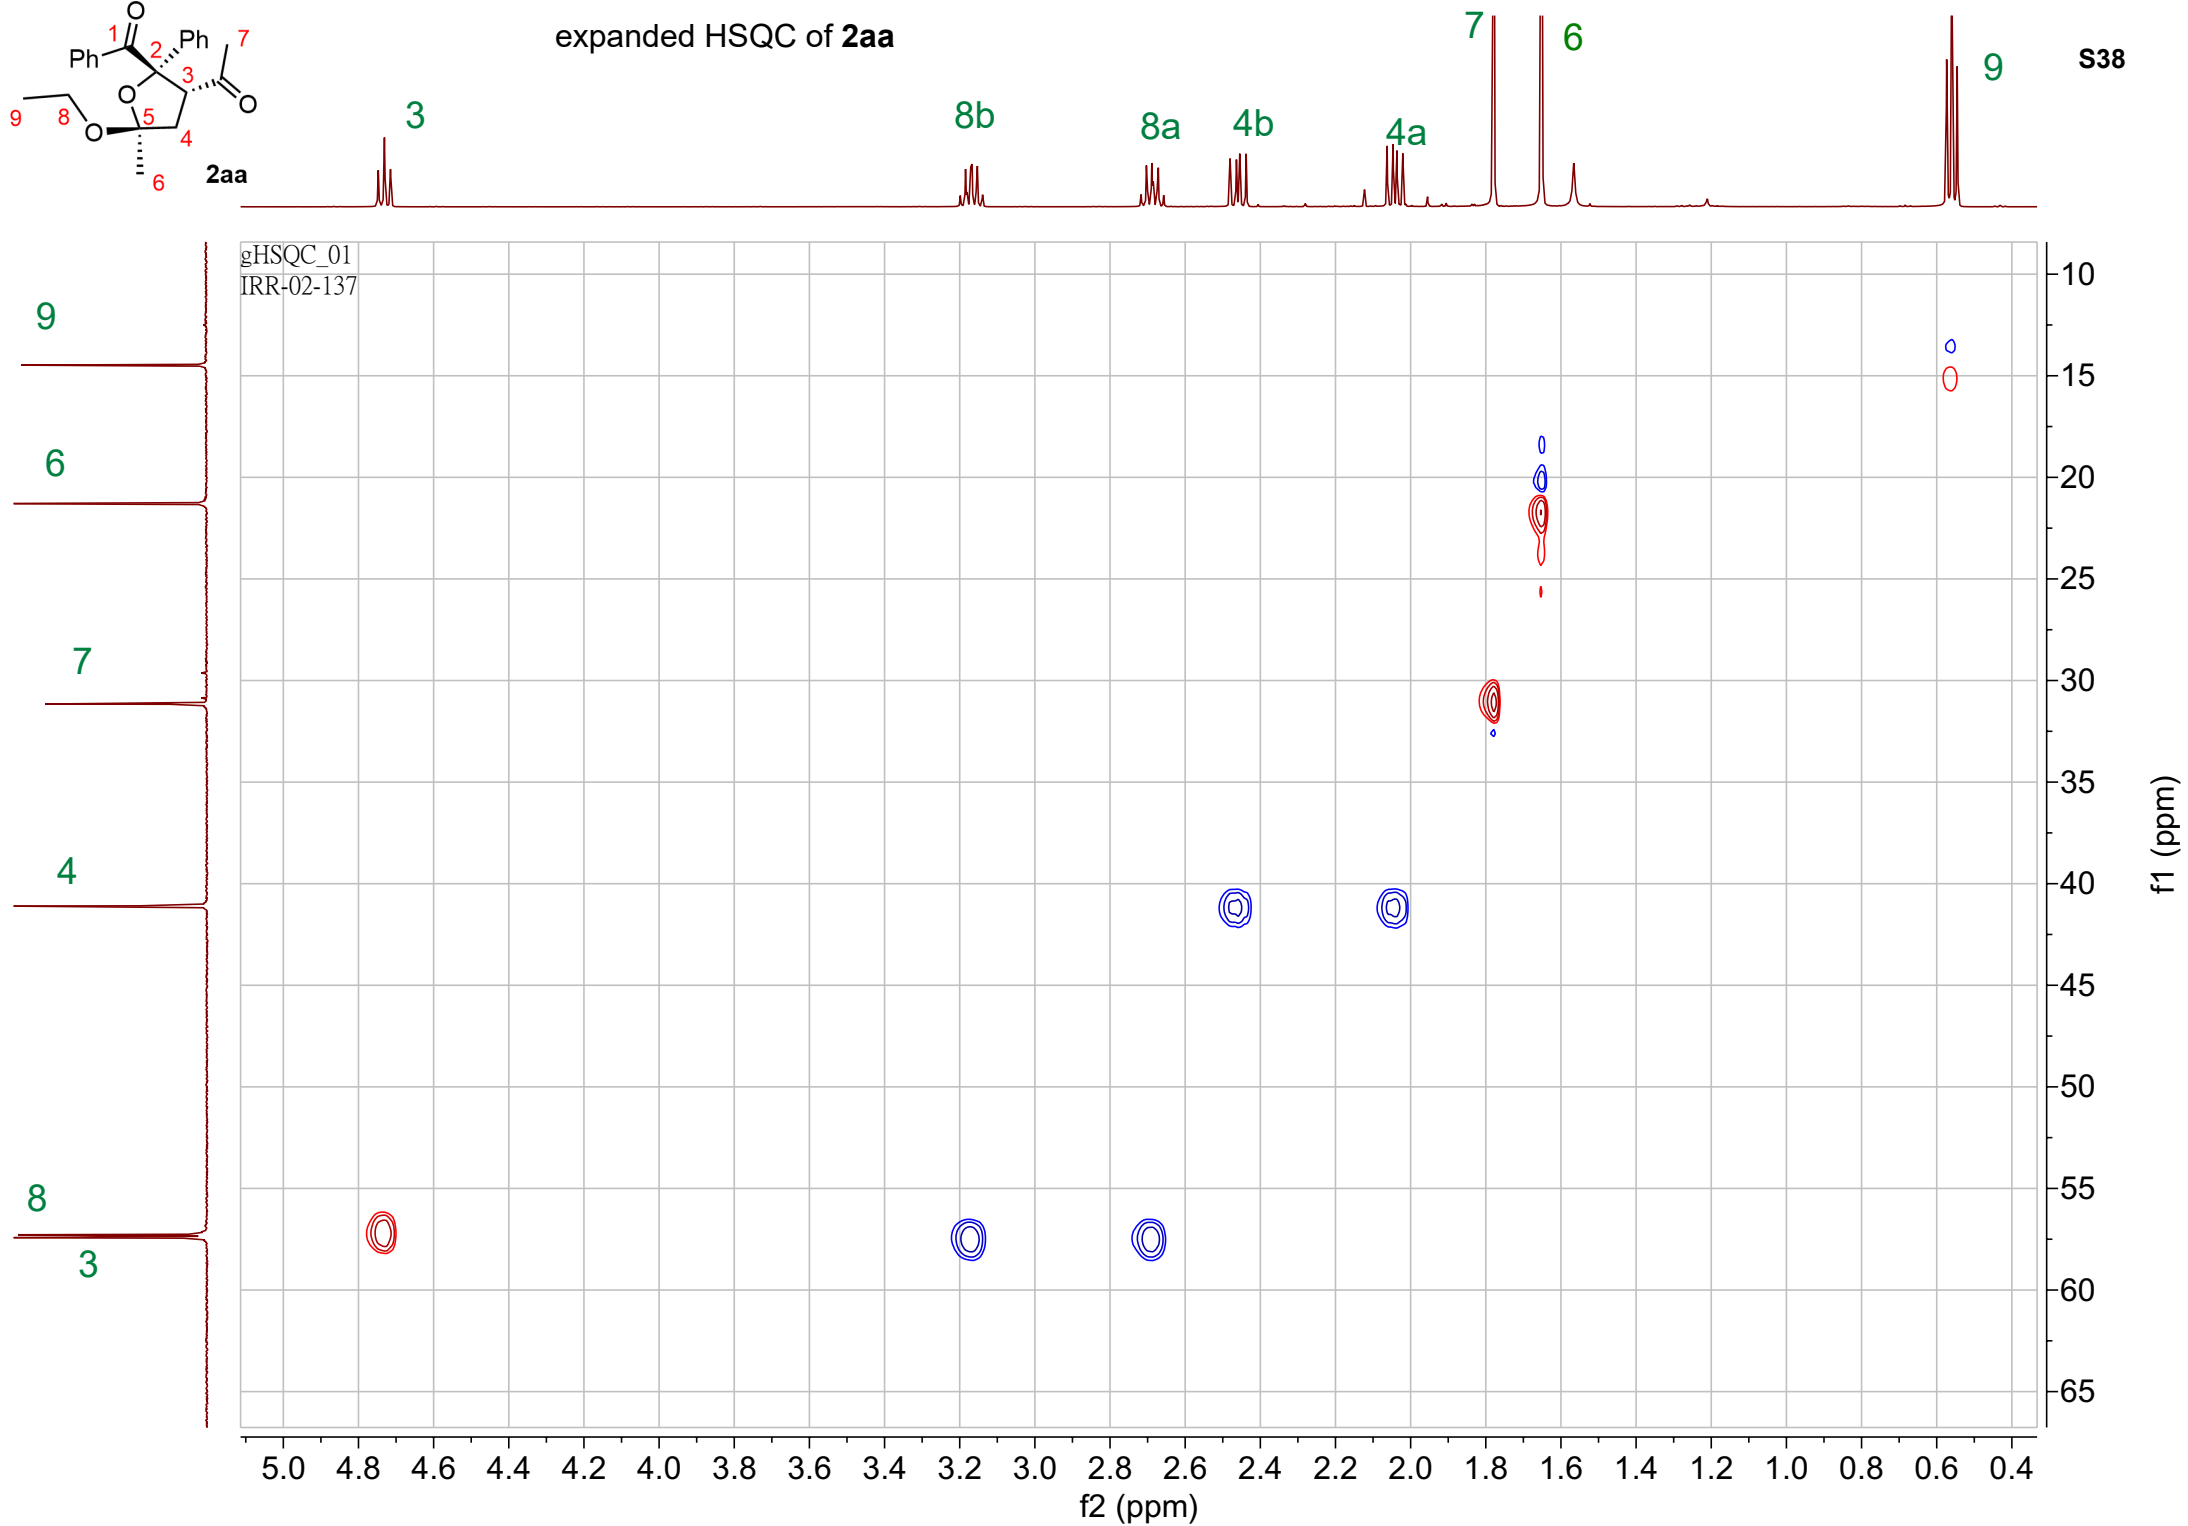

3 expanded COSY of 2aa

S39

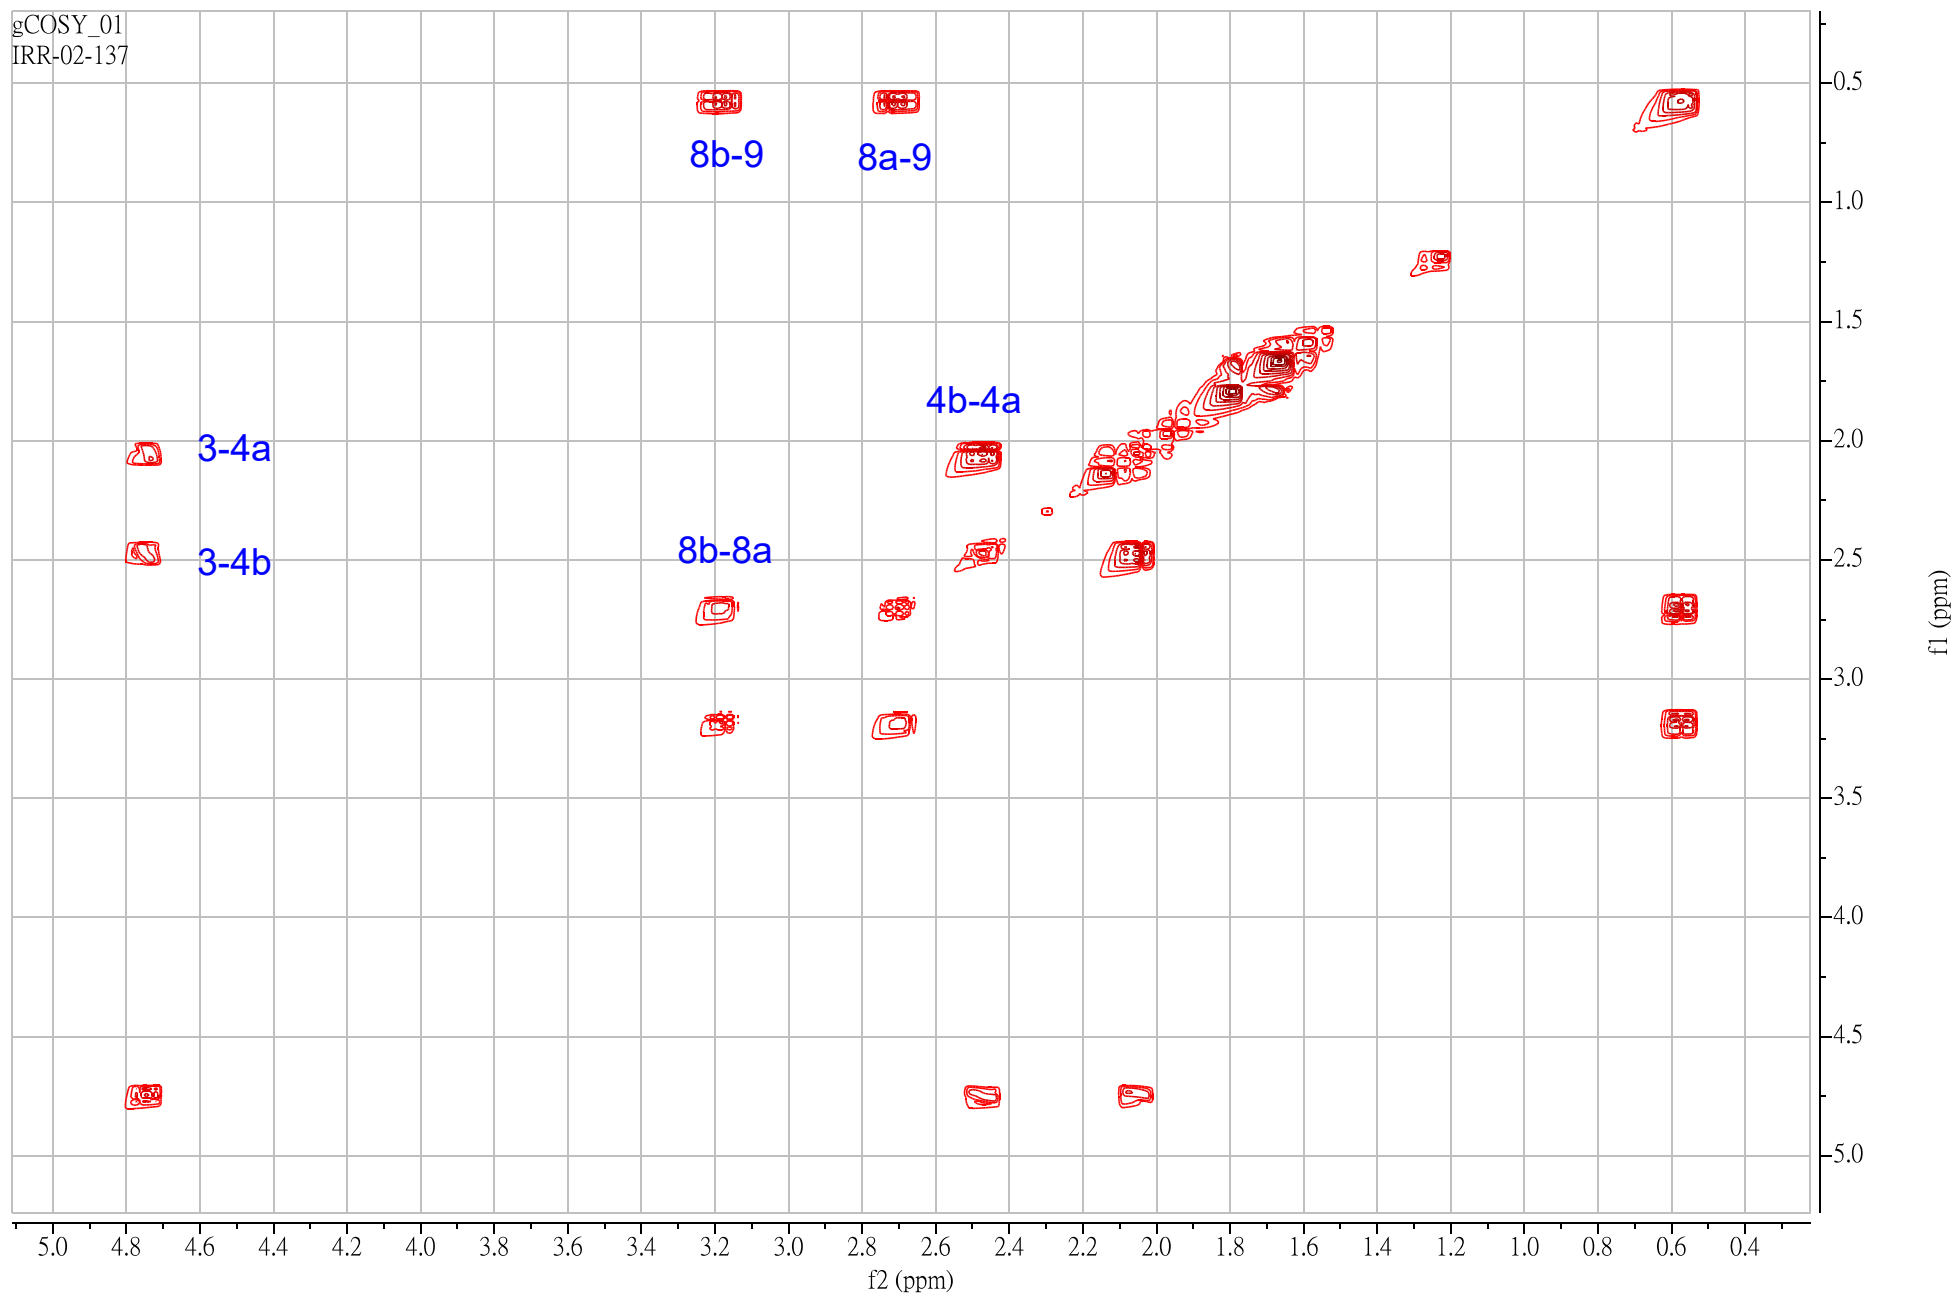

expanded NOESY of **2aa**

S40

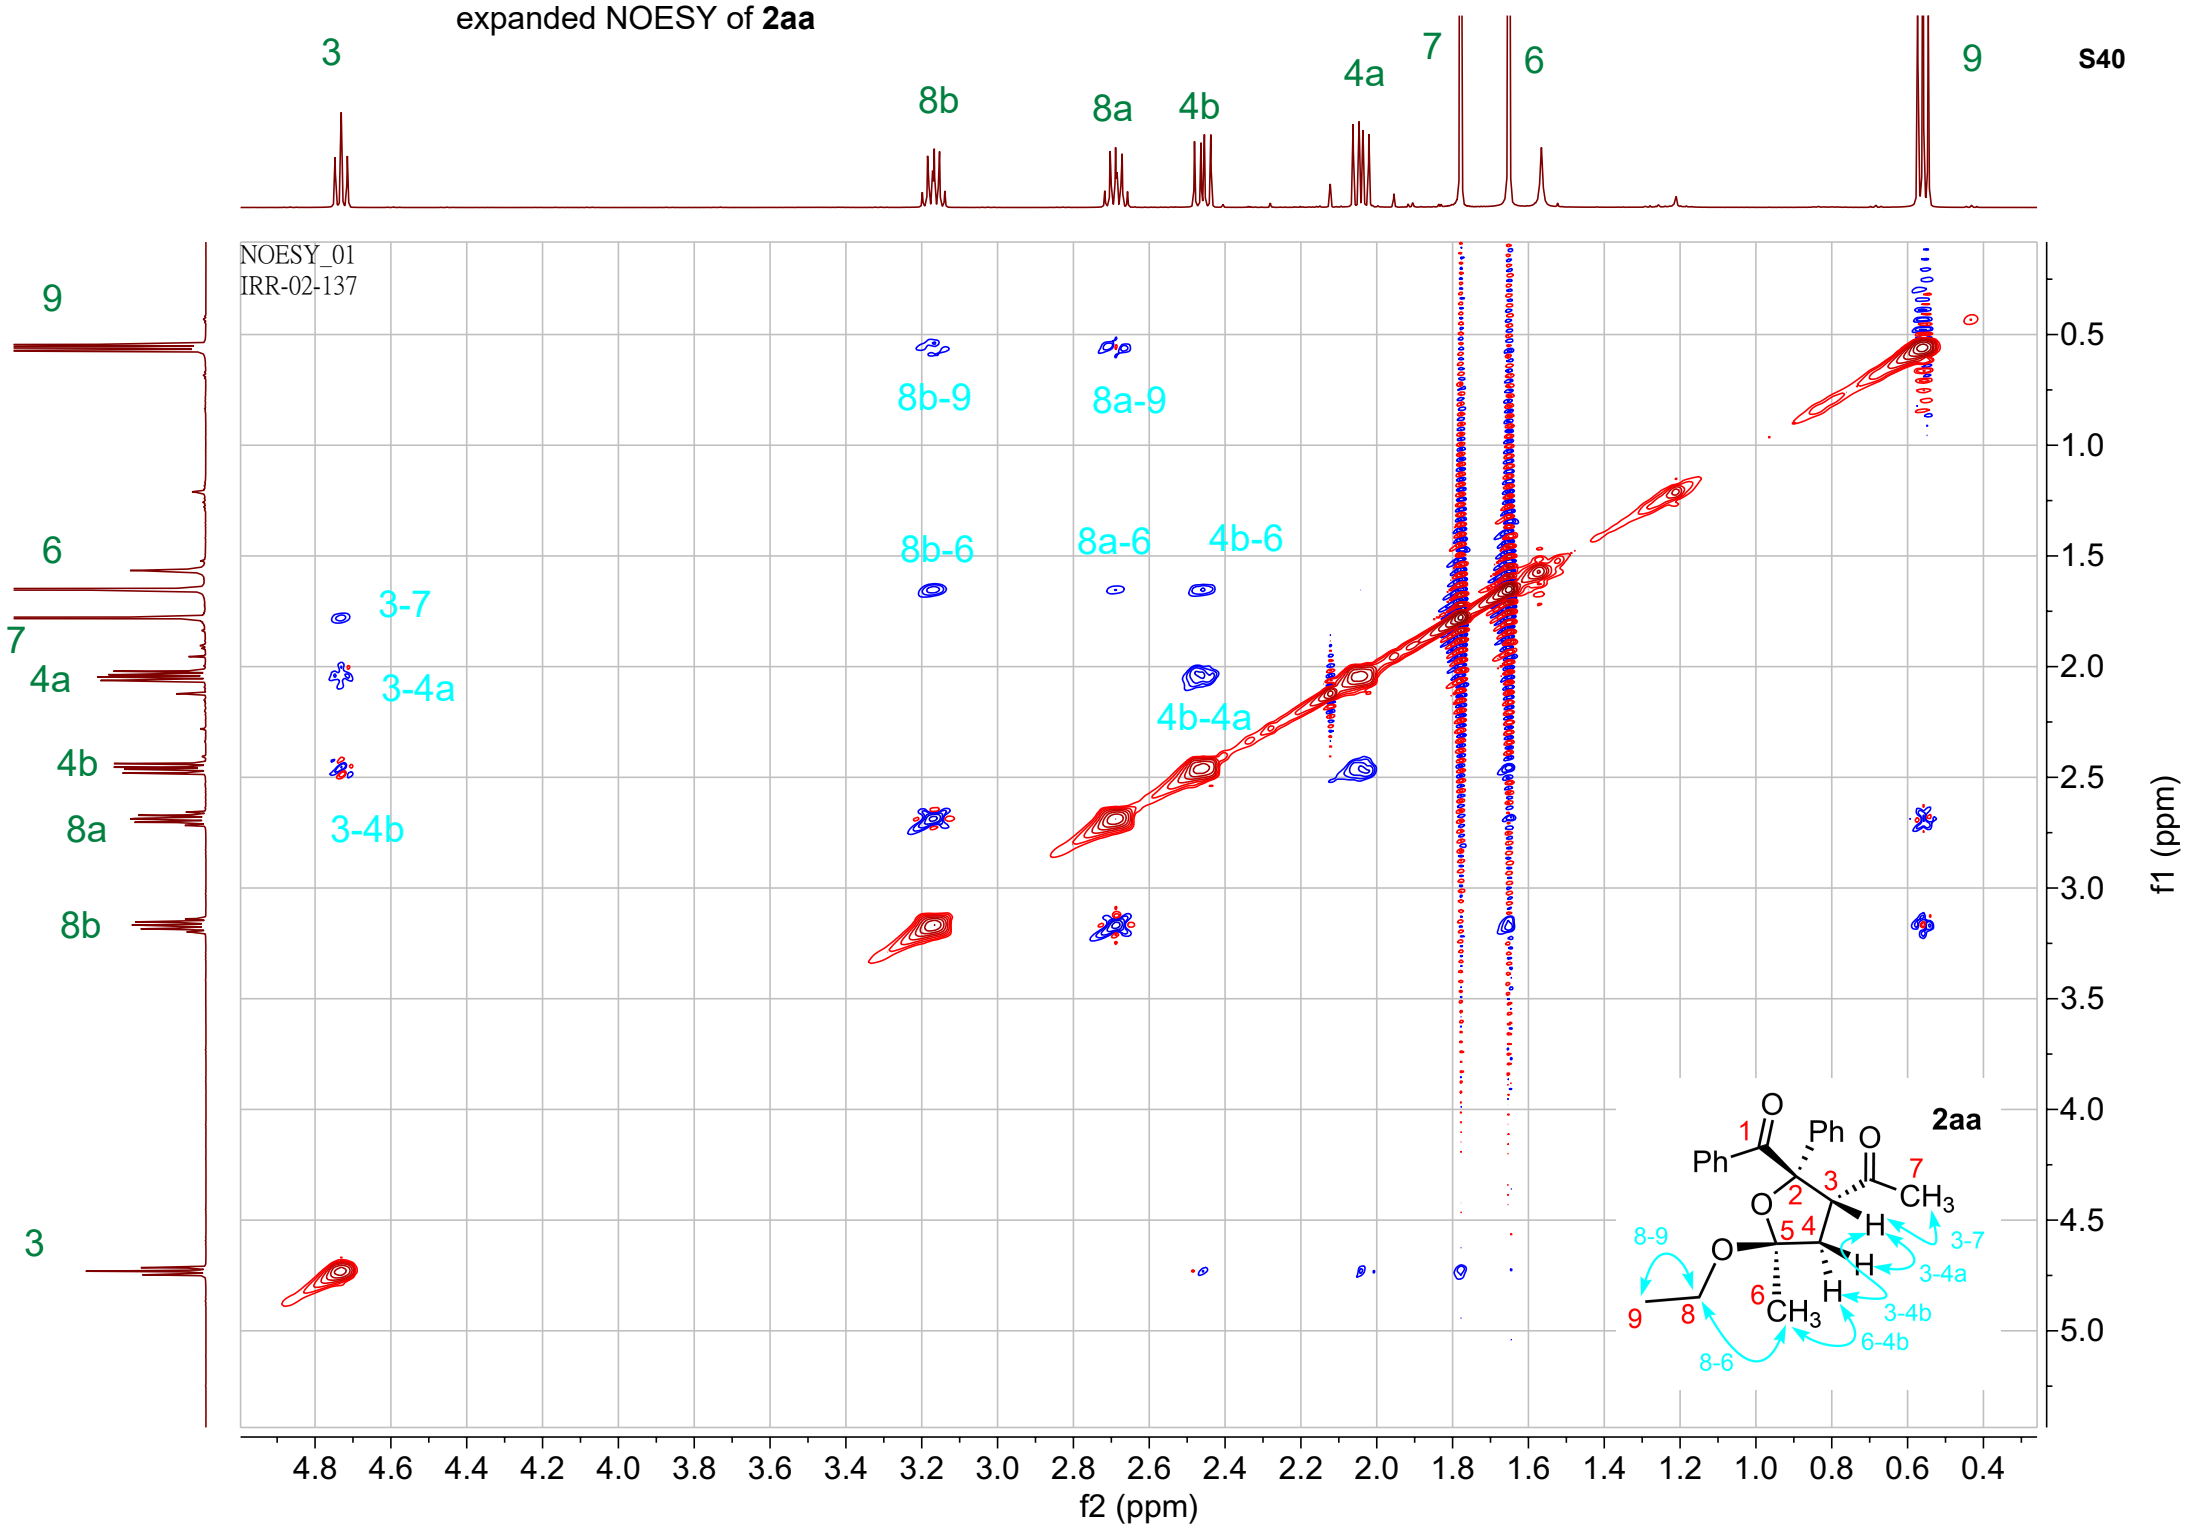



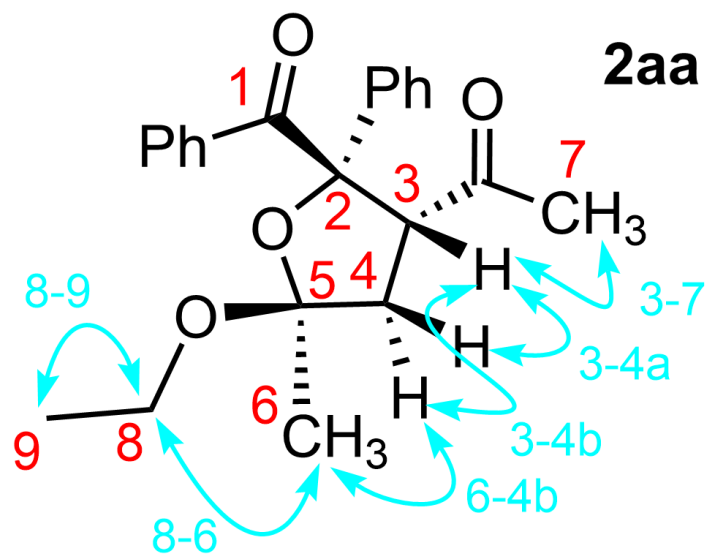Analysis of Data from the NOESY Spectrum of **2aa**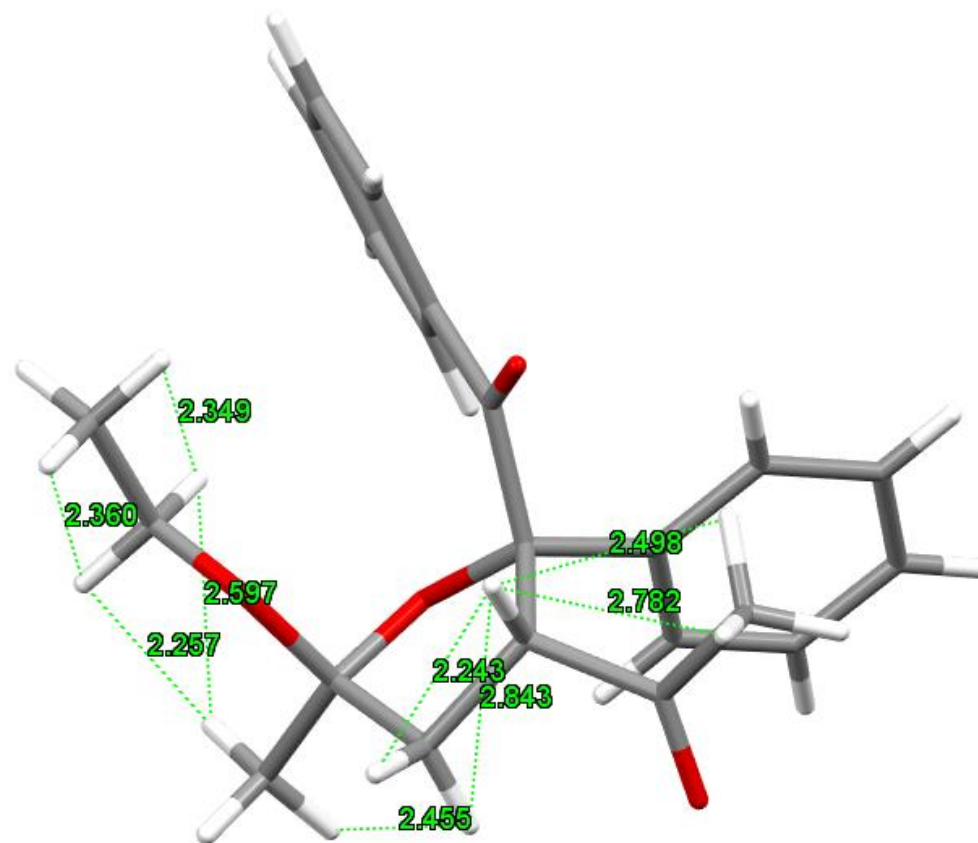Atom distances measured from X-ray data of **2aa**

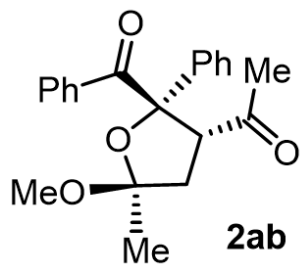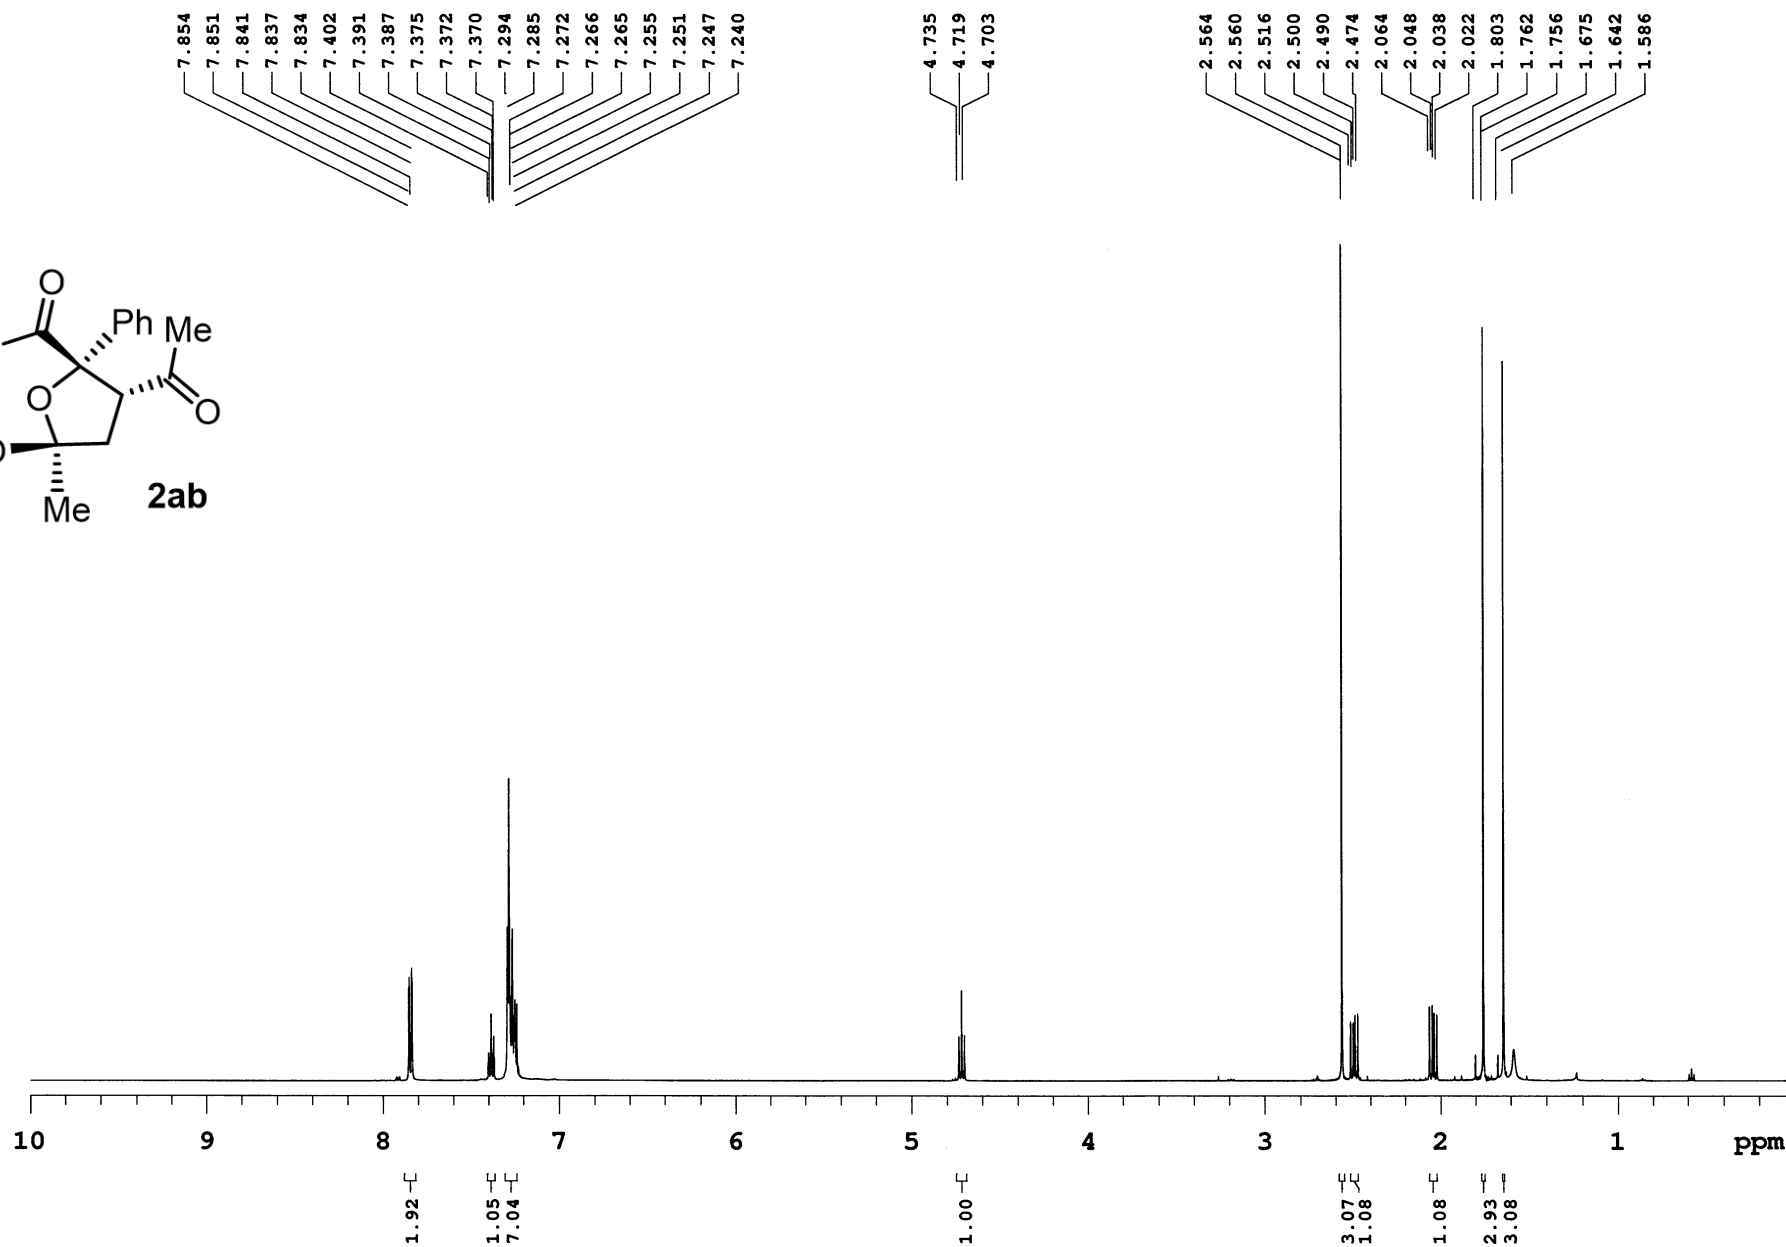

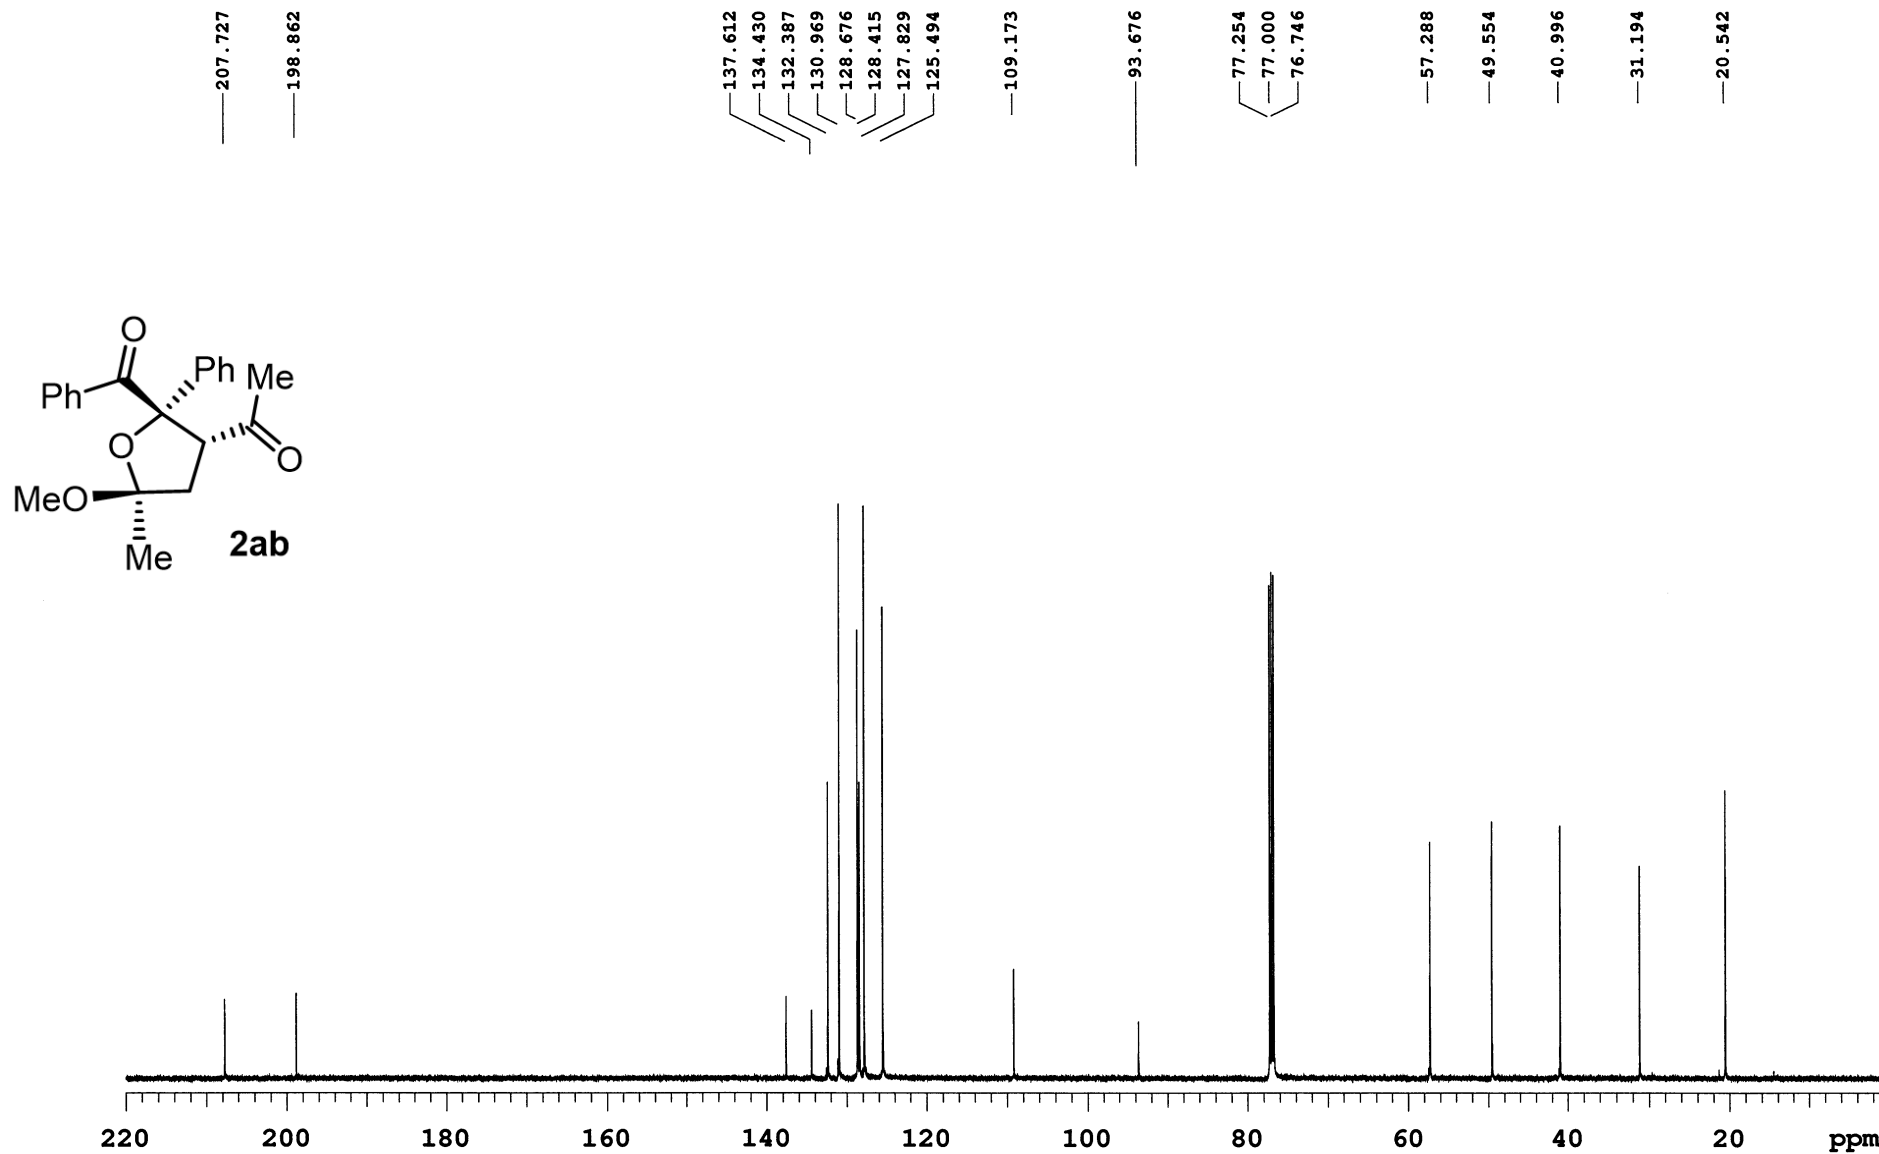

<sup>13</sup>C NMR (125 MHz, CDCl<sub>3</sub>) of compound 2ab

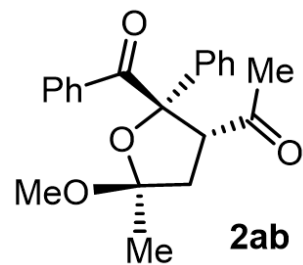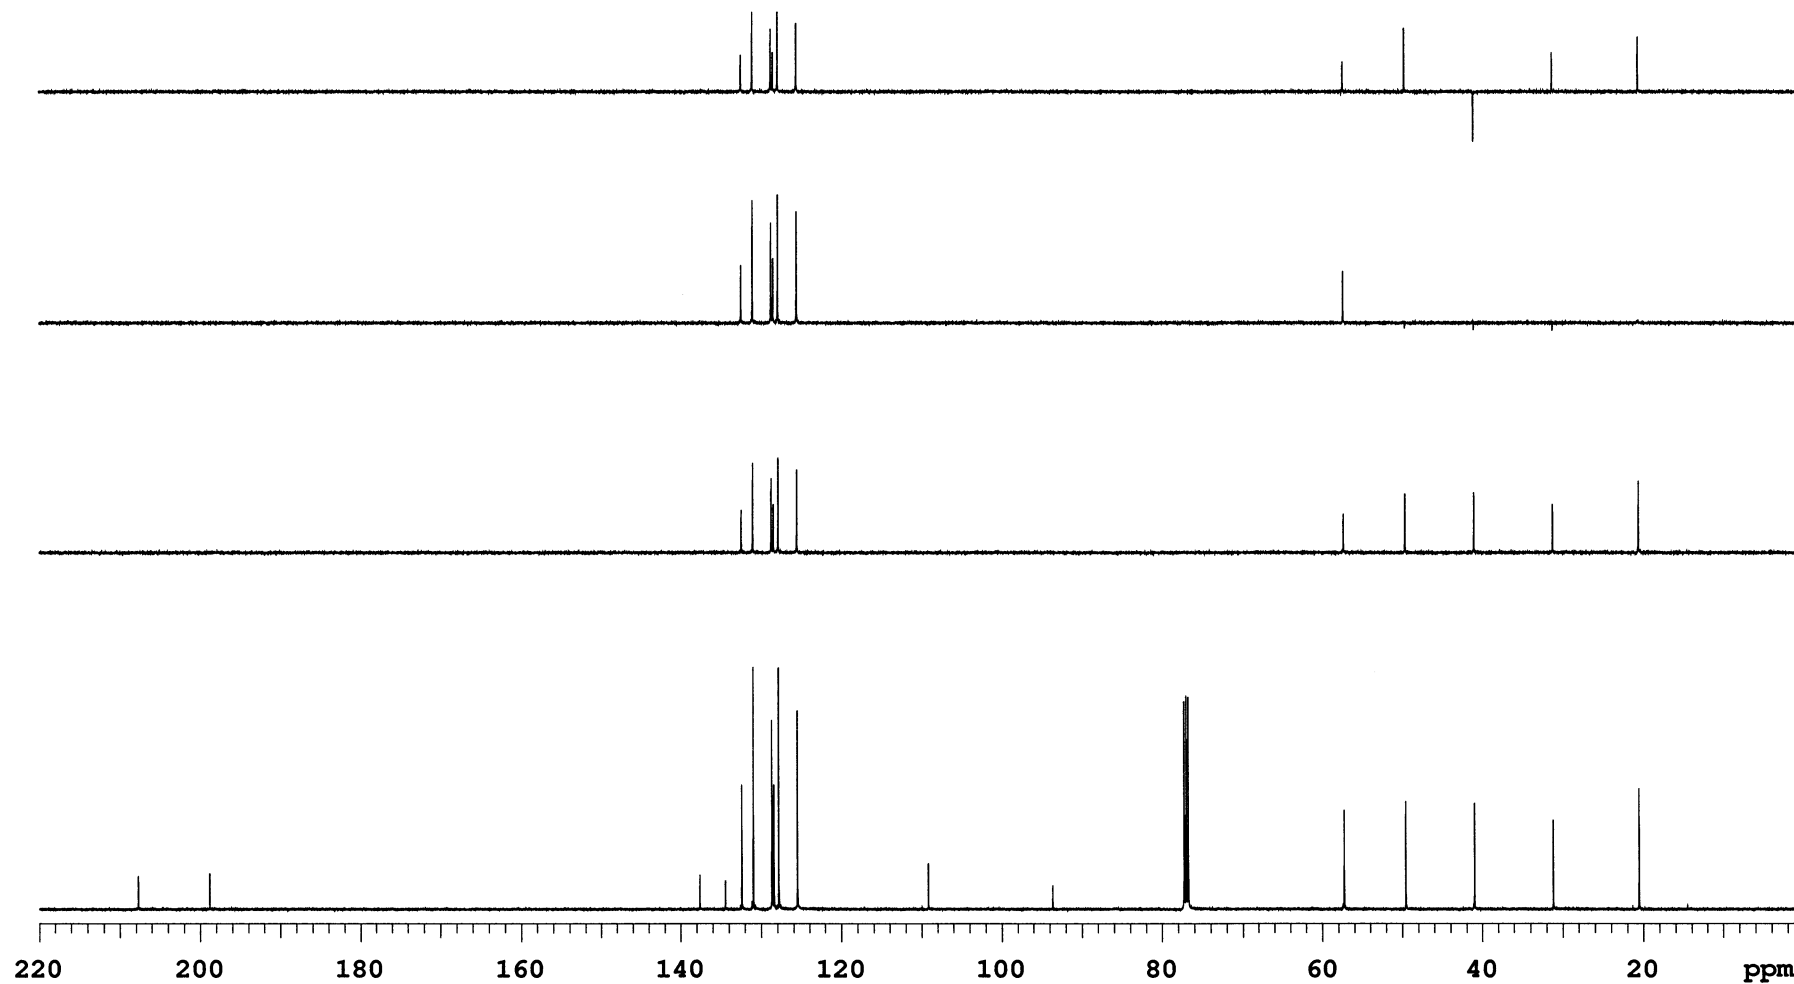

IRR-02-217

Sample Name **IRR-02-217**  
Date collected **2024-02-21**

Pulse sequence **gHSQC**  
Solvent **cdcl3**

Temperature **25**  
Spectrometer **Agilent-NMR-inova500**

Study owner **vnmr2**  
Operator **vnmr2**

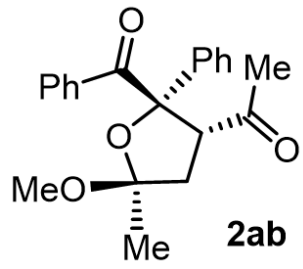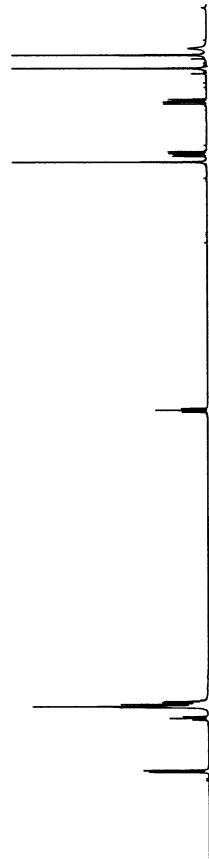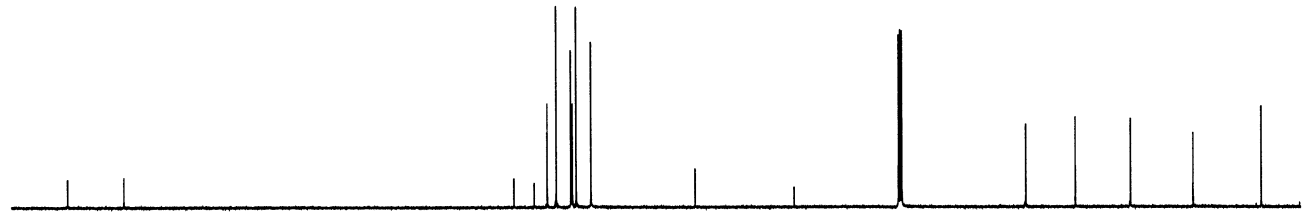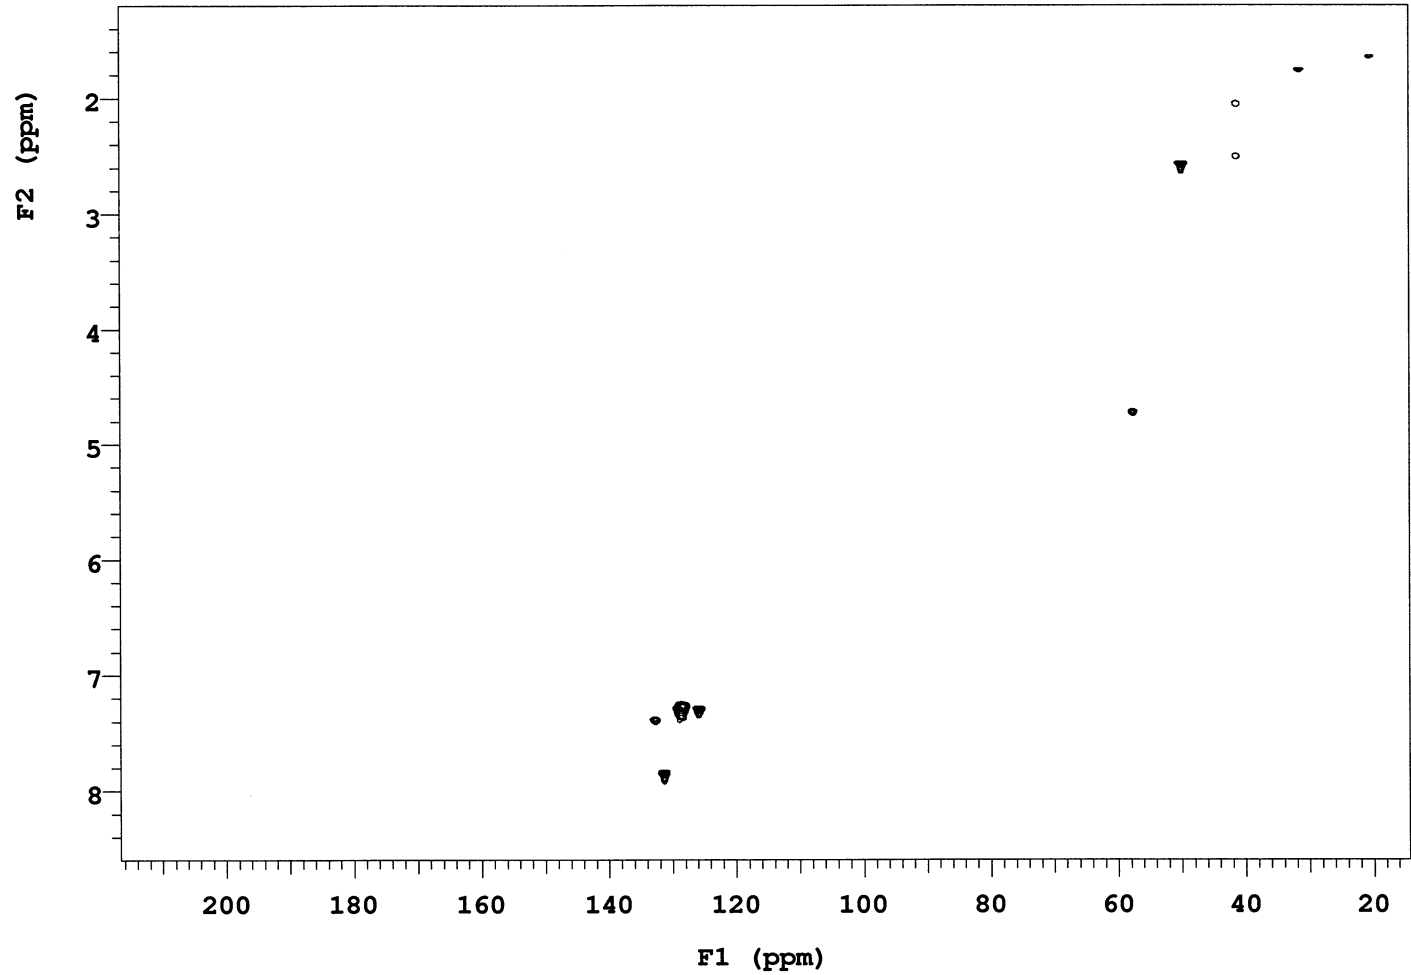

HSQC of compound 2ab

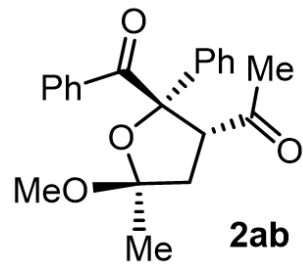

2ab

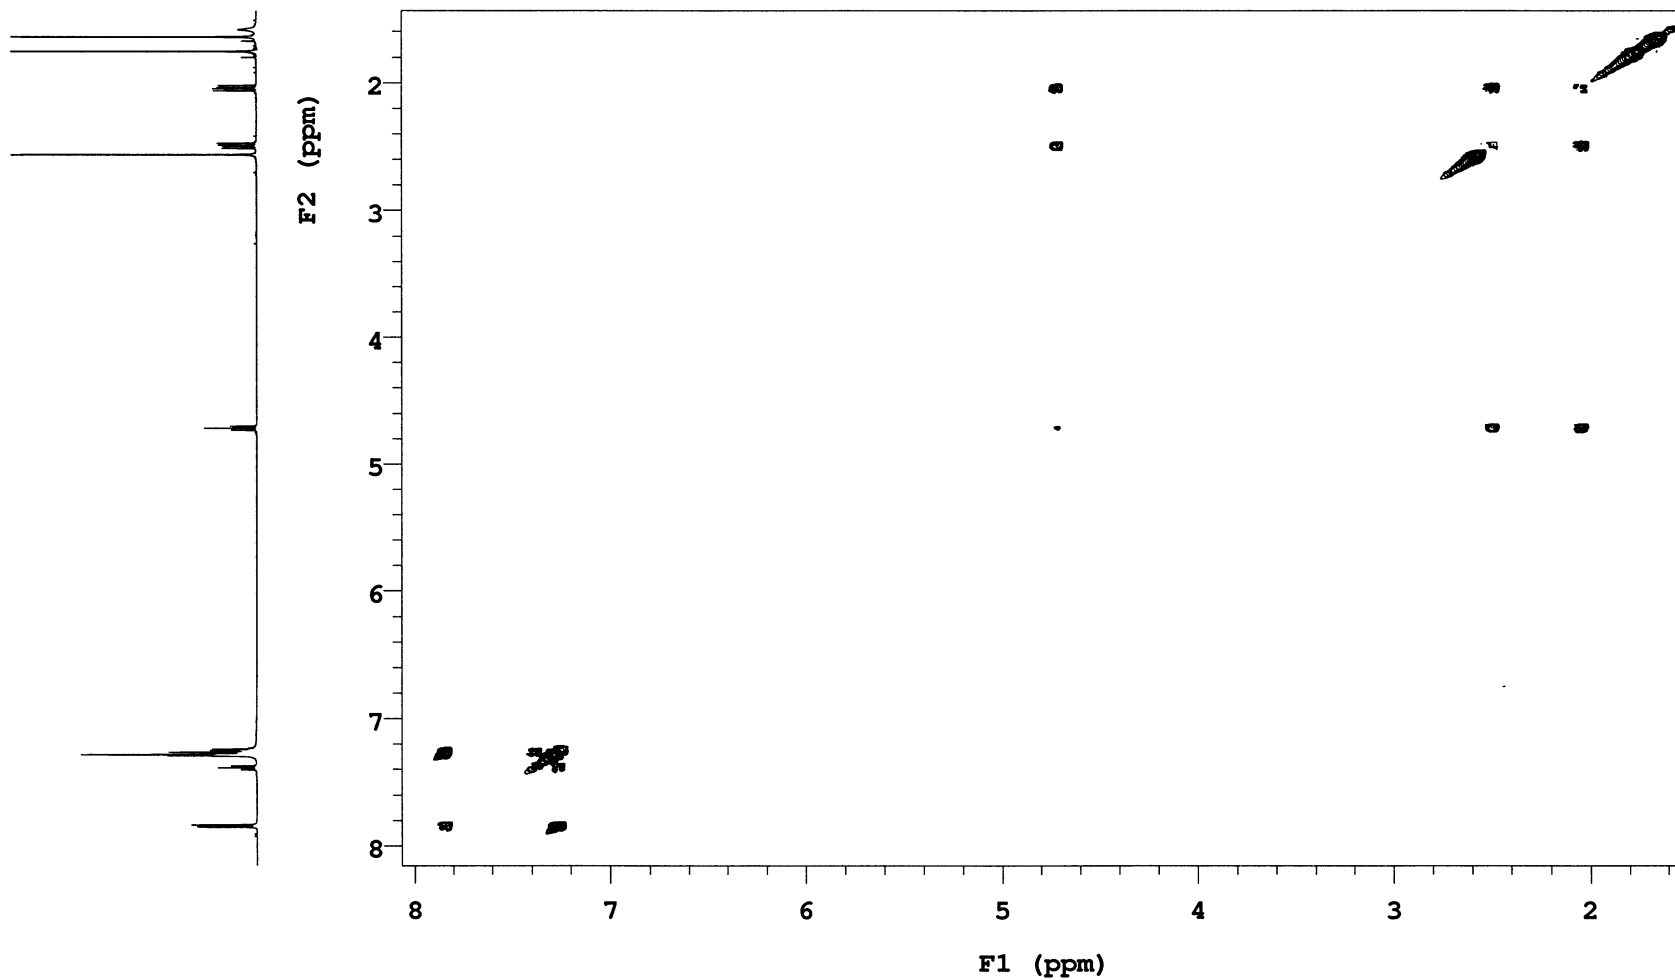

COSY of compound 2ab

IRR-02-217

Sample Name IRR-02-217  
Date collected 2024-02-21Pulse sequence NOESY  
Solvent cdcl3Temperature 25  
Spectrometer Agilent-NMR-inova500Study owner vnmr2  
Operator vnmr2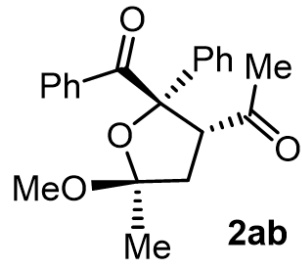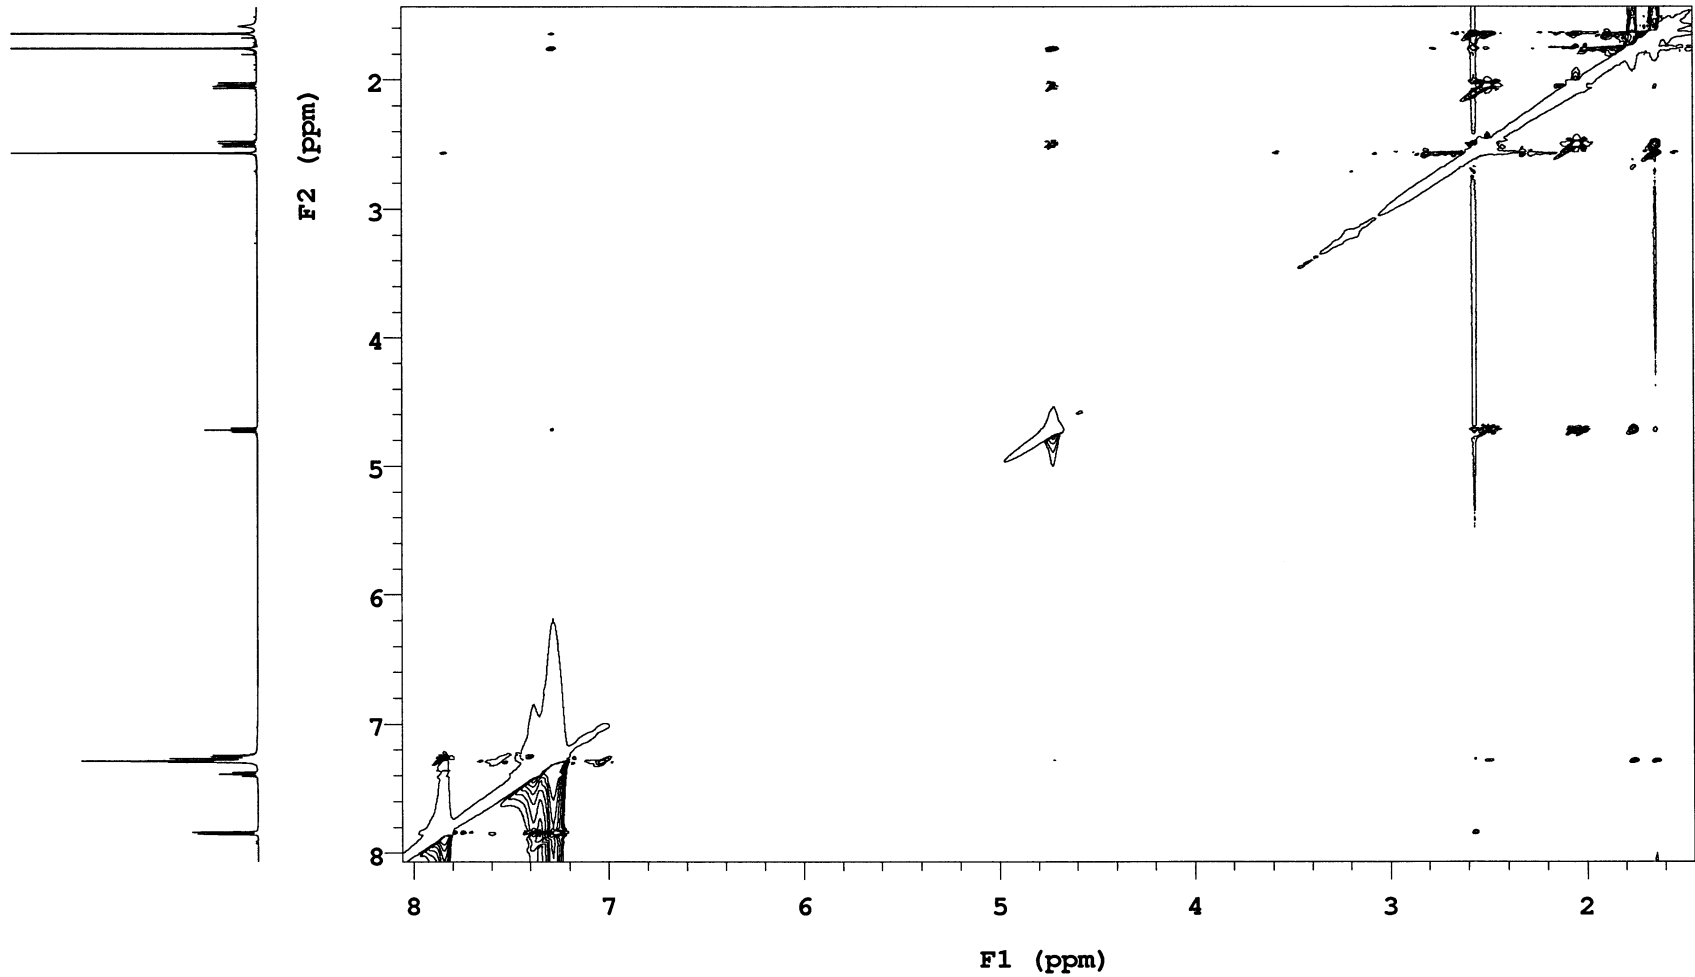

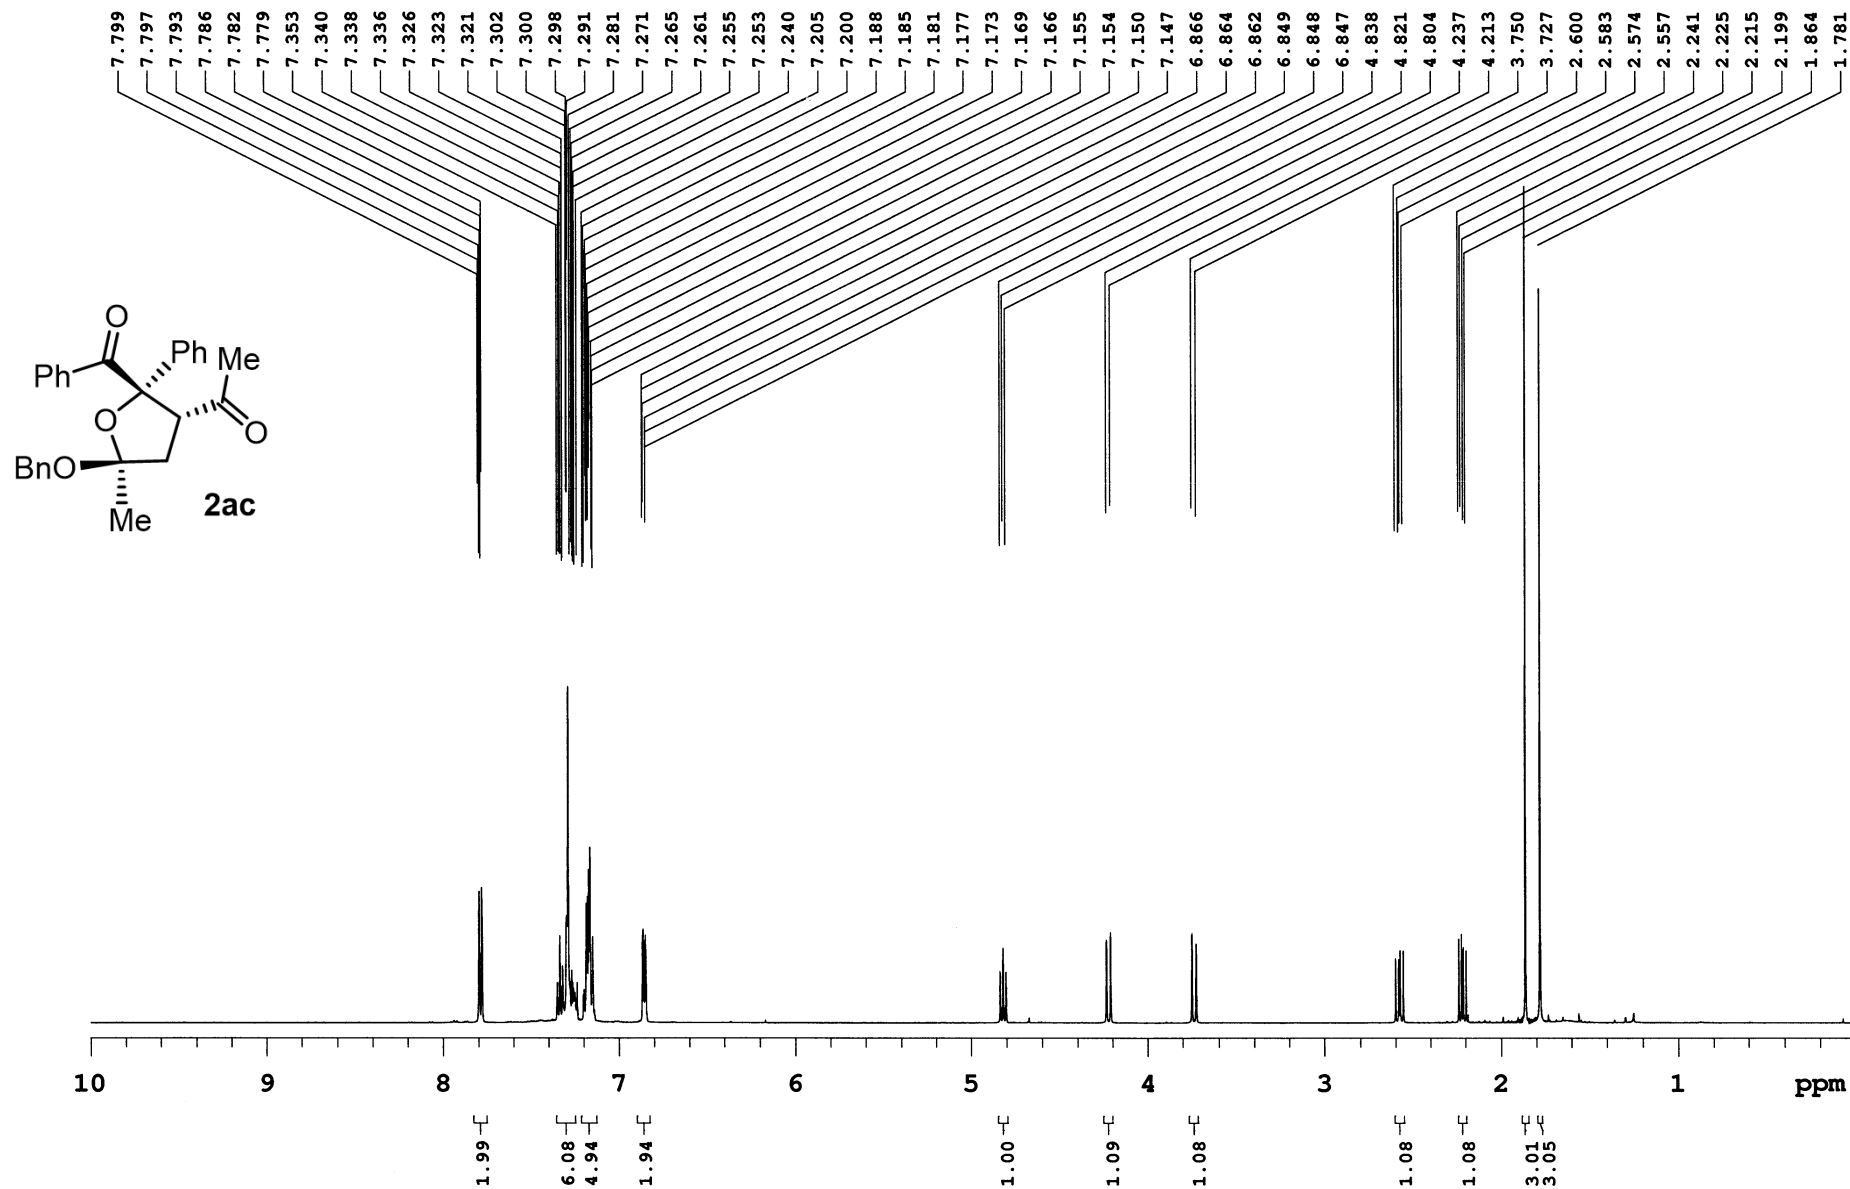



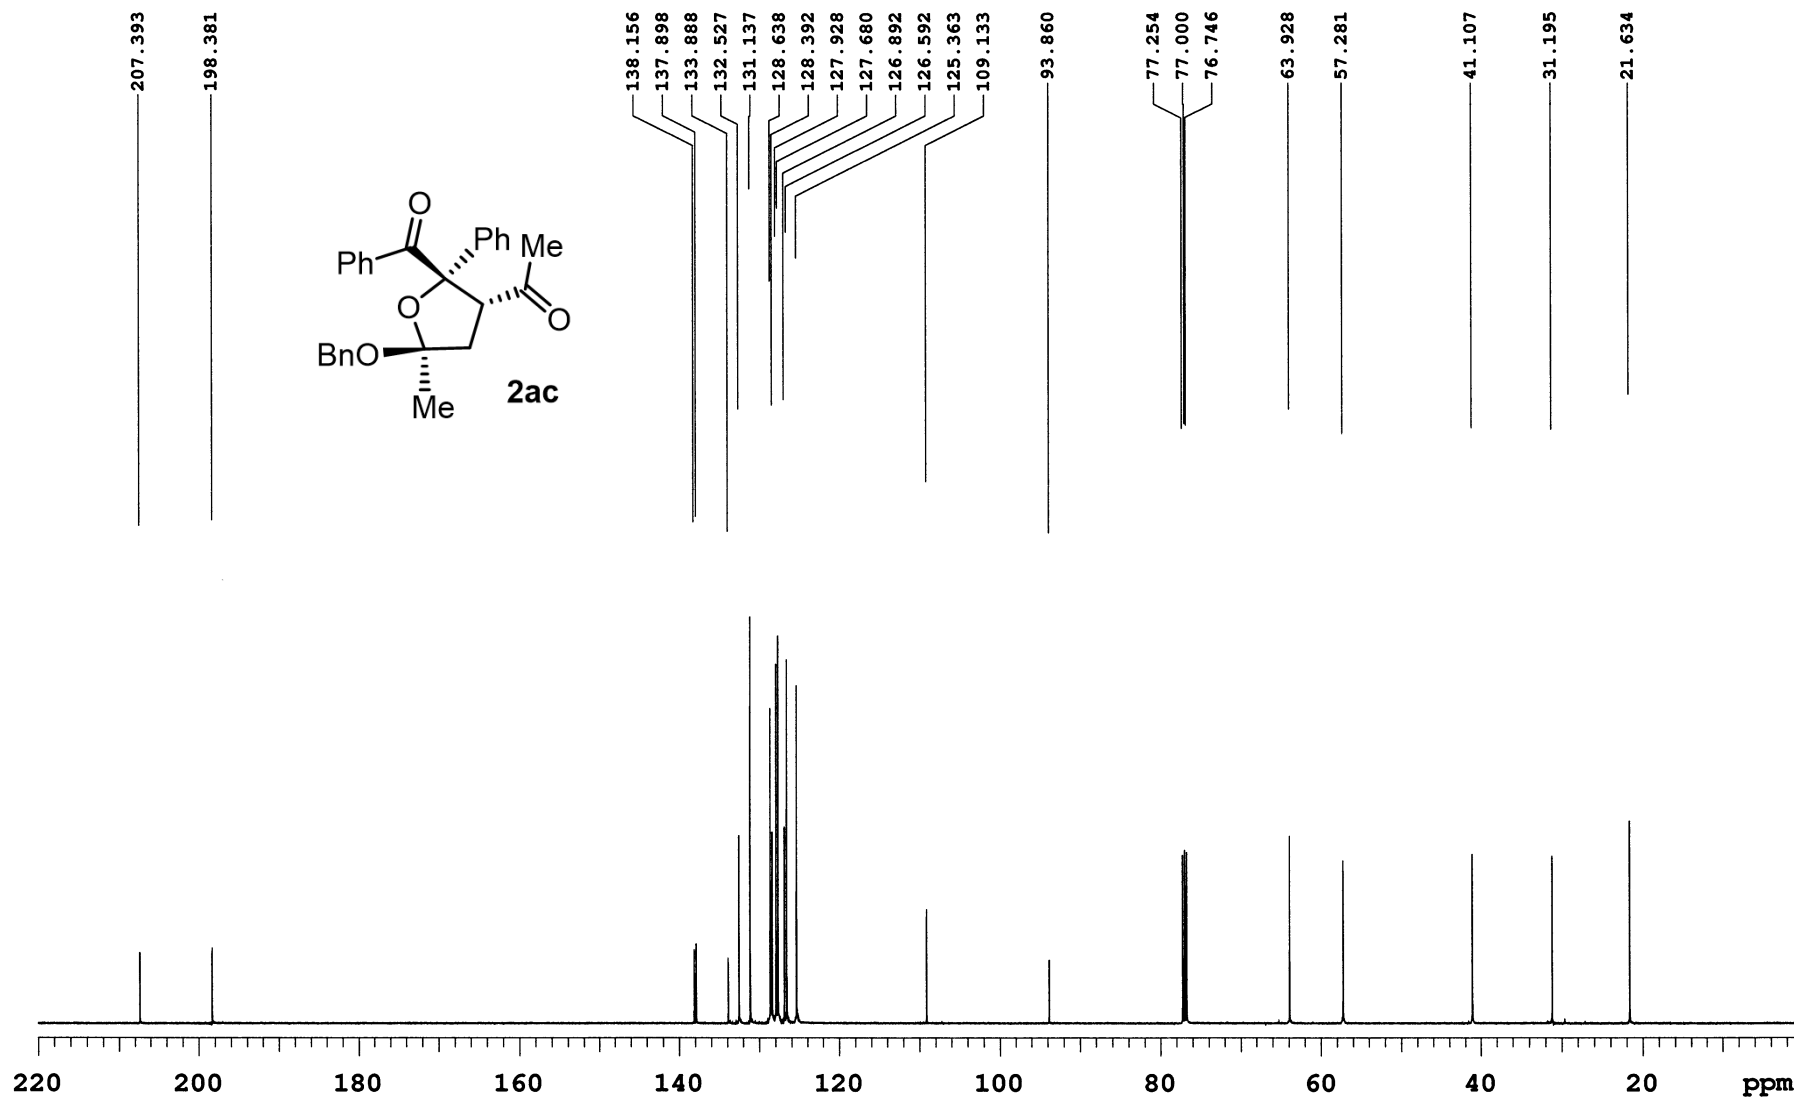

13C NMR (125 MHz, CDCl3) of compound 2ac

IRR-02-220

Sample Name IRR-02-220  
Date collected 2024-02-05Pulse sequence DEPT  
Solvent cdcl3Temperature 25  
Spectrometer Agilent-NMR-inova500Study owner vnmr2  
Operator vnmr2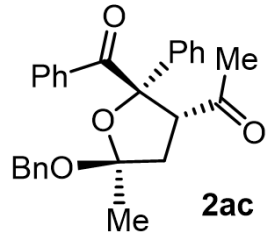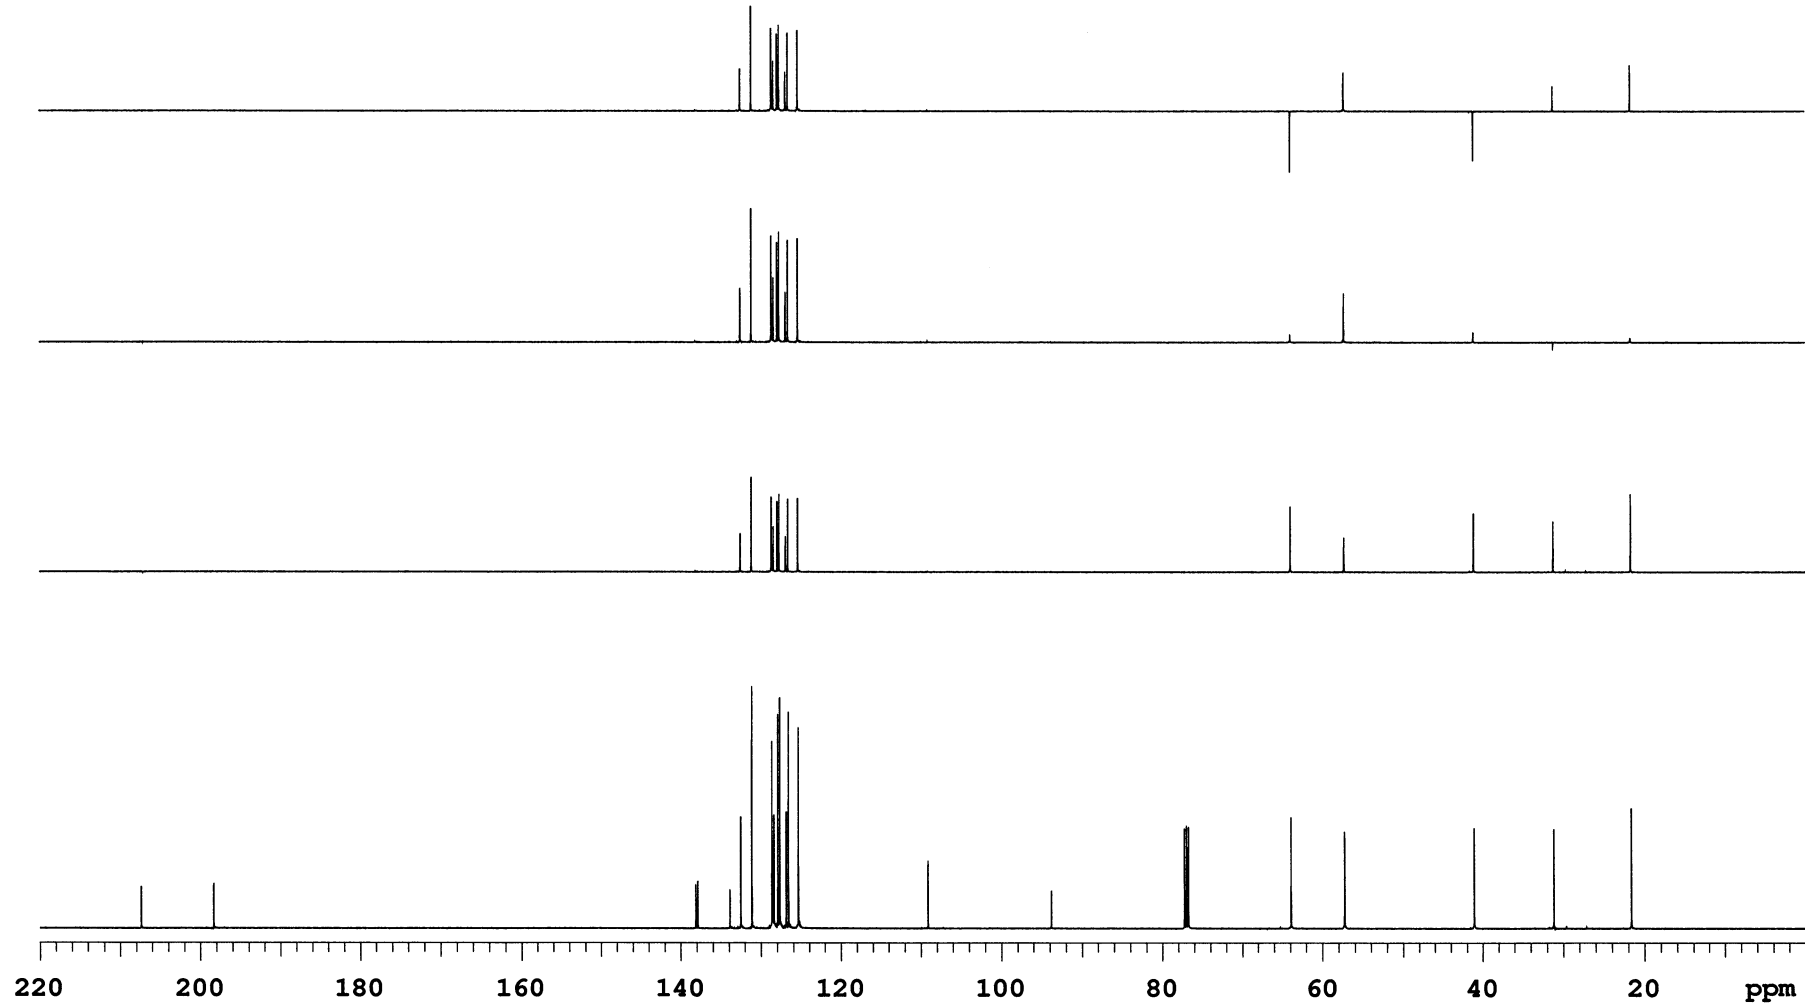

DEPT of compound 2ac

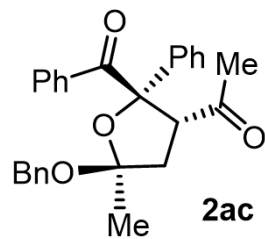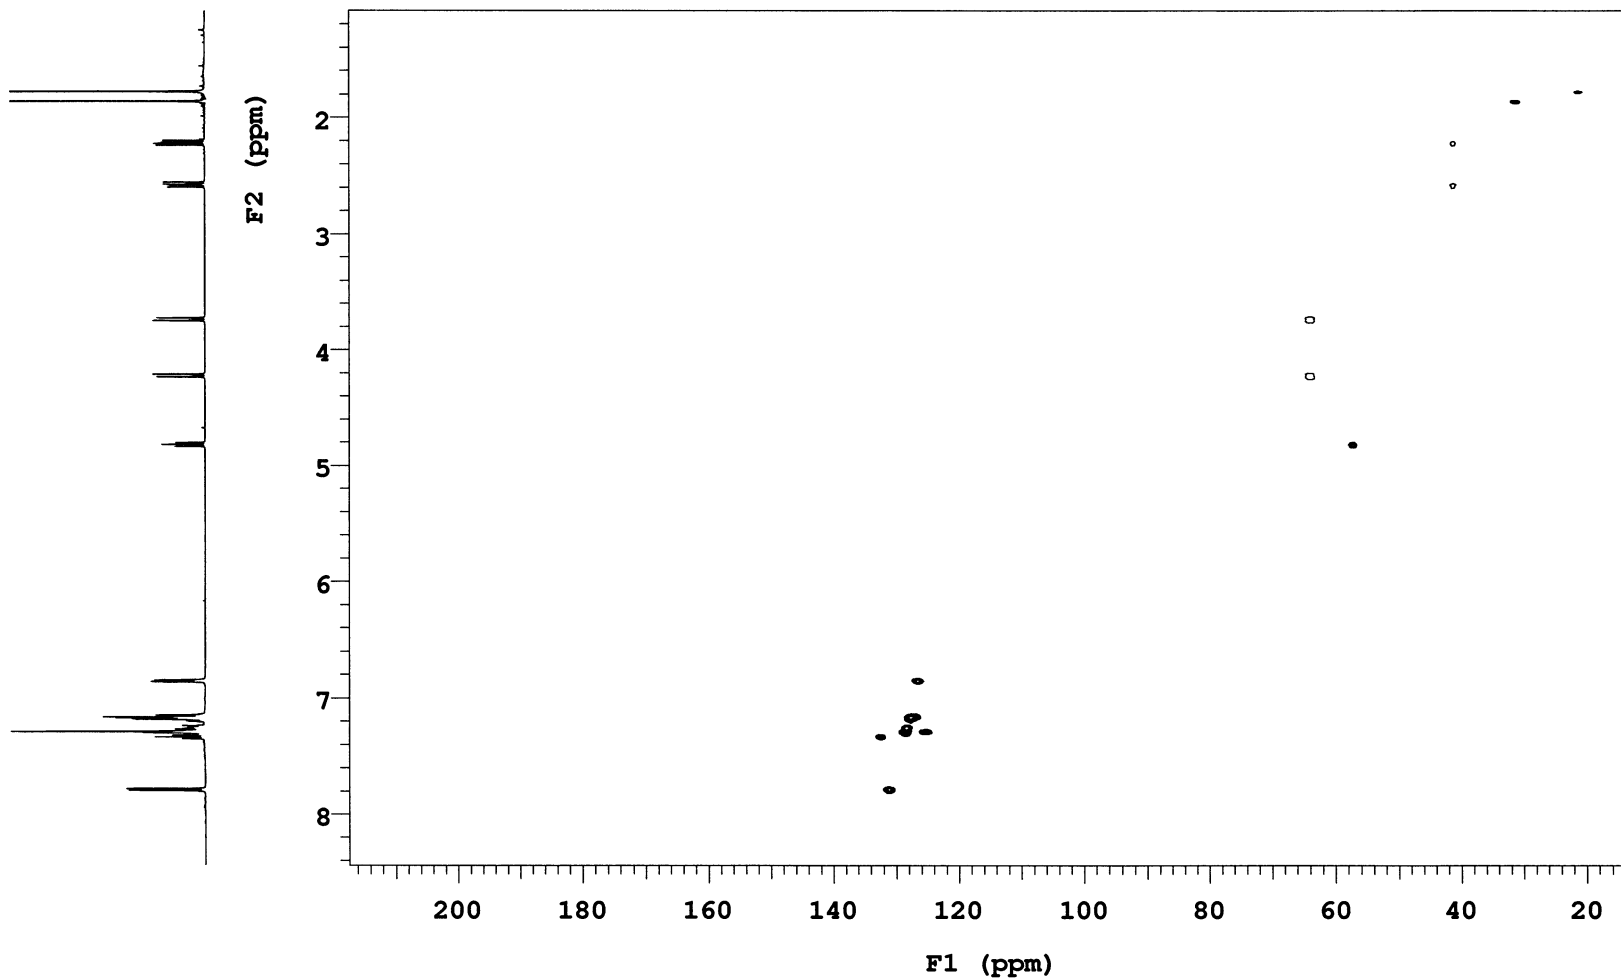

HSQC of compound 2ac

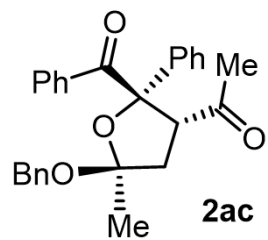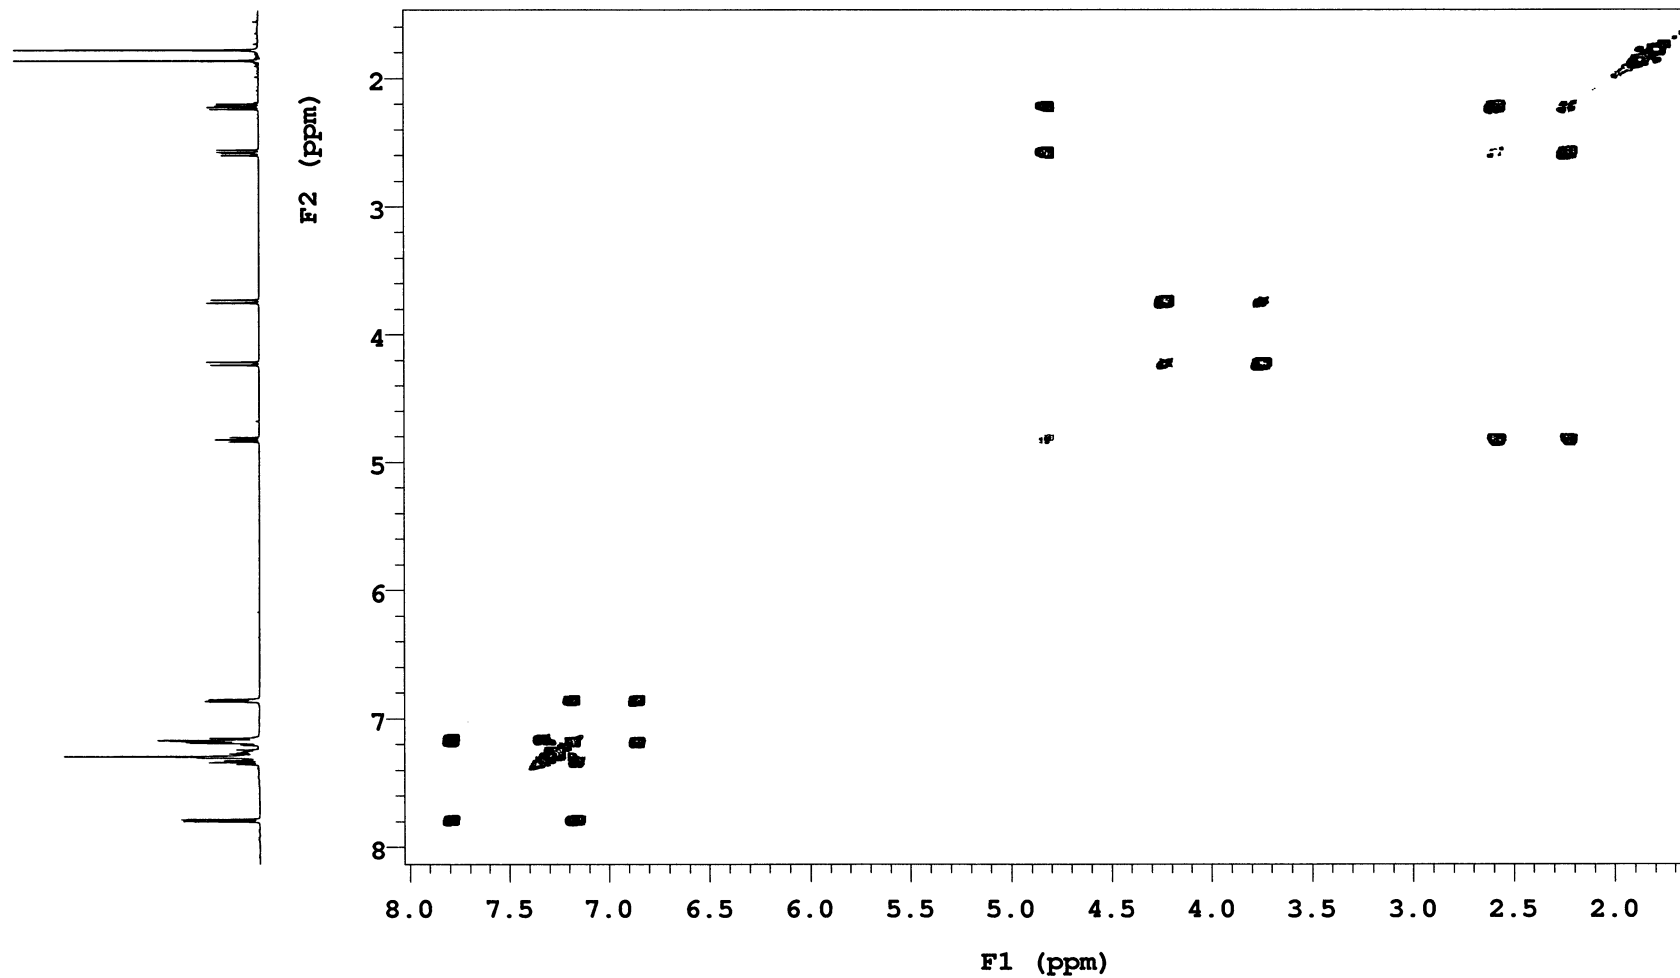

COSY of compound 2ac

Sample Name **IRR-02-220**  
Date collected **2024-02-06**Pulse sequence **NOESY**  
Solvent **cdcl3**Temperature **25**  
Spectrometer **Agilent-NMR-inova500**Study owner **vnmr2**  
Operator **vnmr2**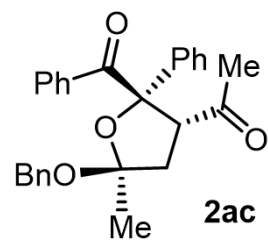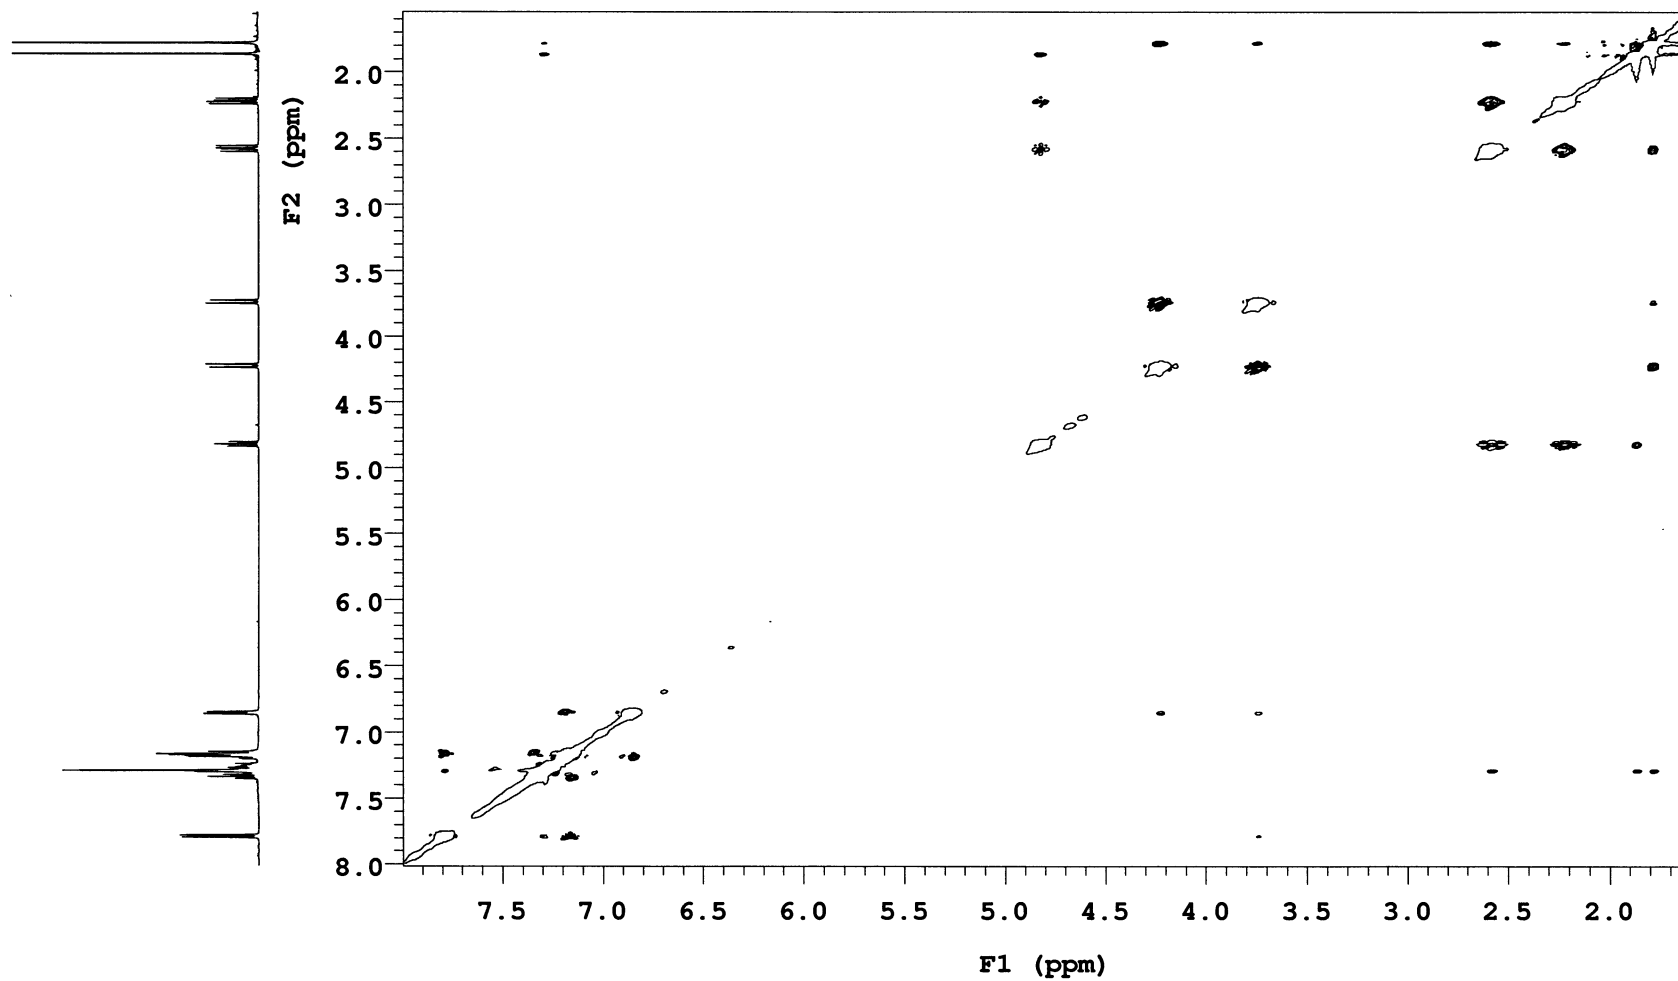

NOESY of compound 2ac

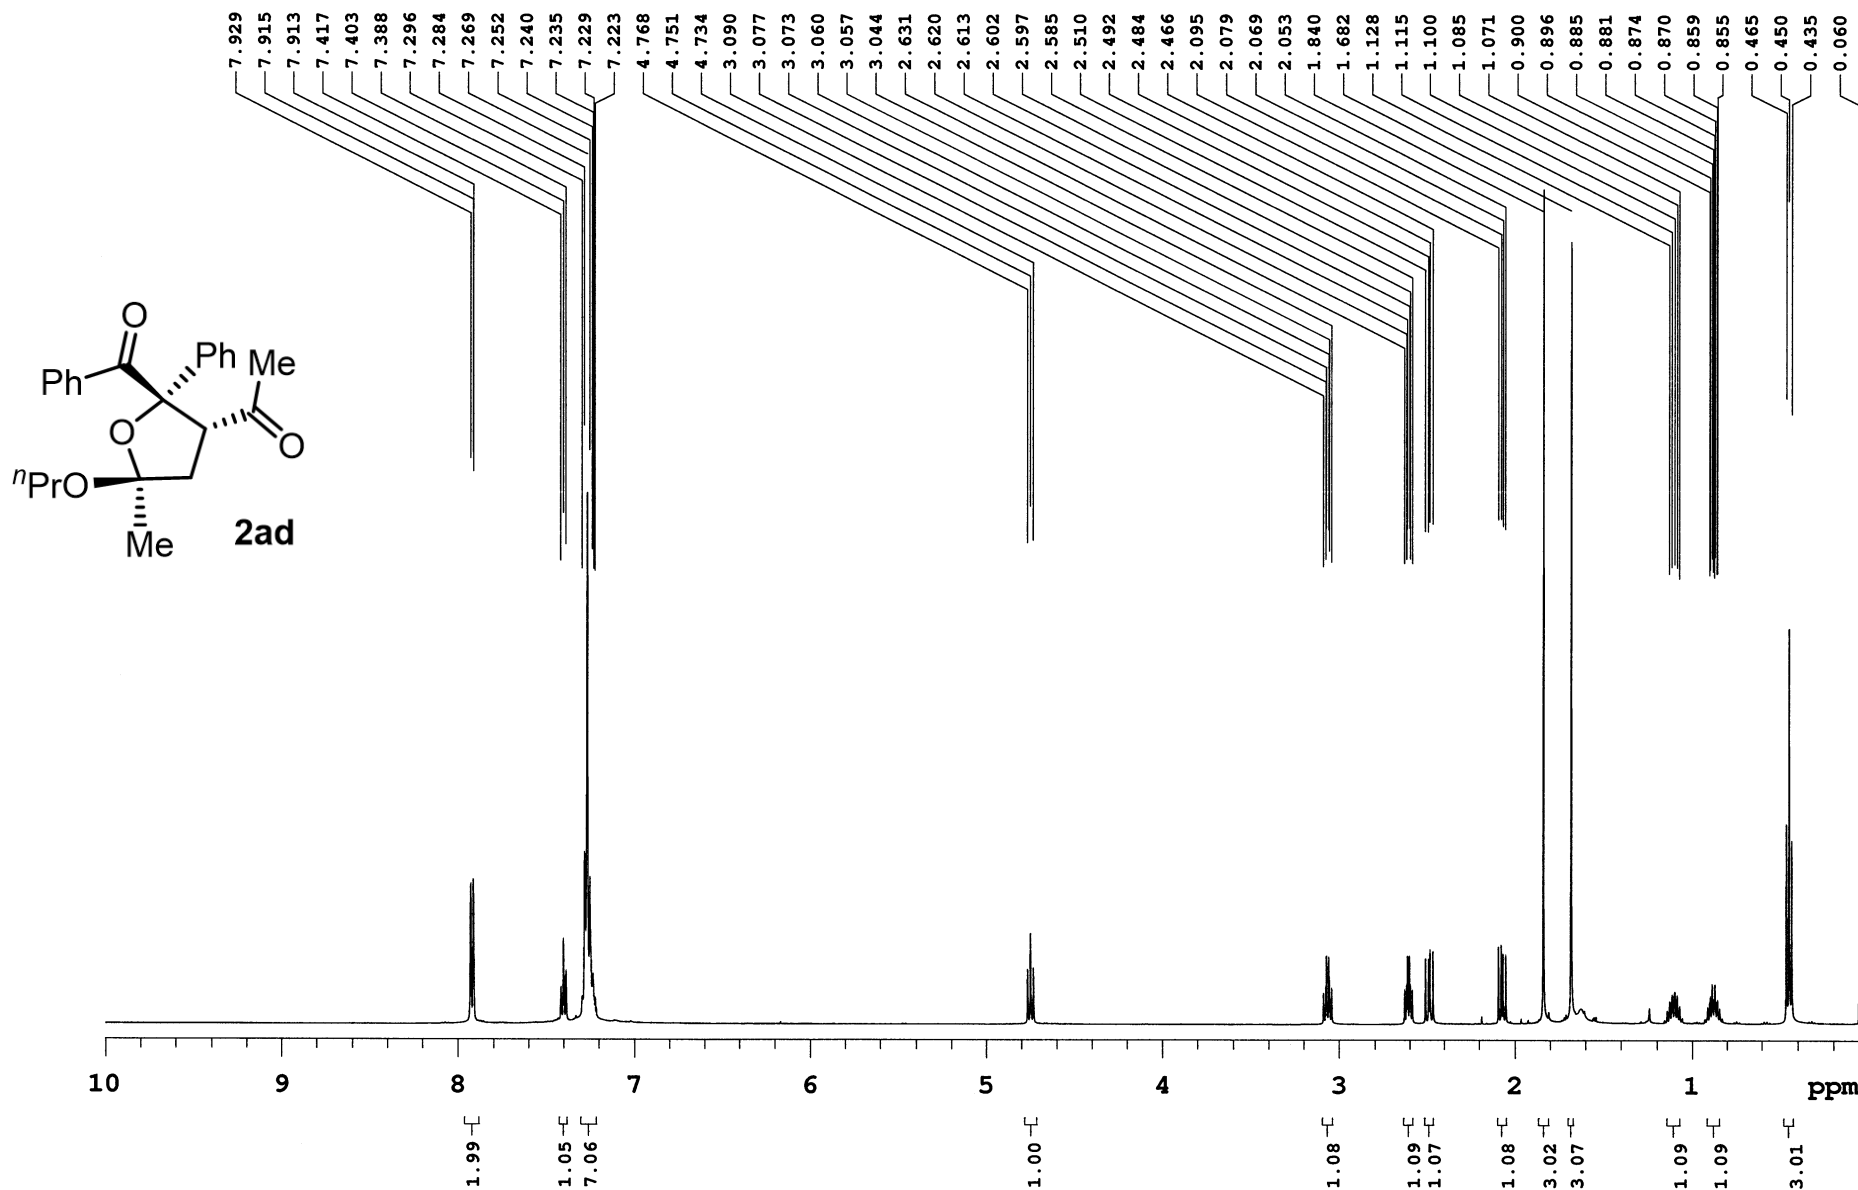

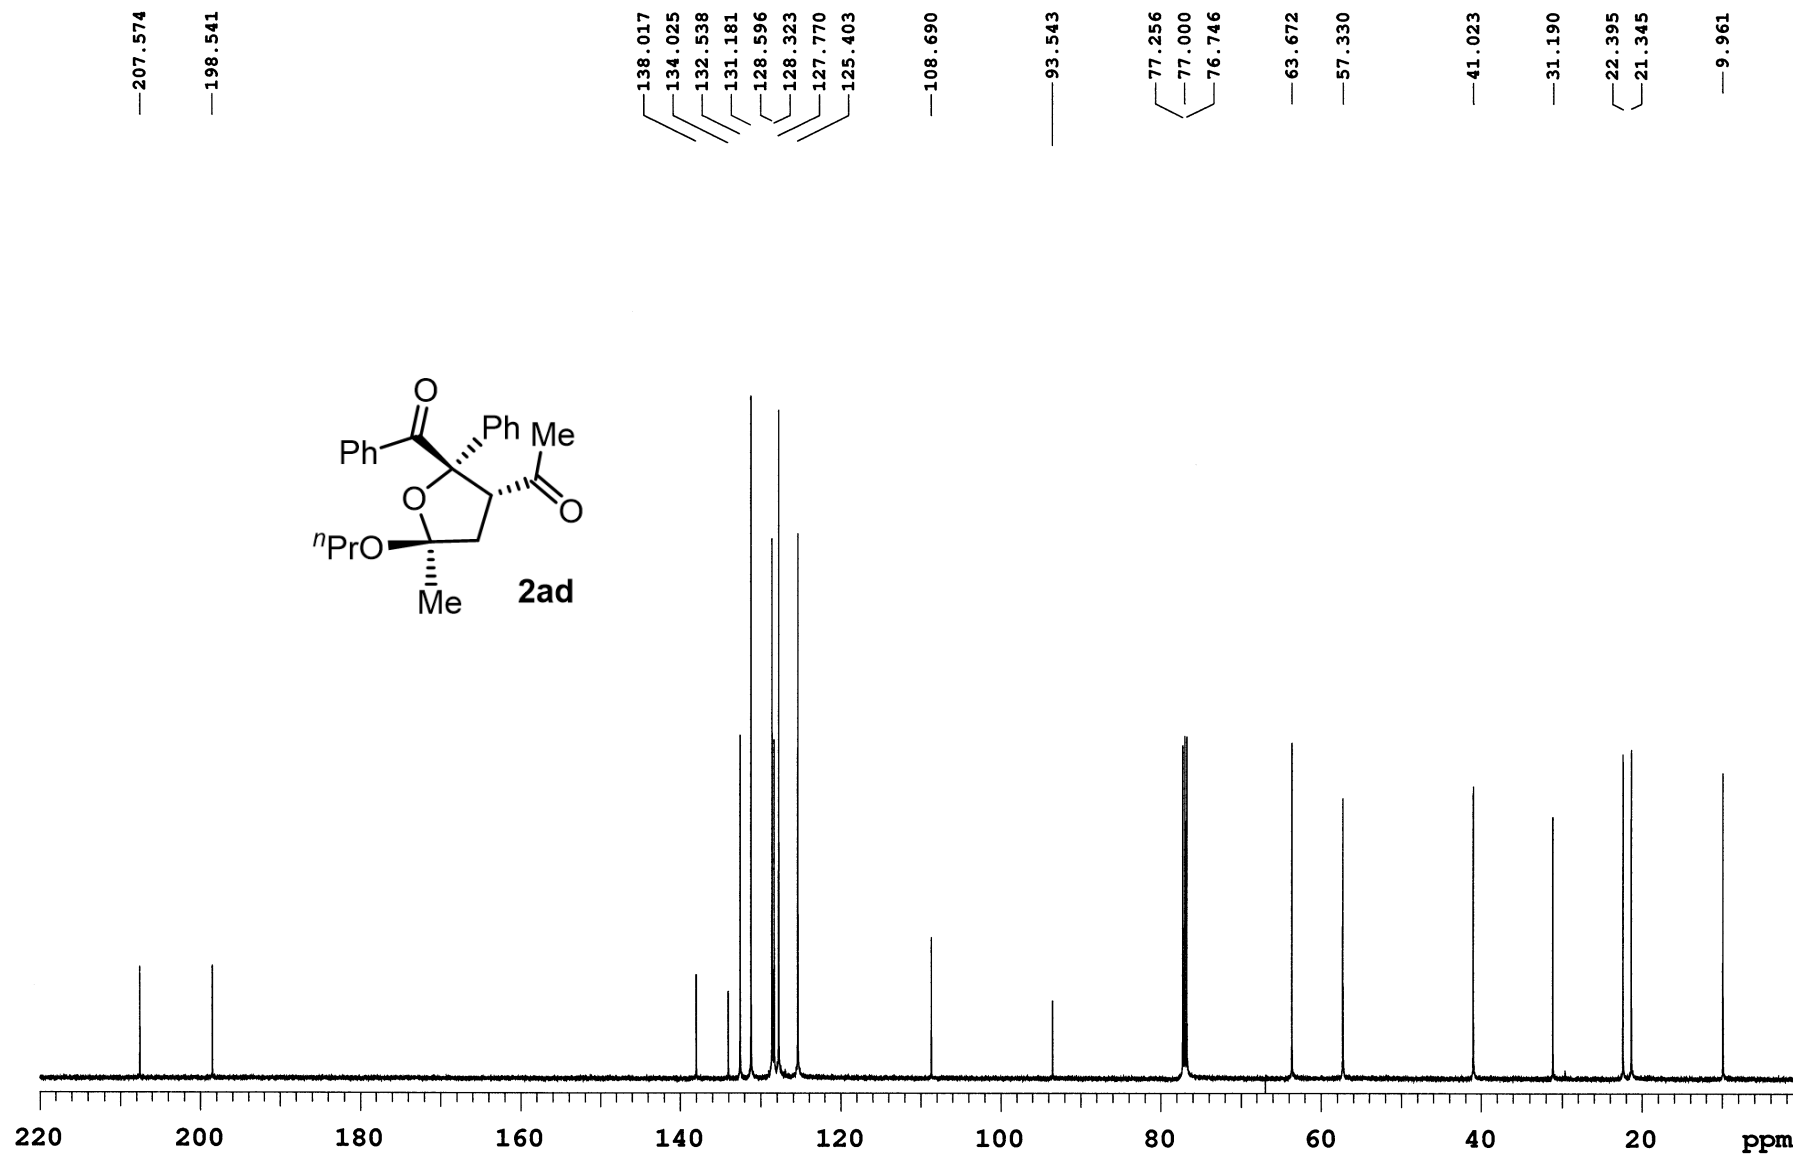13C NMR (125 MHz, CDCl<sub>3</sub>) of compound 2ad

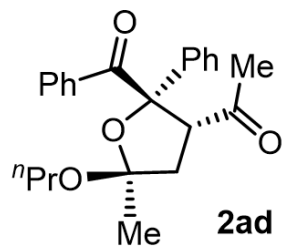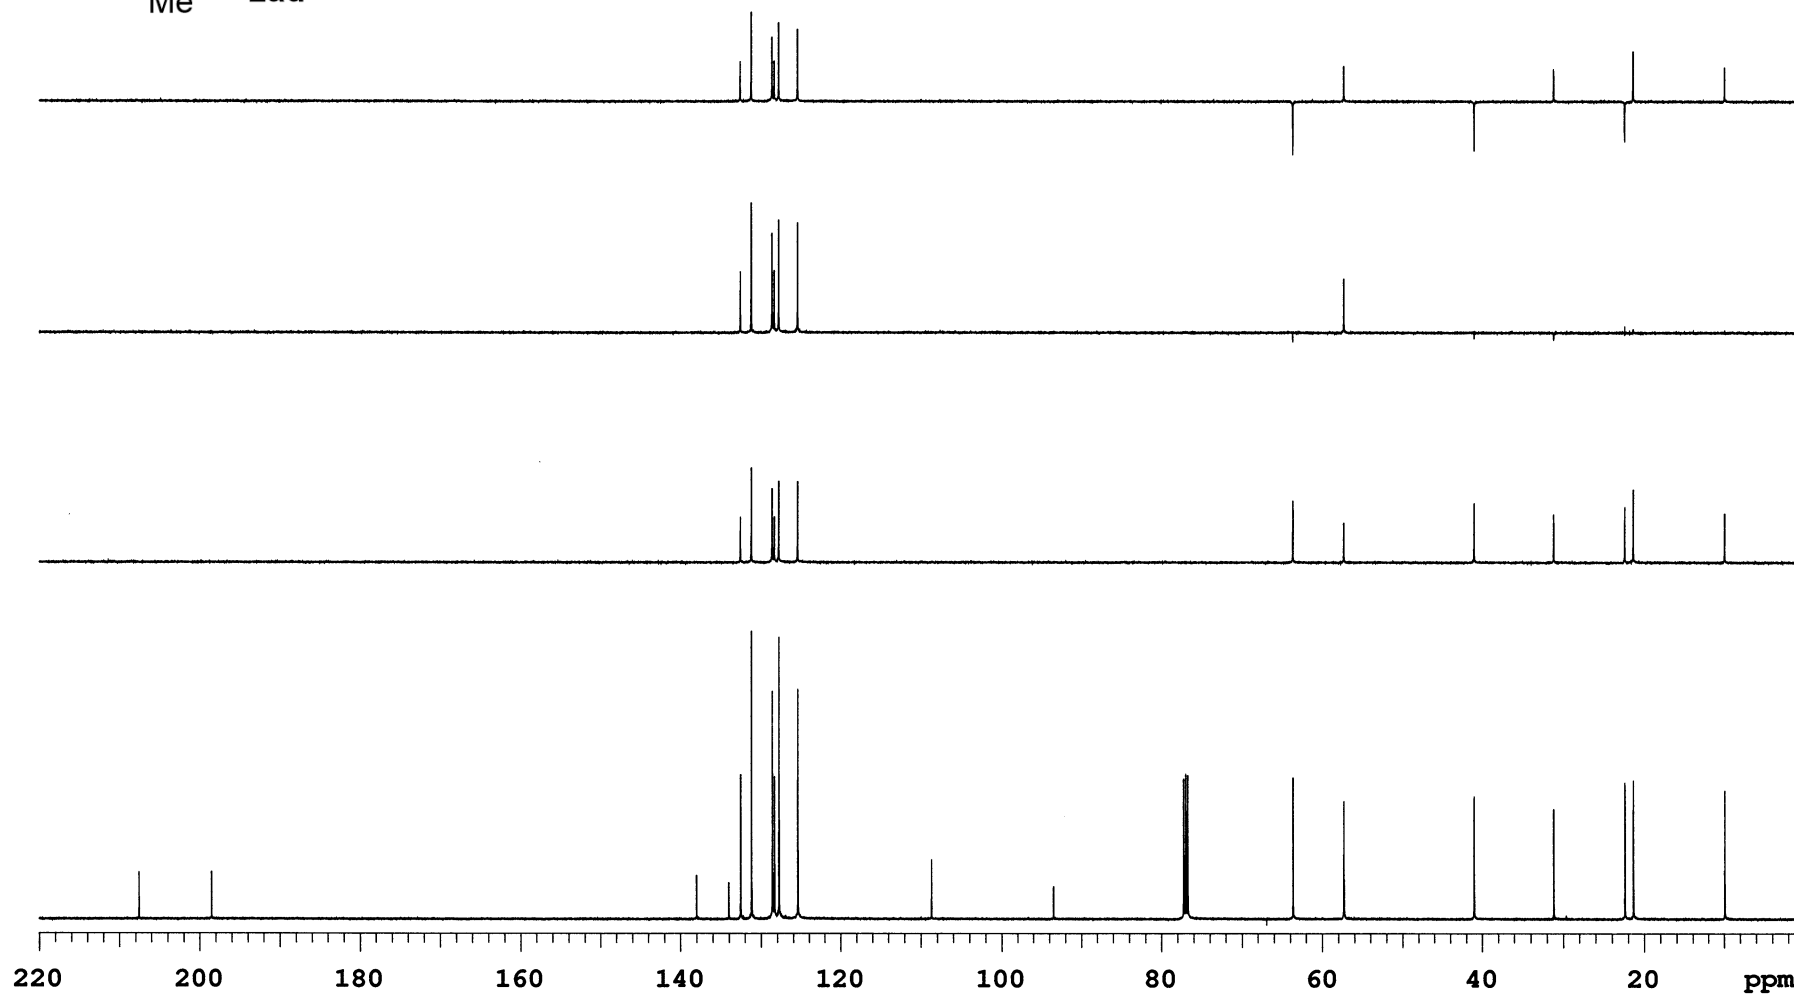

DEPT of compound 2ad



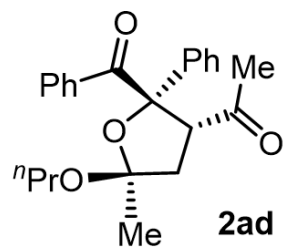

2ad

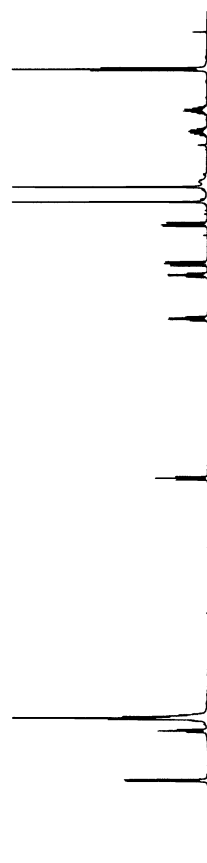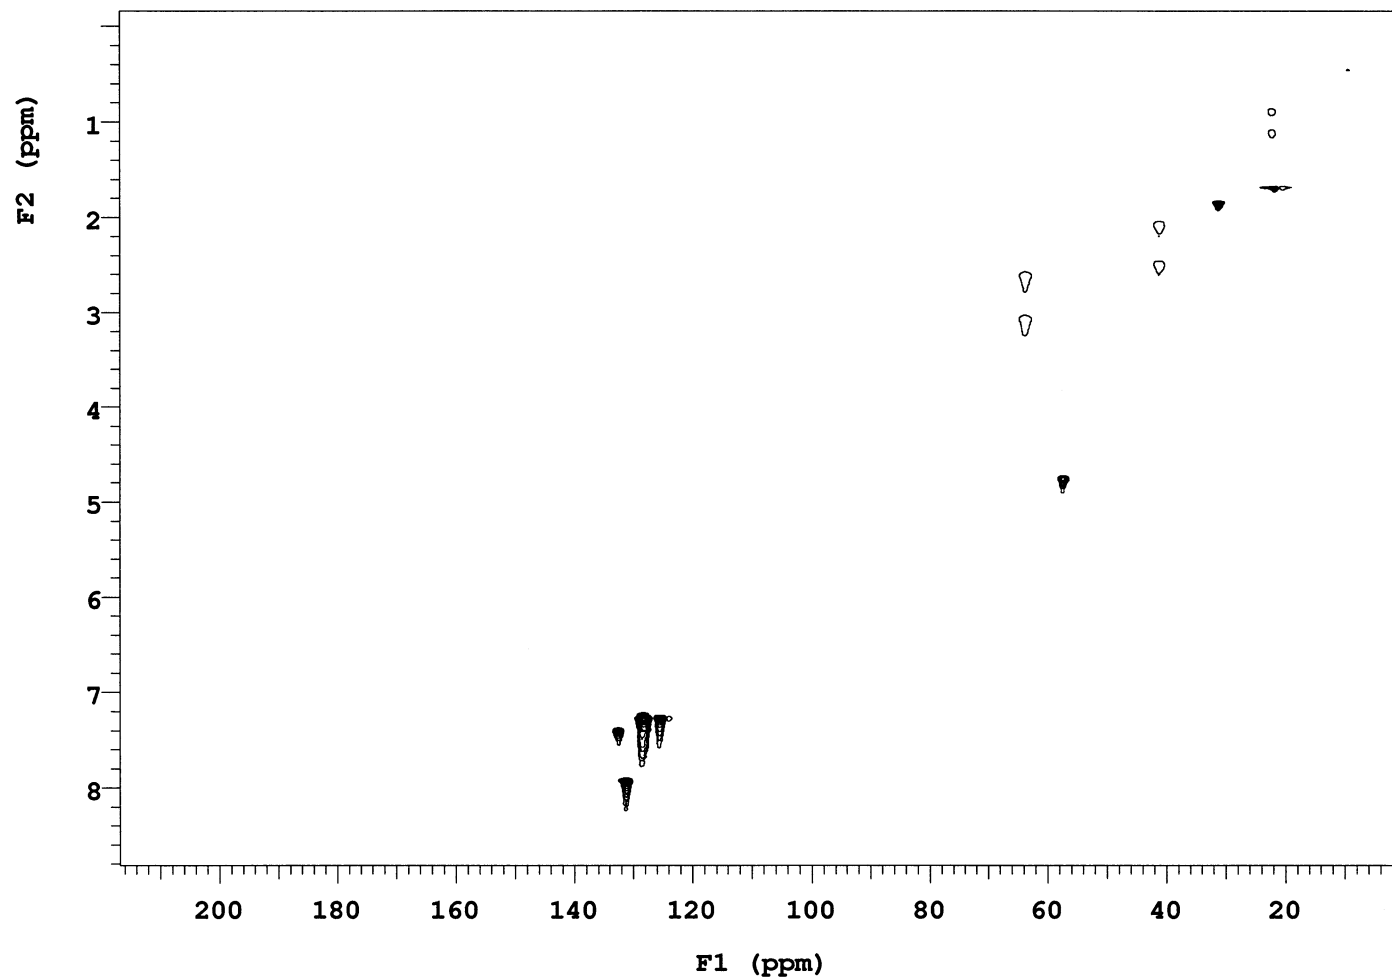

HSQC of compound 2ad

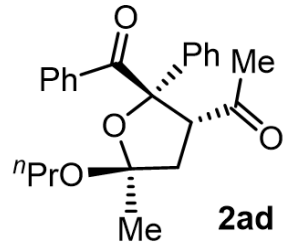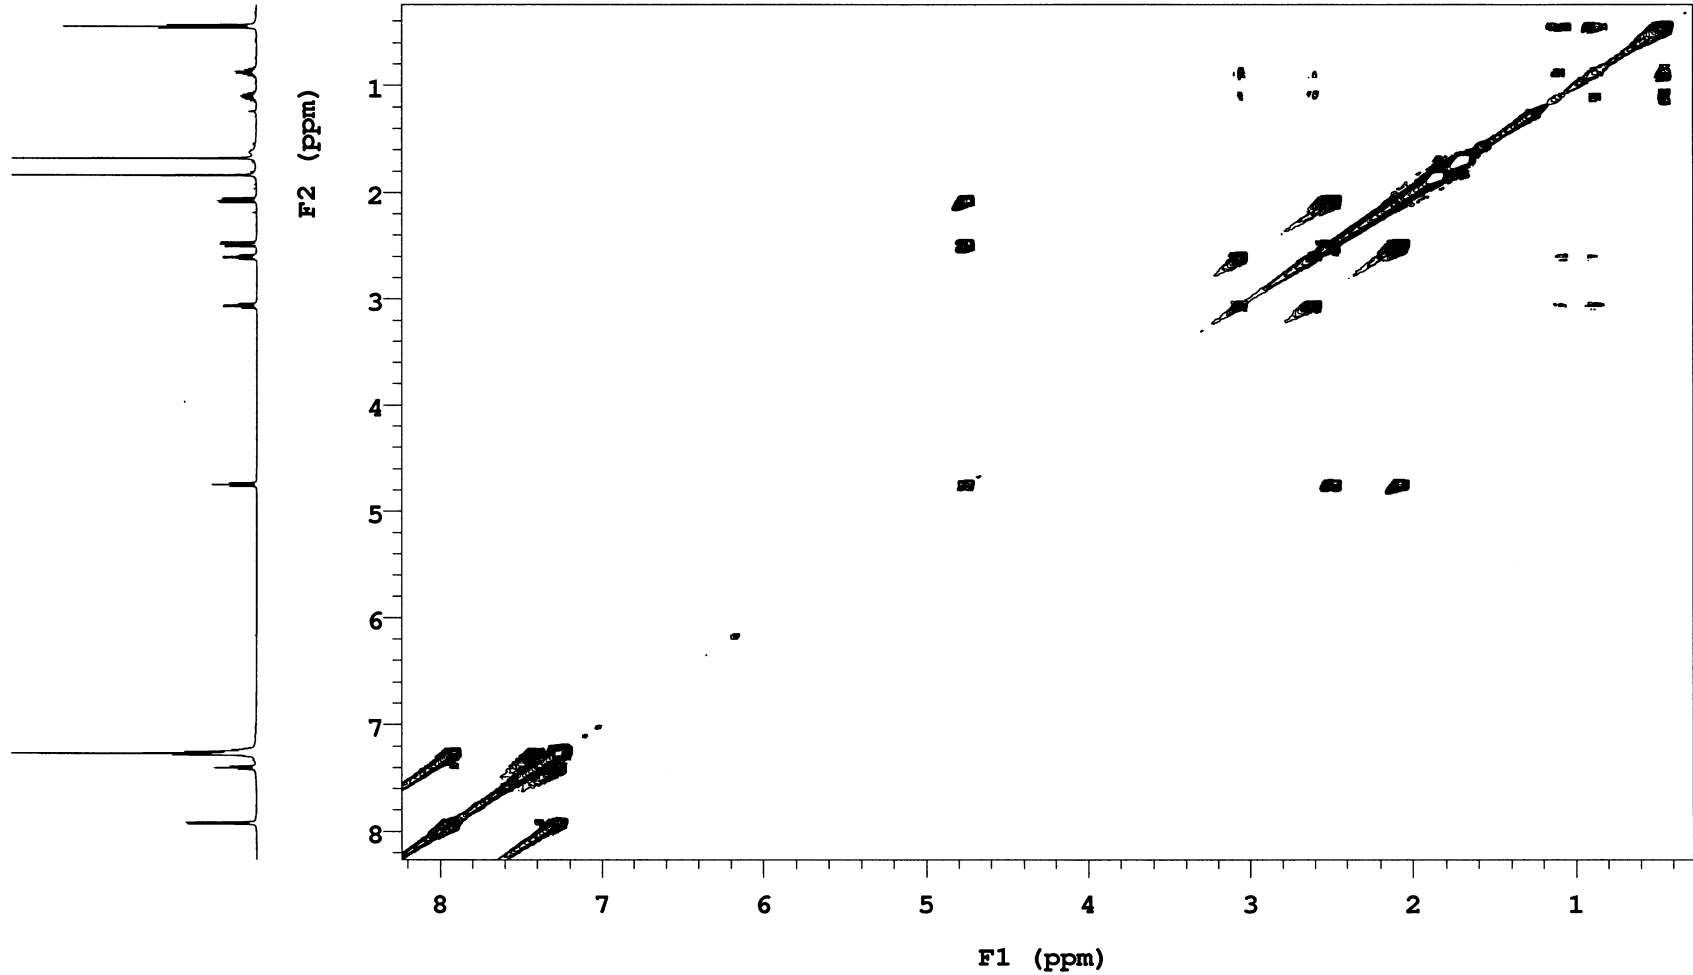

COSY of compound 2ad

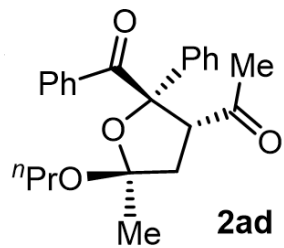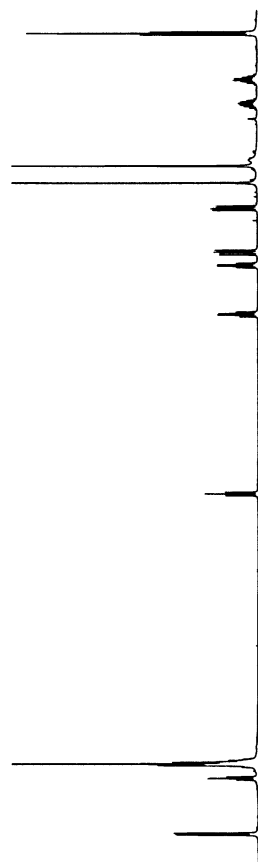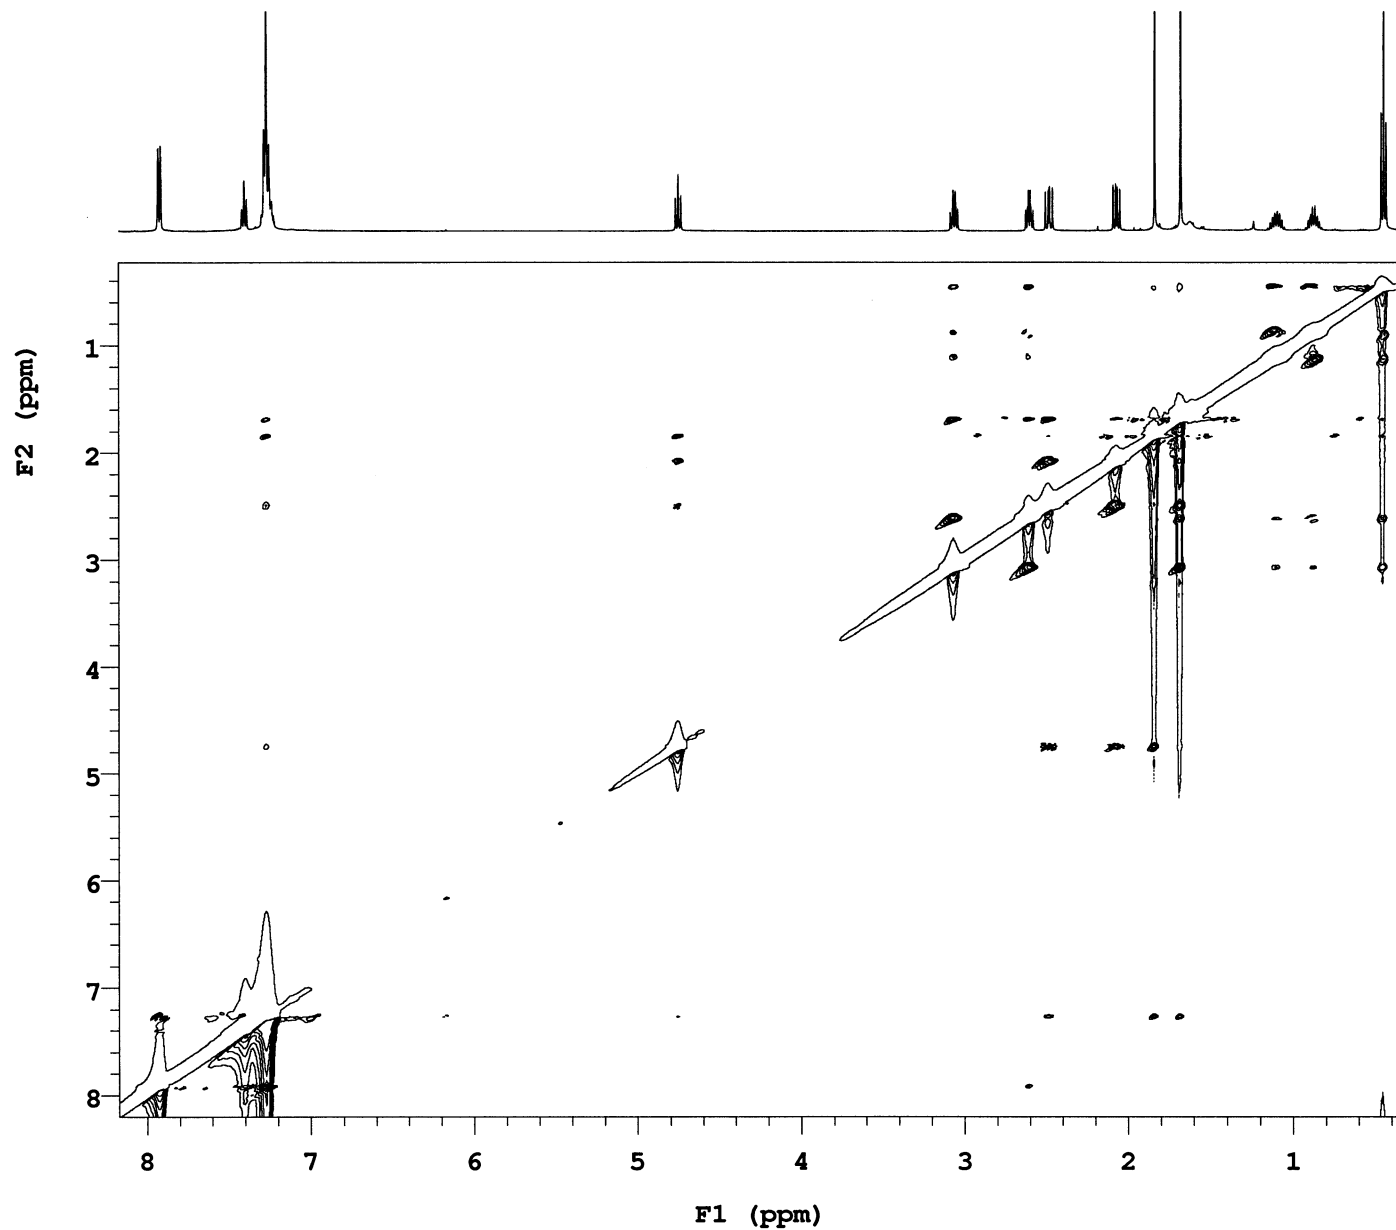

NOESY of compound 2ad

IRR-02-219

Sample Name IRR-02-219  
Date collected 2024-09-24

Pulse sequence PROTON  
Solvent cdcl3

Temperature 25  
Spectrometer Agilent-NMR-inova500

Study owner vnmr2  
Operator vnmr2

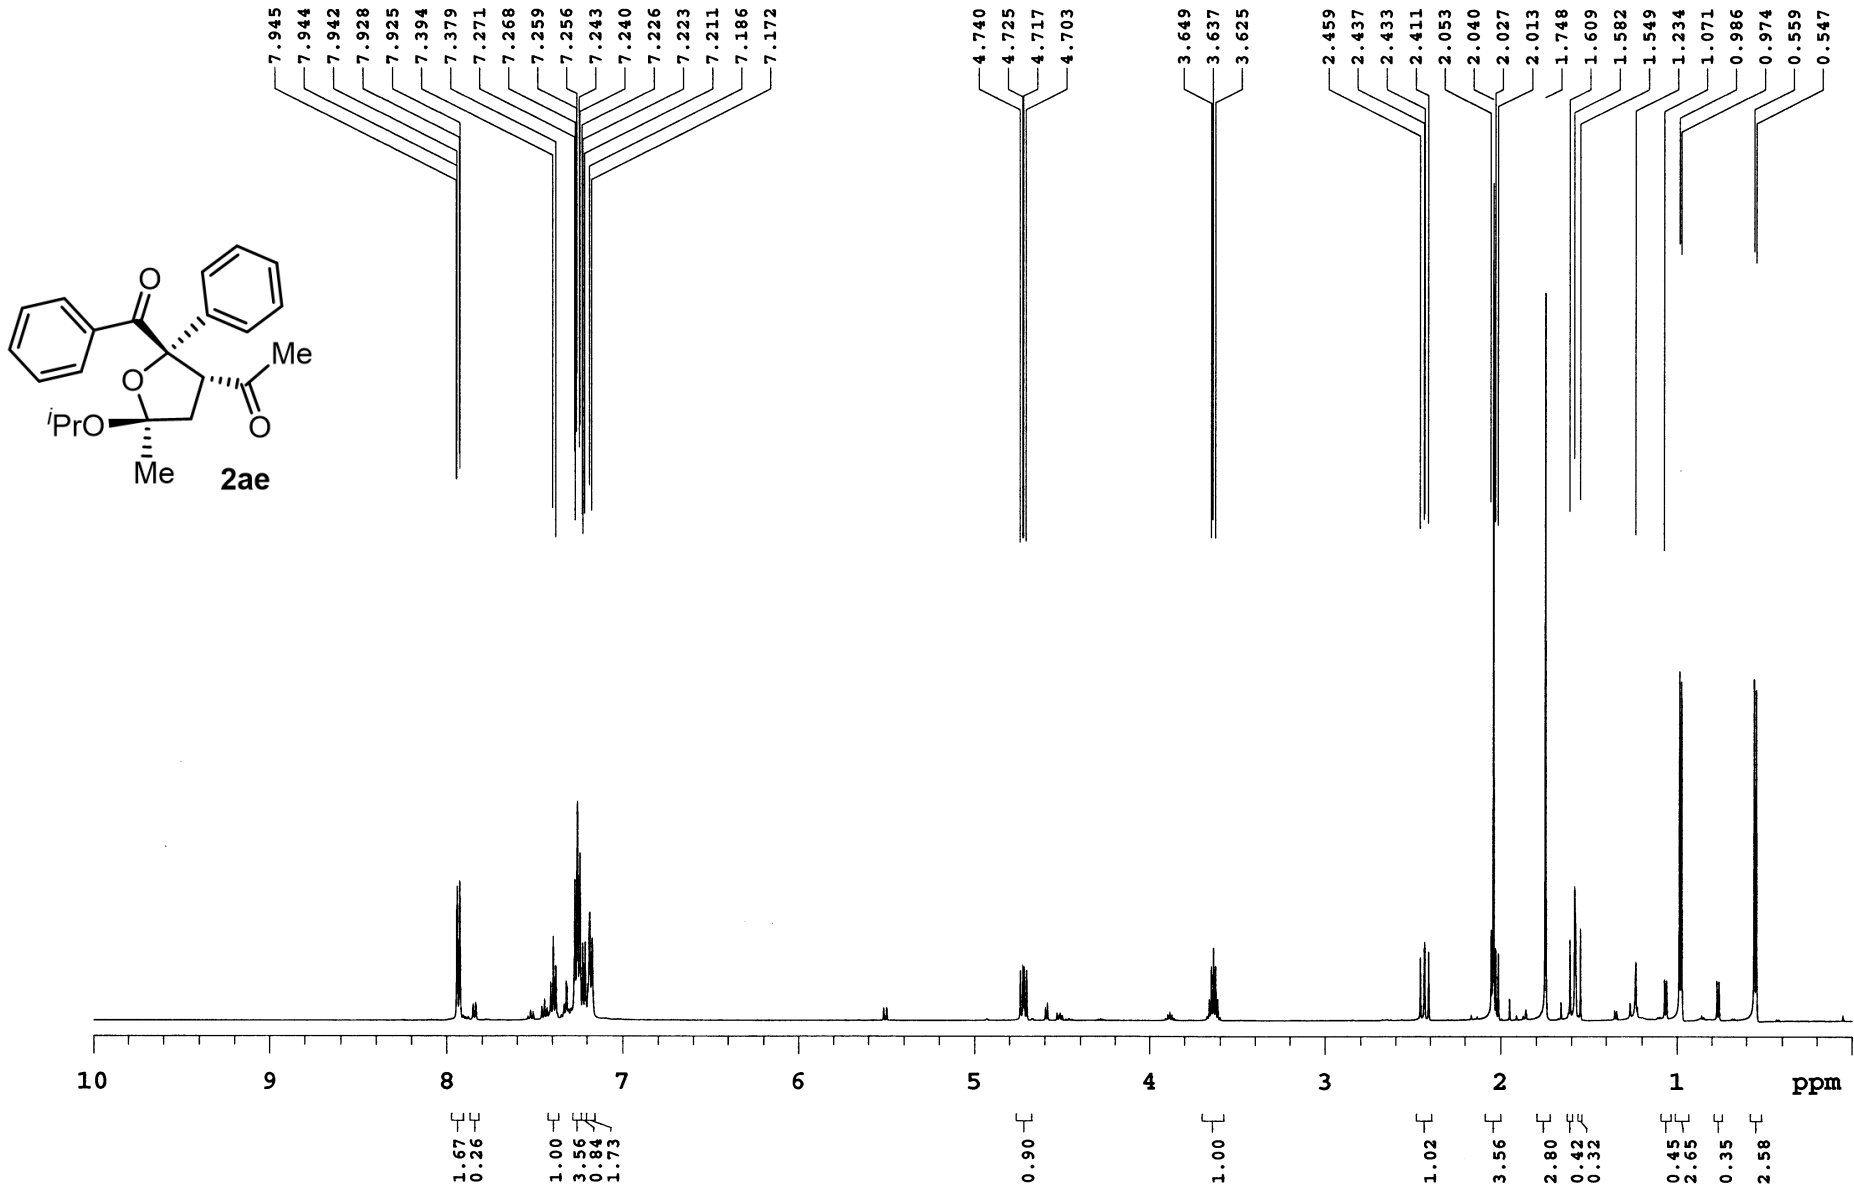

<sup>1</sup>H NMR (500 MHz, CDCl<sub>3</sub>) of compound **2ae**

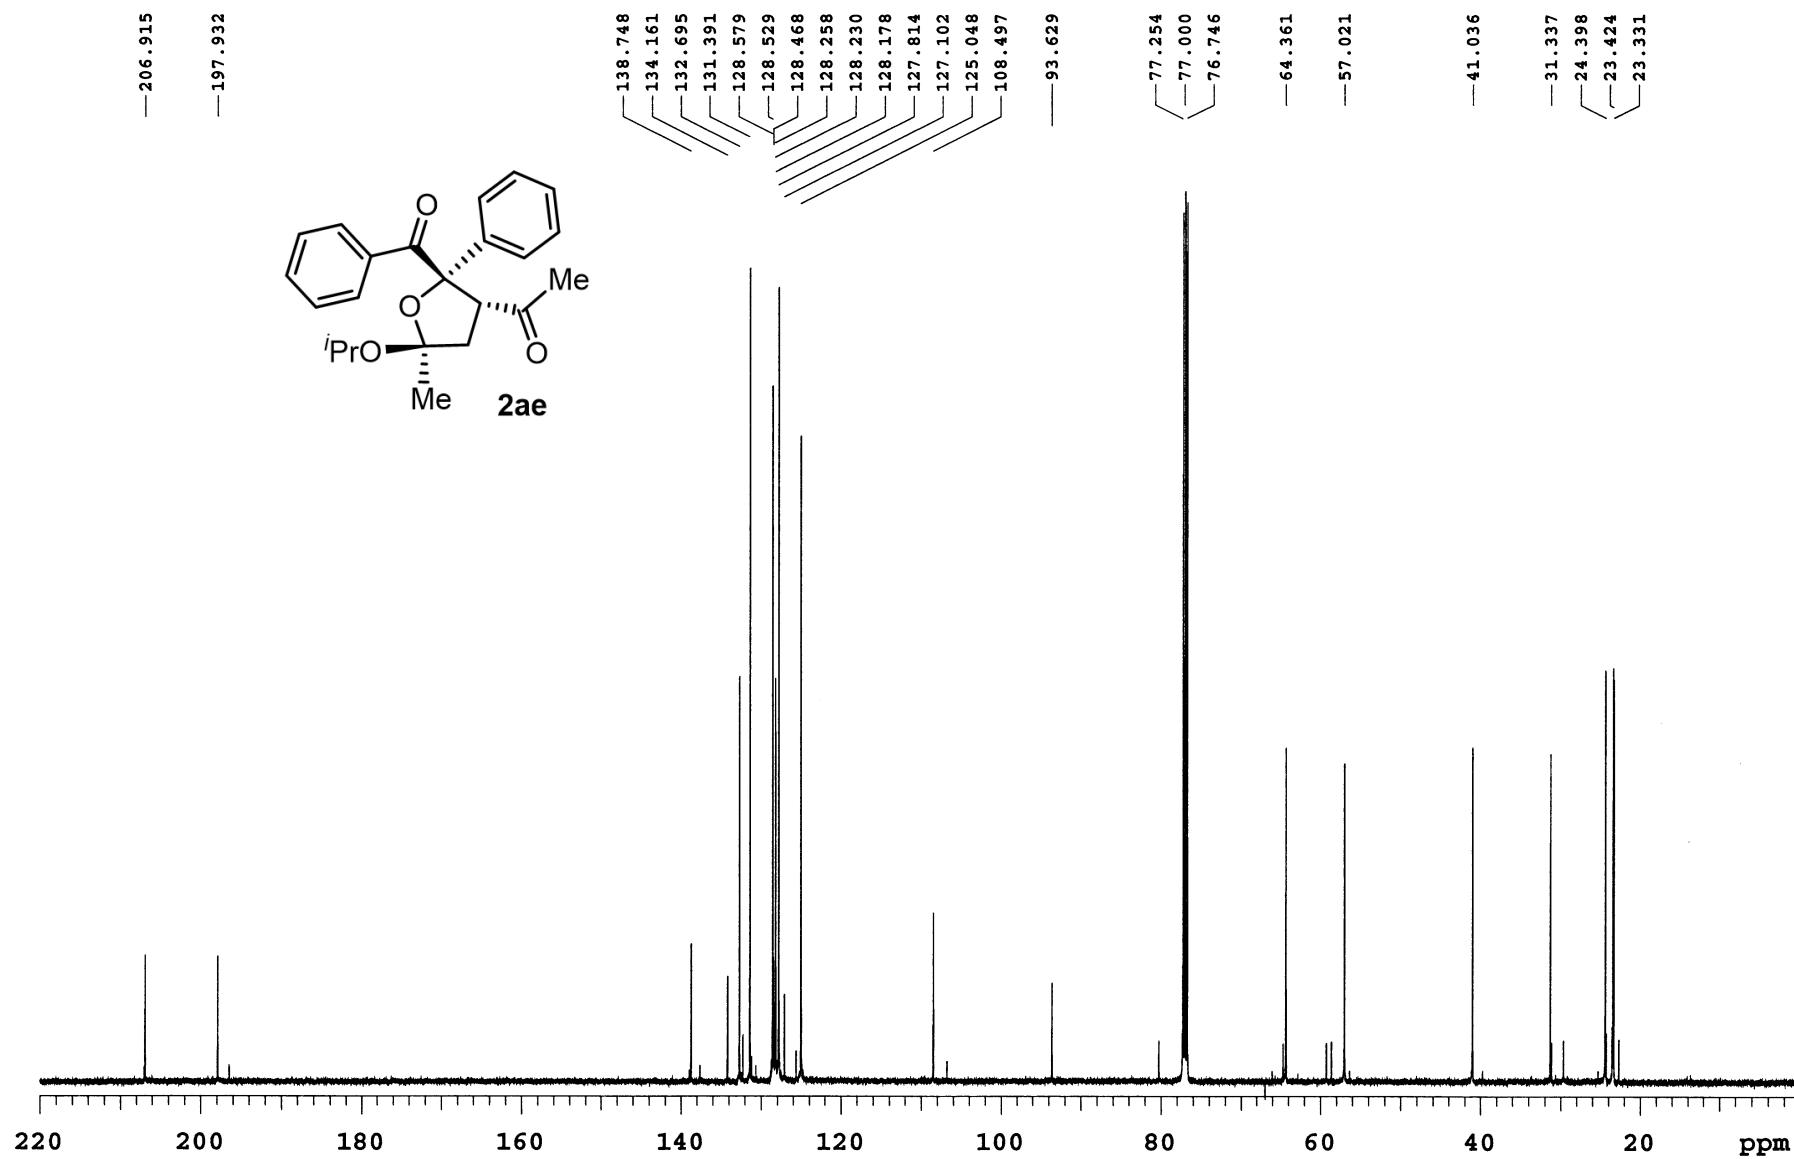

<sup>13</sup>C NMR (125 MHz, CDCl<sub>3</sub>) of compound 2ae

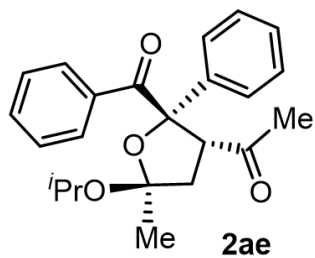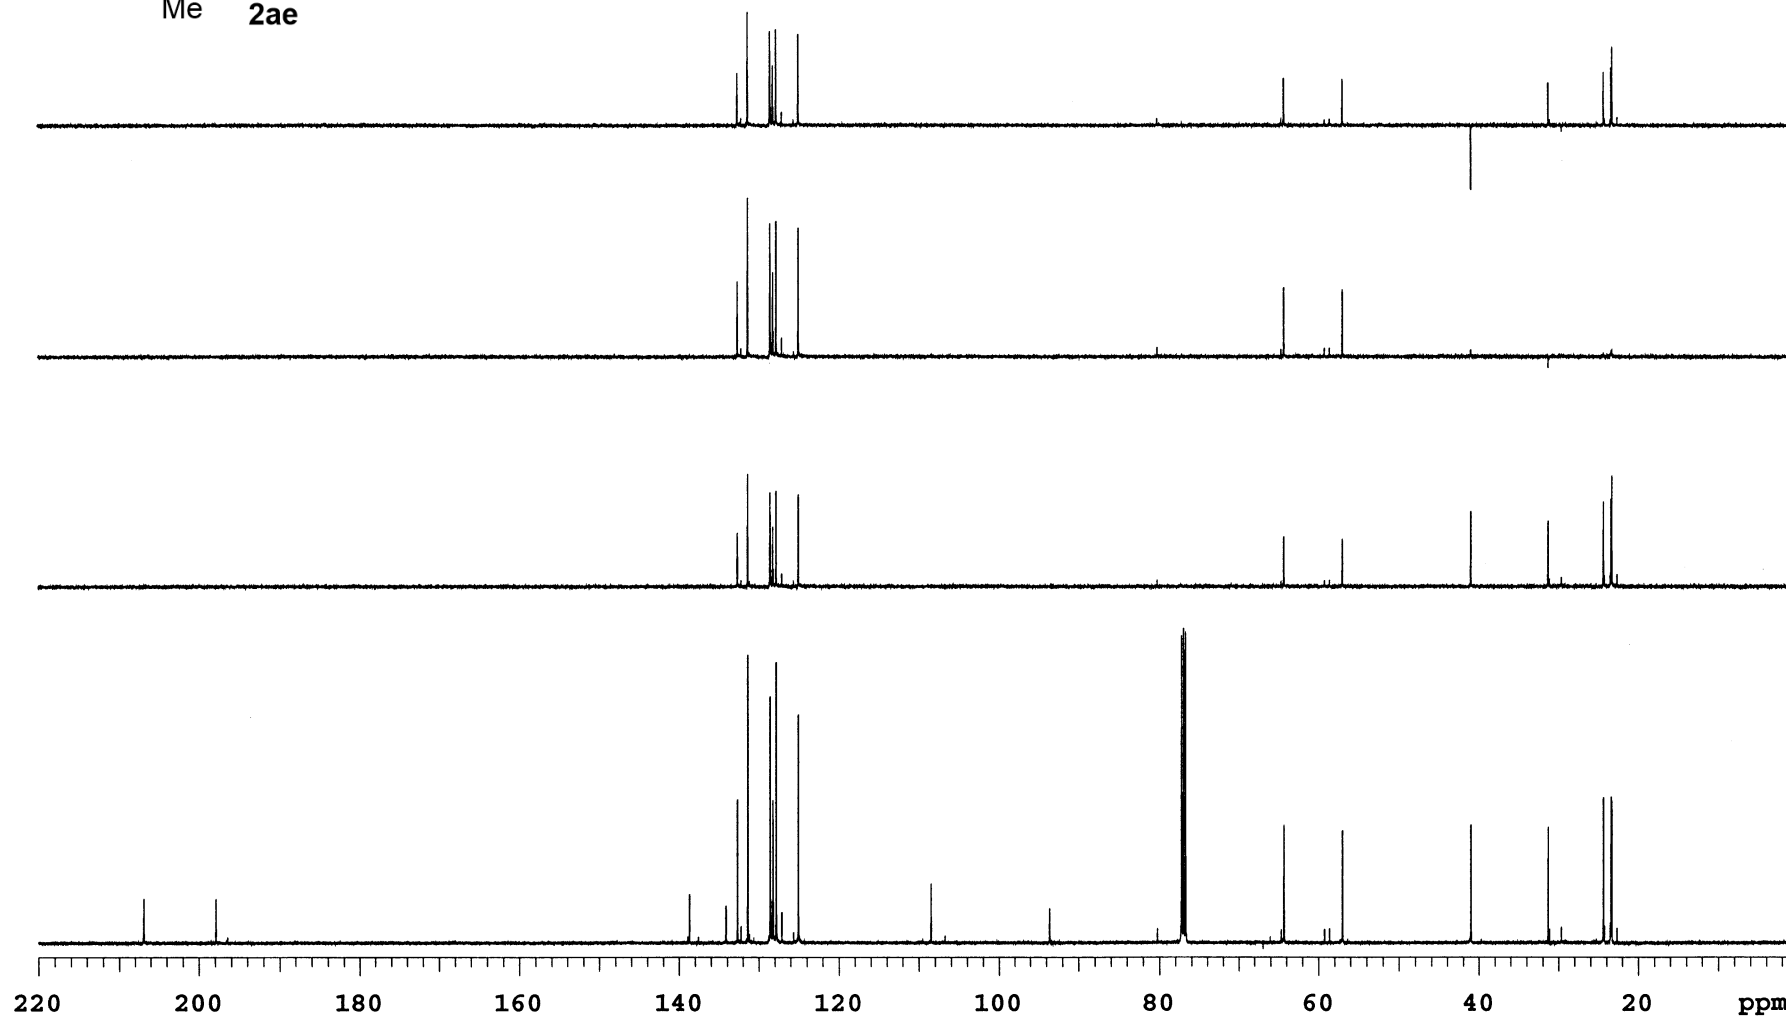

DEPT of compound 2ae

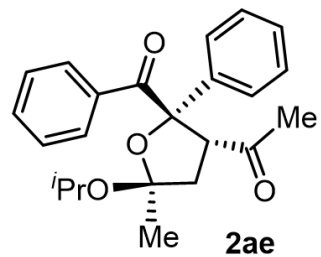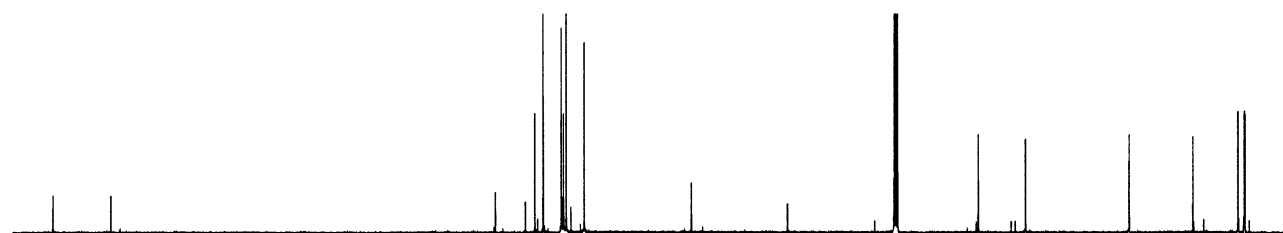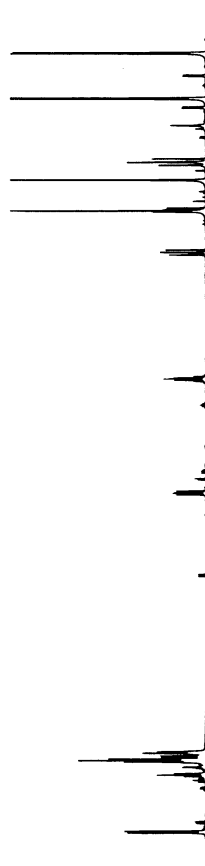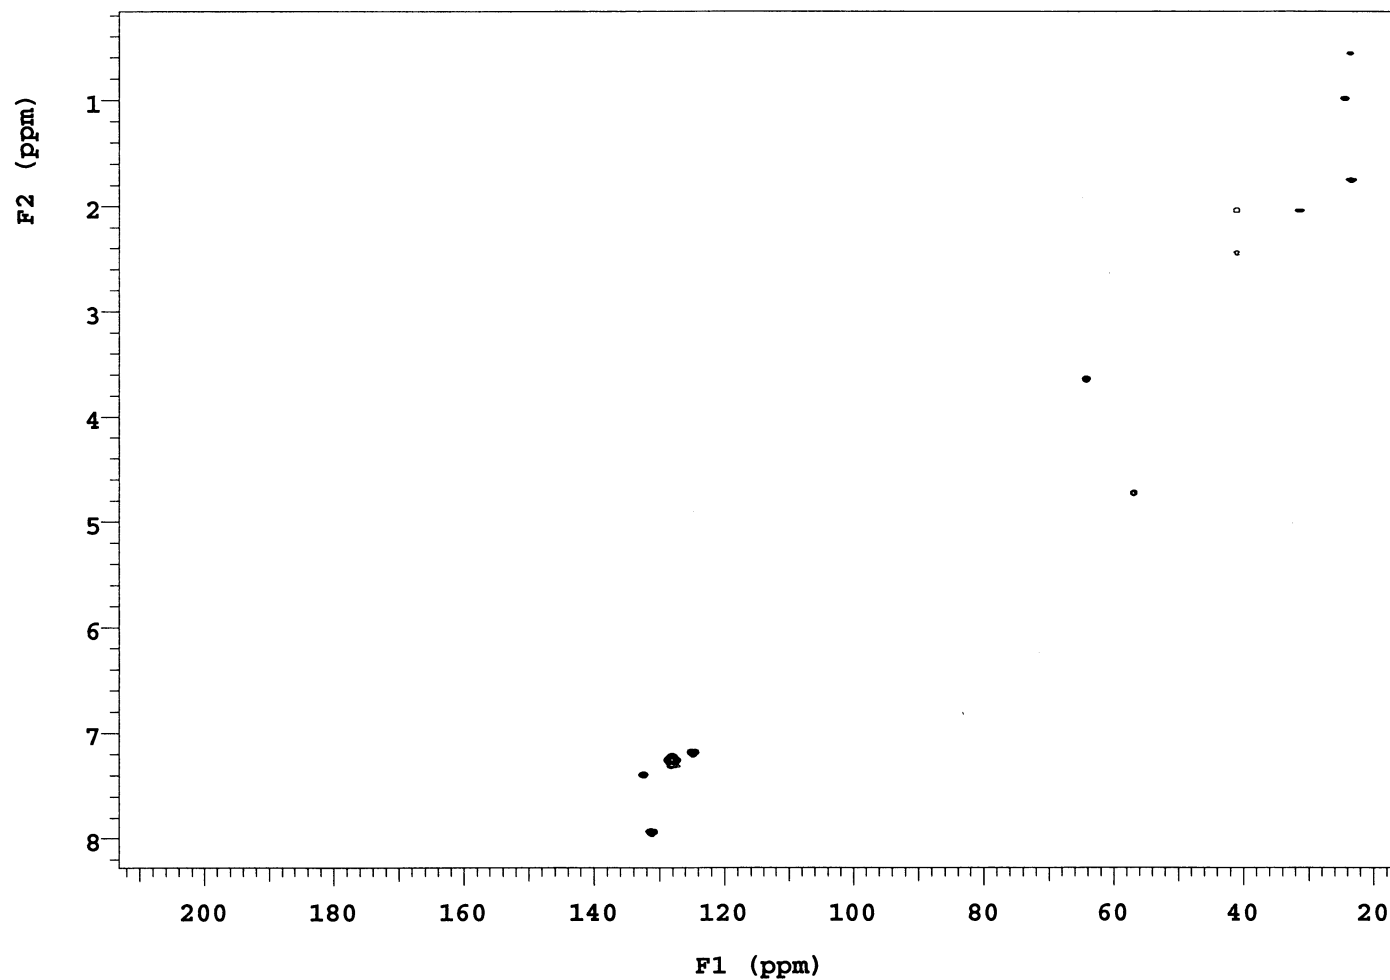

HSQC of compound 2ae

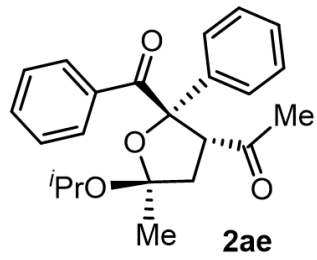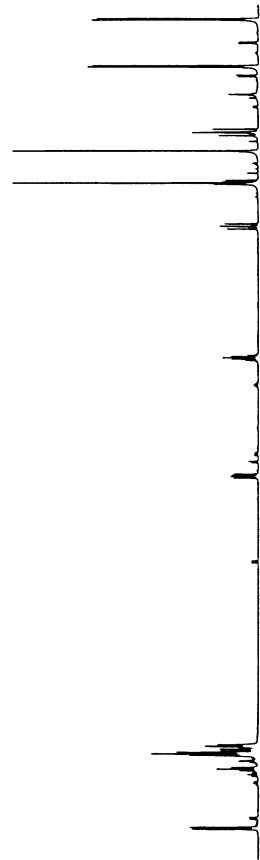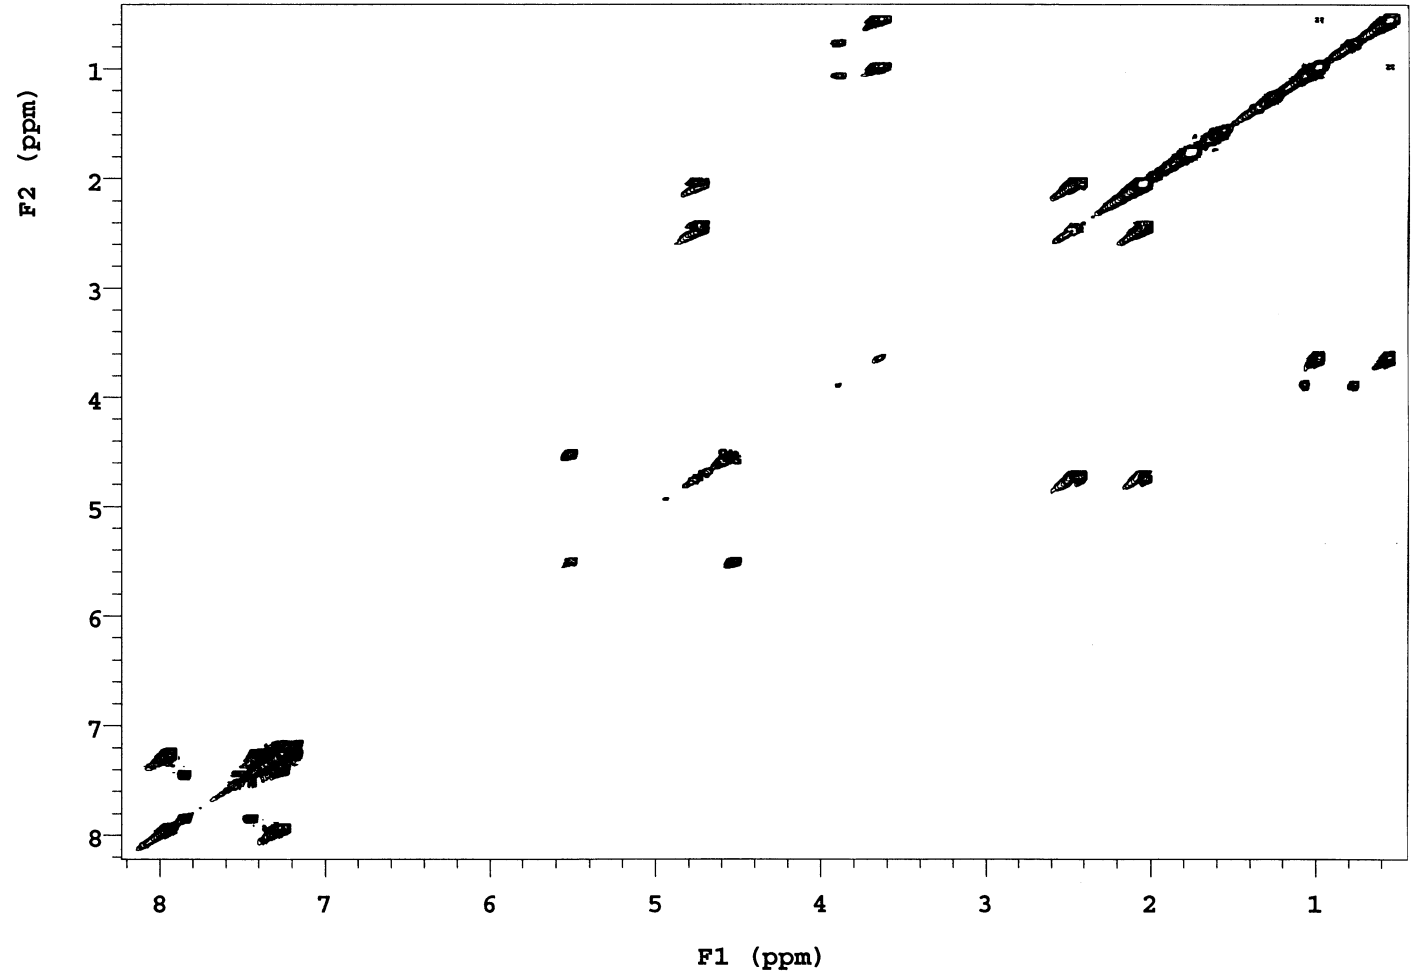

COSY of compound 2ae



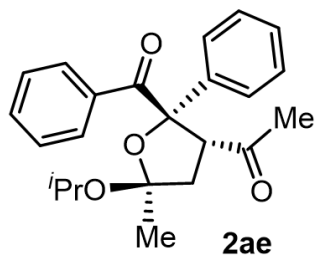

2ae

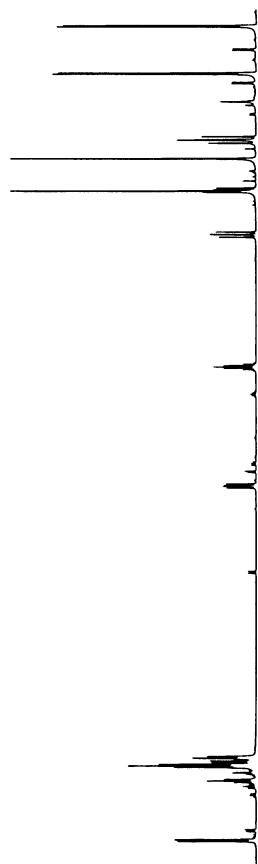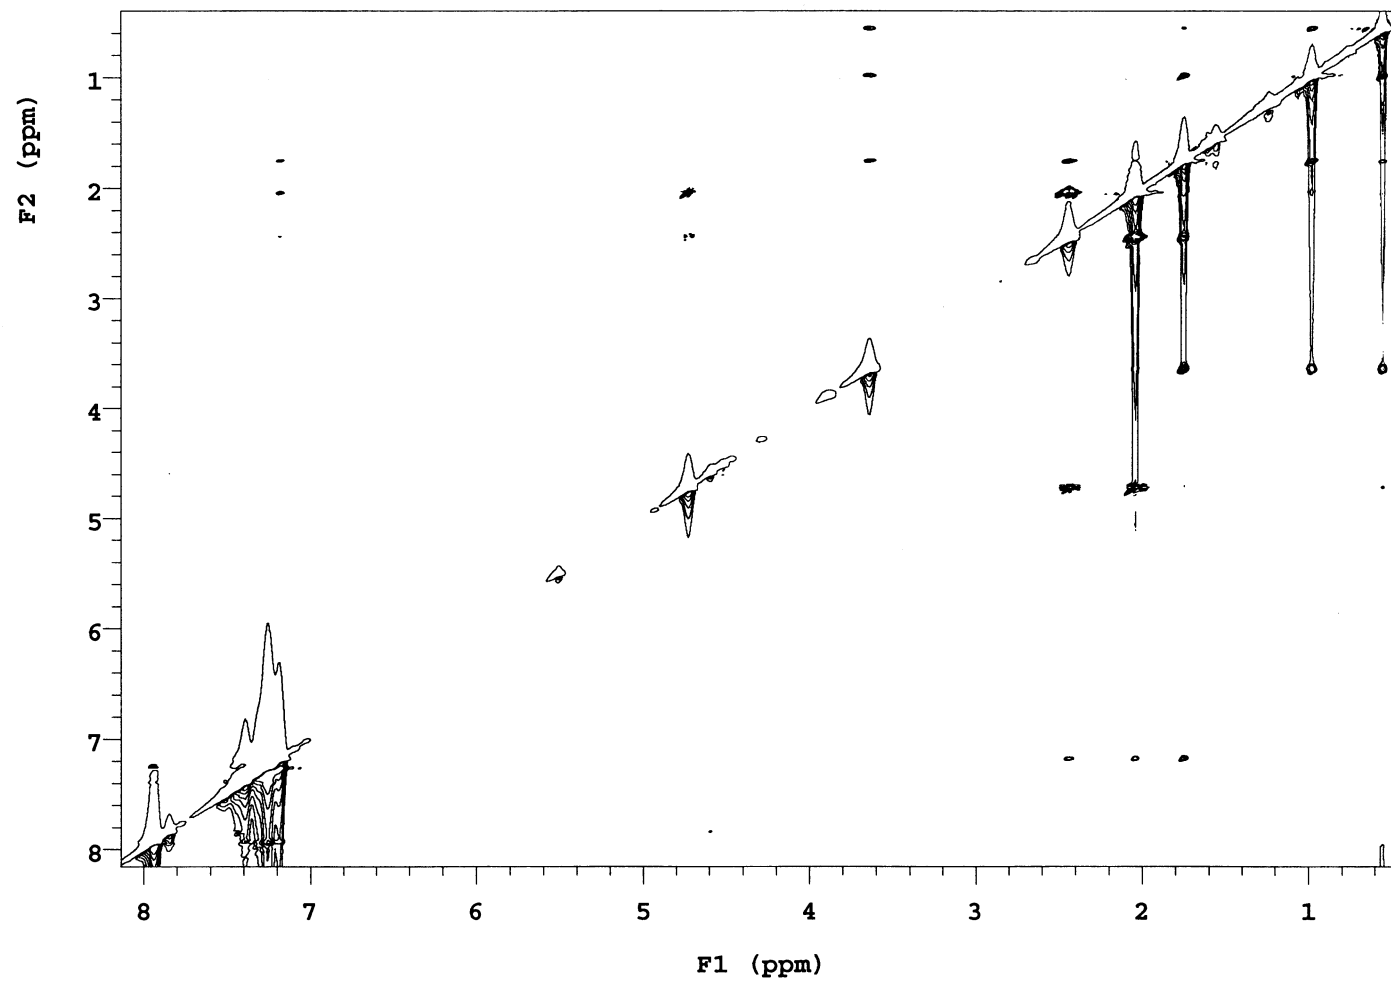

NOESY of compound 2ae

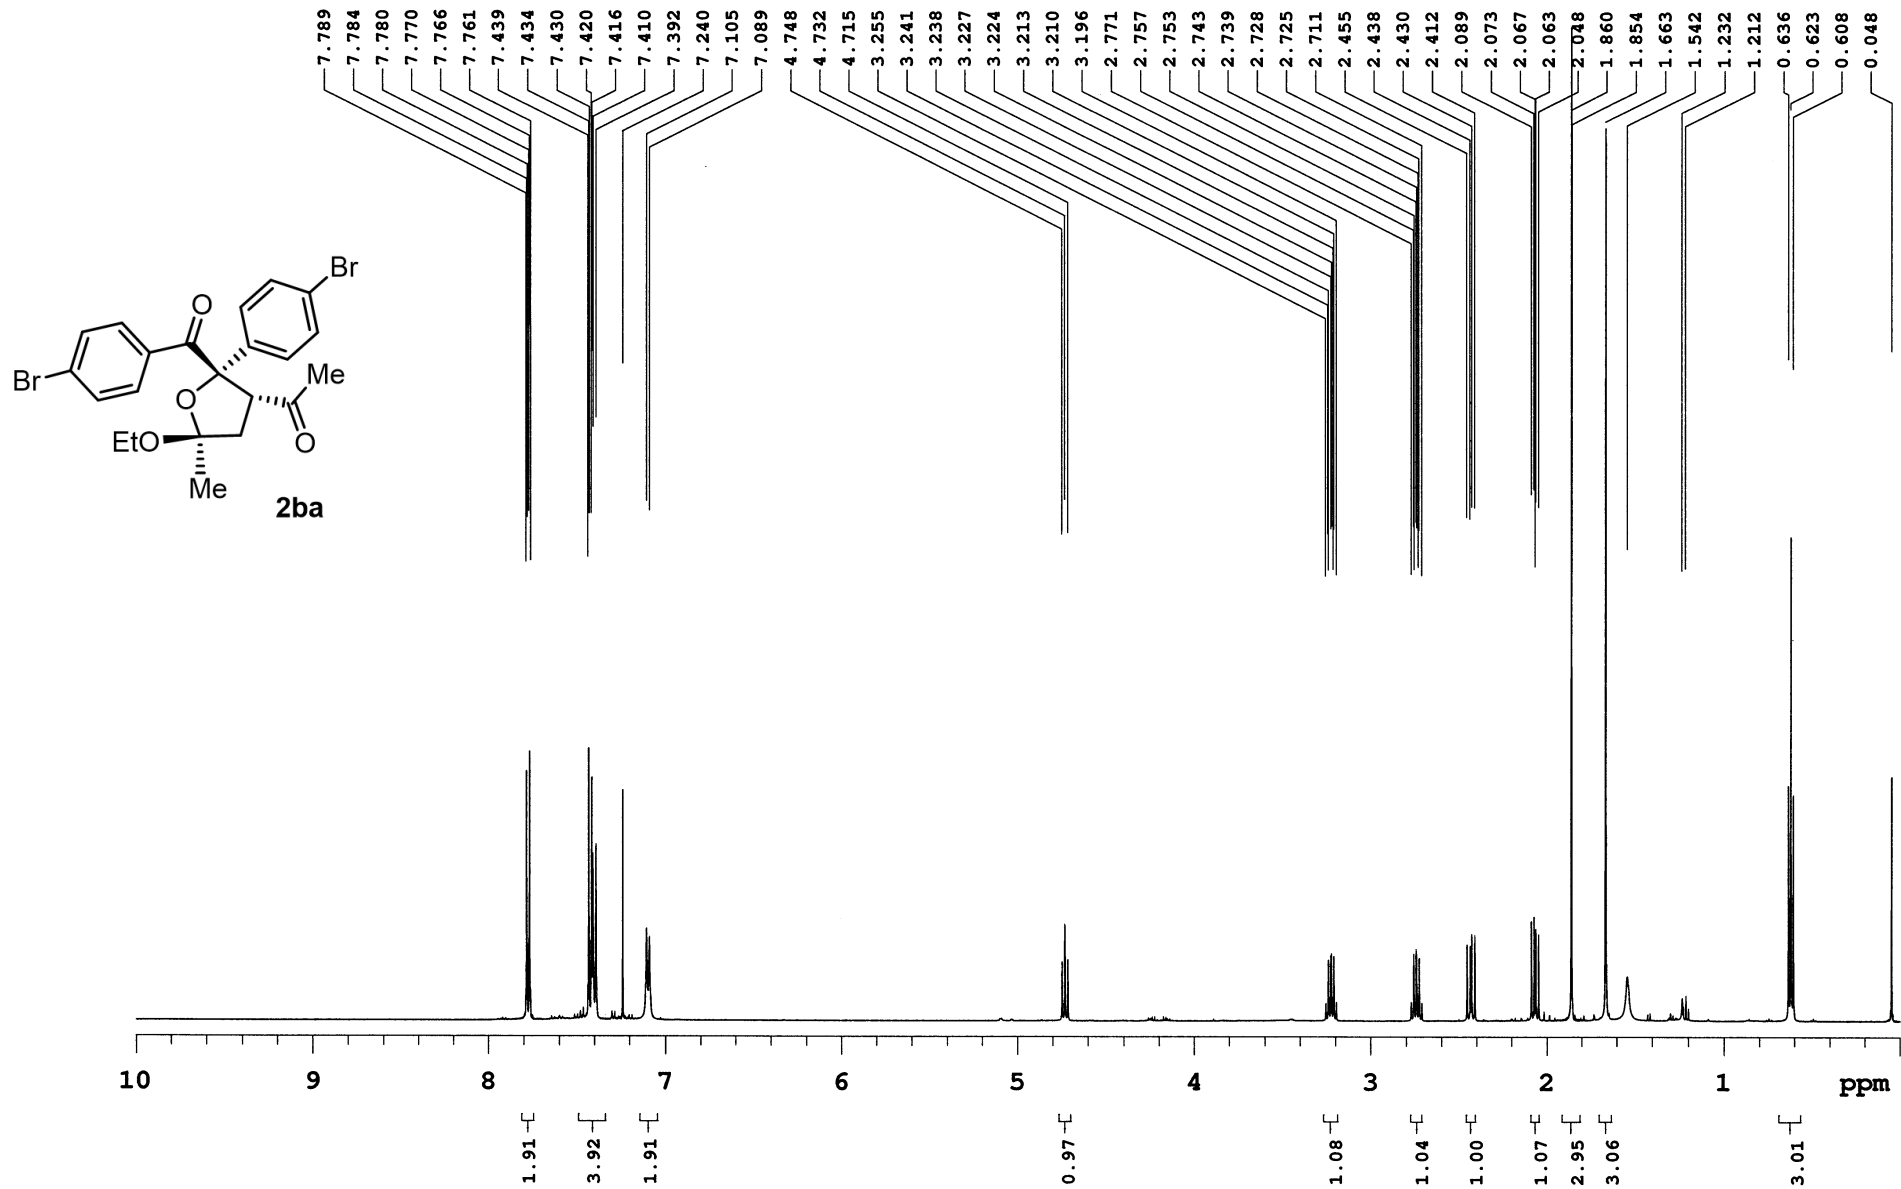

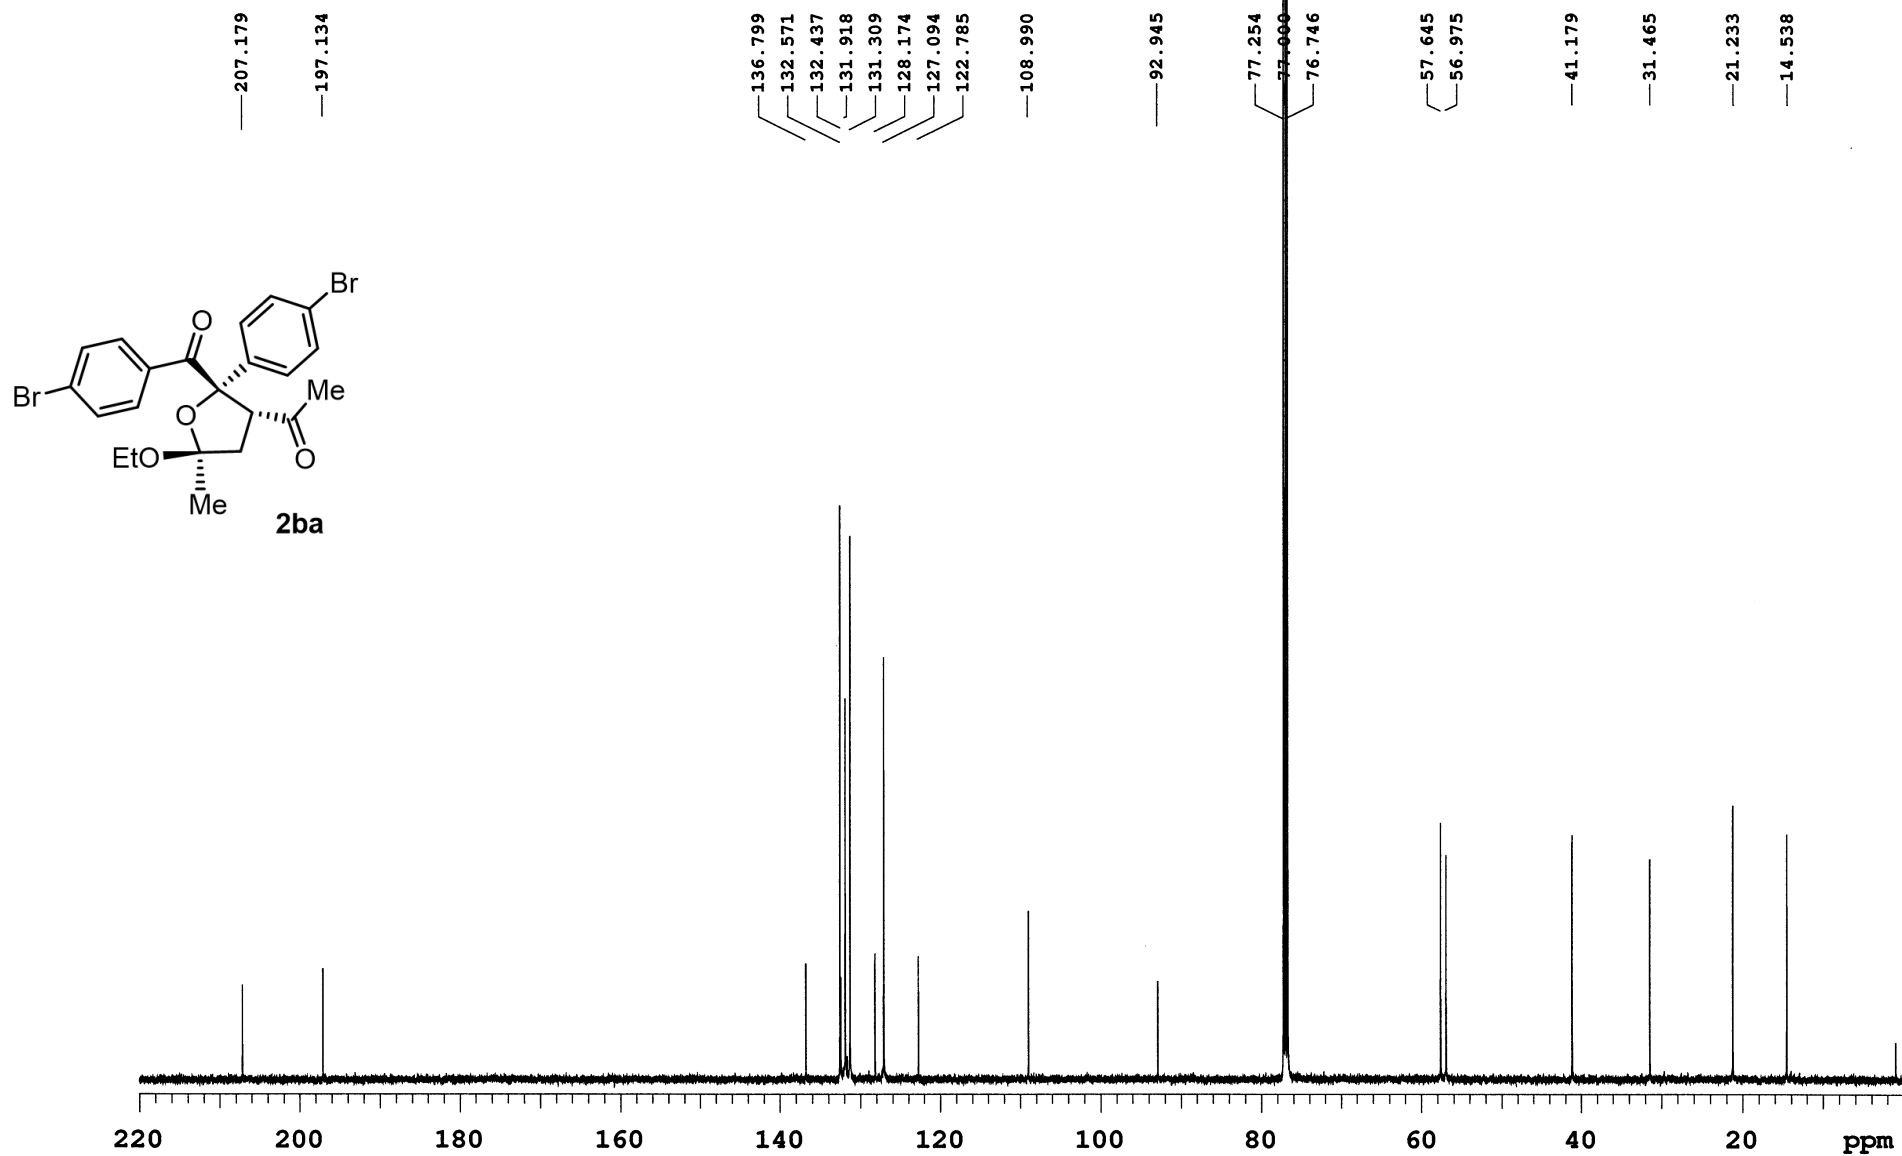

13C NMR (125 MHz, CDCl3) of compound 2ba

IRR-02-156

Sample Name **IRR-02-156**  
Date collected **2023-11-28**Pulse sequence **DEPT**  
Solvent **cdcl3**Temperature **25**  
Spectrometer **Agilent-NMR-inova500**Study owner **vnmr2**  
Operator **vnmr2**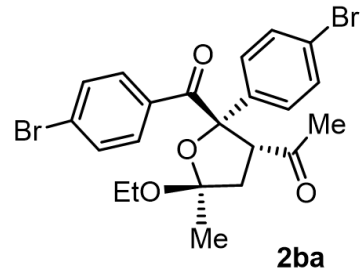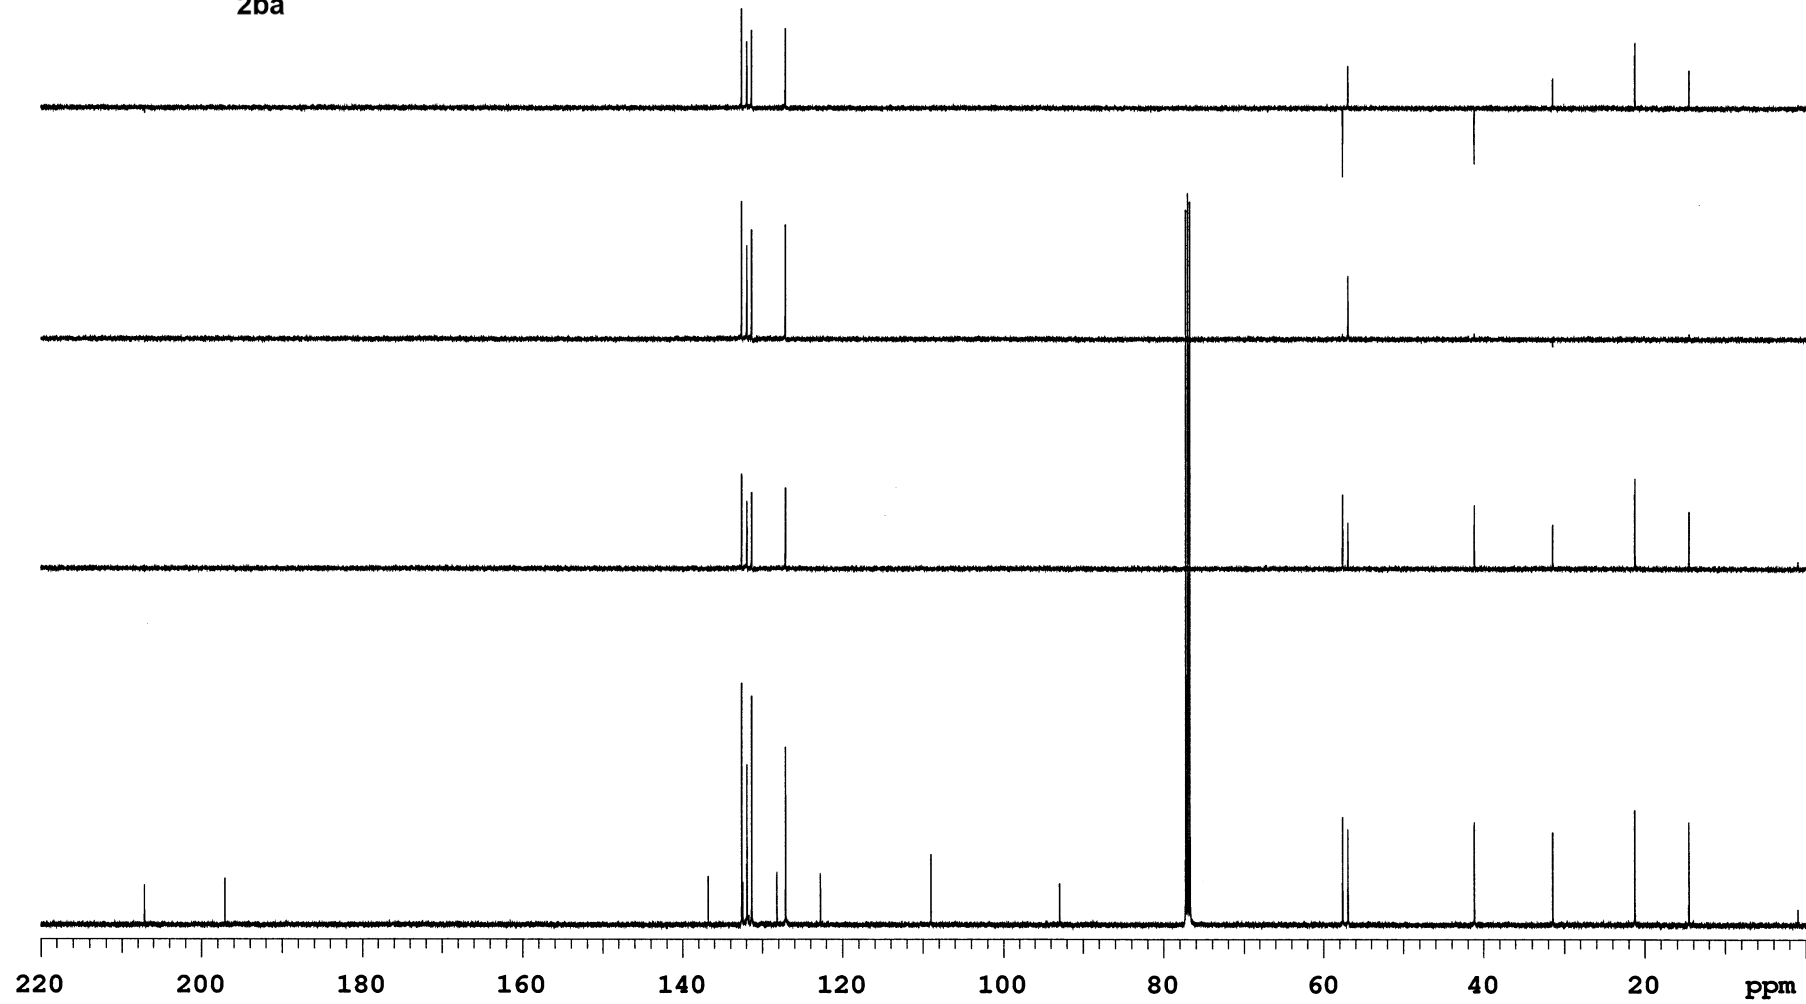

DEPT of compound 2ba

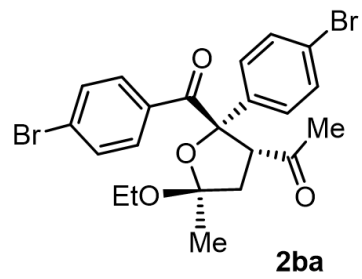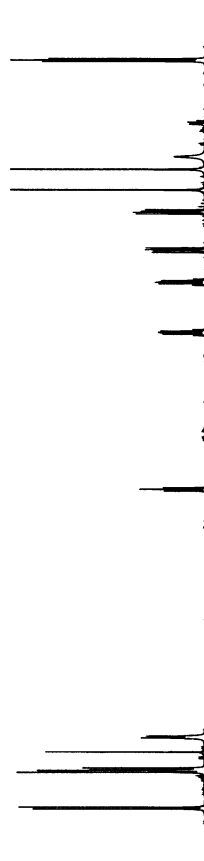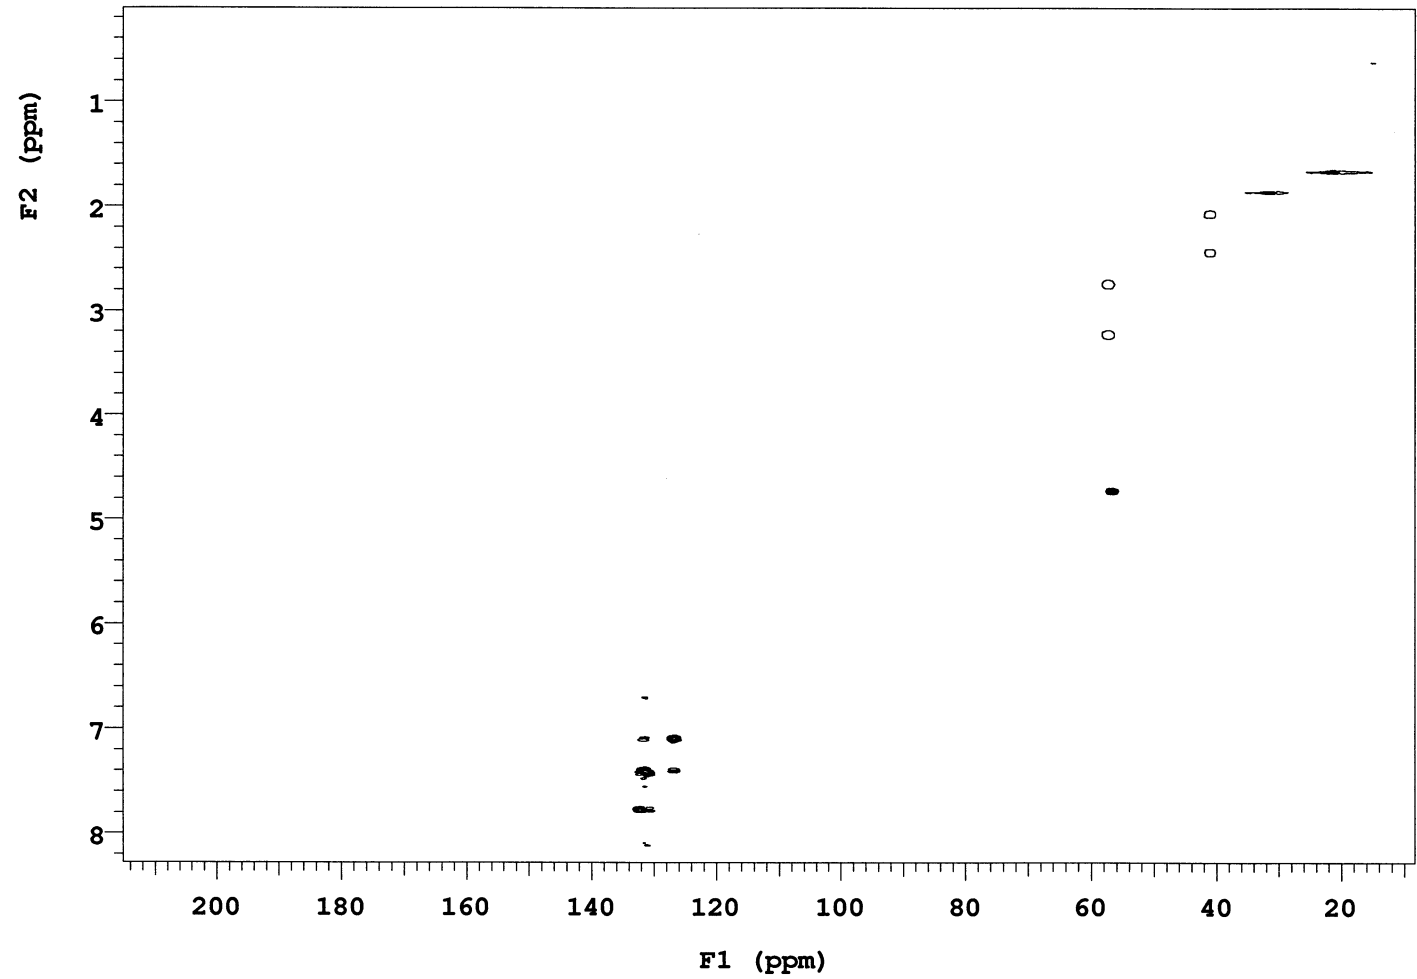

HSQC of compound 2ba

IRR-02-156

Sample Name IRR-02-156  
Date collected 2023-11-29Pulse sequence gCOSY  
Solvent cdcl3Temperature 25  
Spectrometer Agilent-NMR-inova500Study owner vnmr2  
Operator vnmr2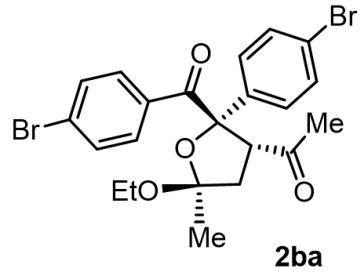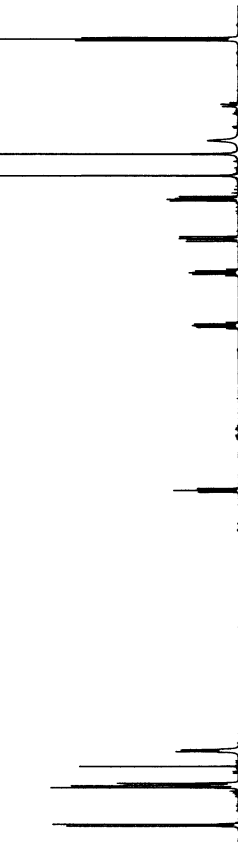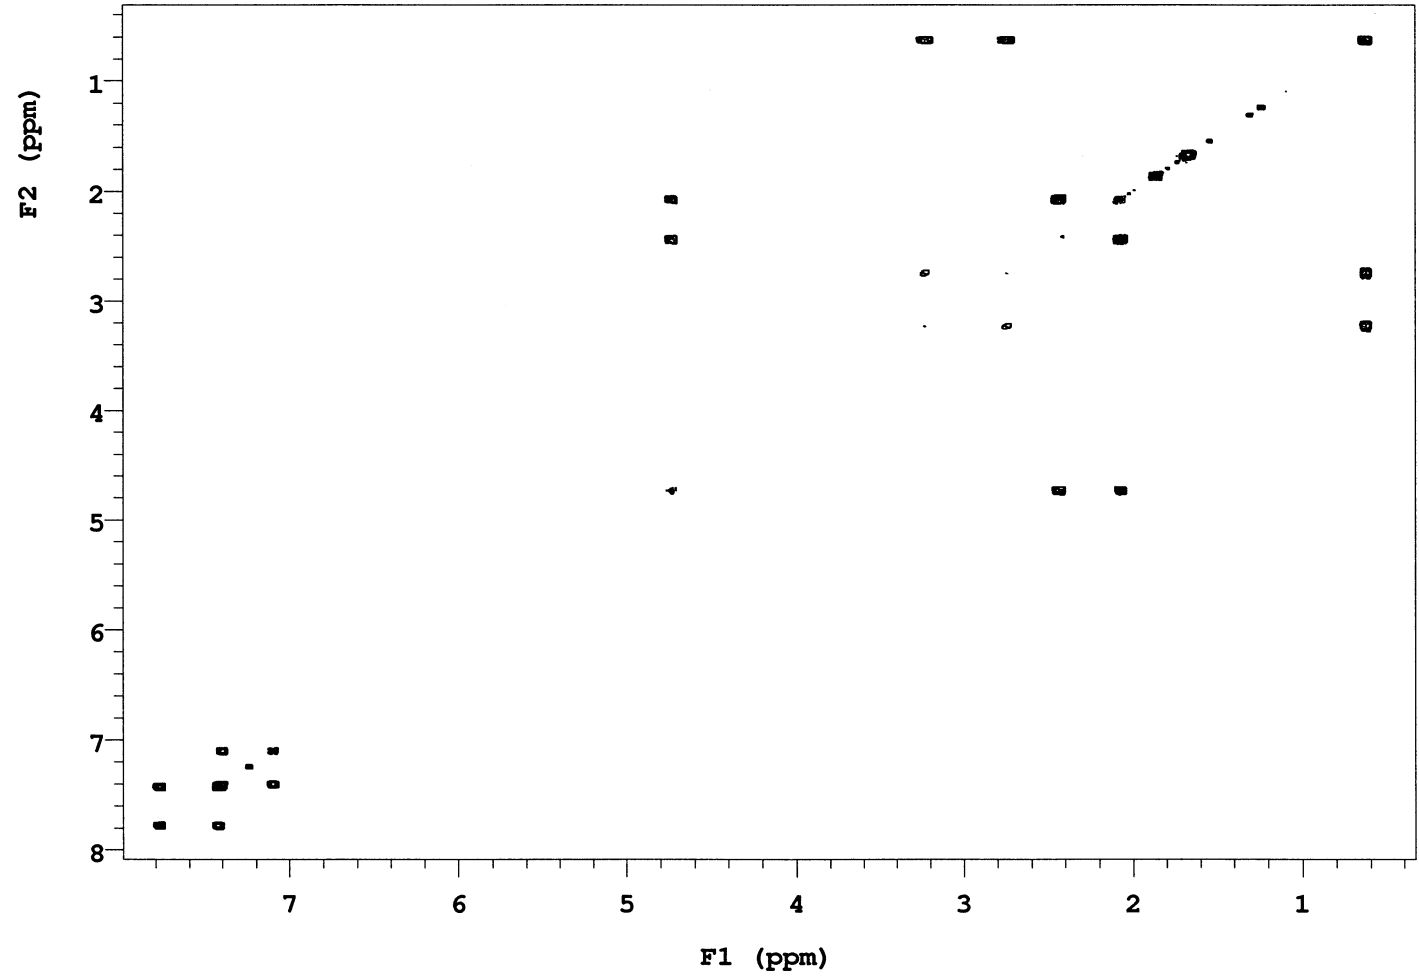

COSY of compound 2ba

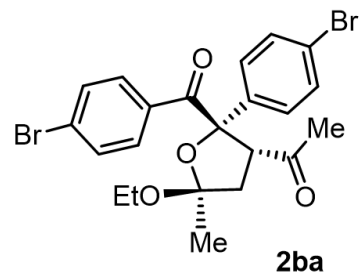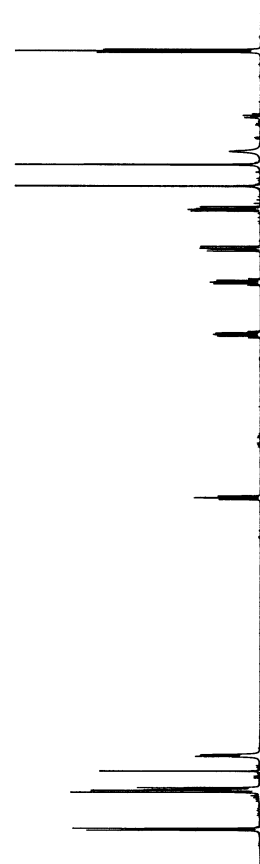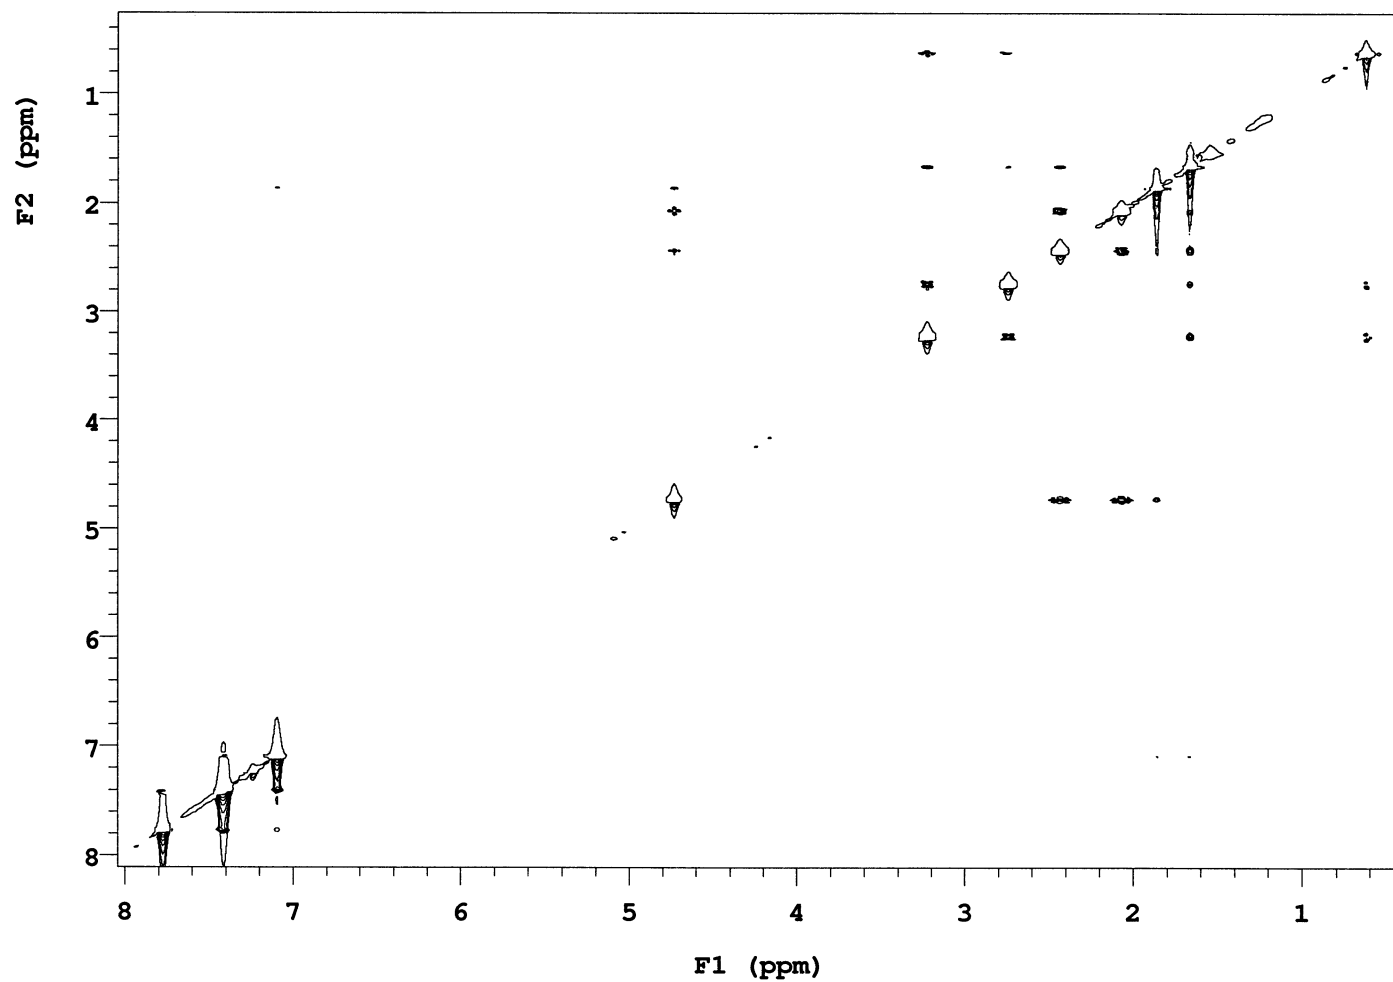

NOESY of compound 2ba

Sample Name IRR-120-N  
Date collected 2024-07-08

Pulse sequence PROTON  
Solvent cdcl3

Temperature 25  
Spectrometer Agilent-NMR-inova500

Study owner vnmr2  
Operator vnmr2

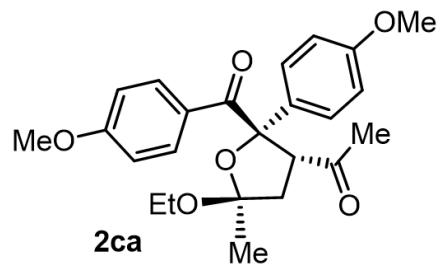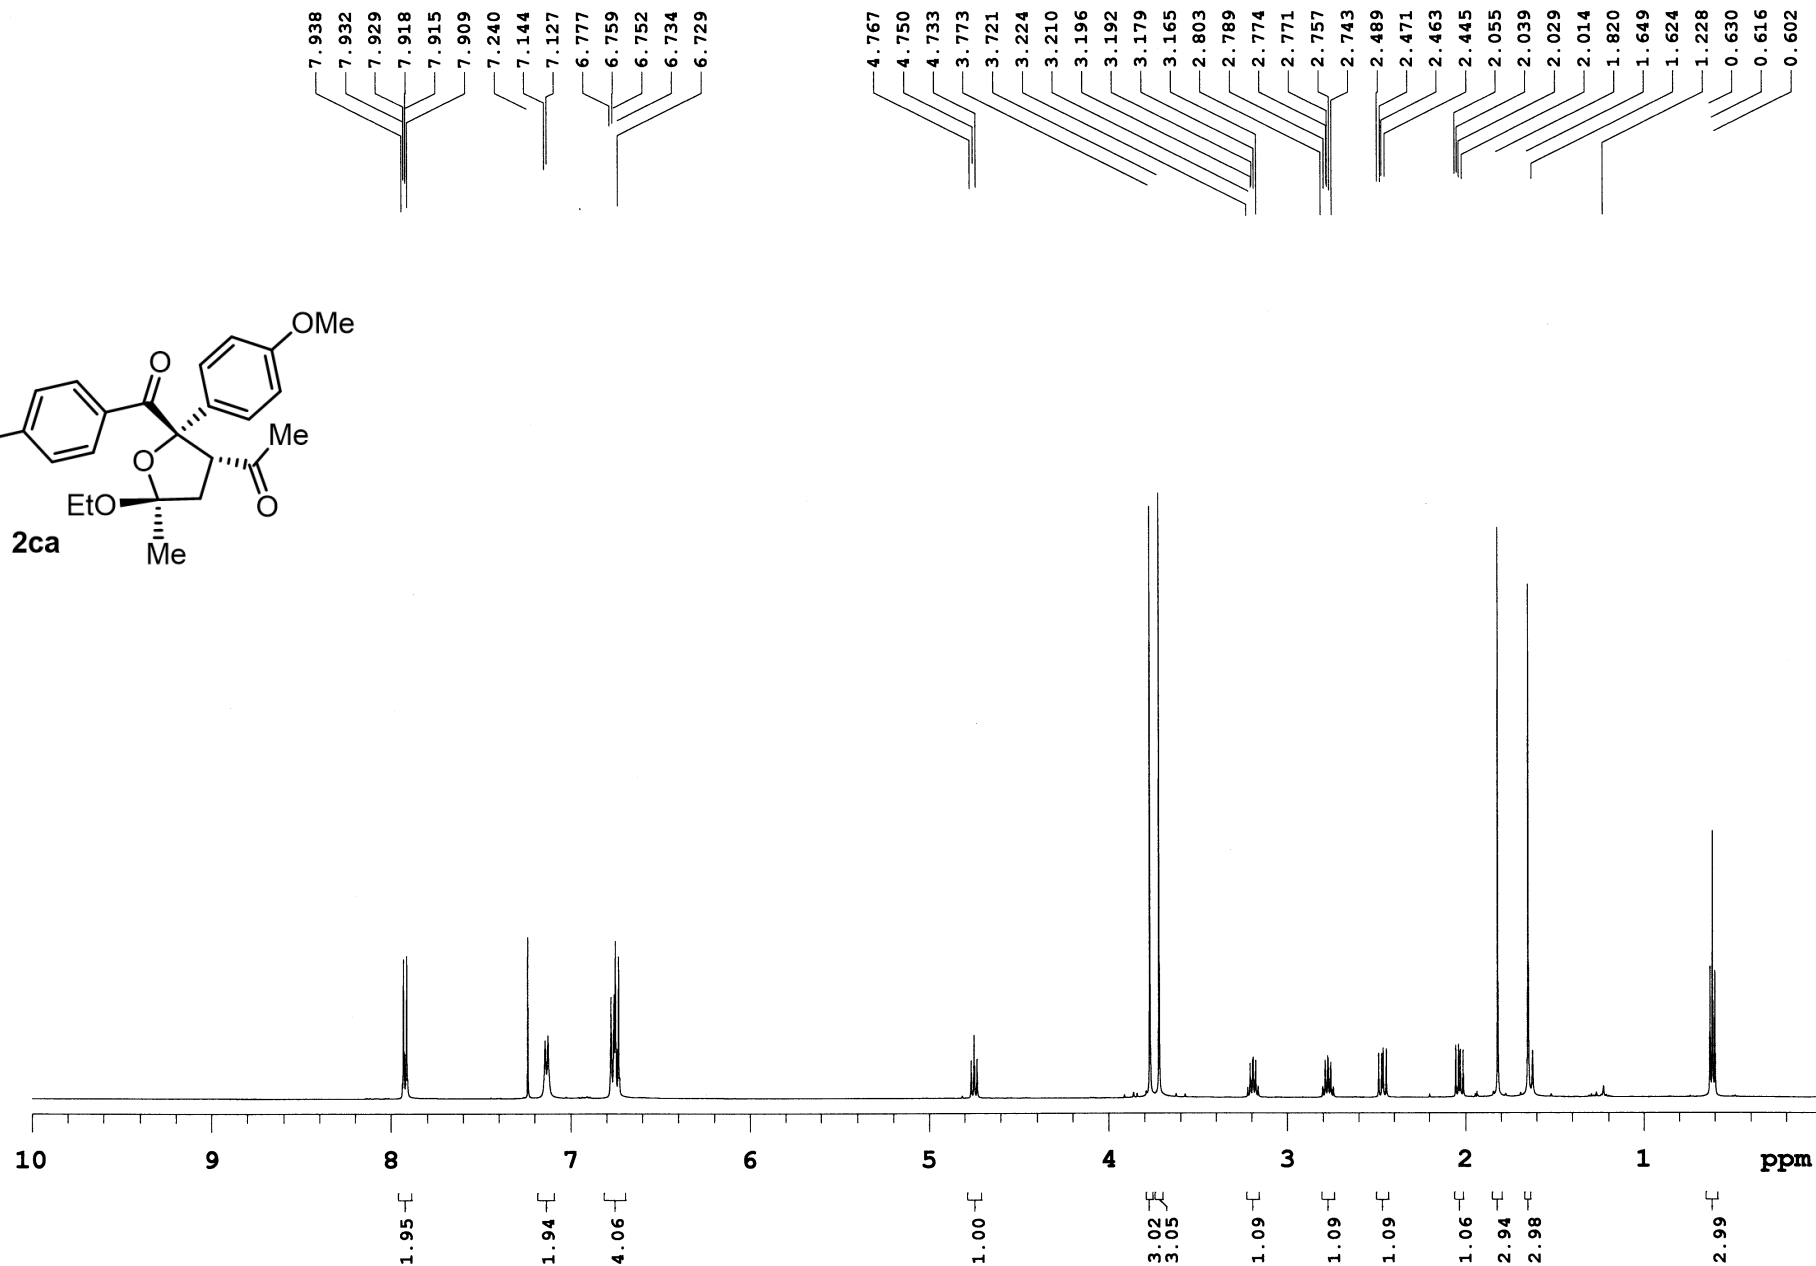



Sample Name **IRR-120-N**  
Date collected **2024-07-08**Pulse sequence **CARBON**  
Solvent **cdcl3**Temperature **25**  
Spectrometer **Agilent-NMR-inova500**Study owner **vnmr2**  
Operator **vnmr2**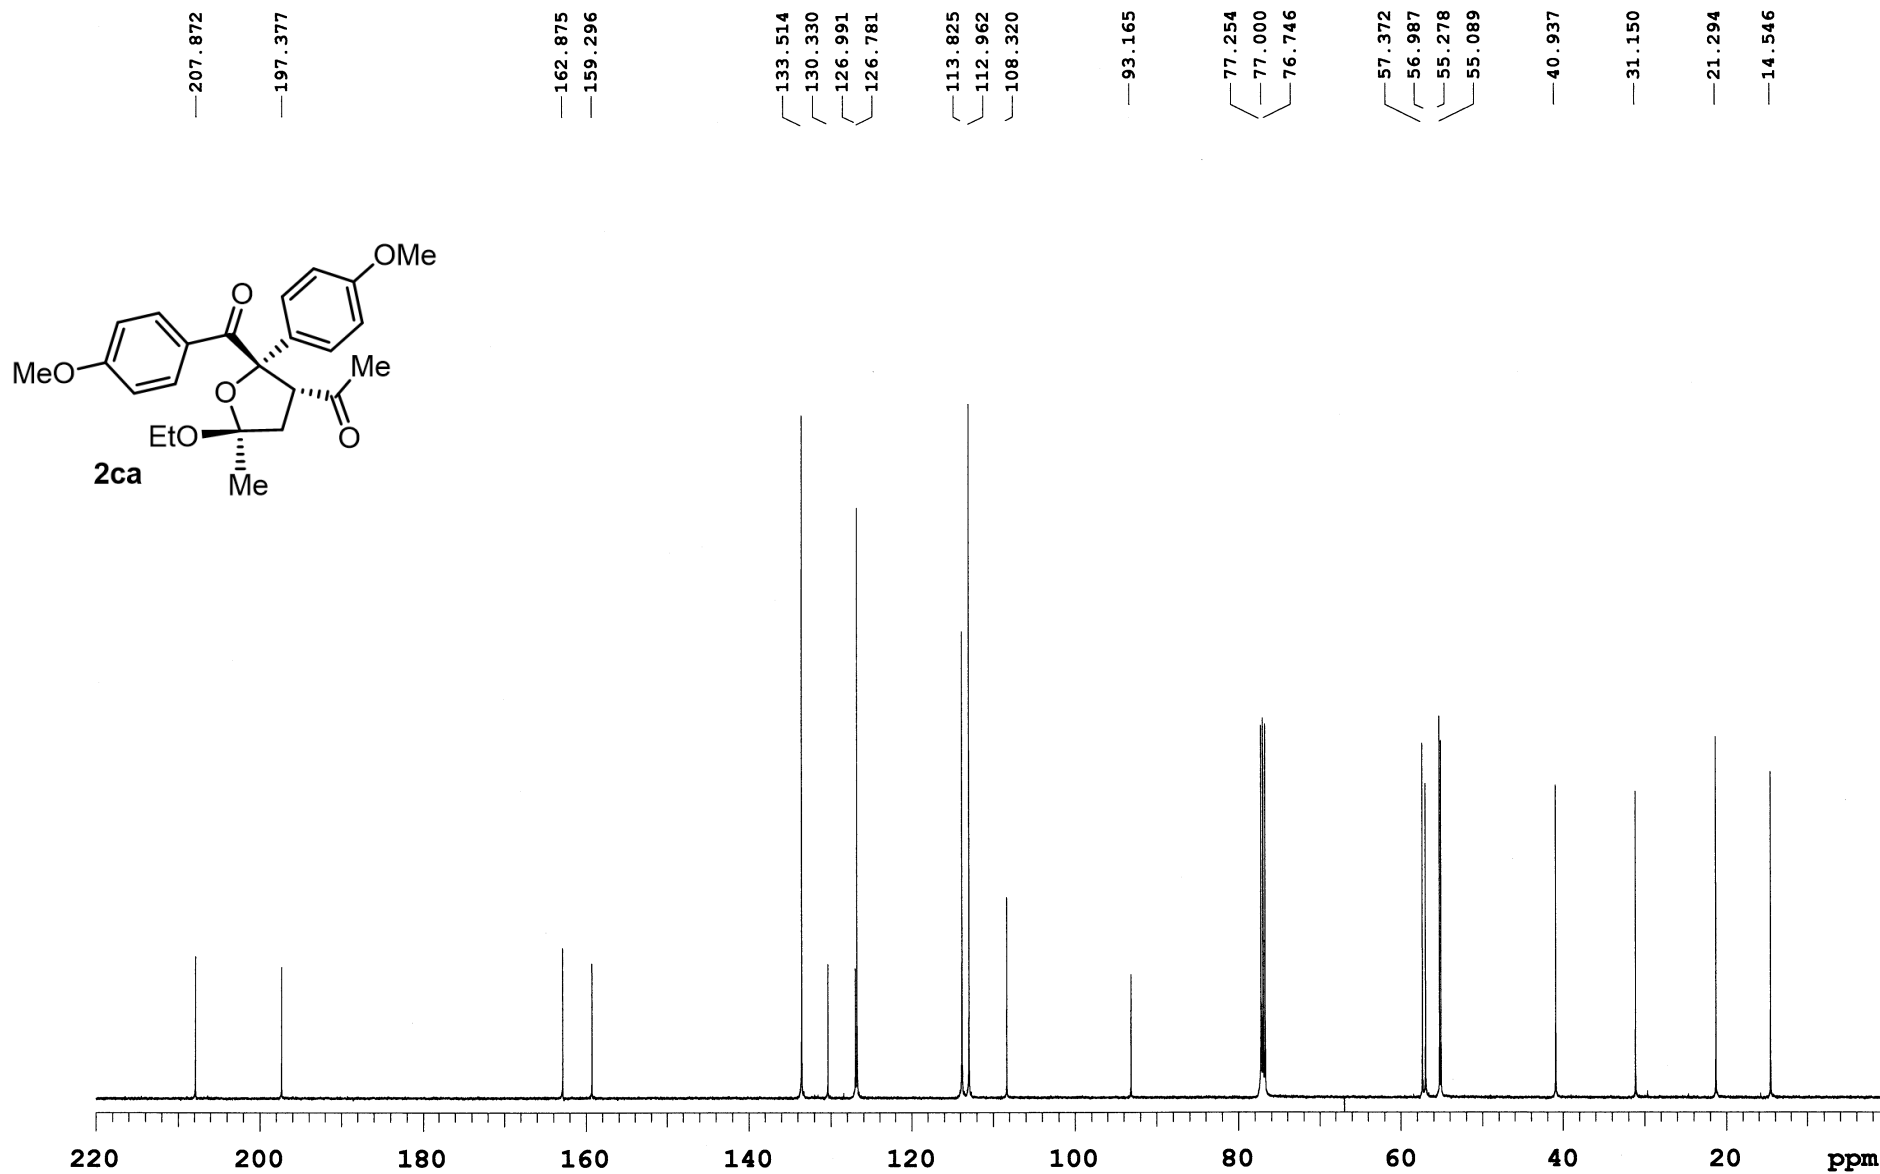

$^{13}\text{C}$  NMR (125 MHz,  $\text{CDCl}_3$ ) of compound **2ca**

Sample Name **IRR-120-N**  
Date collected **2024-07-09**

Pulse sequence **DEPT**  
Solvent **cdcl3**

Temperature **25**  
Spectrometer **Agilent-NMR-inova500**

Study owner **vnmr2**  
Operator **vnmr2**

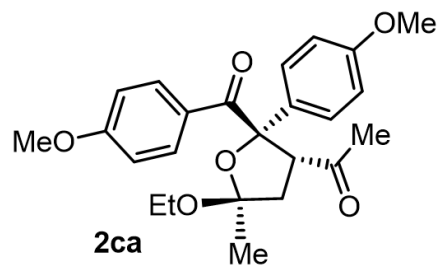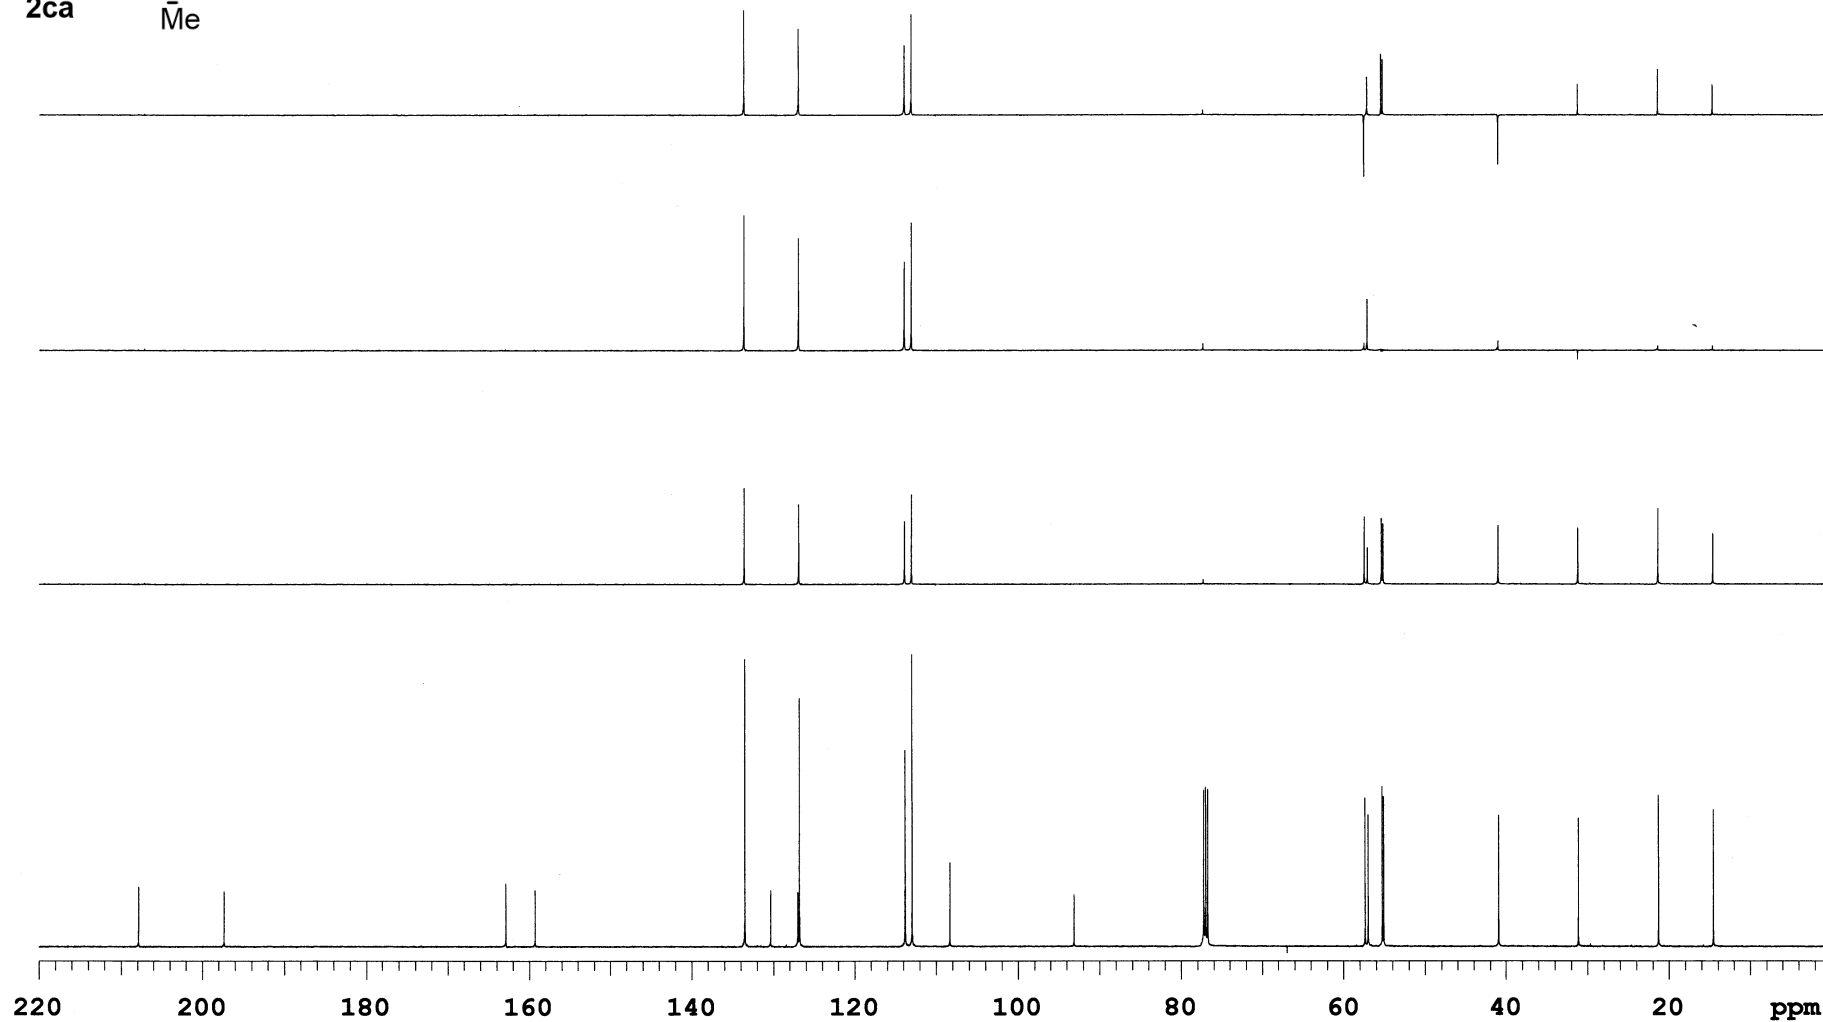

Sample Name **IRR-120-N**  
Date collected **2024-08-28**

Pulse sequence **gHSQC**  
Solvent **cdcl3**

Temperature **25**  
Spectrometer **Agilent-NMR-inova500**

Study owner **vnmr2**  
Operator **vnmr2**

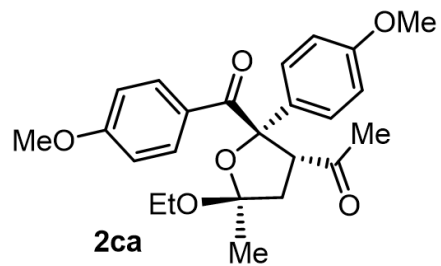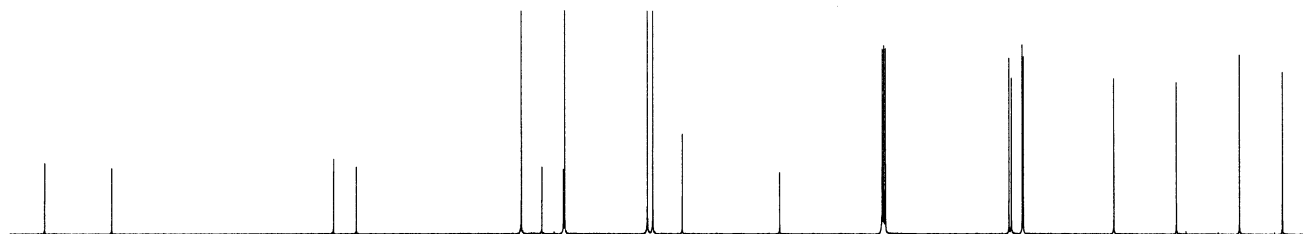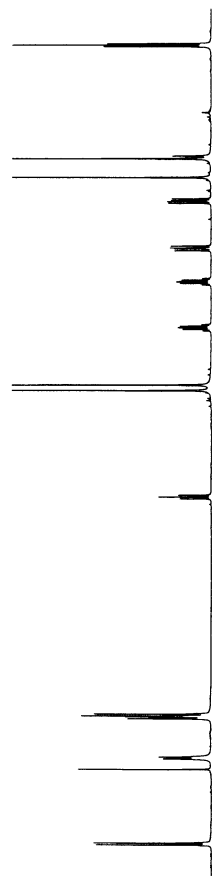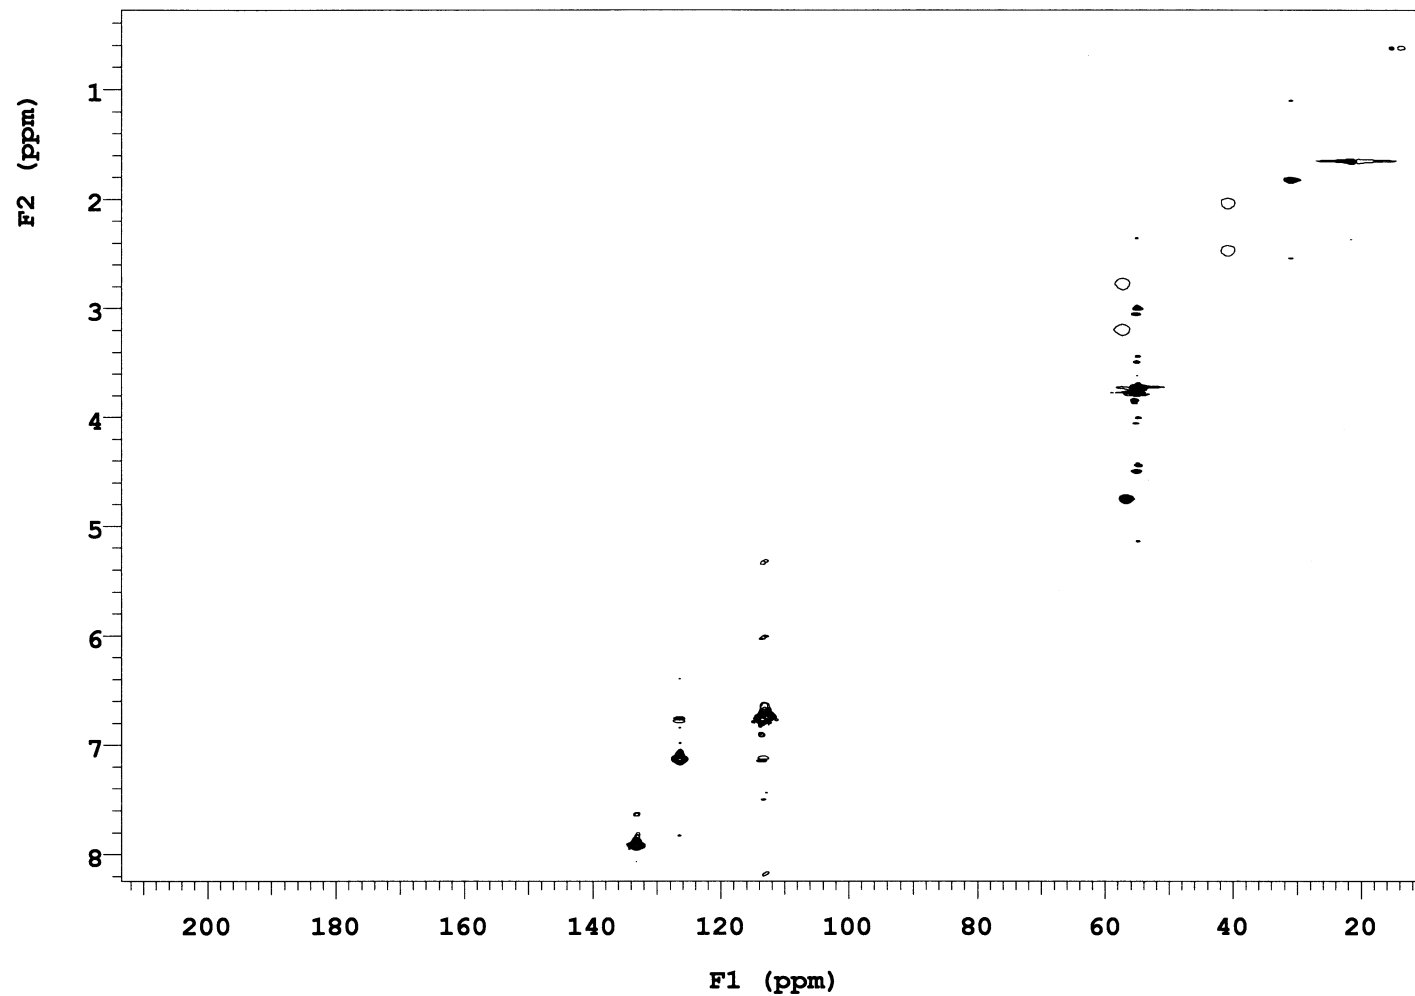

HSQC of compound 2ca

IRR-120-N

Sample Name IRR-120-N  
Date collected 2024-08-28Pulse sequence gCOSY  
Solvent cdcl3Temperature 25  
Spectrometer Agilent-NMR-inova500Study owner vnmr2  
Operator vnmr2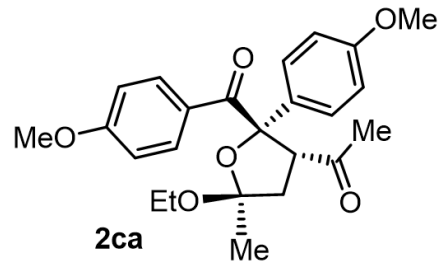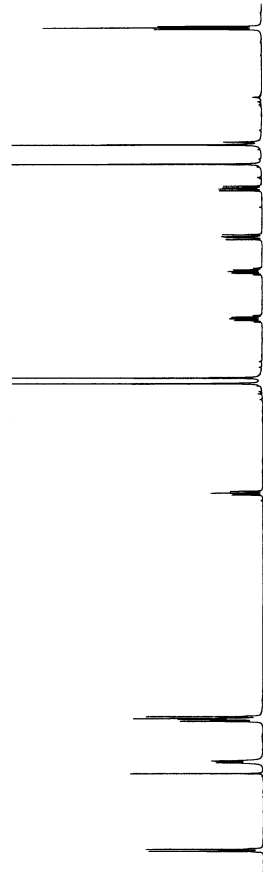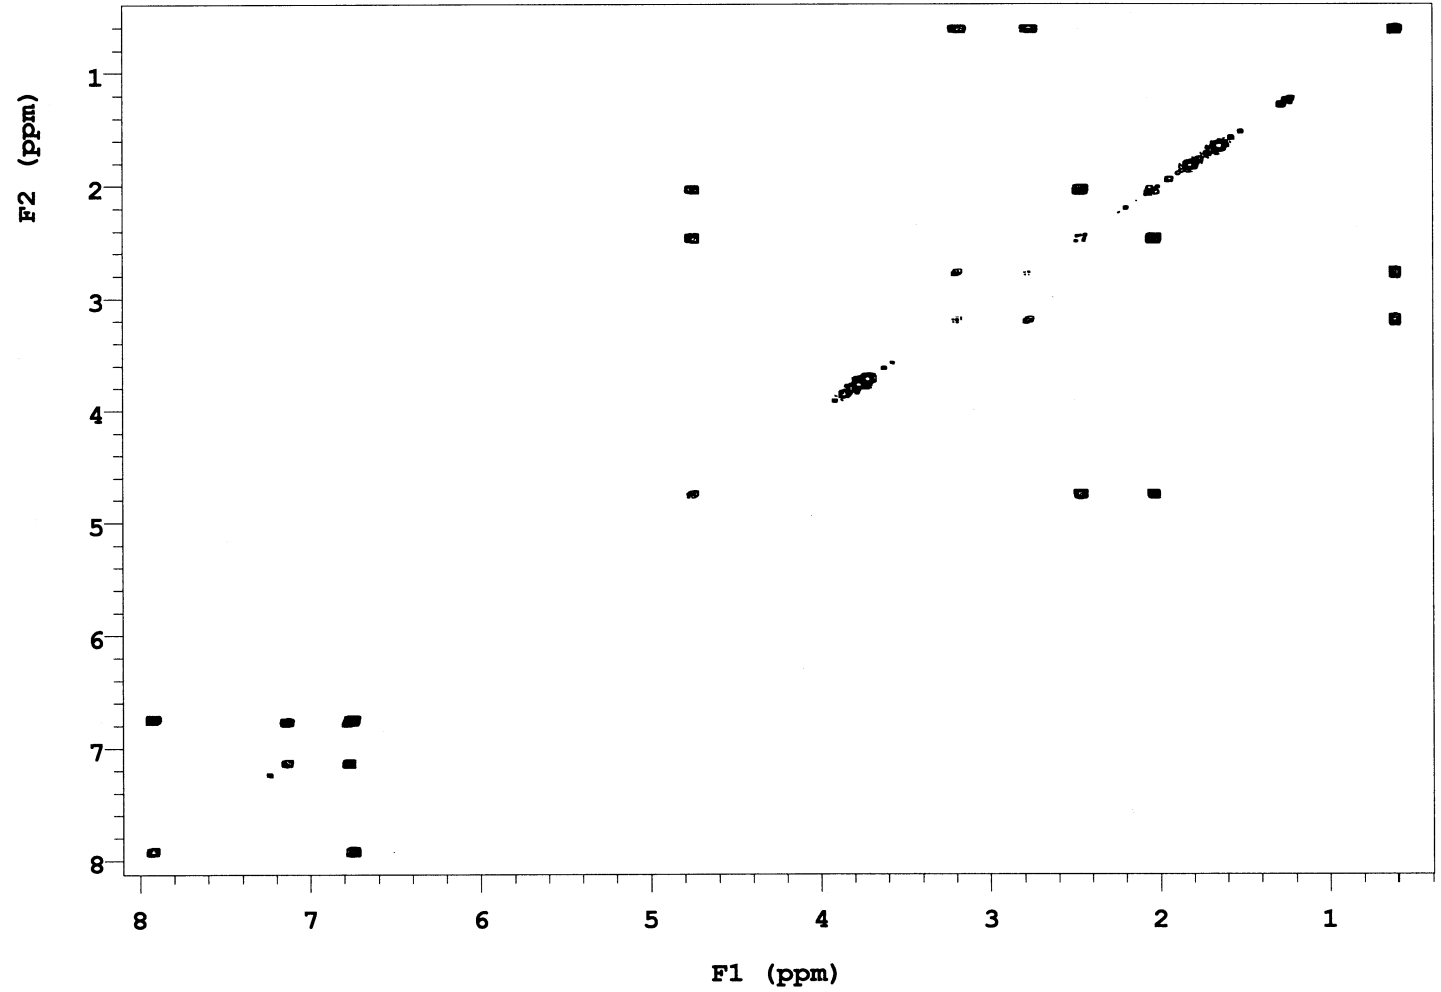

COSY of compound 2ca

IRR-120-N

Sample Name IRR-120-N  
Date collected 2024-08-28Pulse sequence NOESY  
Solvent cdcl3Temperature 25  
Spectrometer Agilent-NMR-inova500Study owner vnmr2  
Operator vnmr2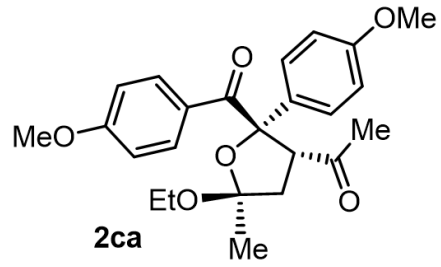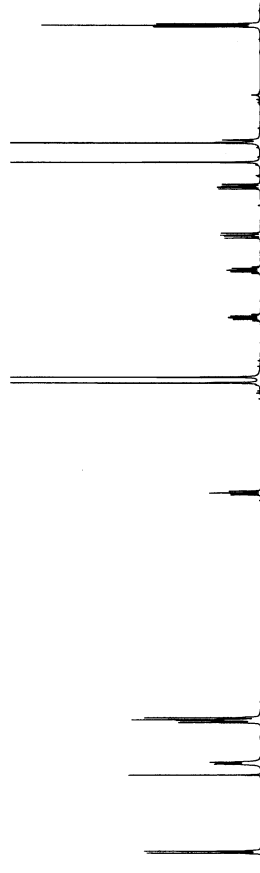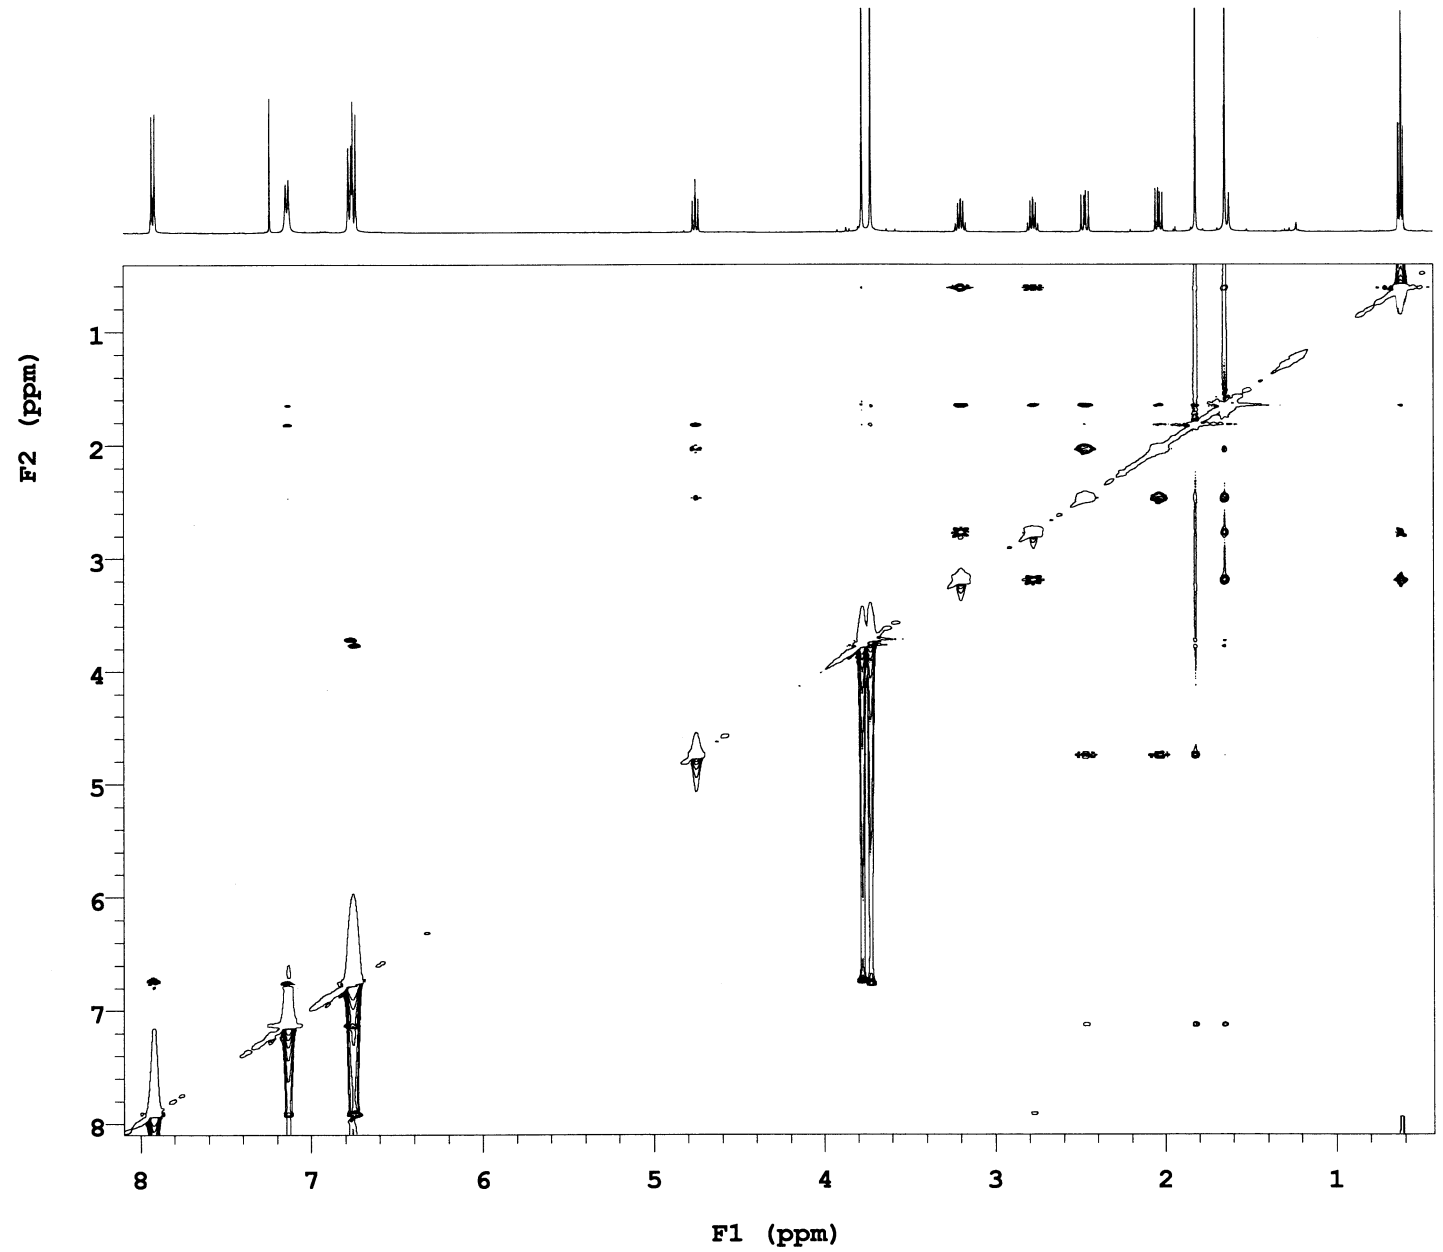

NOESY of compound 2ca

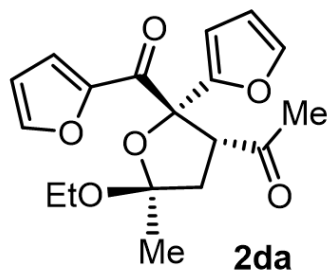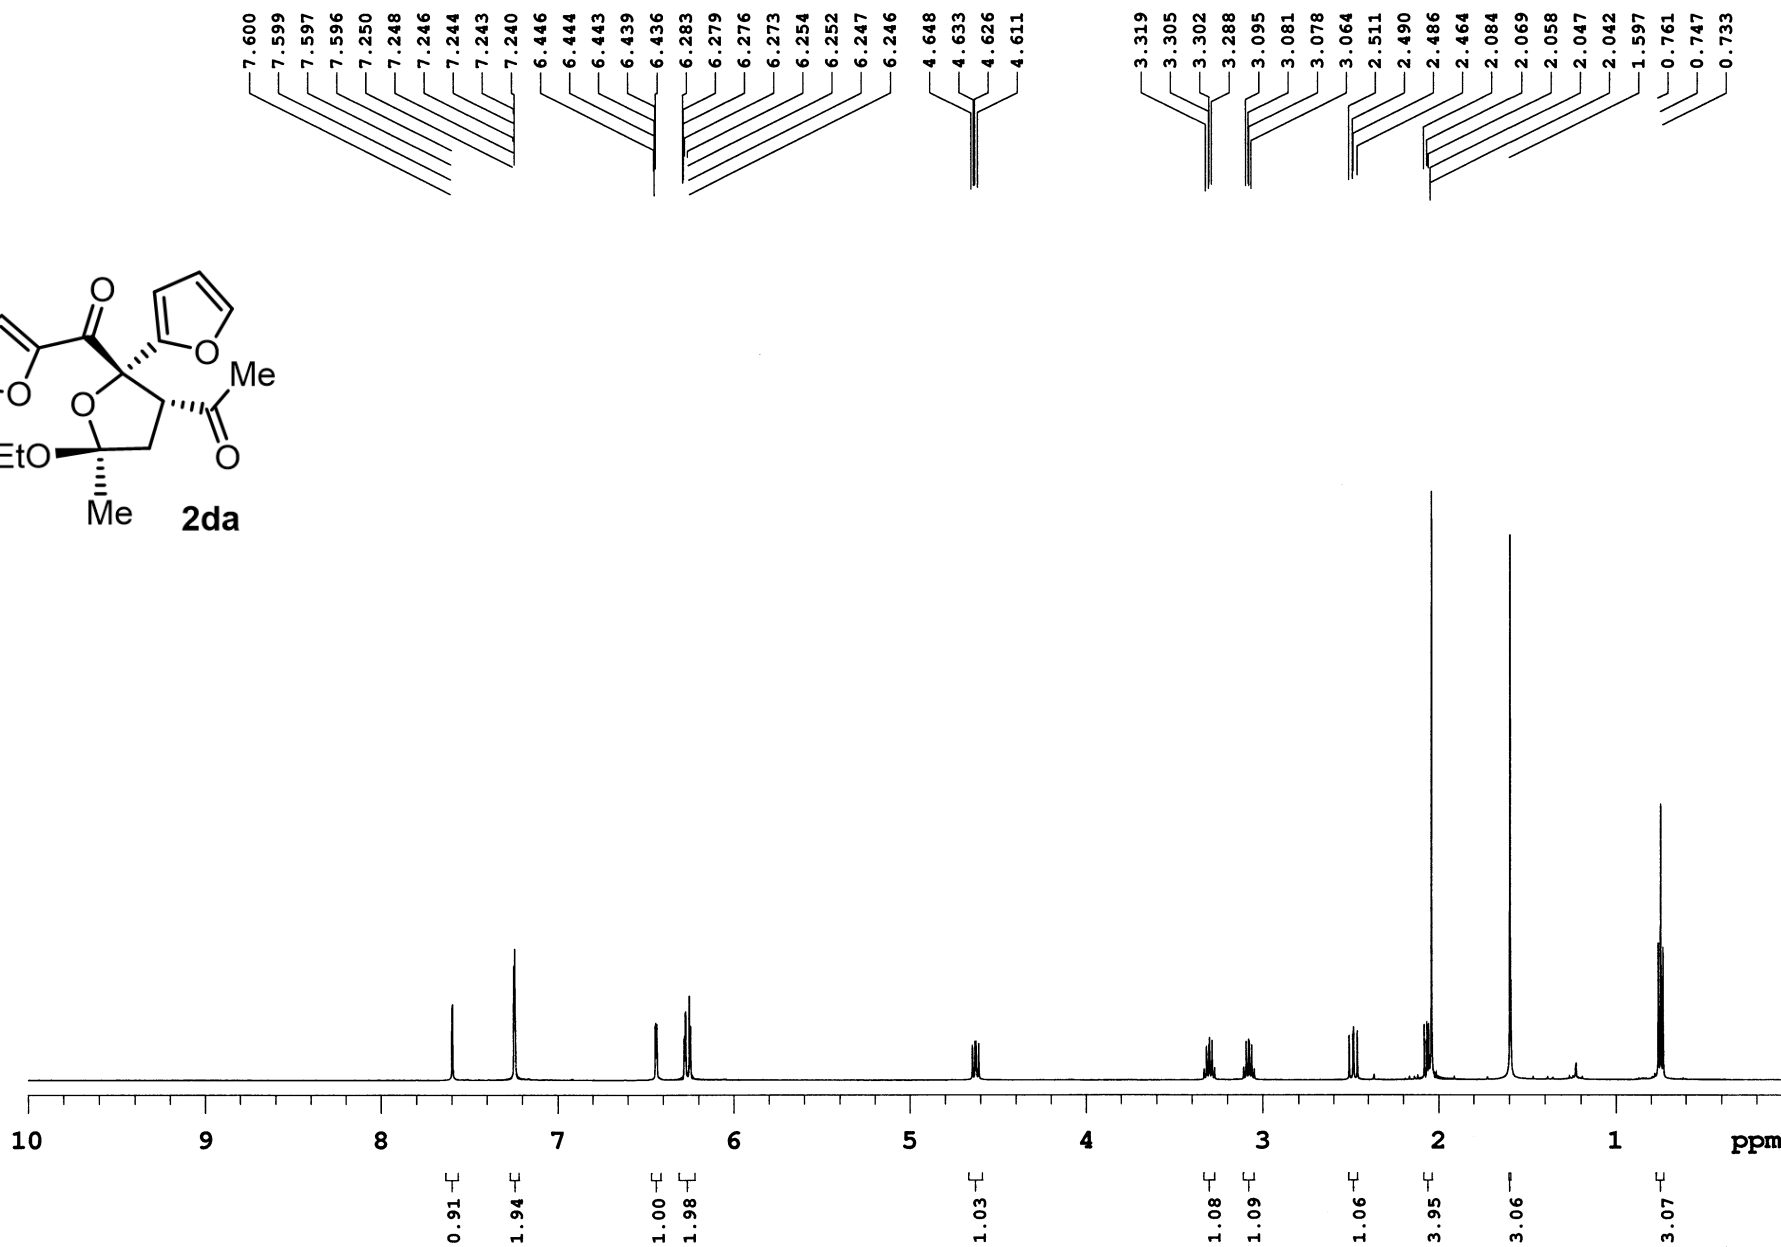

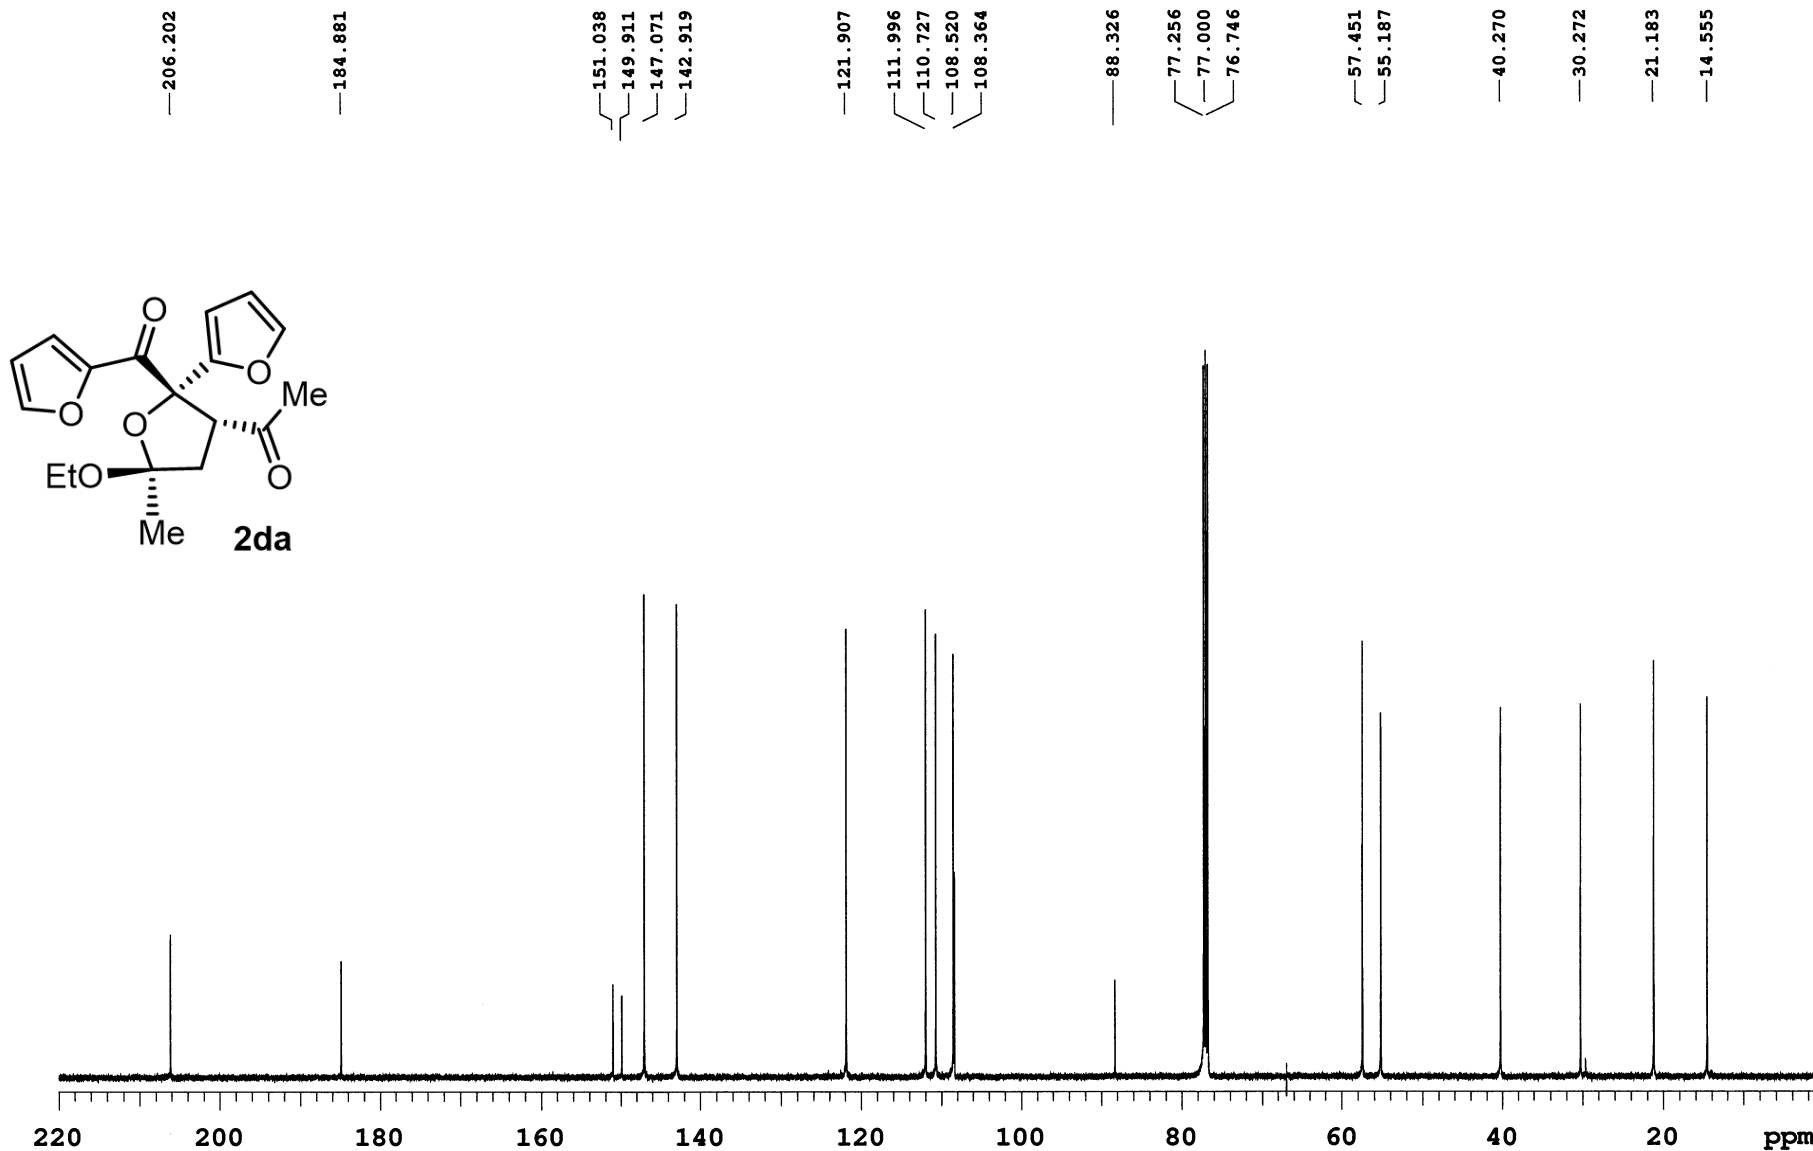

13C NMR (125 MHz, CDCl3) of compound 2da

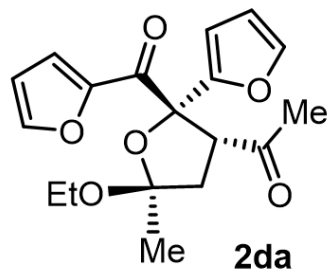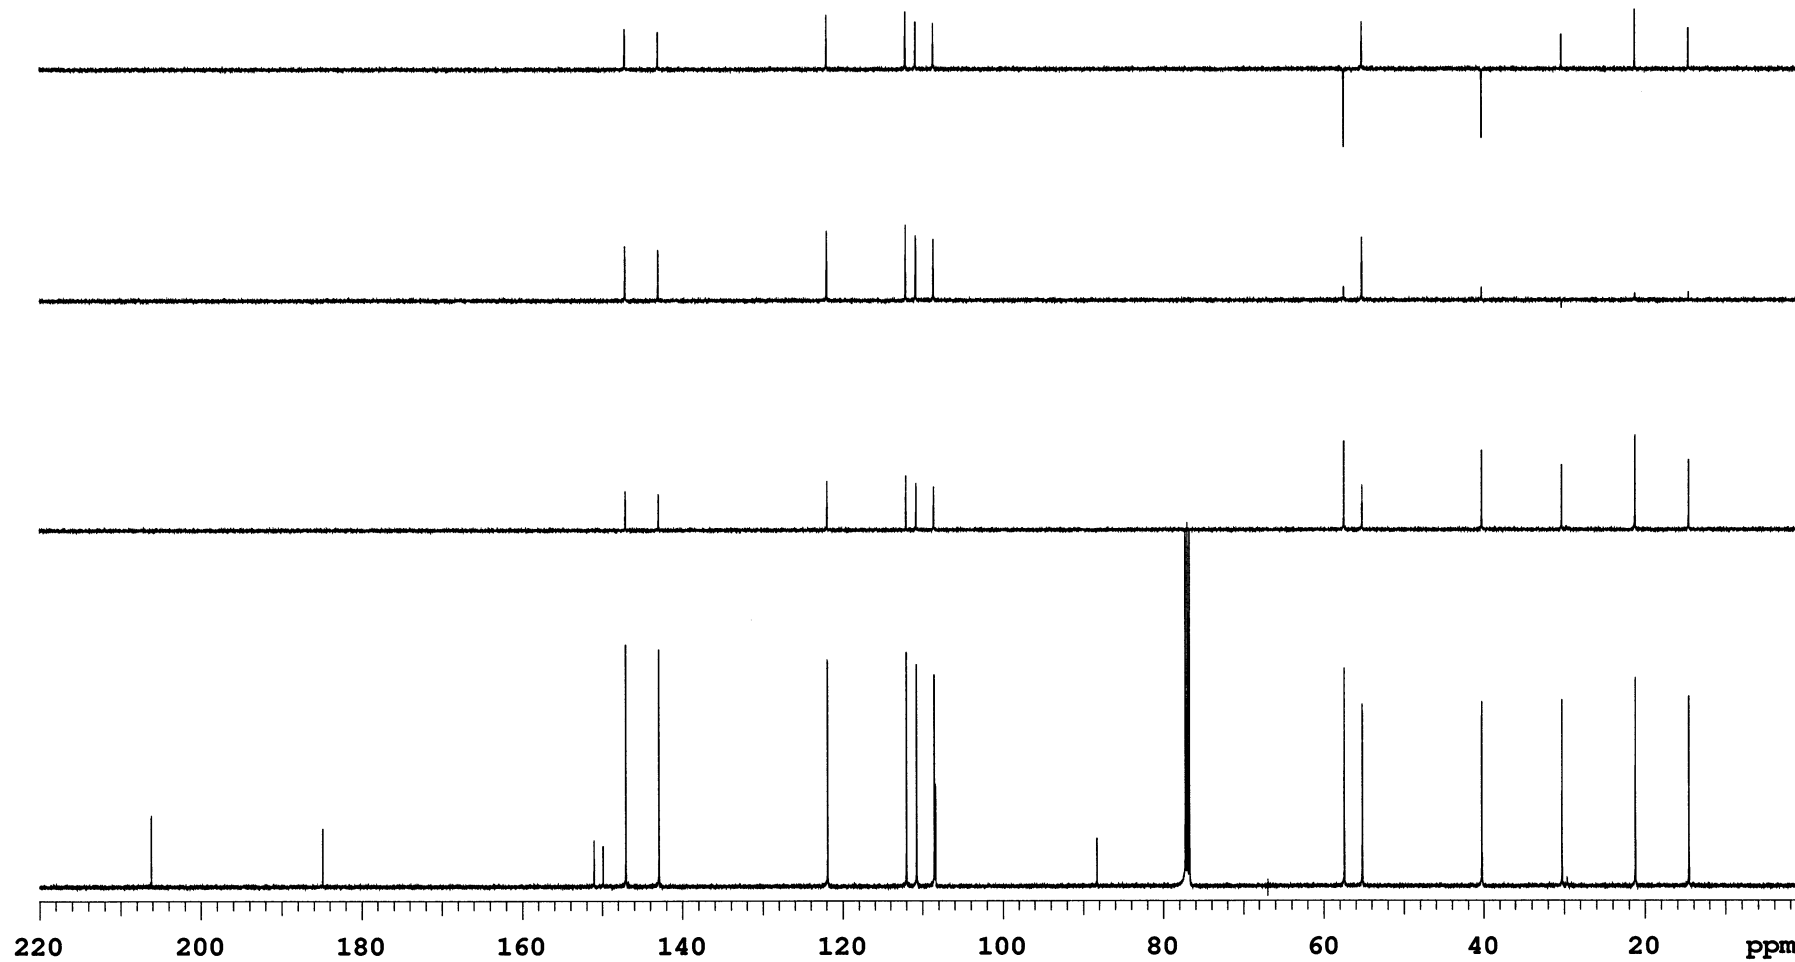

DEPT of compound 2da



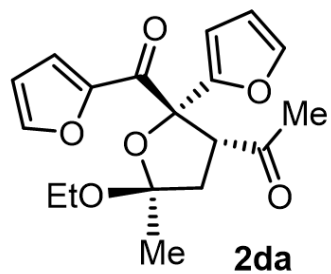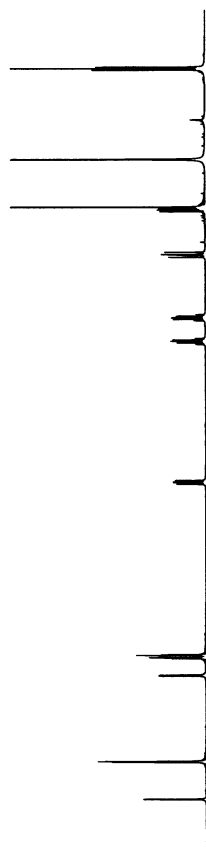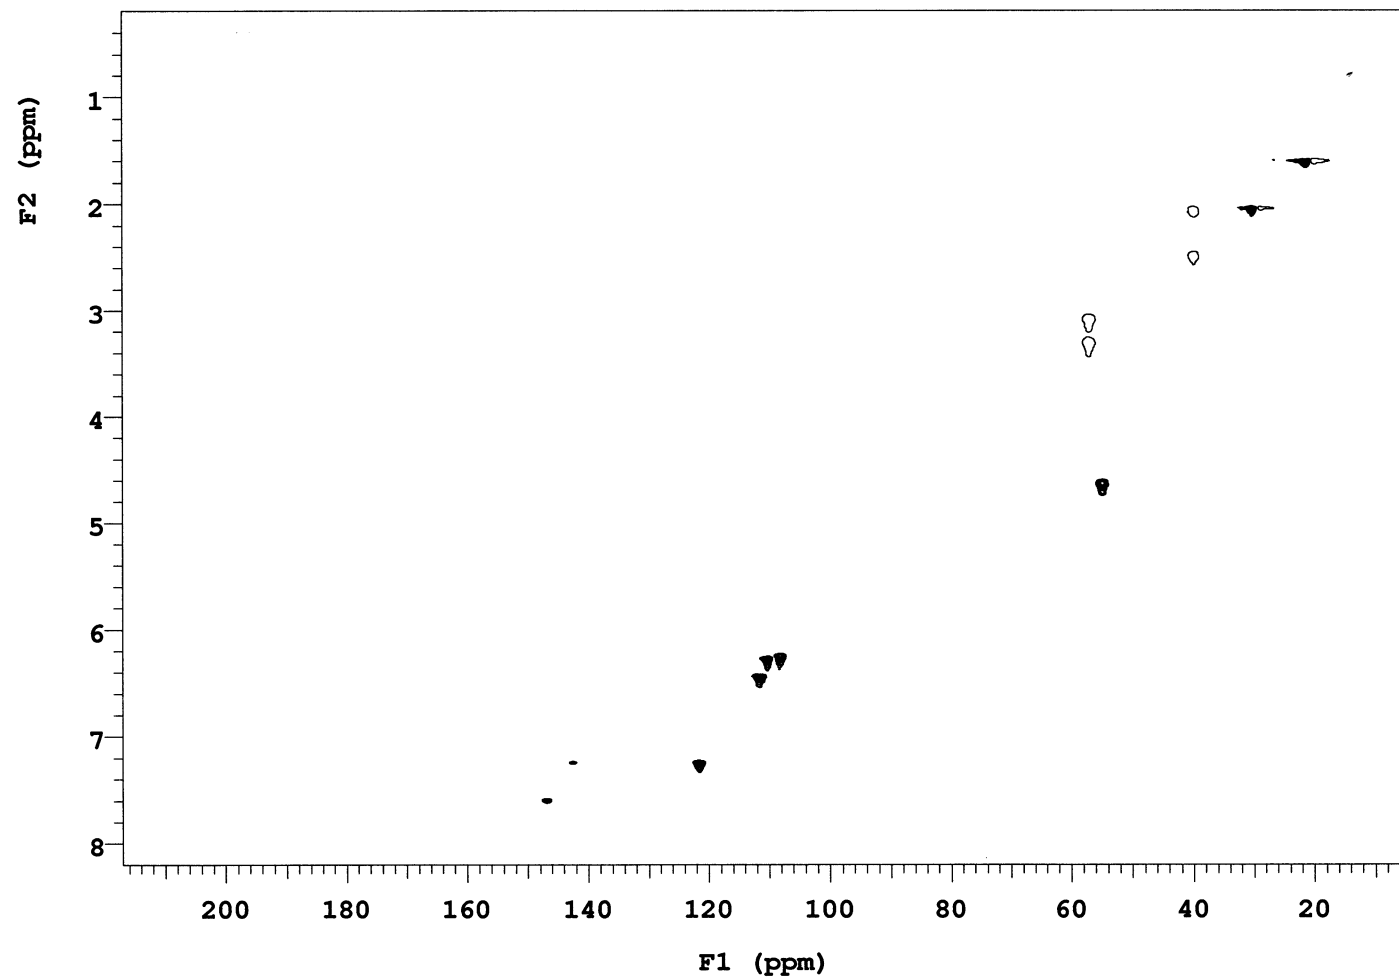

HSQC of compound 2da

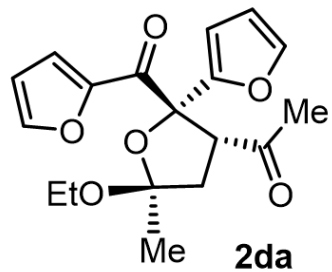

2da

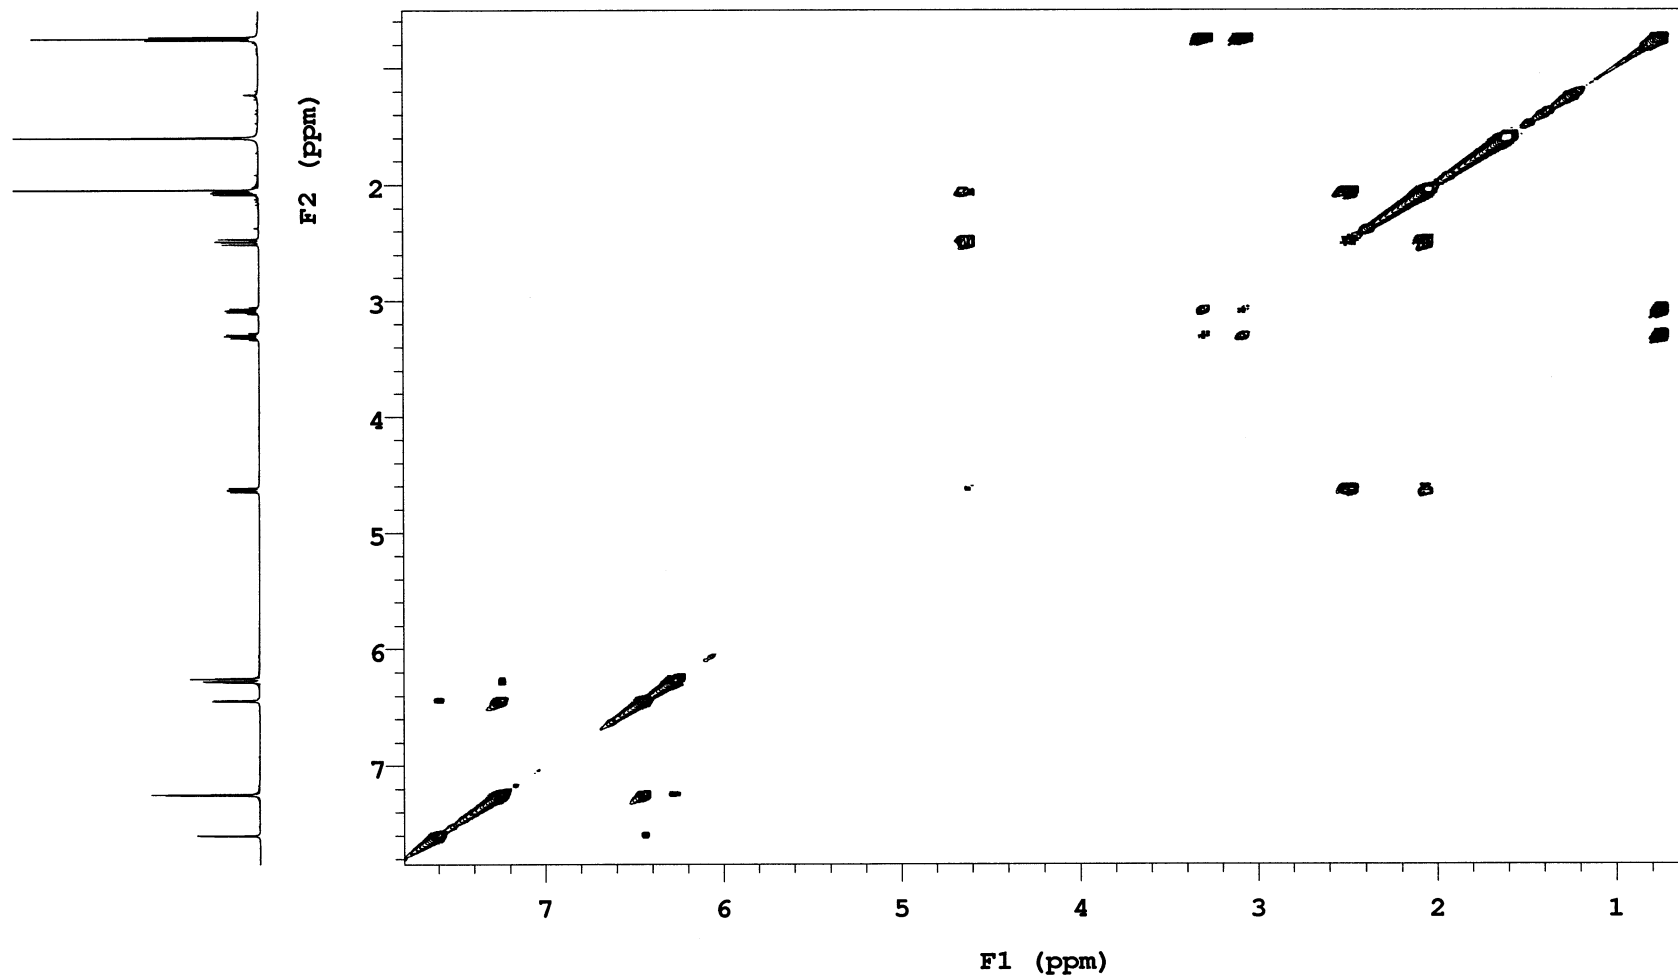

COSY of compound 2da

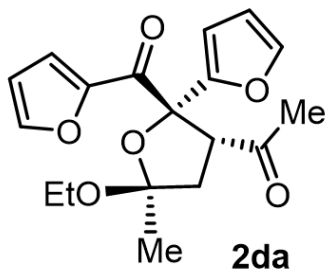

2da

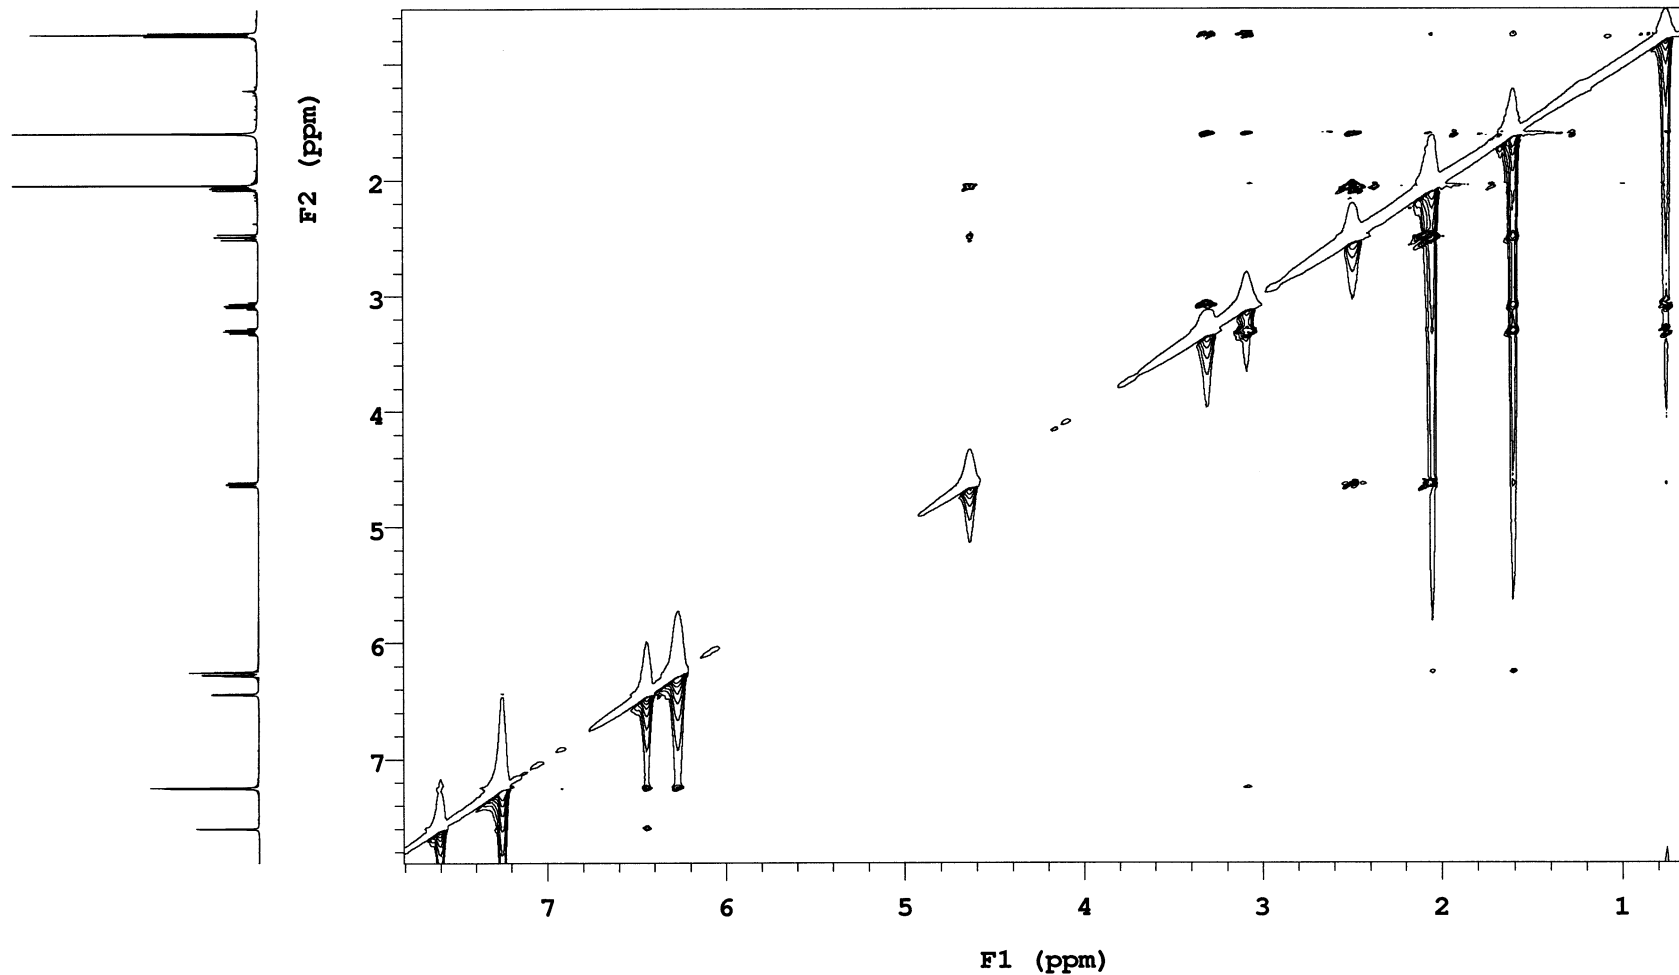

NOESY of compound 2da

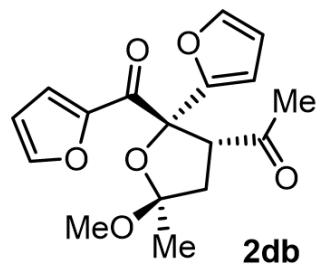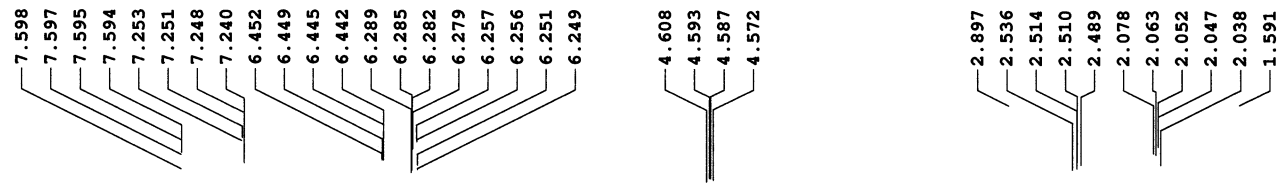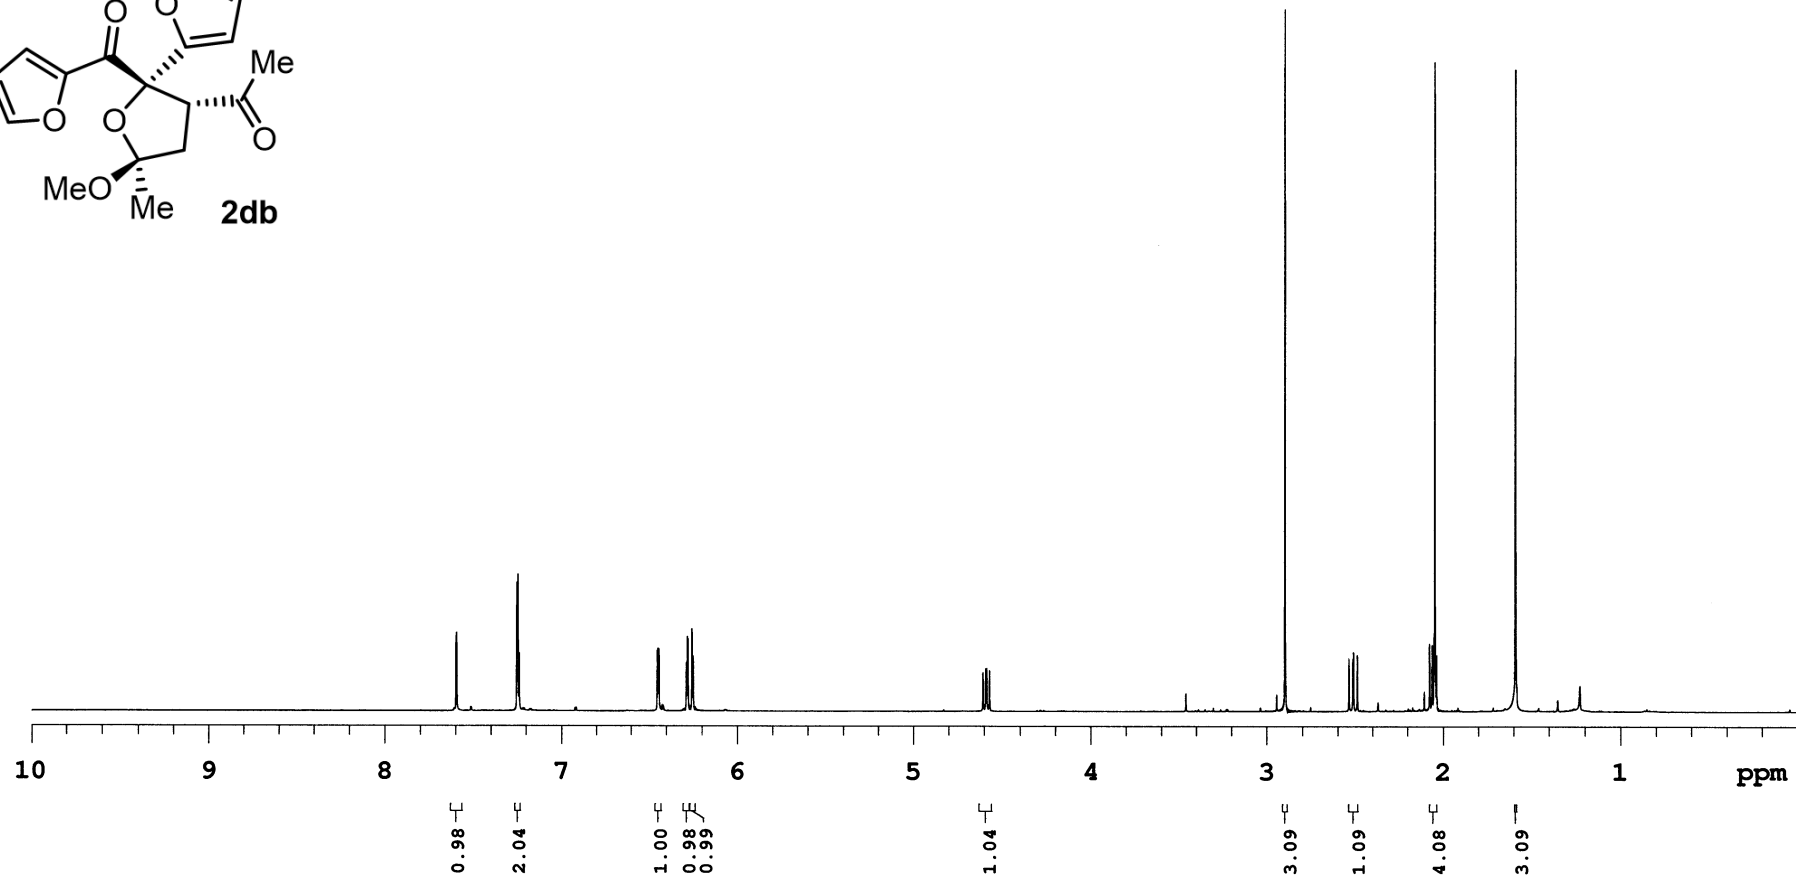

Sample Name **IRR-02-229**  
Date collected **2024-02-27**

Pulse sequence **CARBON**  
Solvent **cdcl3**

Temperature **25**  
Spectrometer **Agilent-NMR-inova500**

Study owner **vnmr2**  
Operator **vnmr2**

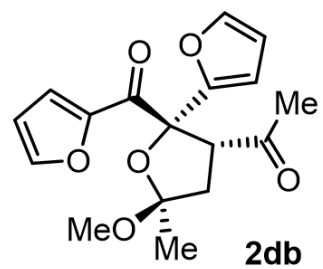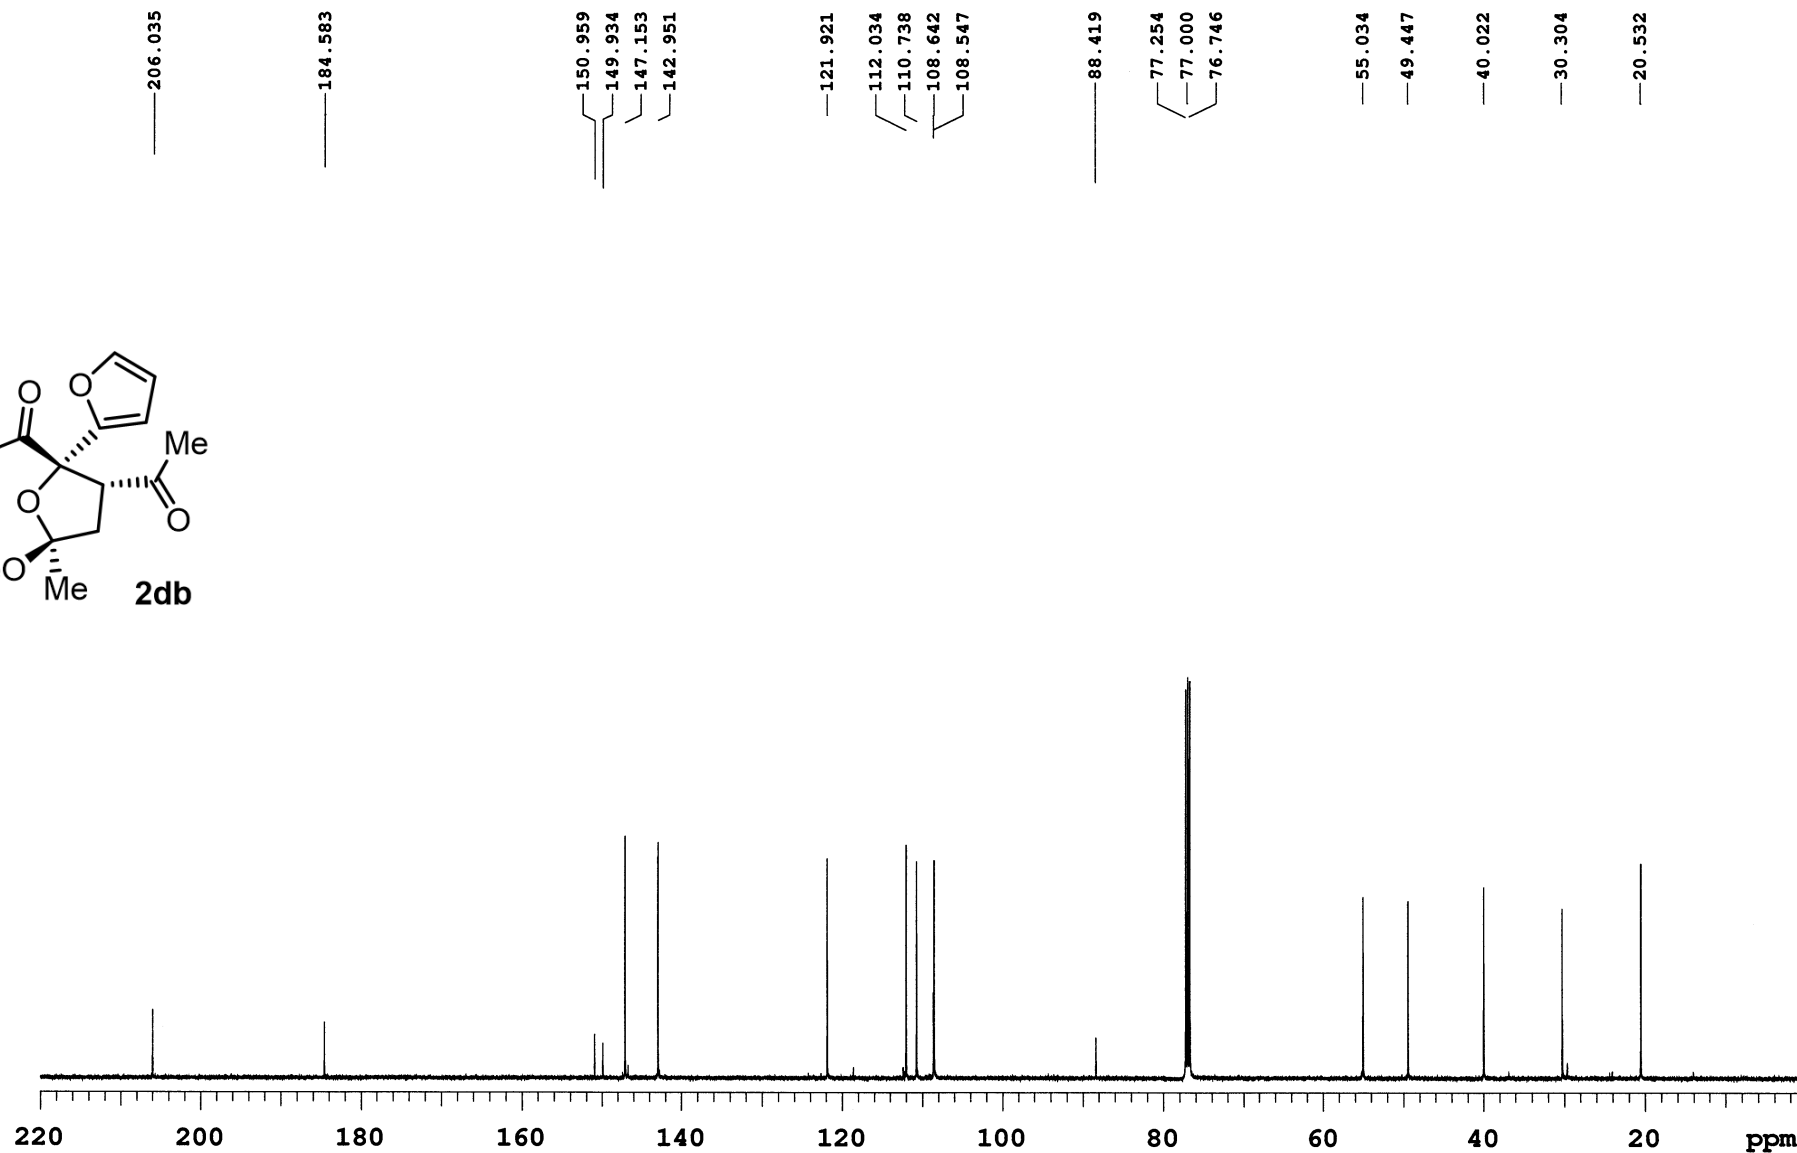

$^{13}\text{C}$  NMR (125 MHz,  $\text{CDCl}_3$ ) of compound 2db

Sample Name **IRR-02-229**  
Date collected **2024-02-28**

Pulse sequence **DEPT**  
Solvent **cdcl3**

Temperature **25**  
Spectrometer **Agilent-NMR-inova500**

Study owner **vnmr2**  
Operator **vnmr2**

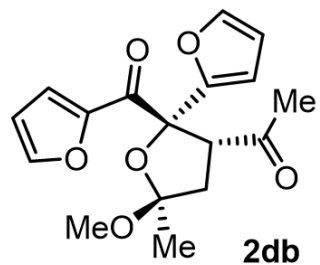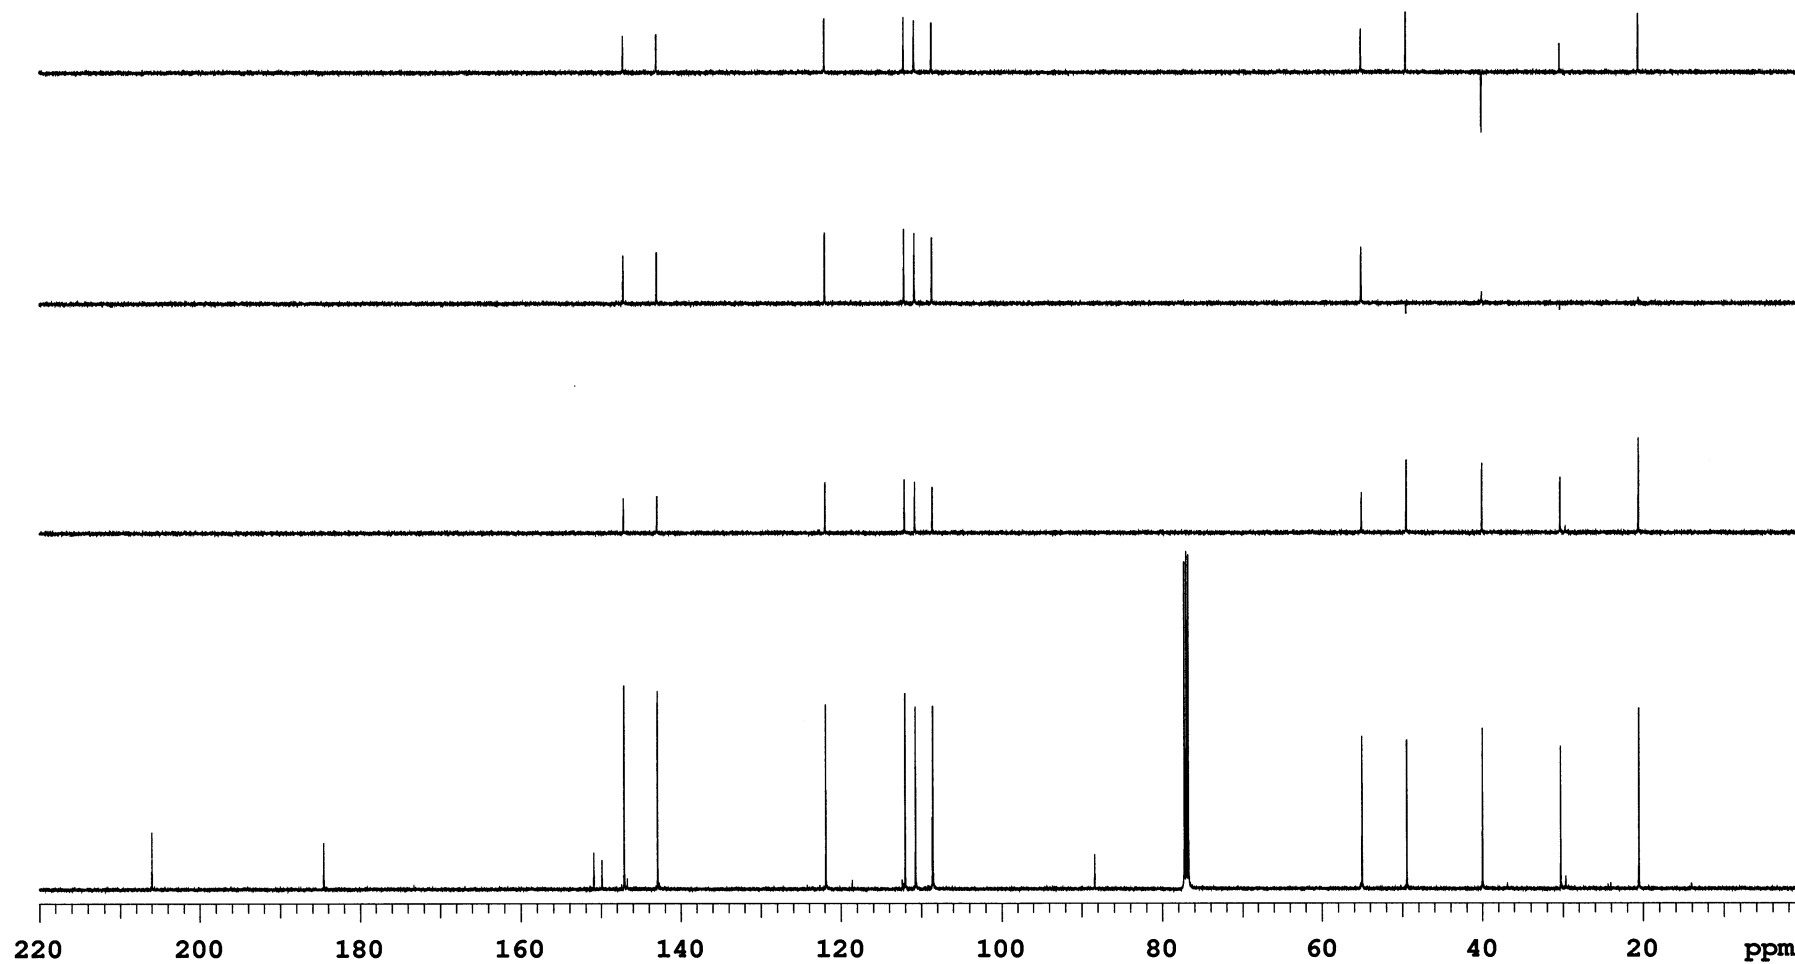

DEPT of compound 2db

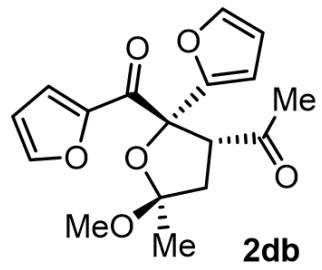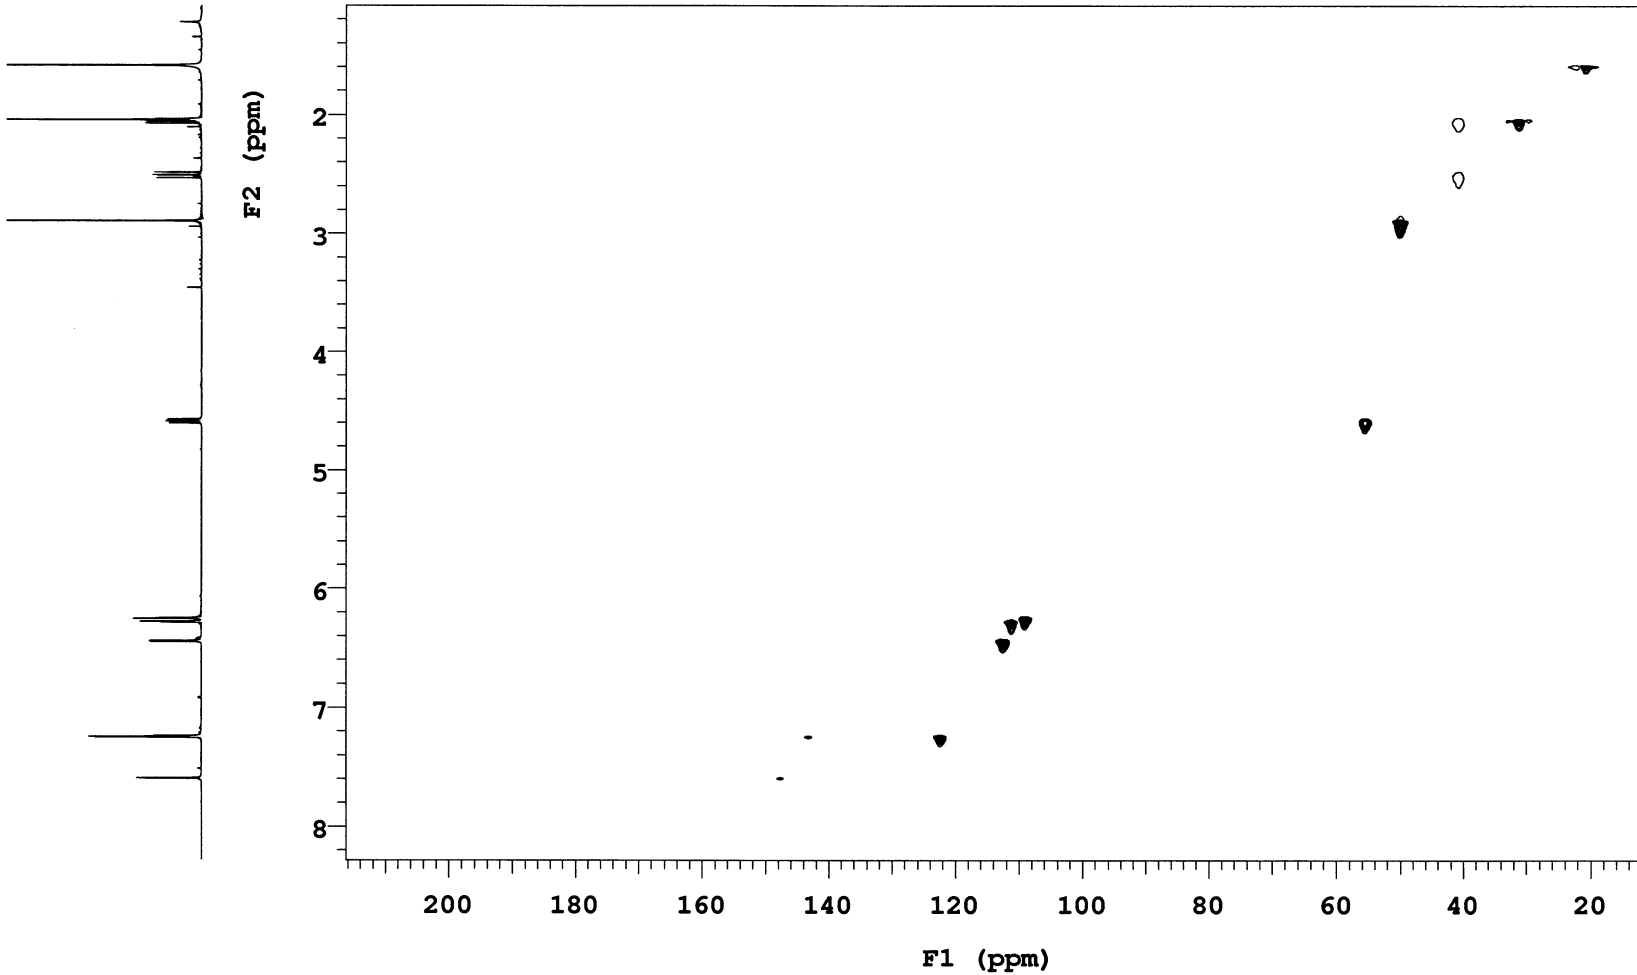

HSQC of compound 2db

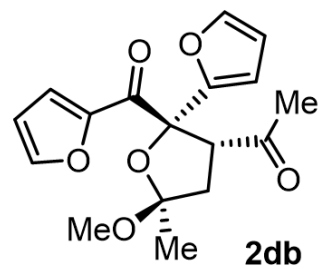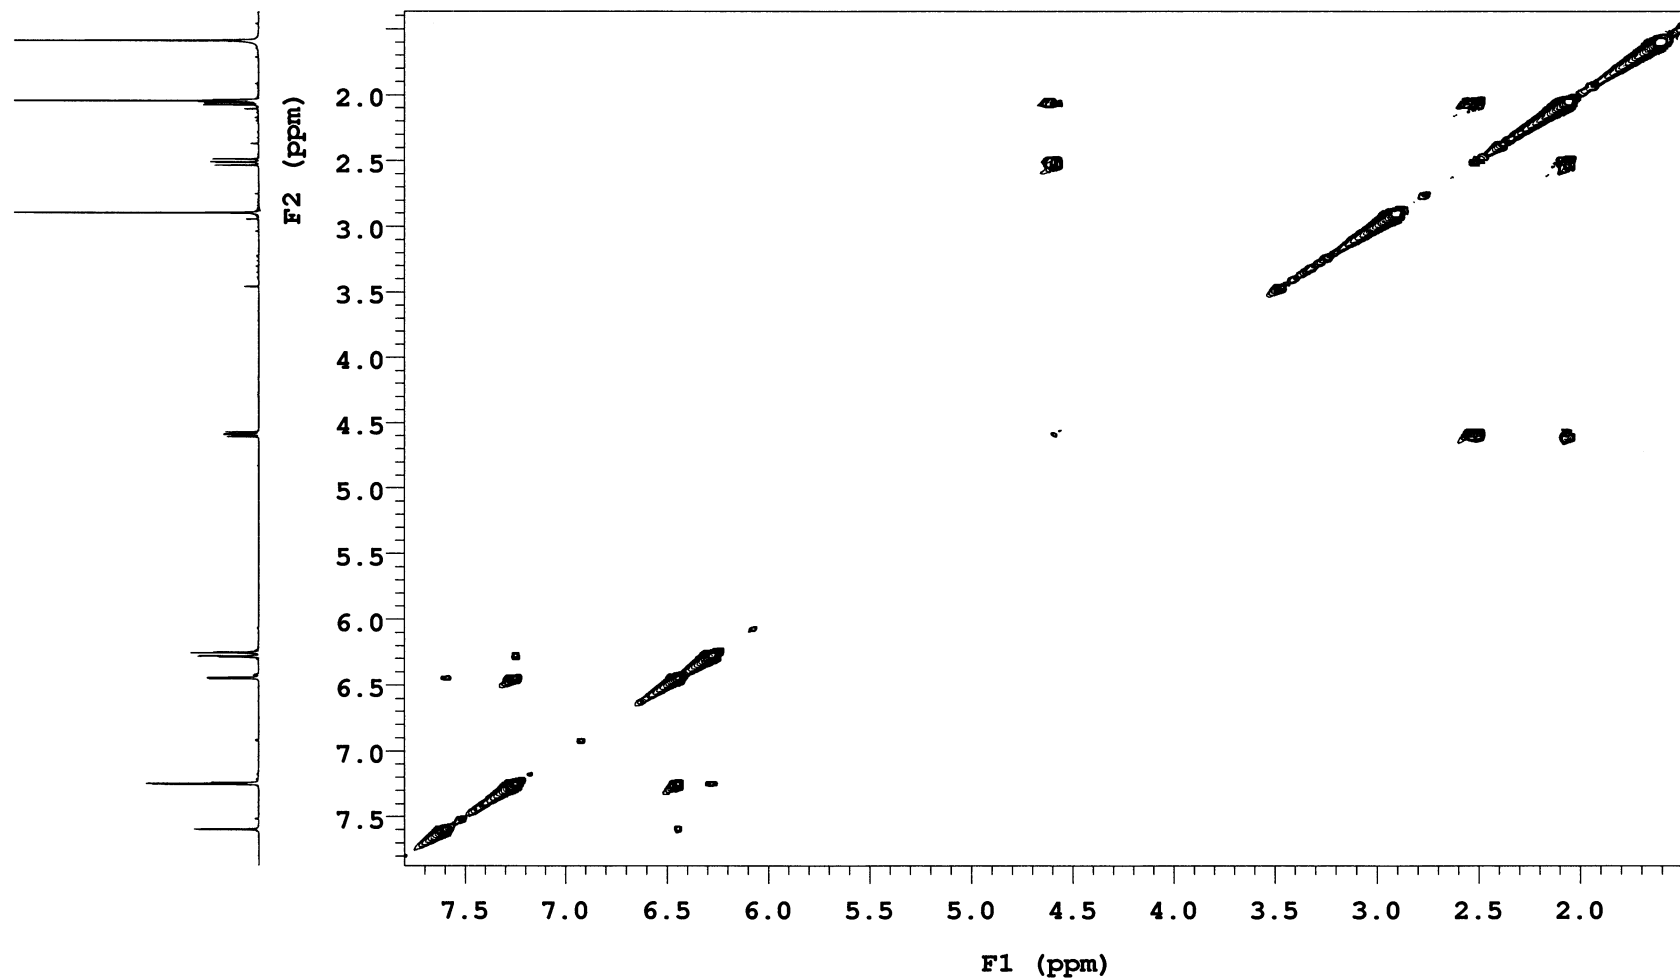

COSY of compound 2db



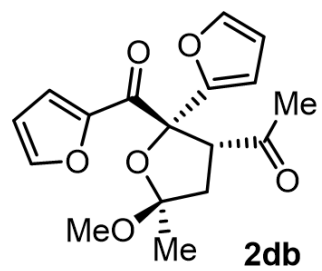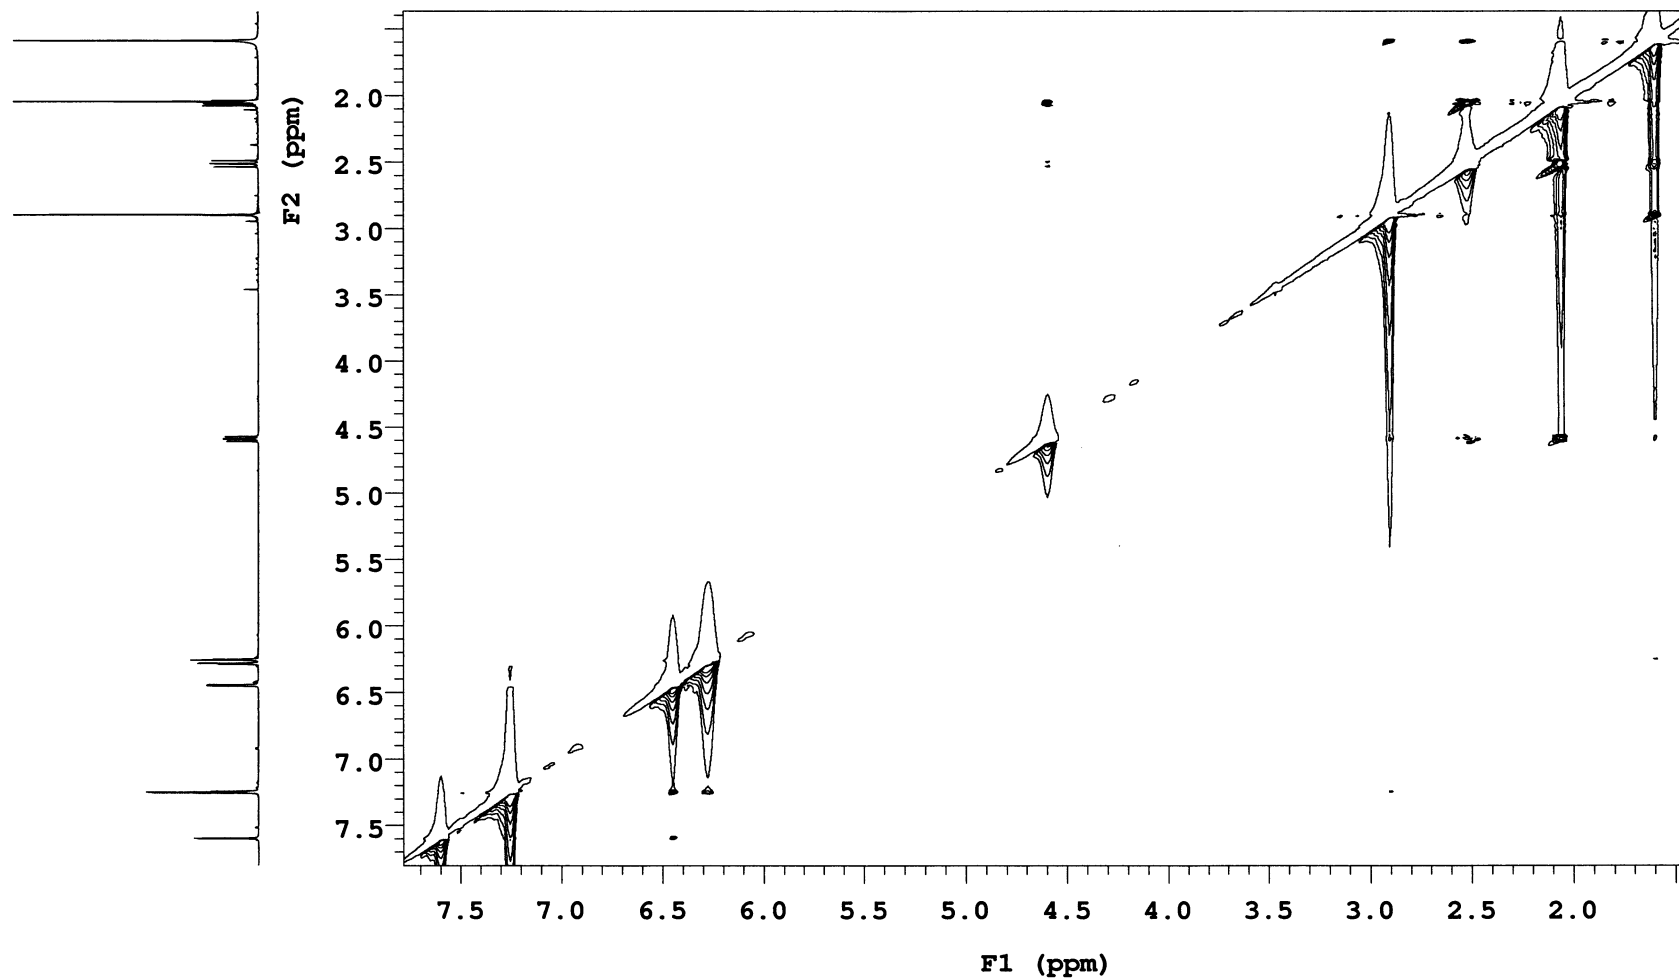

NOESY of compound 2db

Sample Name **IRR-03-008**  
Date collected **2024-02-26**Pulse sequence **PROTON**  
Solvent **cdcl3**Temperature **25**  
Spectrometer **Agilent-NMR-inova500**Study owner **vnmr2**  
Operator **vnmr2**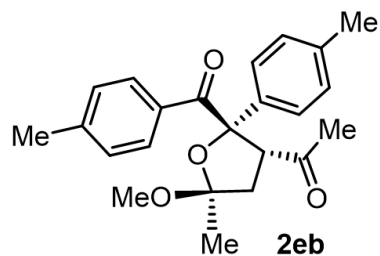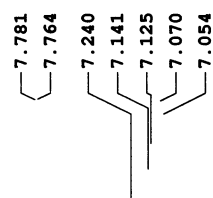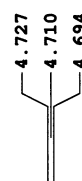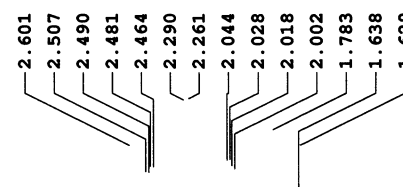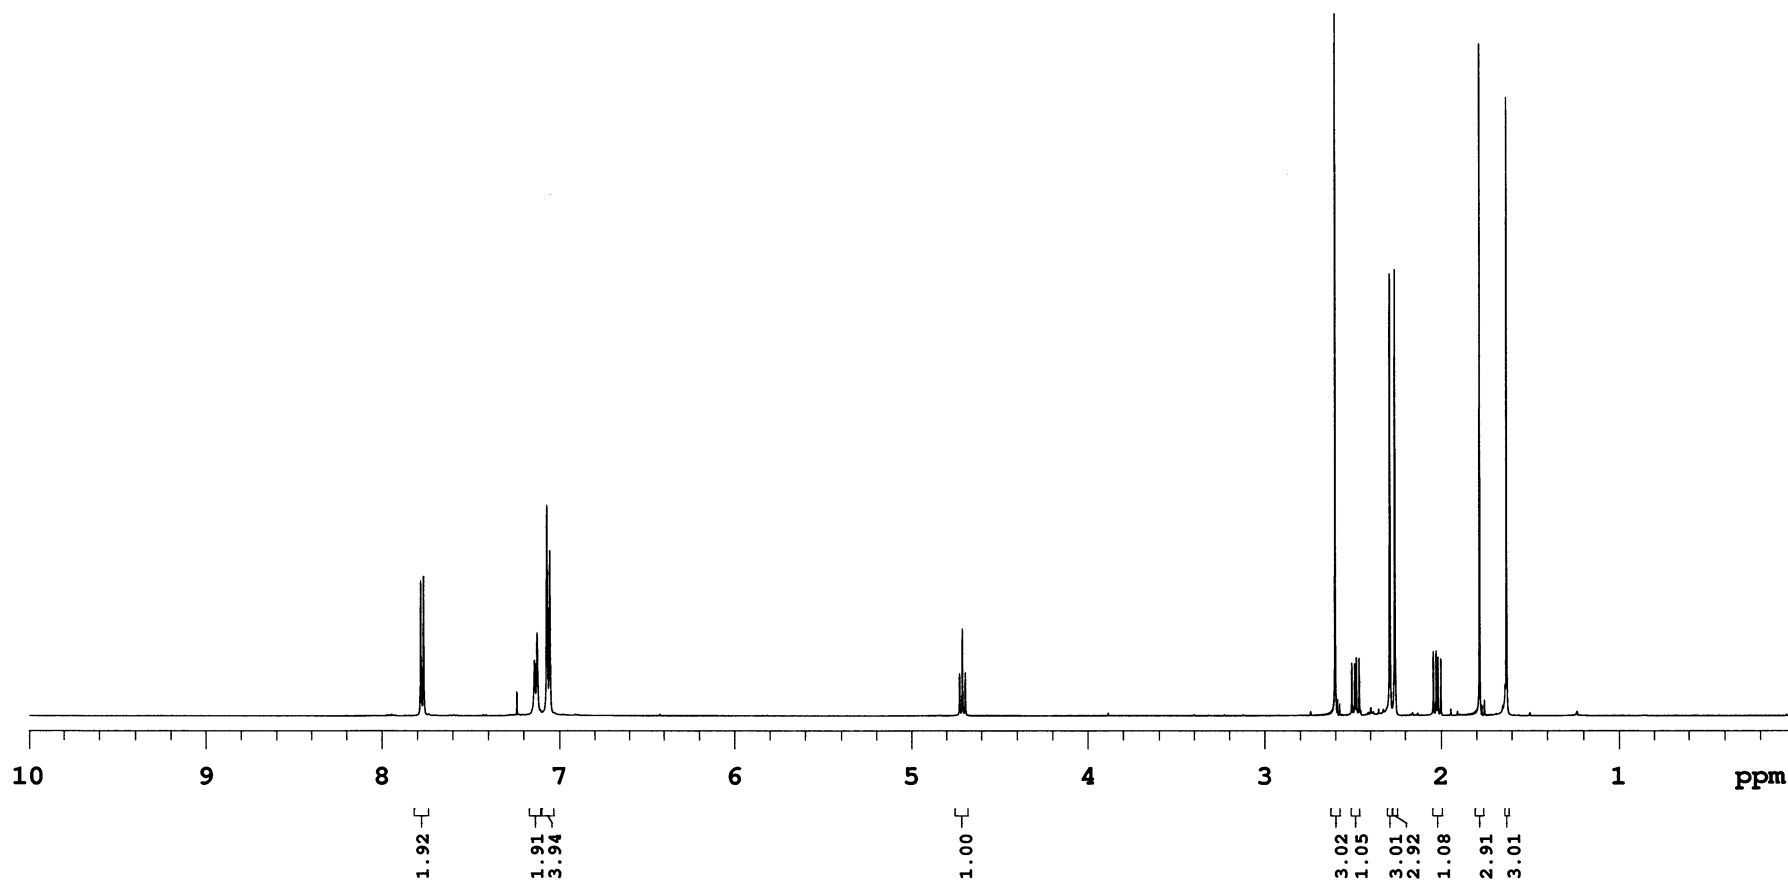

Sample Name **IRF-03-008**  
Date collected **2024-02-26**Pulse sequence **CARBON**  
Solvent **cdcl3**Temperature **25**  
Spectrometer **Agilent-NMR-inova500**Study owner **vnmr2**  
Operator **vnmr2**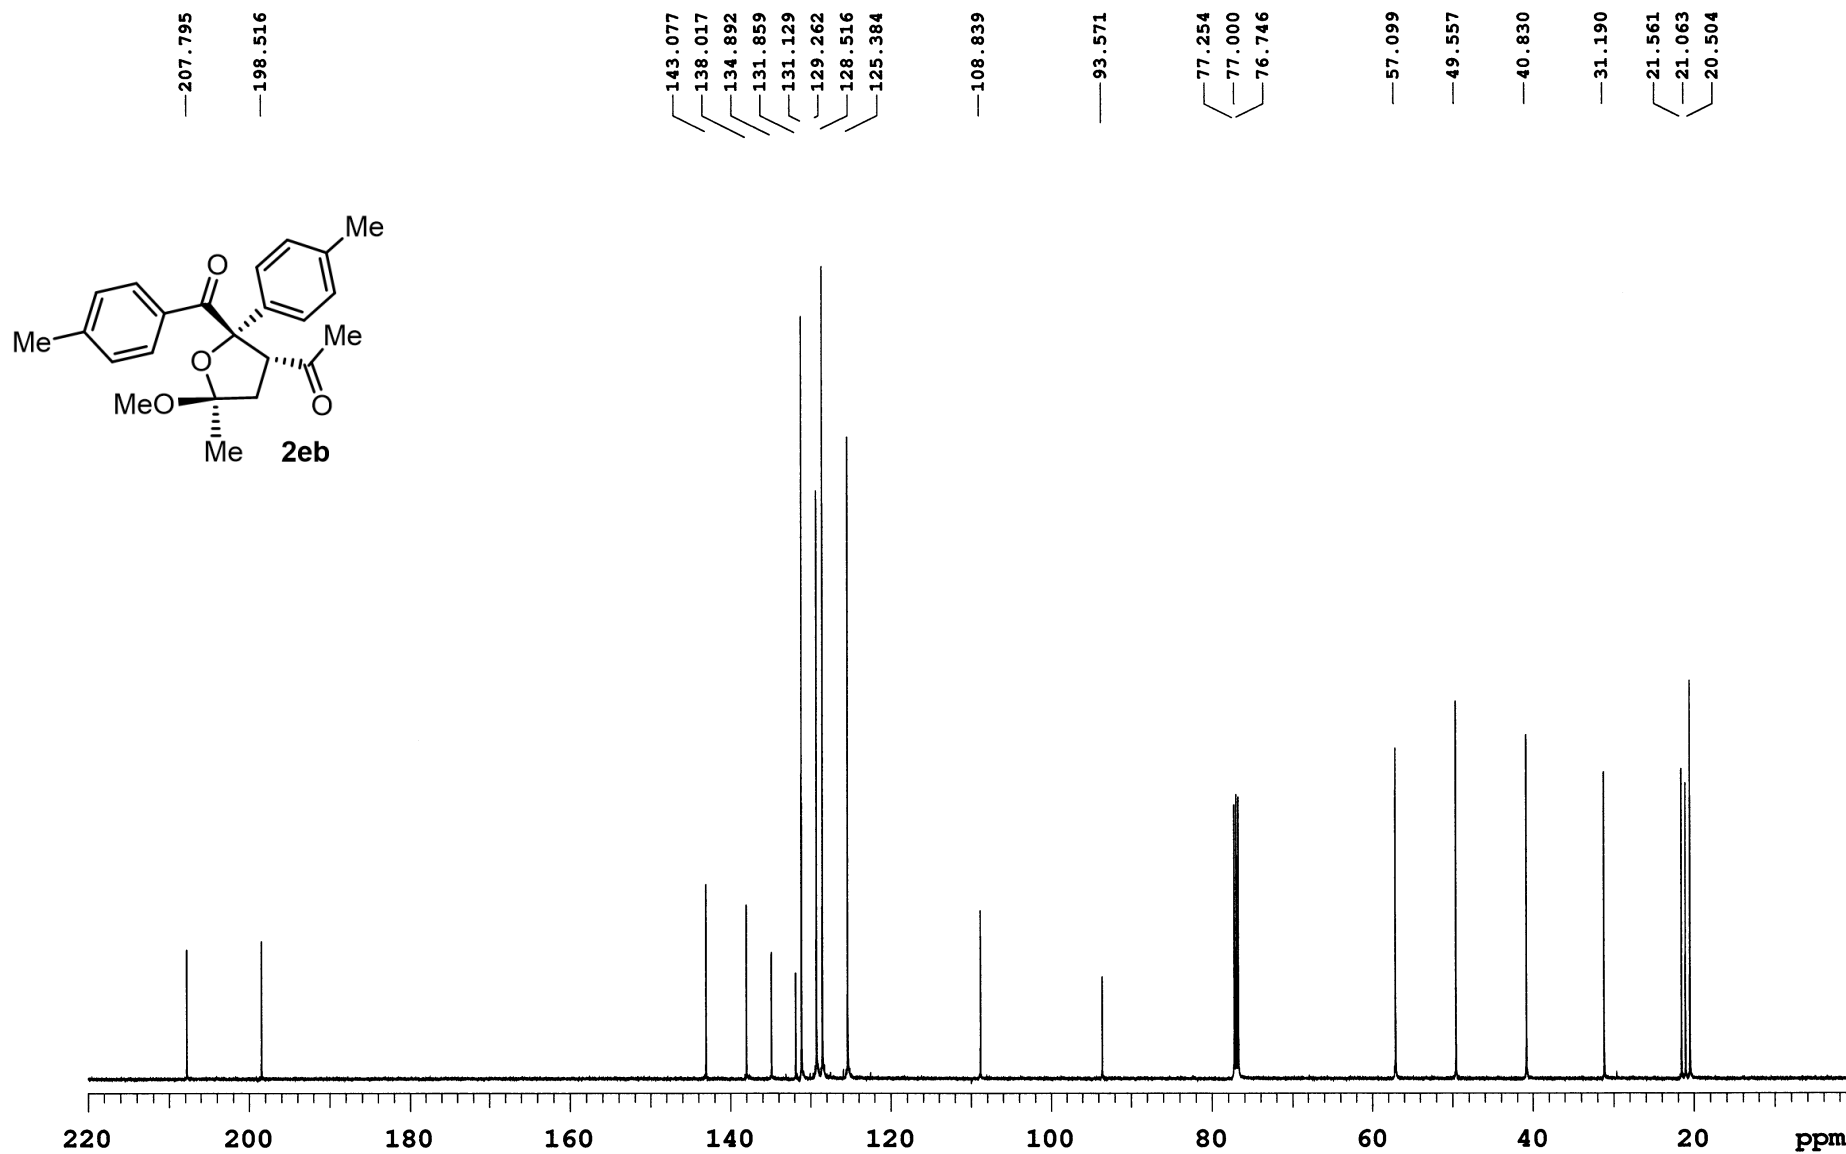

13C NMR (125 MHz, CDCl3) of compound 2eb

Sample Name **IRR-03-008**  
Date collected **2024-02-27**

Pulse sequence **DEPT**  
Solvent **cdcl3**

Temperature **25**  
Spectrometer **Agilent-NMR-inova500**

Study owner **vnmr2**  
Operator **vnmr2**

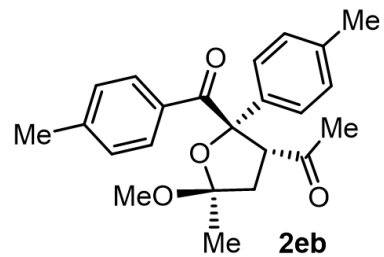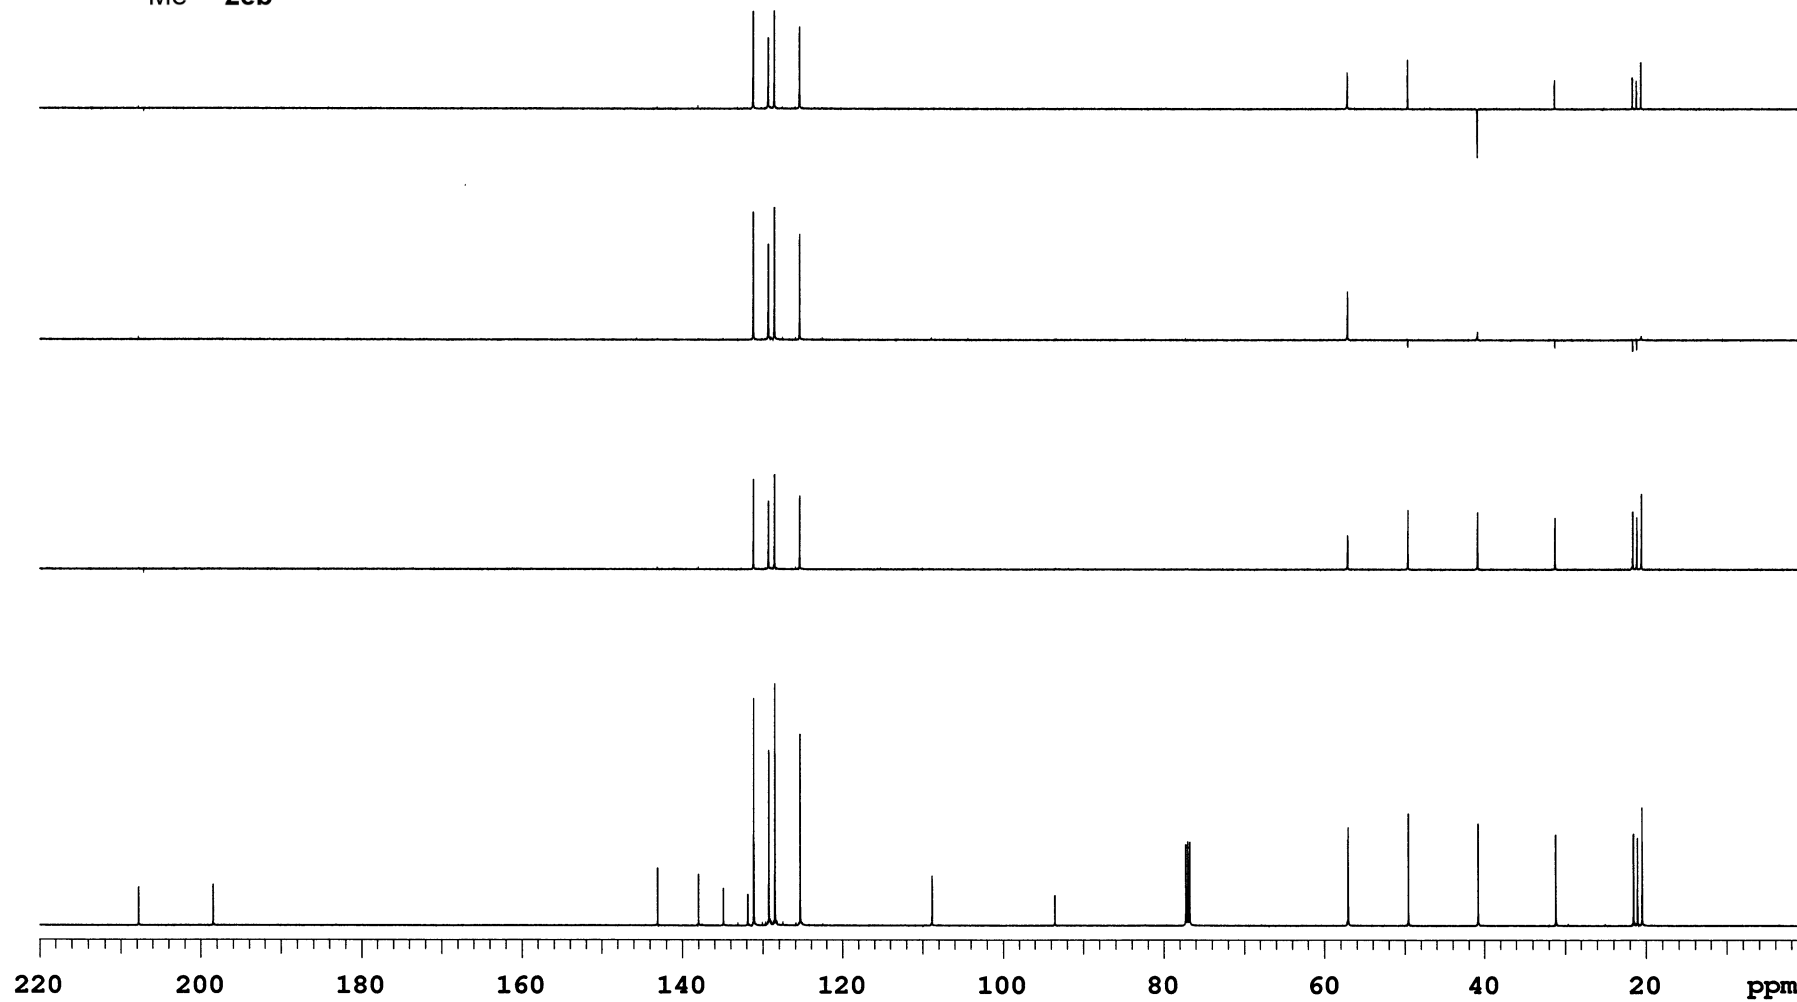

DEPT of compound 2eb

Sample Name **IRR-03-008**  
Date collected **2024-02-27**

Pulse sequence **gHSQC**  
Solvent **cdcl3**

Temperature **25**  
Spectrometer **Agilent-NMR-inova500**

Study owner **vnmr2**  
Operator **vnmr2**

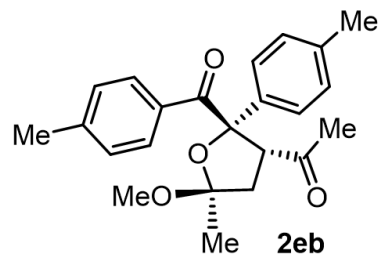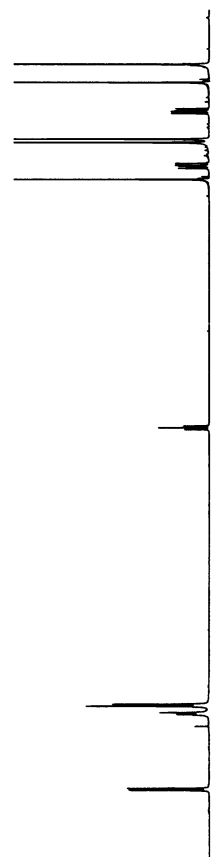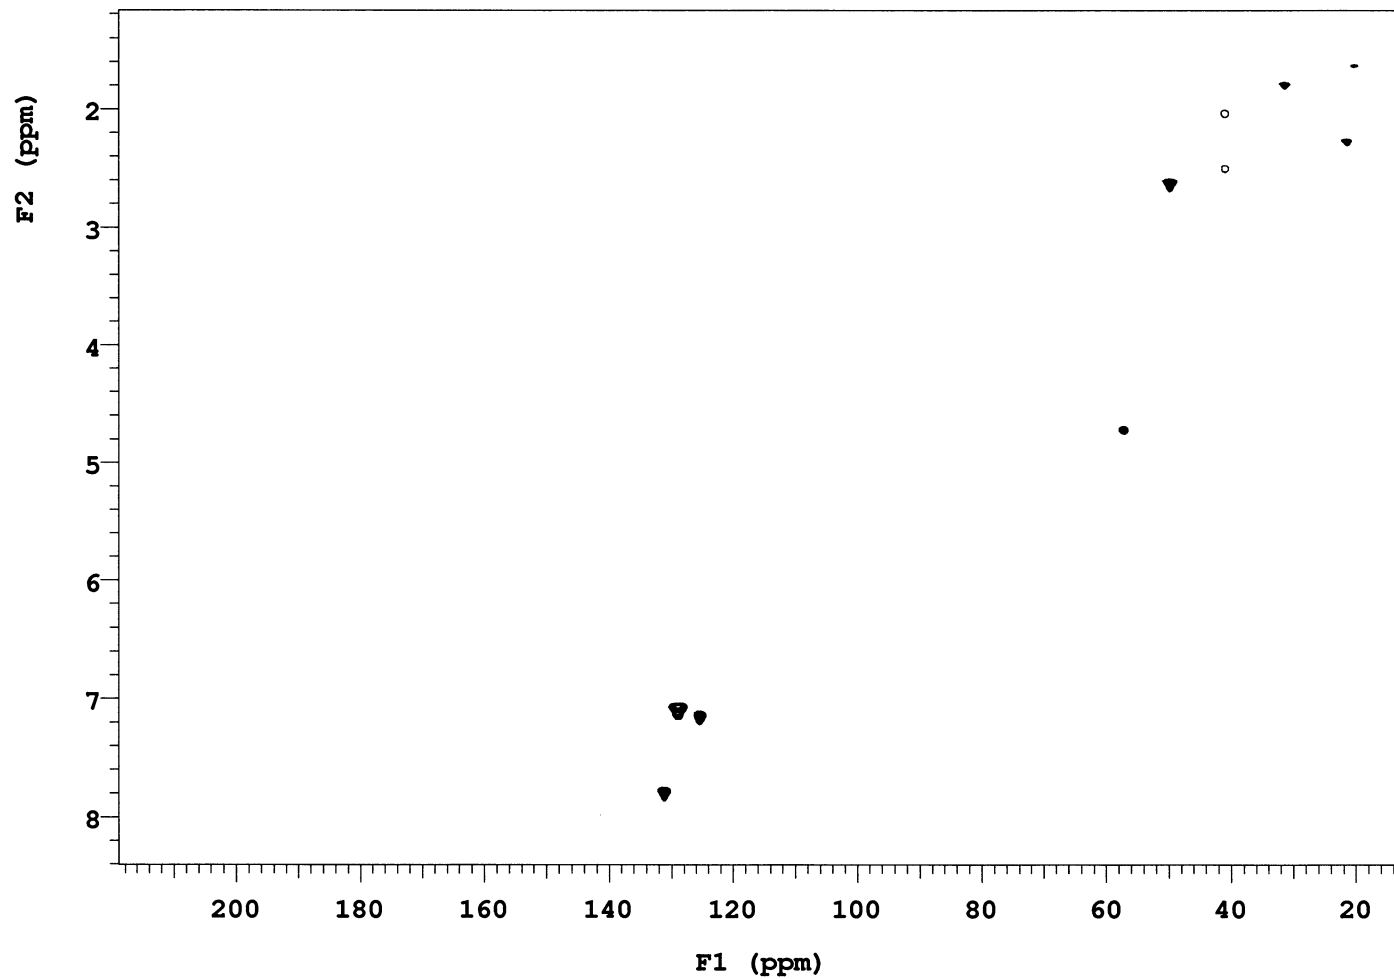

HSQC of compound 2eb

Sample Name **IRR-03-008**  
Date collected **2024-02-27**

Pulse sequence **gCOSY**  
Solvent **cdcl3**

Temperature **25**  
Spectrometer **Agilent-NMR-inova500**

Study owner **vnmr2**  
Operator **vnmr2**

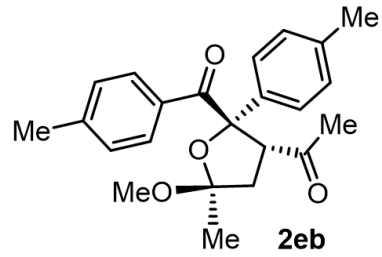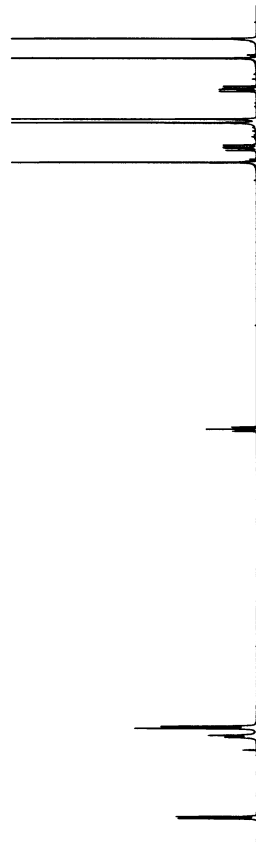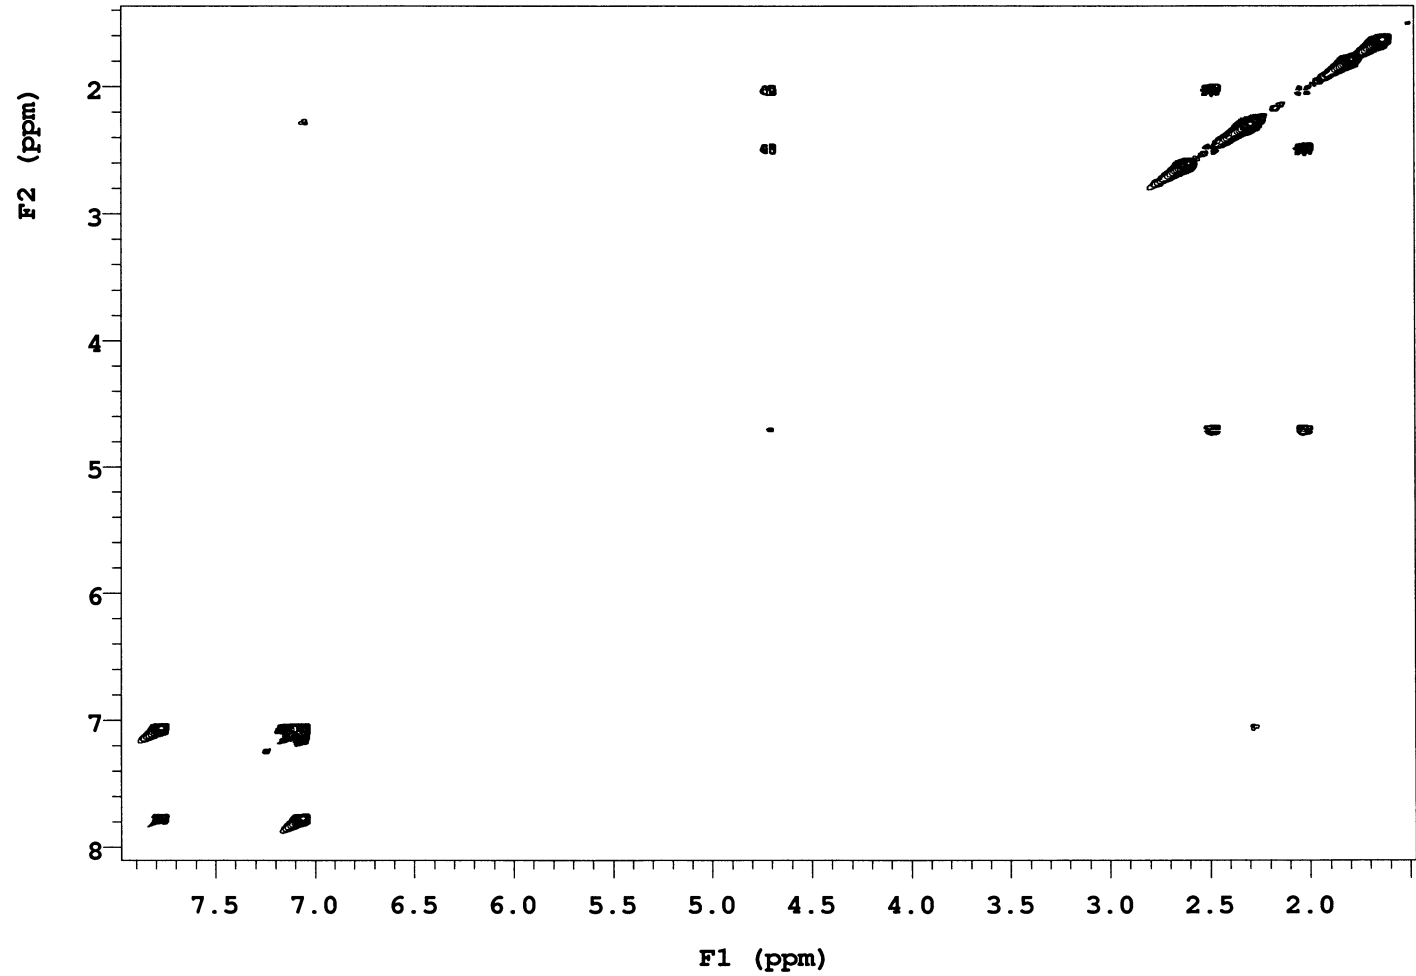

COSY of compound 2eb

Sample Name **IRR-03-008**  
Date collected **2024-02-27**

Pulse sequence **NOESY**  
Solvent **cdcl3**

Temperature **25**  
Spectrometer **Agilent-NMR-inova500**

Study owner **vnmr2**  
Operator **vnmr2**

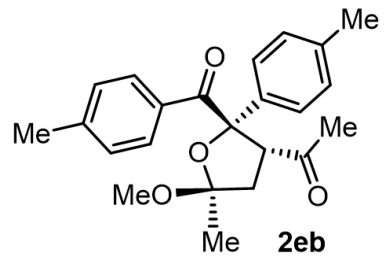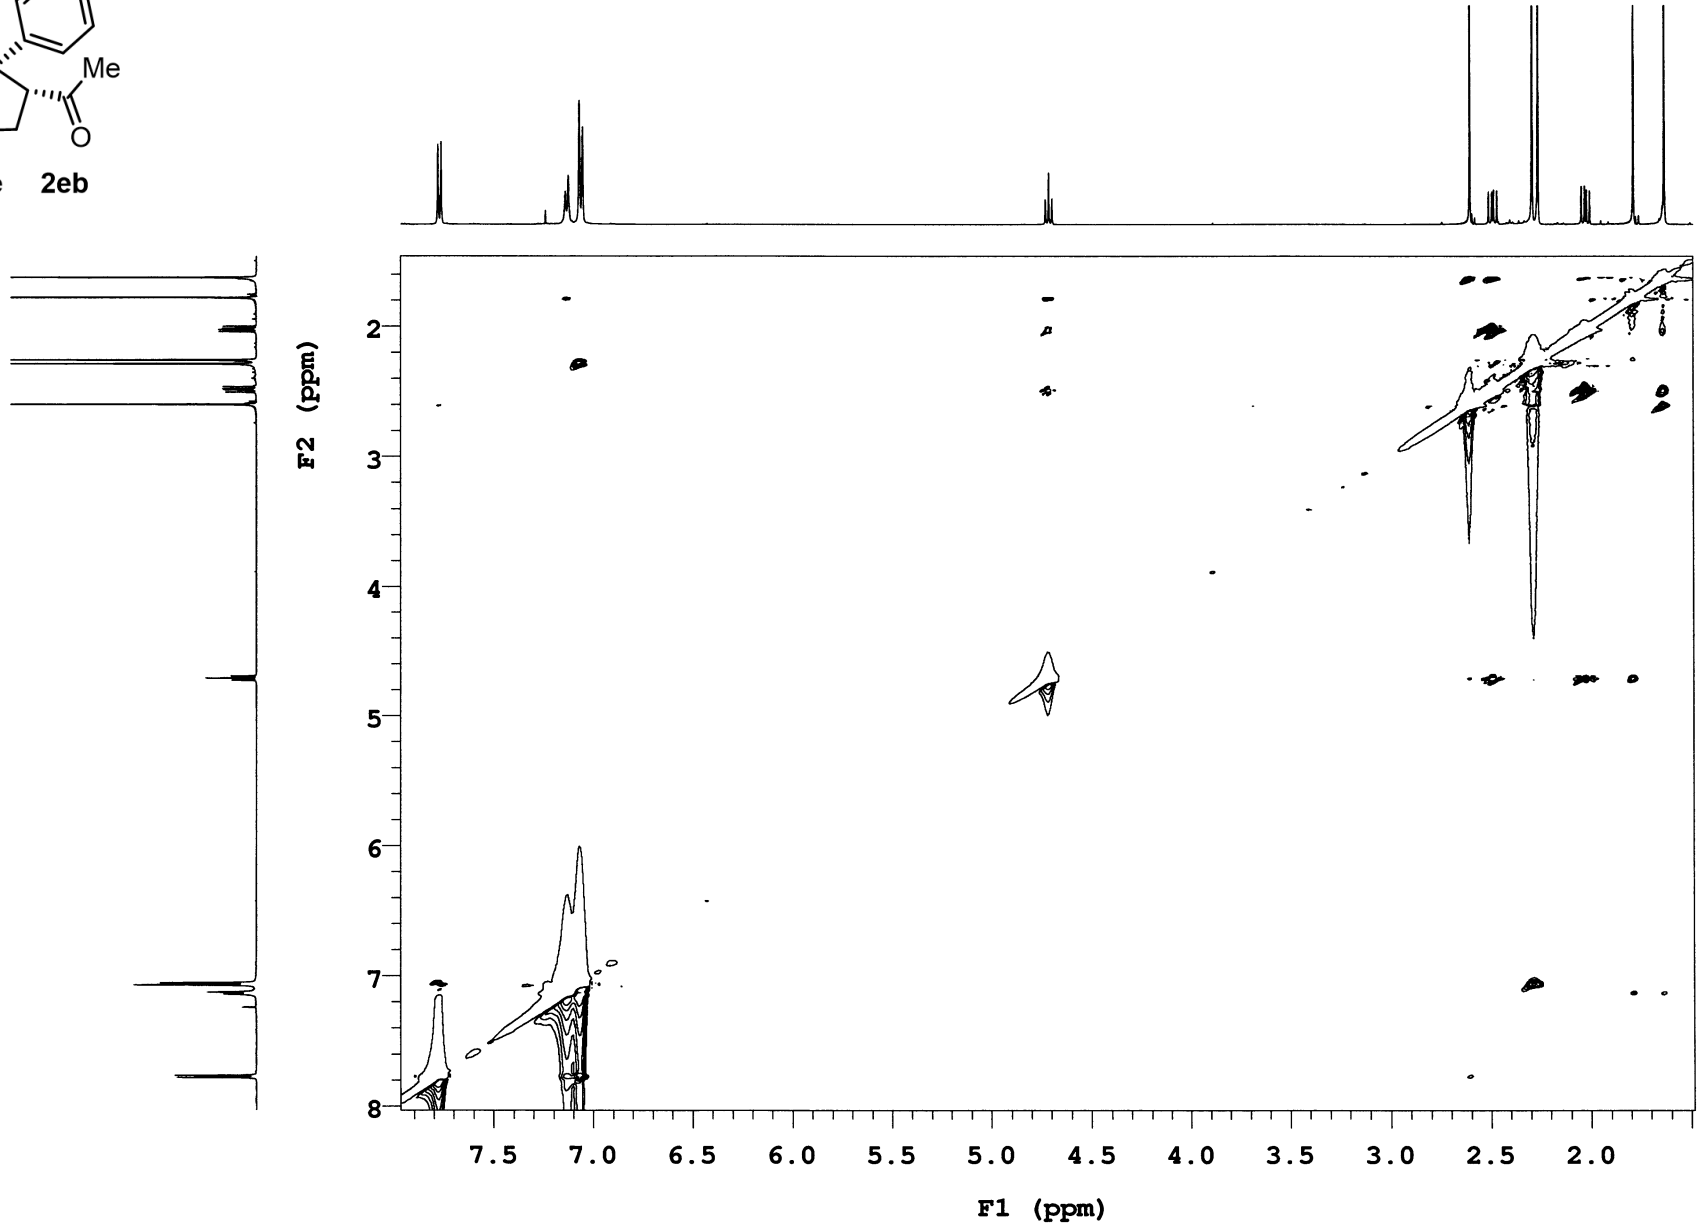

NOESY of compound 2eb

Sample Name **IRR-03-009**  
Date collected **2024-02-23**Pulse sequence **PROTON**  
Solvent **cdcl3**Temperature **25**  
Spectrometer **Agilent-NMR-inova500**Study owner **vnmr2**  
Operator **vnmr2**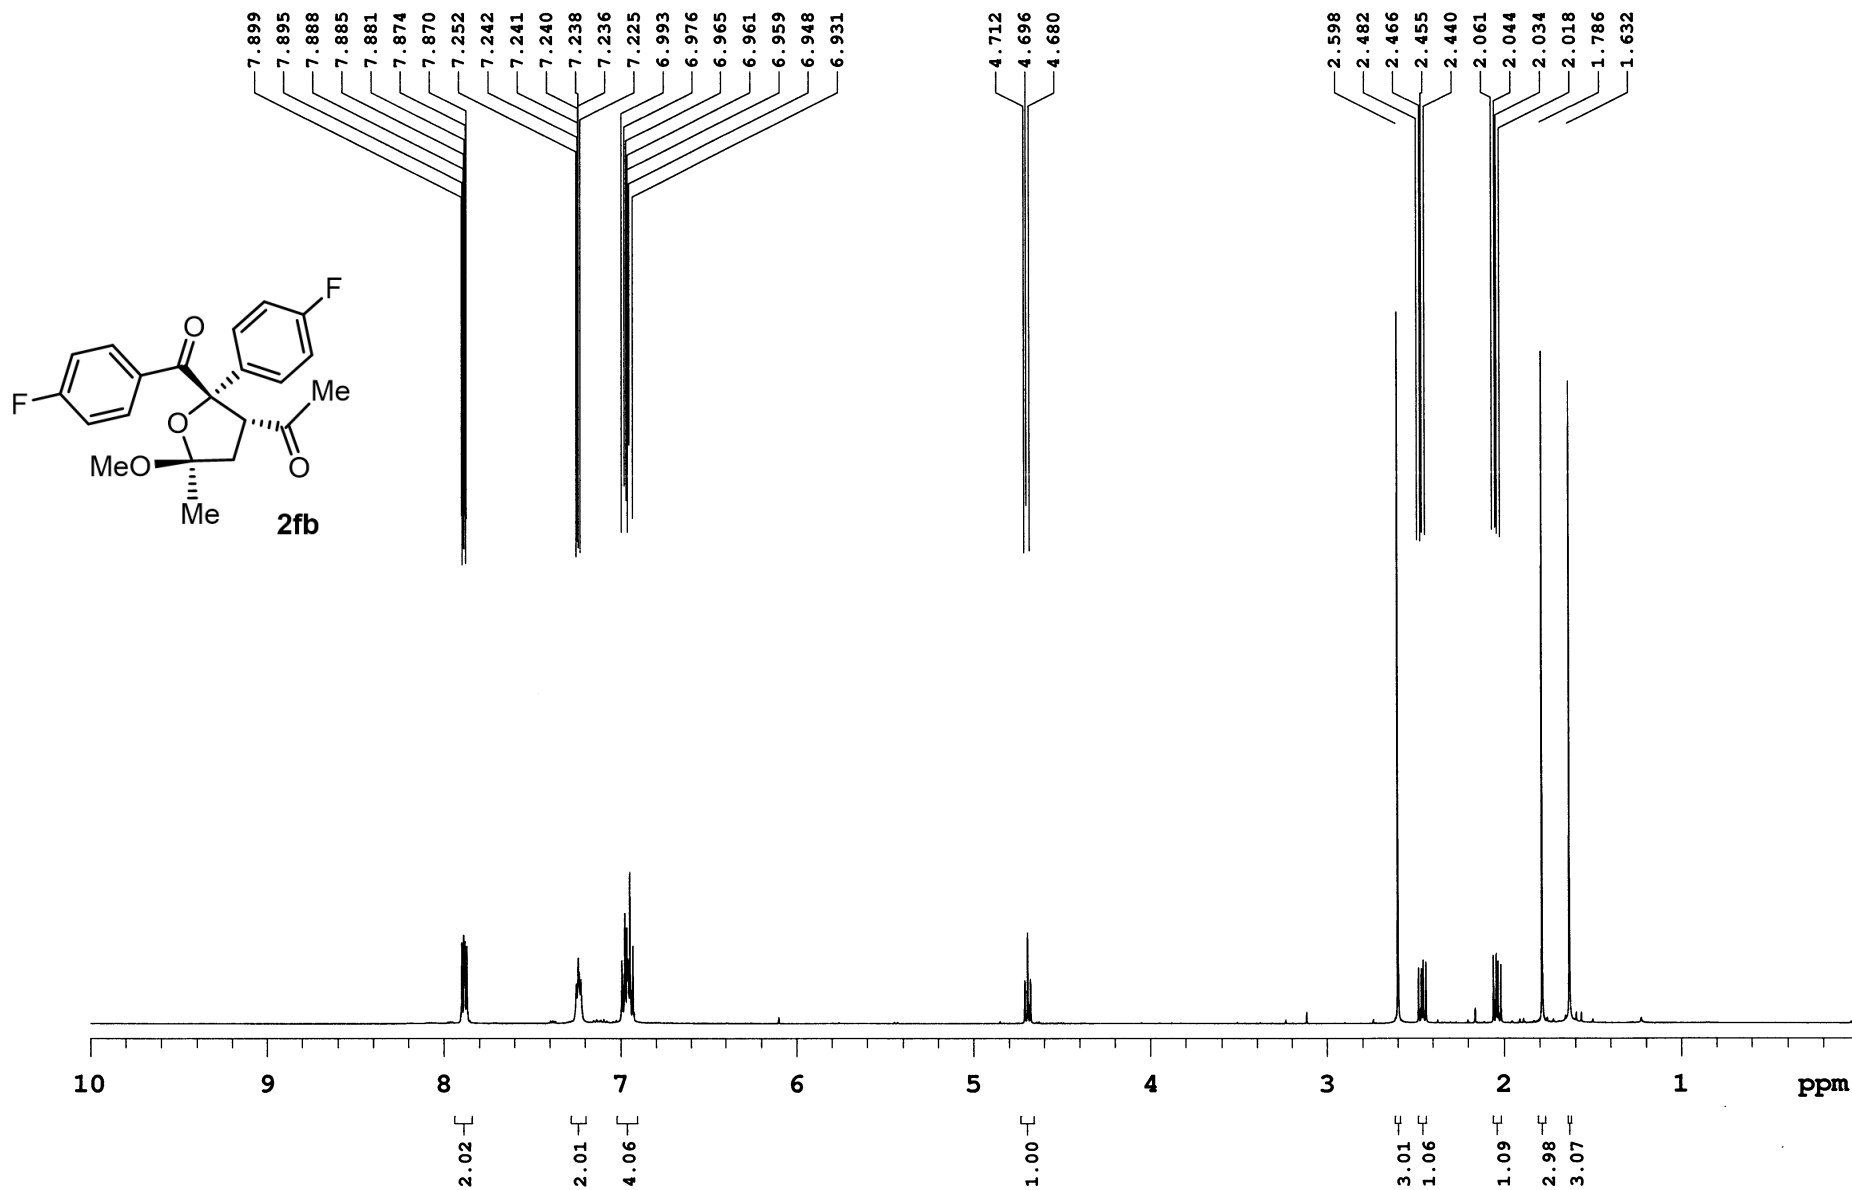



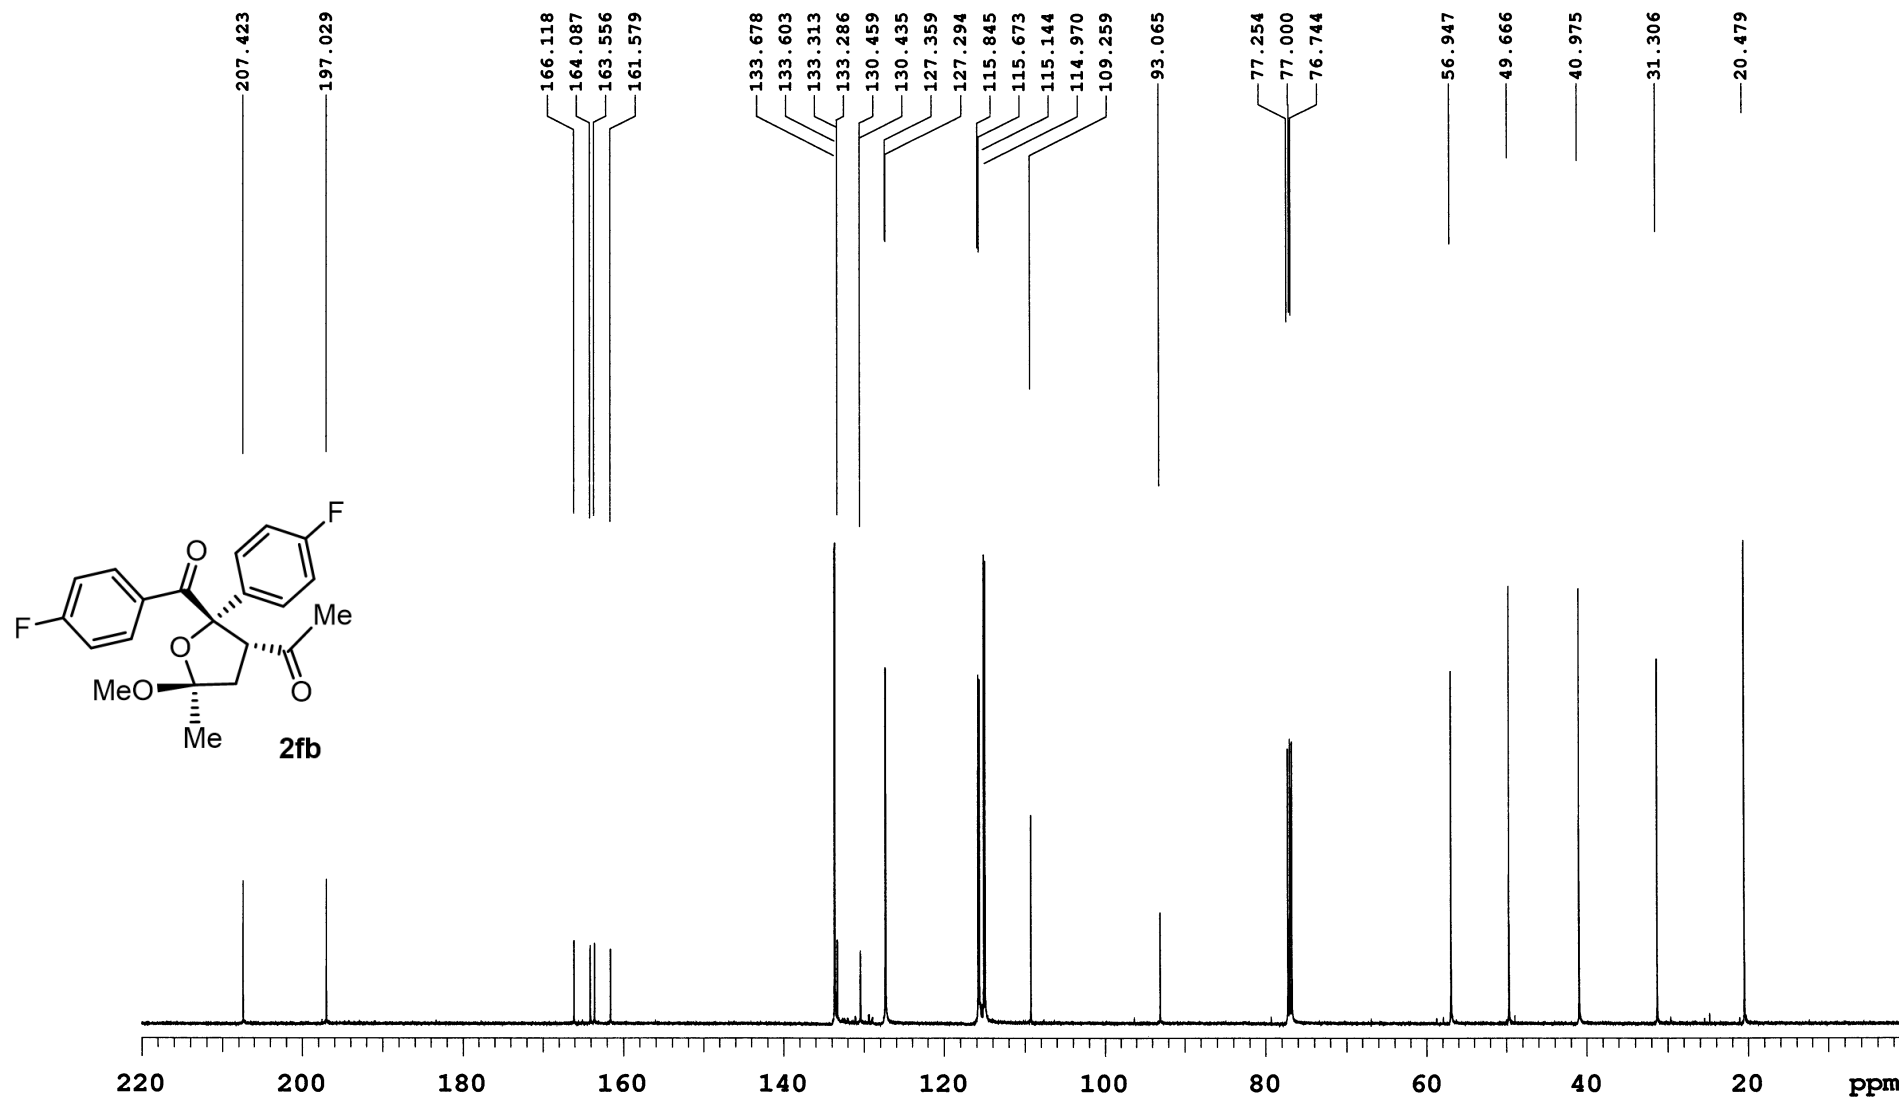13C NMR (125 MHz, CDCl<sub>3</sub>) of compound 2fb

IRR-03-009

Sample Name **IRR-03-009**  
Date collected **2024-02-24**Pulse sequence **DEPT**  
Solvent **cdcl3**Temperature **25**  
Spectrometer **Agilent-NMR-inova500**Study owner **vnmr2**  
Operator **vnmr2**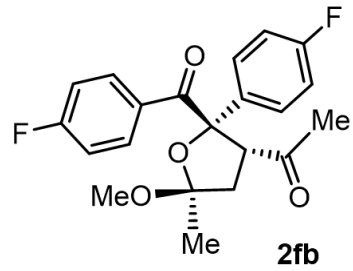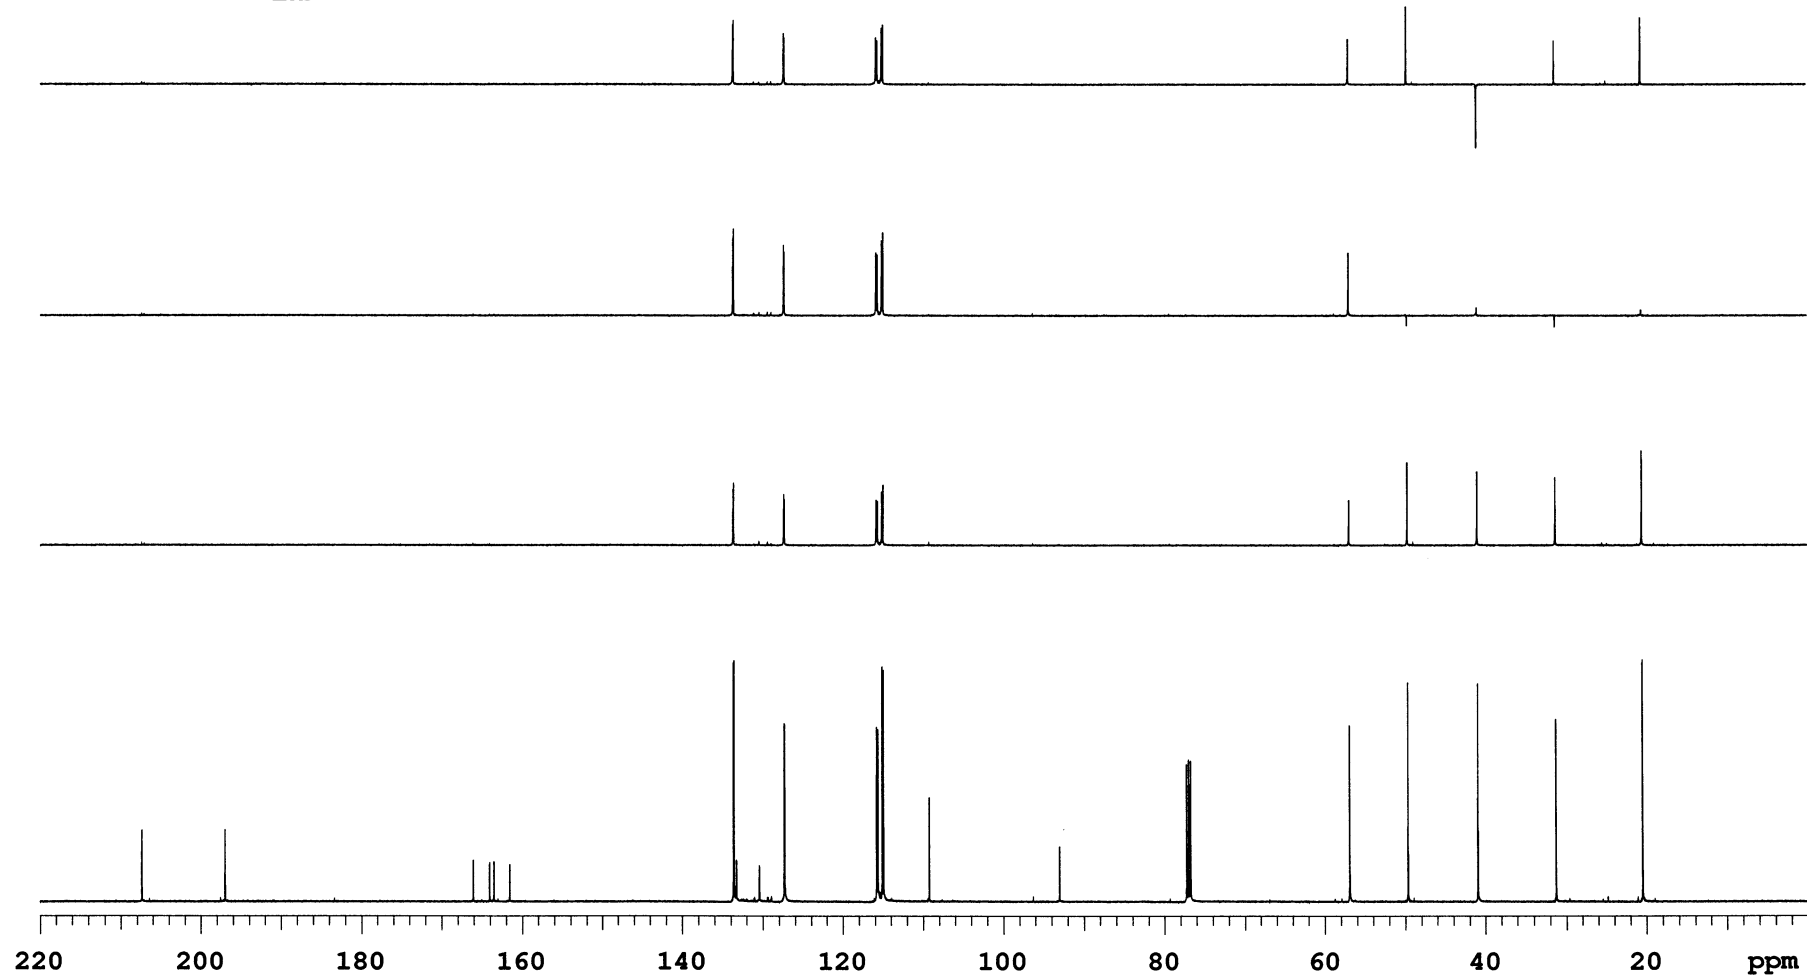

DEPT of compound 2fb

Sample Name **IRR-03-009**  
Date collected **2024-02-24**

Pulse sequence **gHSQC**  
Solvent **cdcl3**

Temperature **25**  
Spectrometer **Agilent-NMR-inova500**

Study owner **vnmr2**  
Operator **vnmr2**

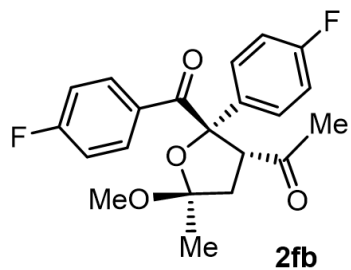**2fb**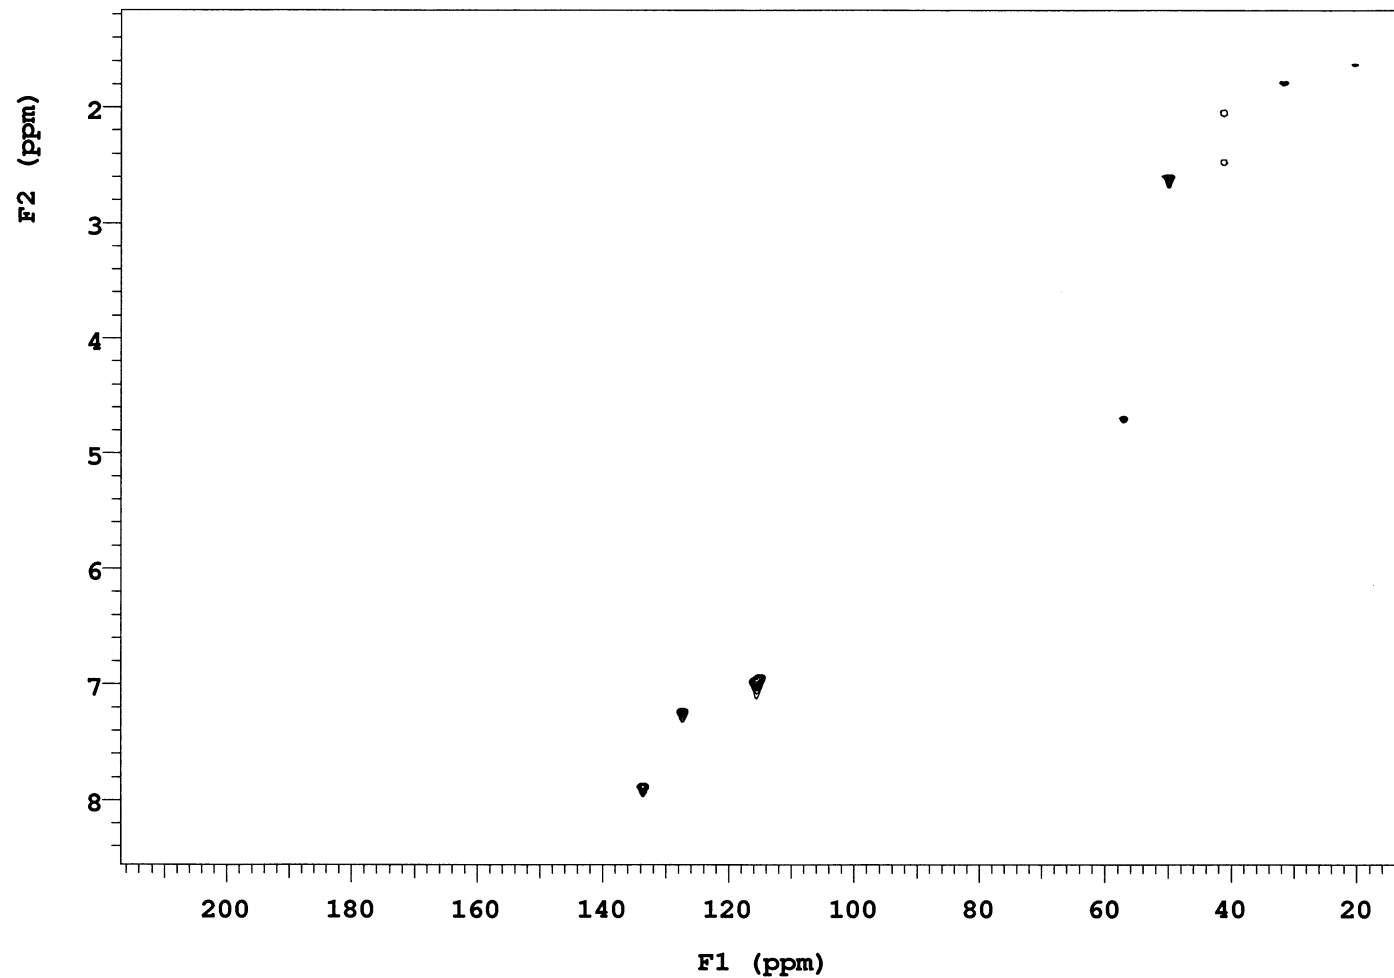

HSQC of compound 2fb

Sample Name **IRR-03-009**  
Date collected **2024-02-24**Pulse sequence **gCOSY**  
Solvent **cdcl3**Temperature **25**  
Spectrometer **Agilent-NMR-inova500**Study owner **vnmr2**  
Operator **vnmr2**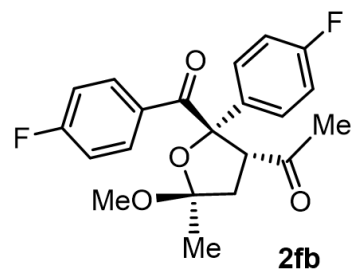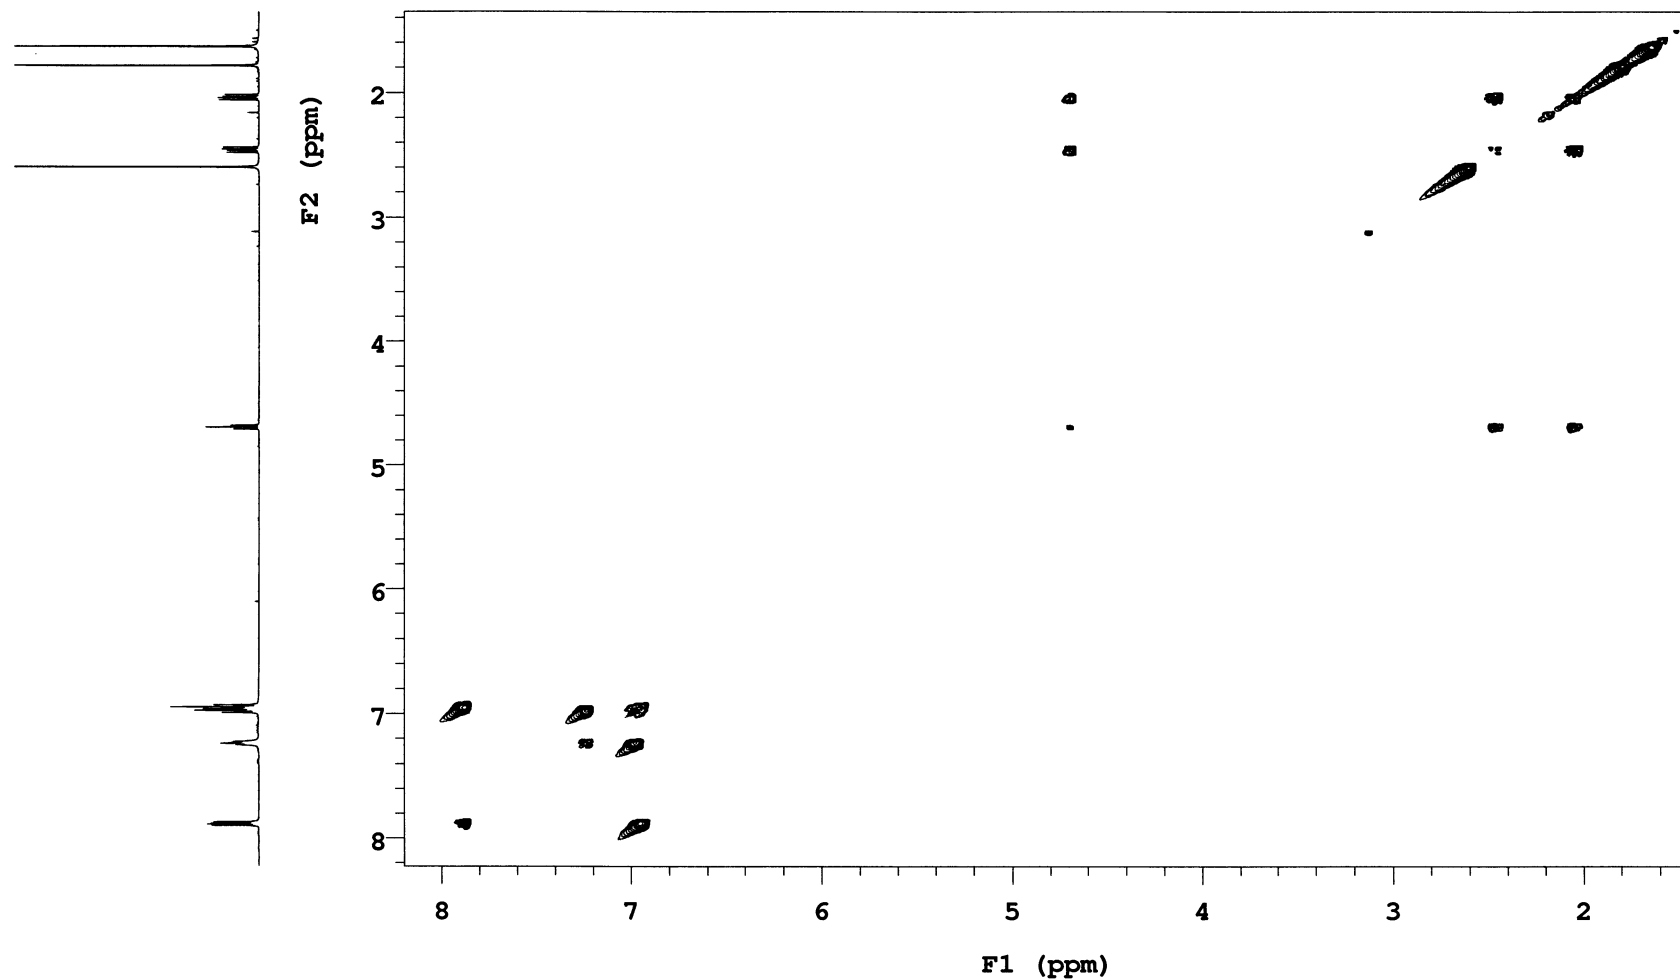

COSY of compound 2fb

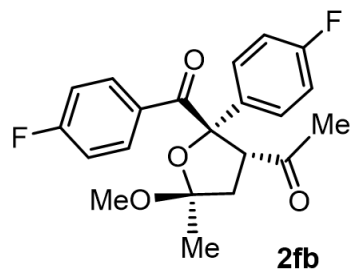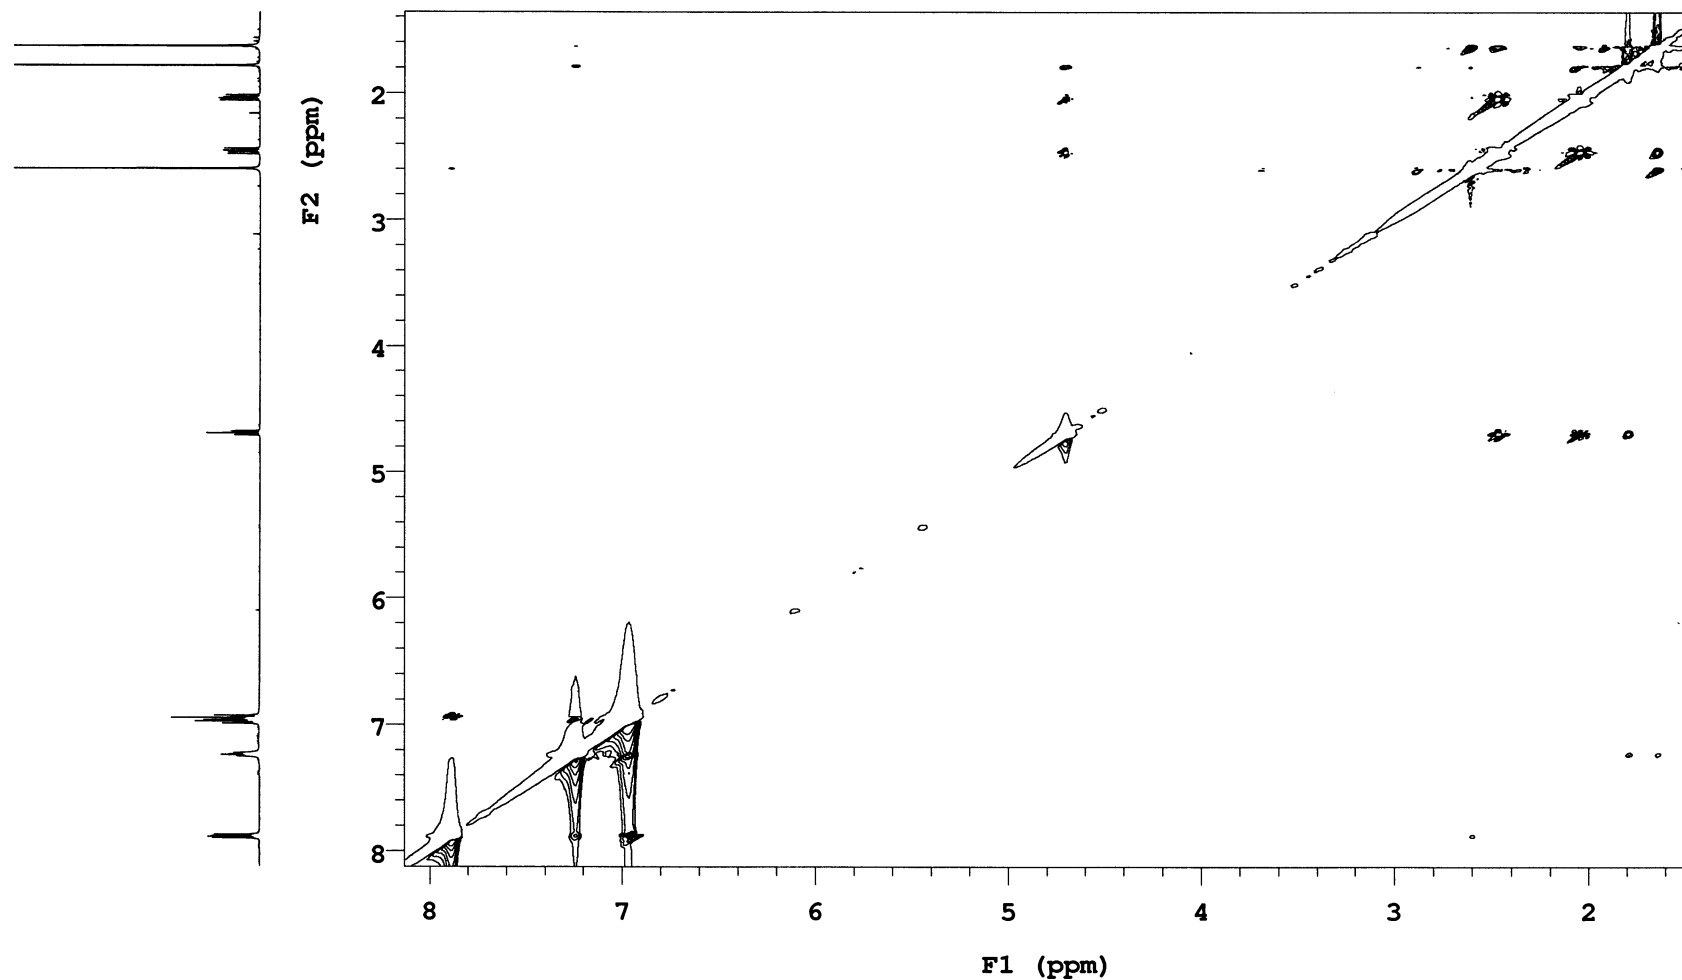

NOESY of compound 2fb

Sample Name IRR-03-009  
Date collected 2024-02-23

Pulse sequence FLUORINE  
Solvent cdcl3

Temperature 25  
Spectrometer Agilent-NMR-inova500

Study owner vnmr2  
Operator vnmr2

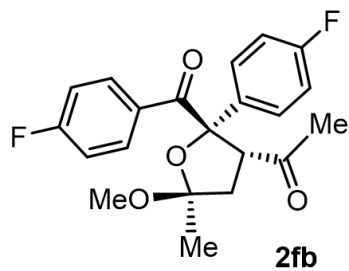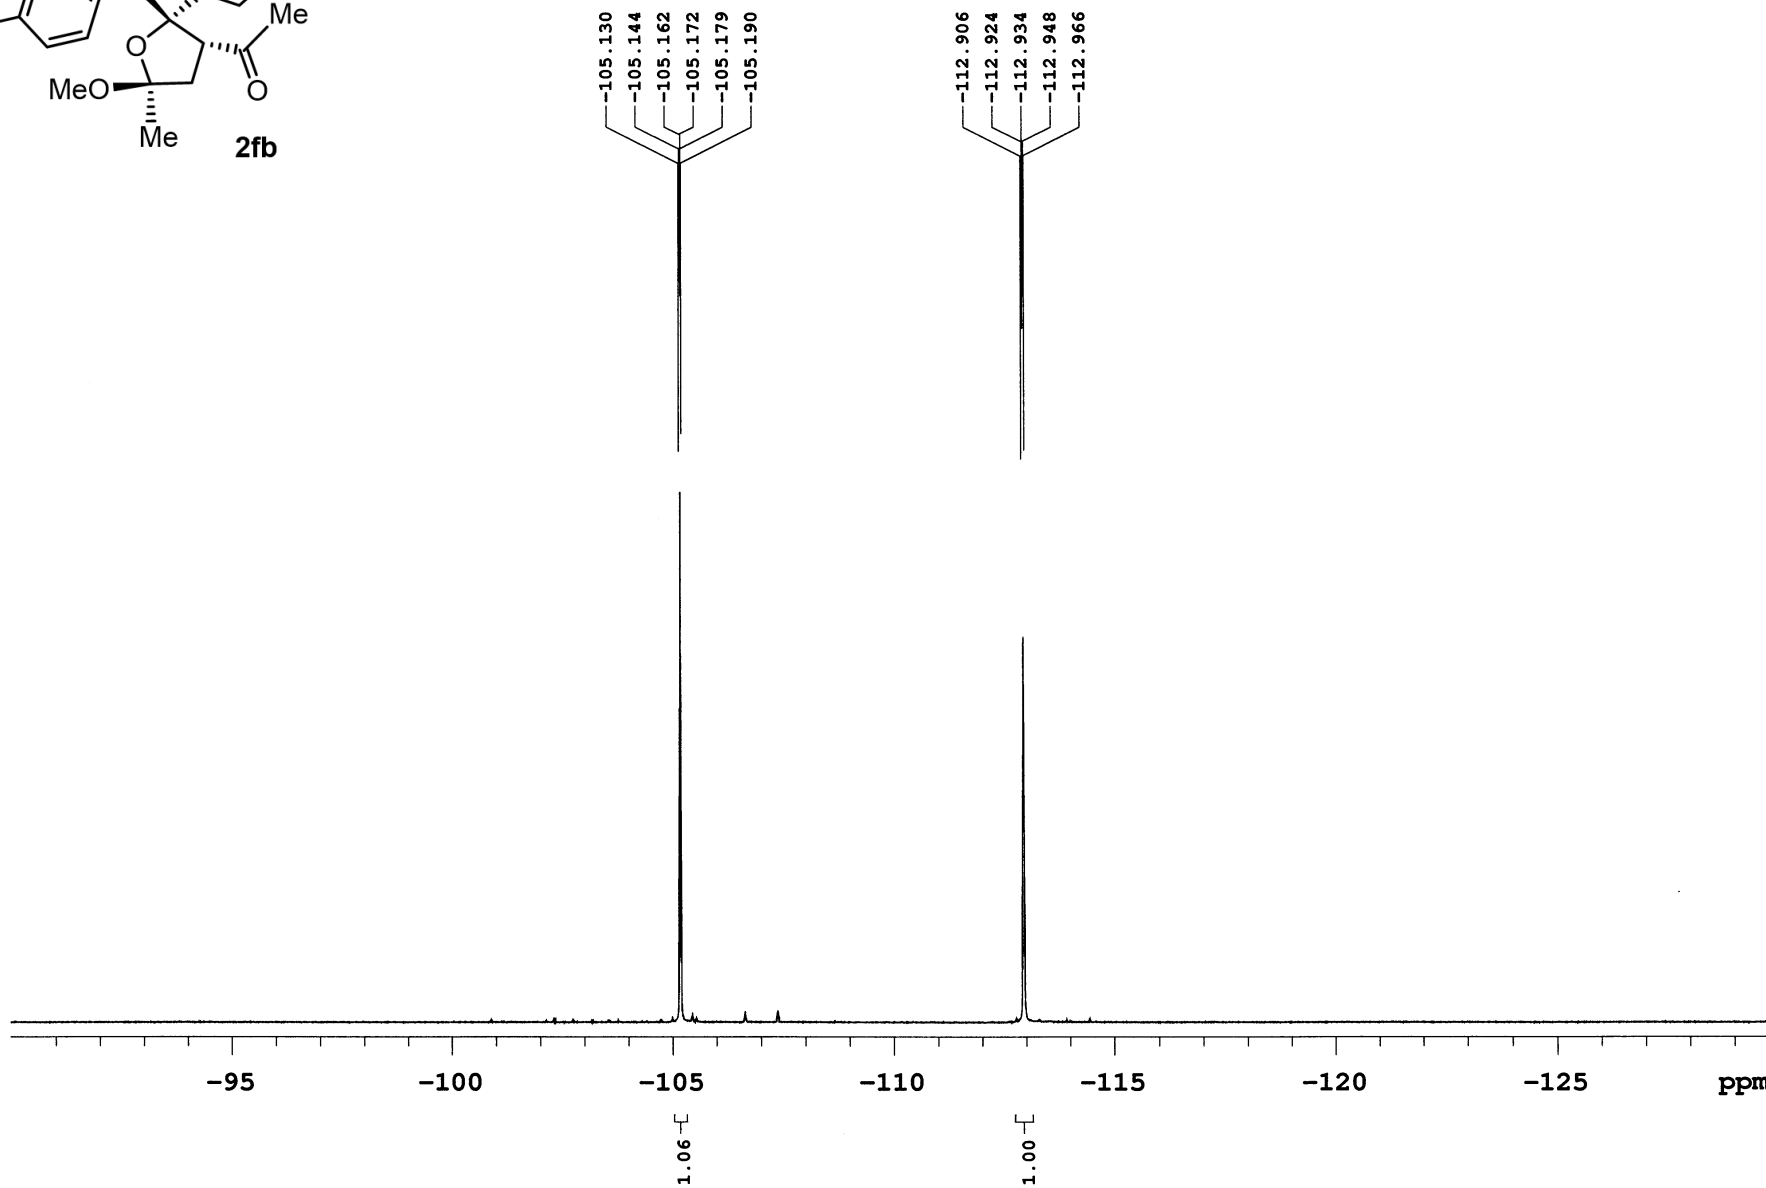

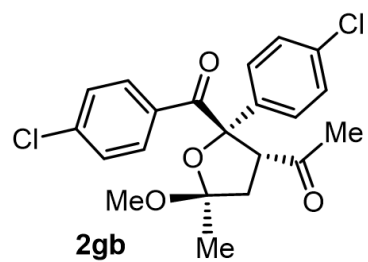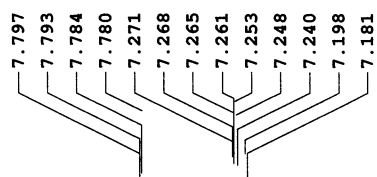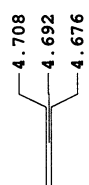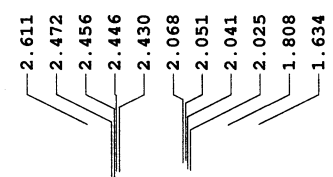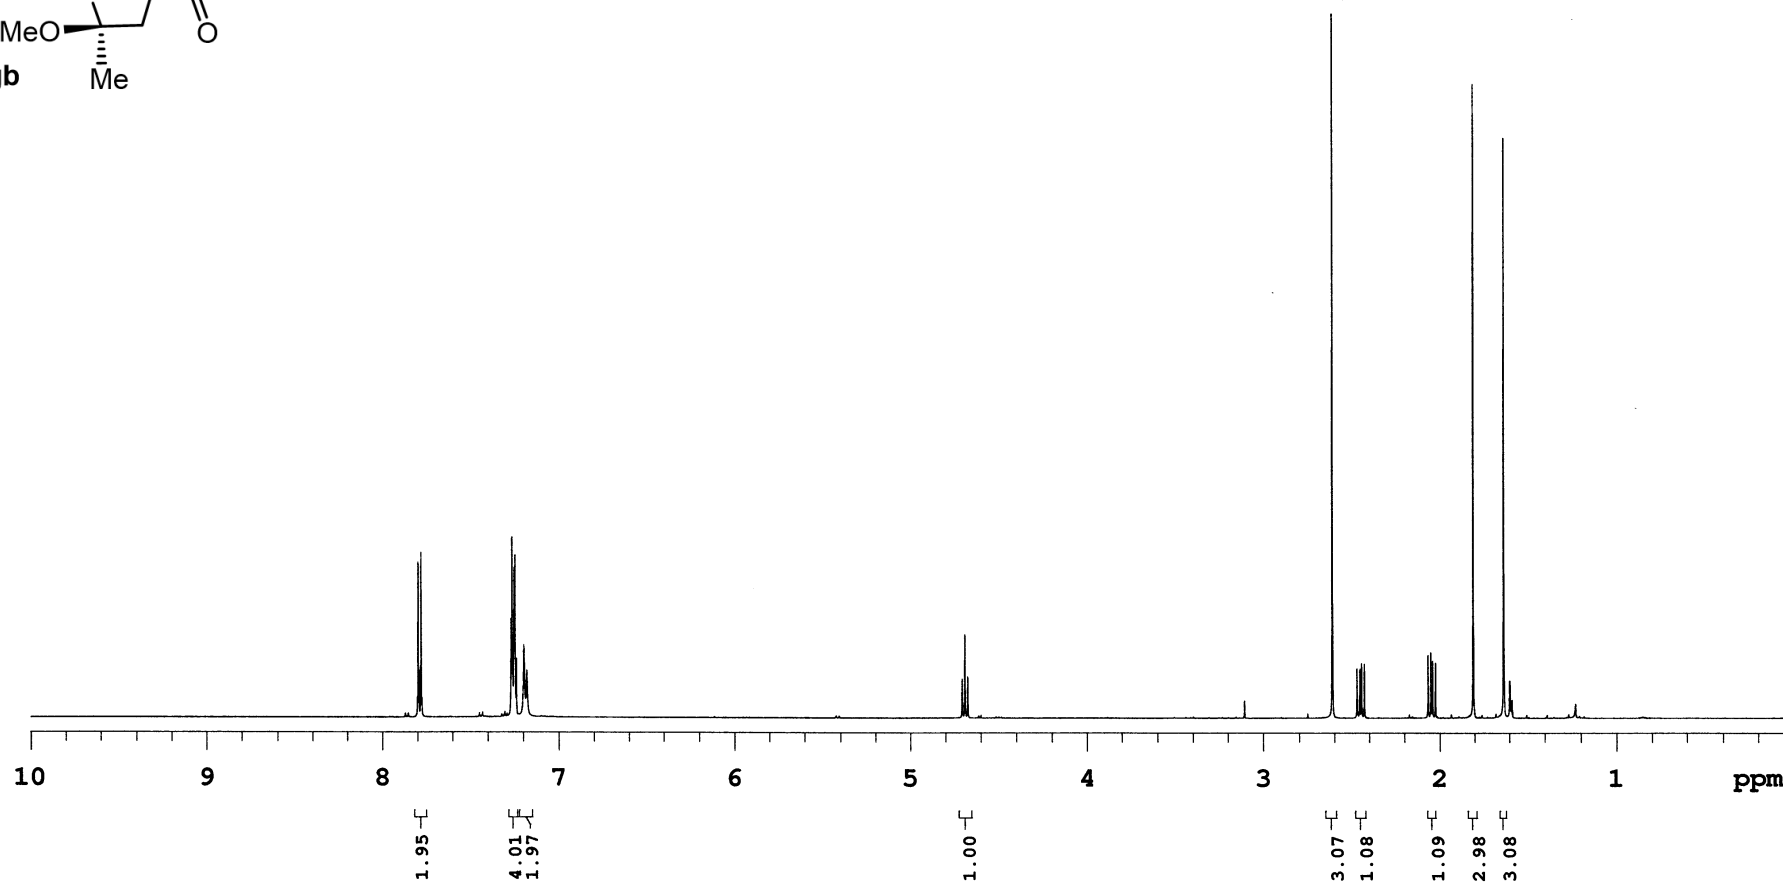

Sample Name IRR-03-075 Pulse sequence CARBON Temperature 25  
Date collected 2024-06-05 Solvent cdcl3 Spectrometer Agilent-NMR-inova500 Operator vnmr2

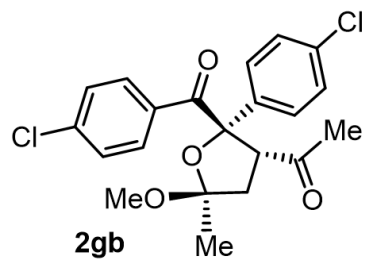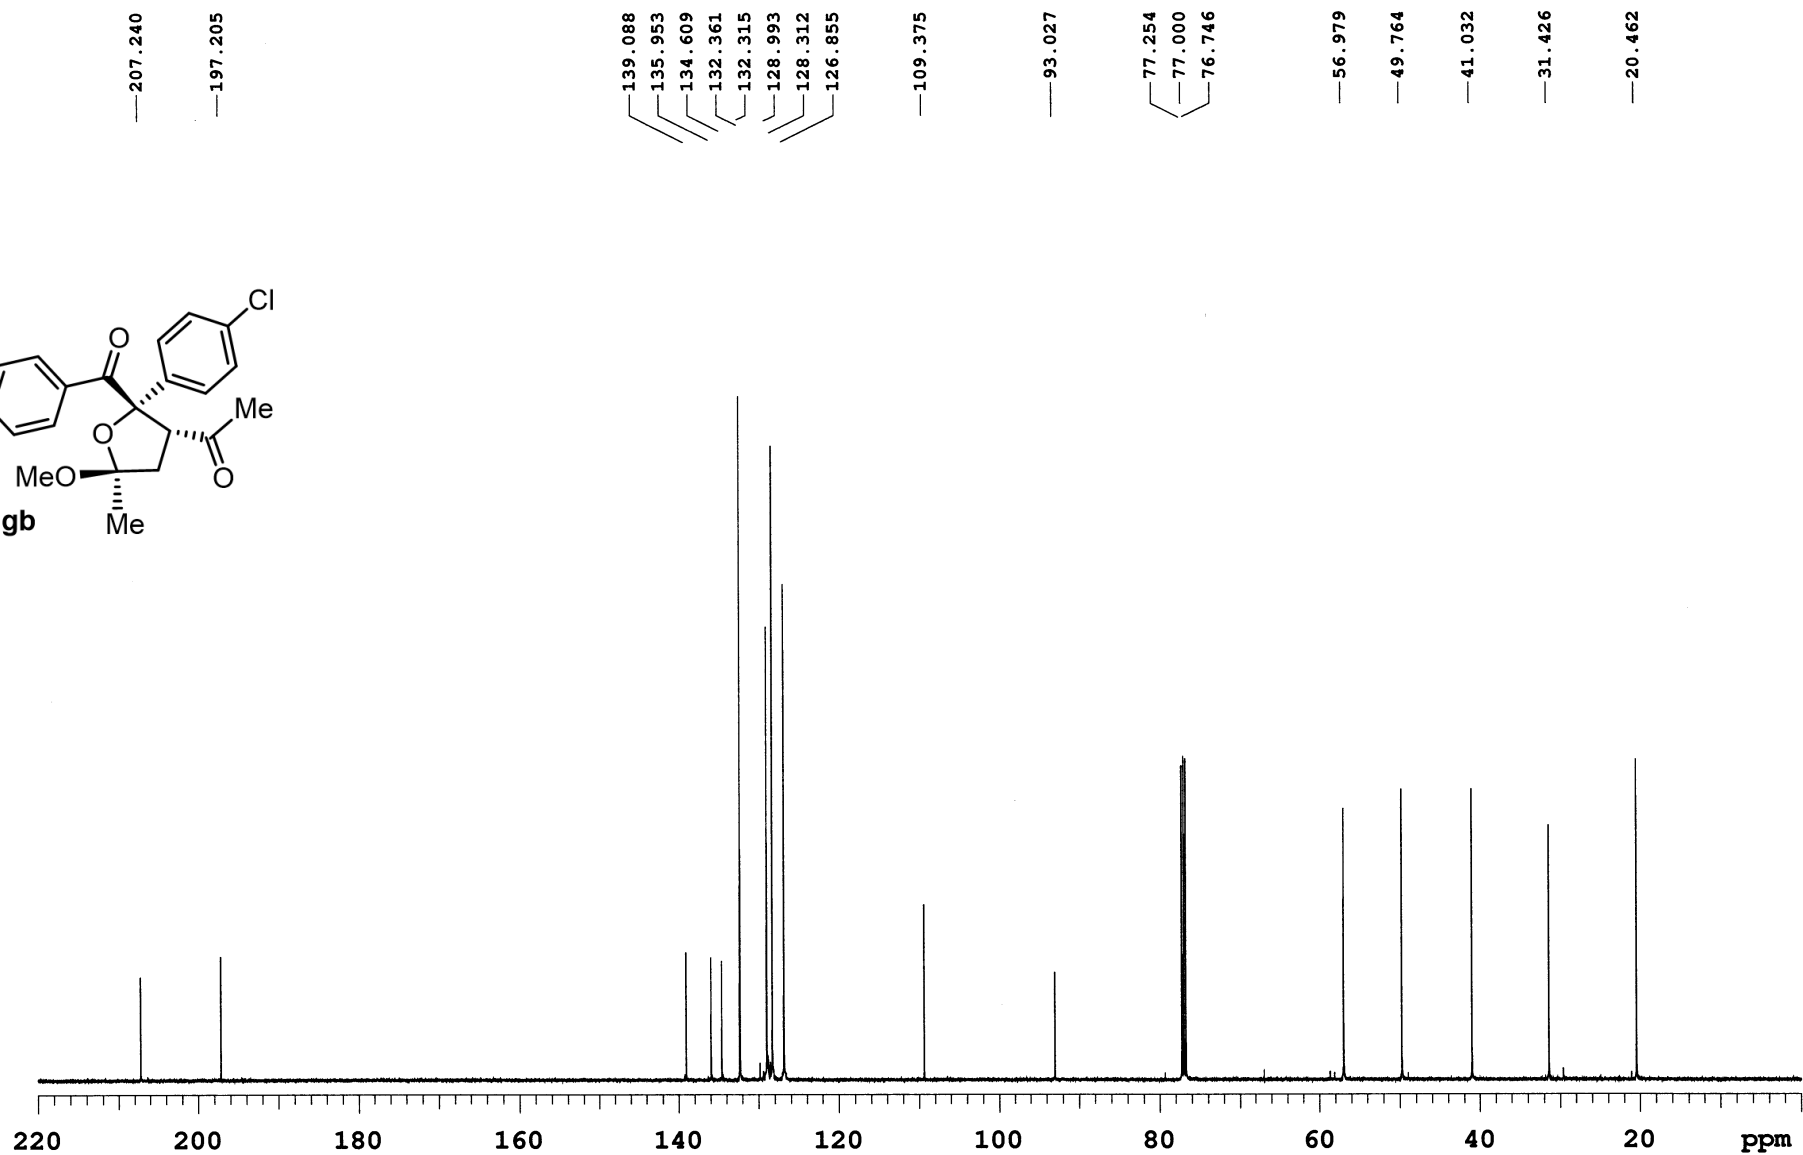

<sup>13</sup>C NMR (125 MHz, CDCl<sub>3</sub>) of compound 2gb



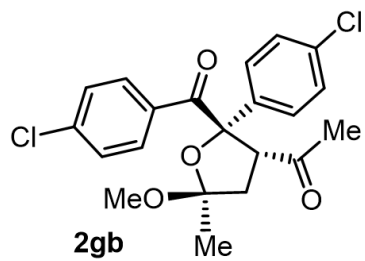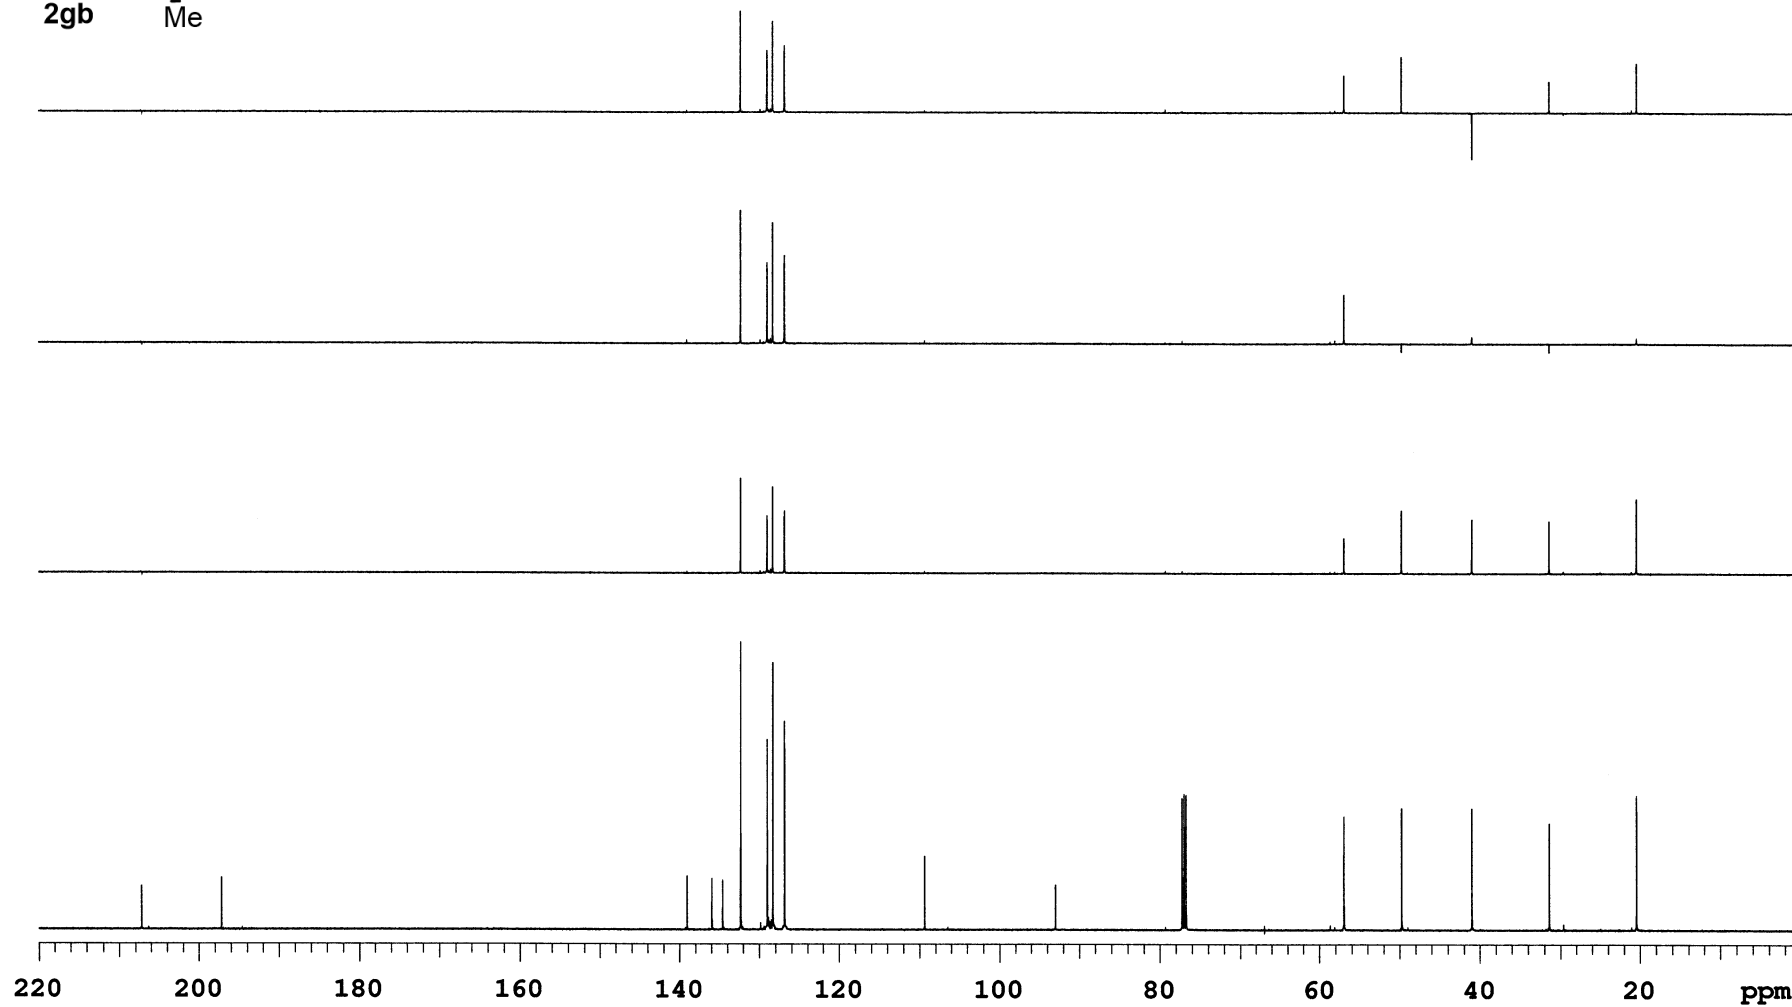

DEPT of compound 2gb

IRR-03-075

Sample Name IRR-03-075  
Date collected 2024-06-04

Pulse sequence gHSQC  
Solvent cdcl3

Temperature 25  
Spectrometer Agilent-NMR-inova500

Study owner vnmr2  
Operator vnmr2

S106

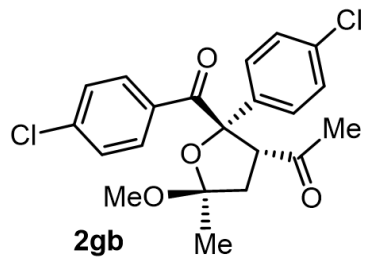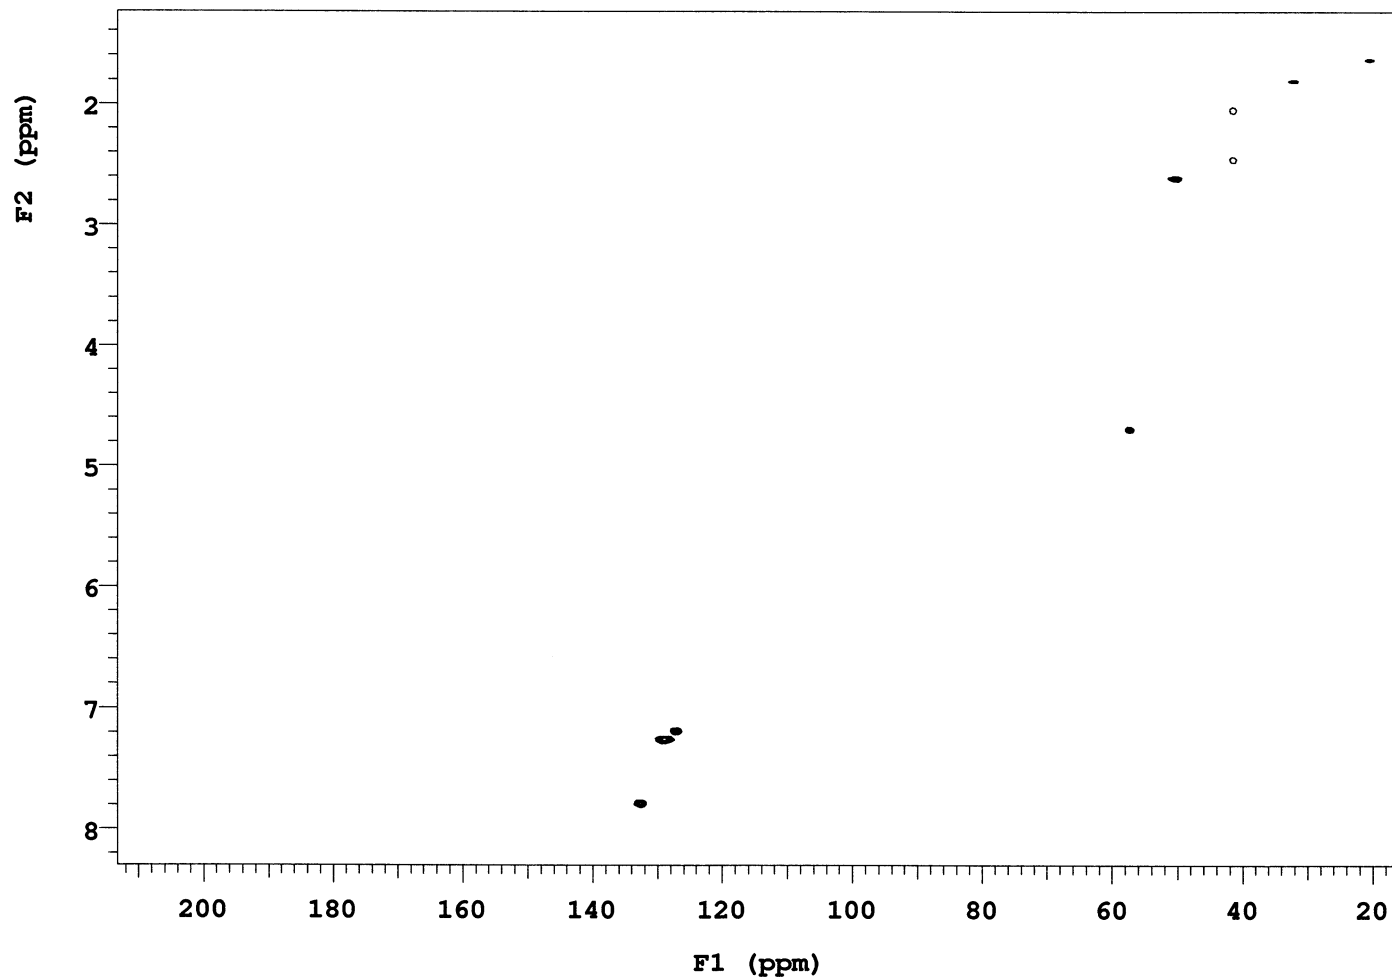

HSQC of compound 2gb

IRR-03-075

Sample Name **IRR-03-075**  
Date collected **2024-06-04**

Pulse sequence **gCOSY**  
Solvent **cdcl3**

Temperature **25**  
Spectrometer **Agilent-NMR-inova500**

Study owner **vnmr2**  
Operator **vnmr2**

S107

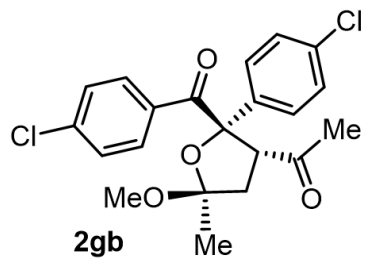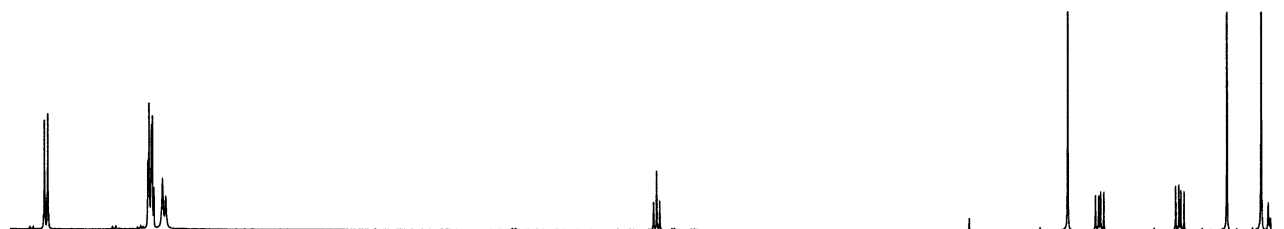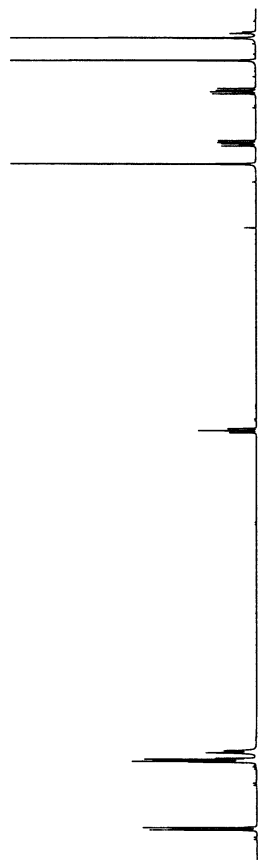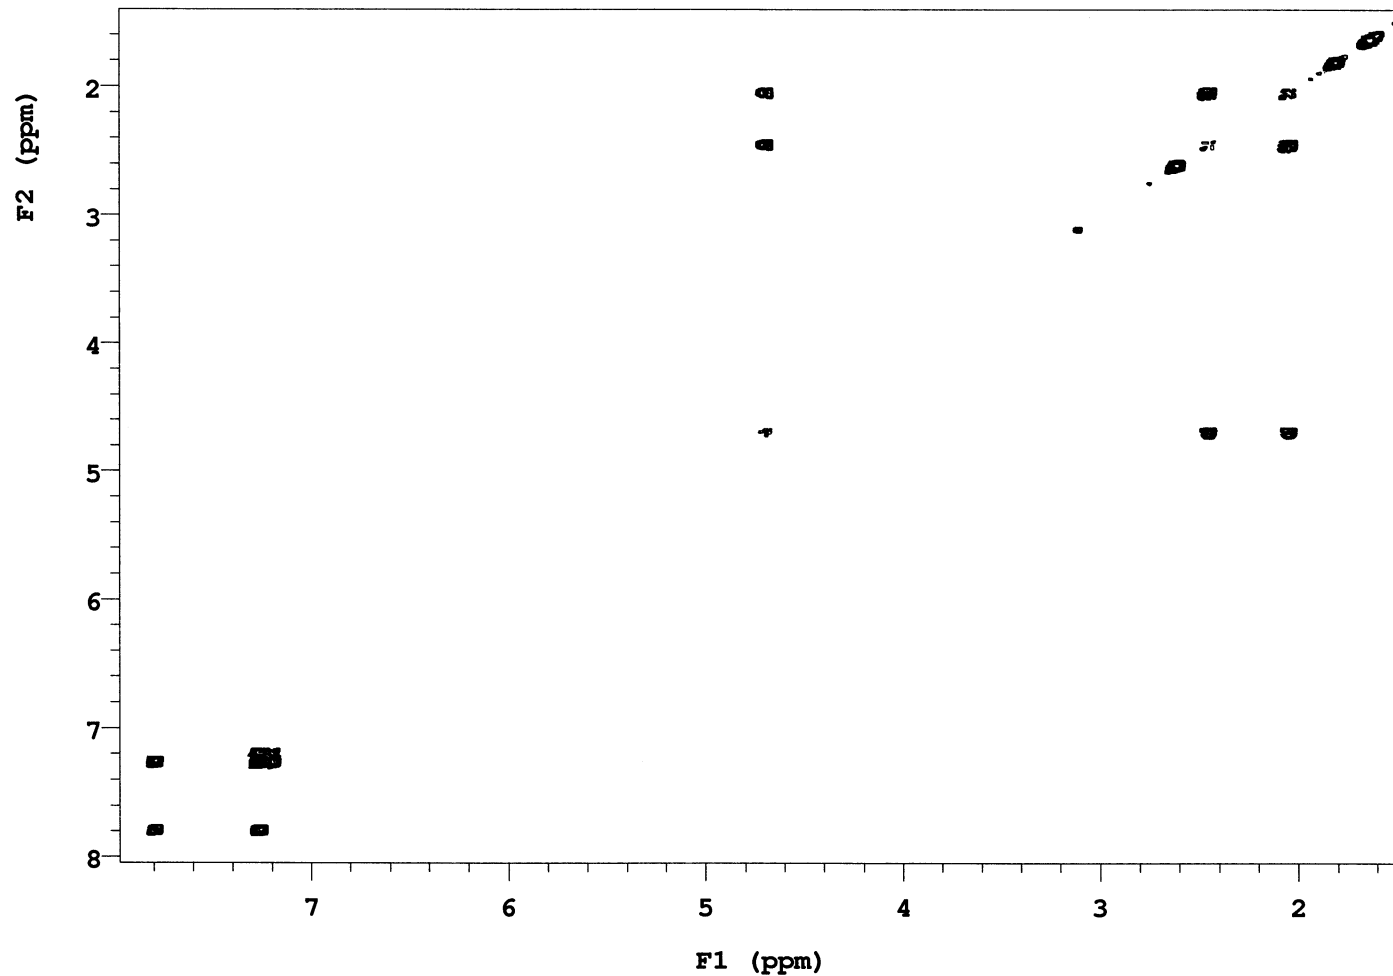

COSY of compound 2gb

Sample Name **IRR-03-075**  
Date collected **2024-06-04**

Pulse sequence **NOESY**  
Solvent **cdcl3**

Temperature **25**  
Spectrometer **Agilent-NMR-inova500**

Study owner **vnmr2**  
Operator **vnmr2**

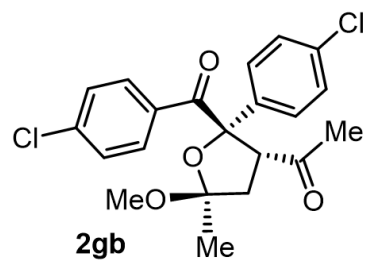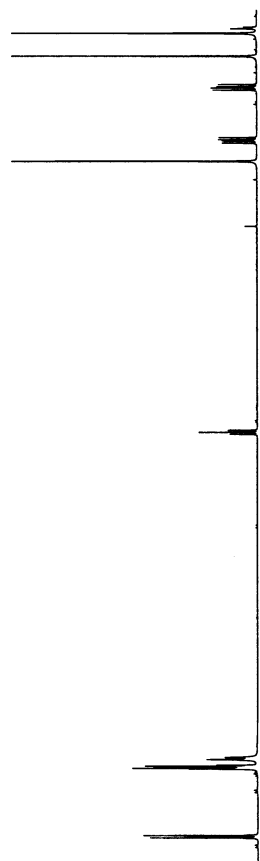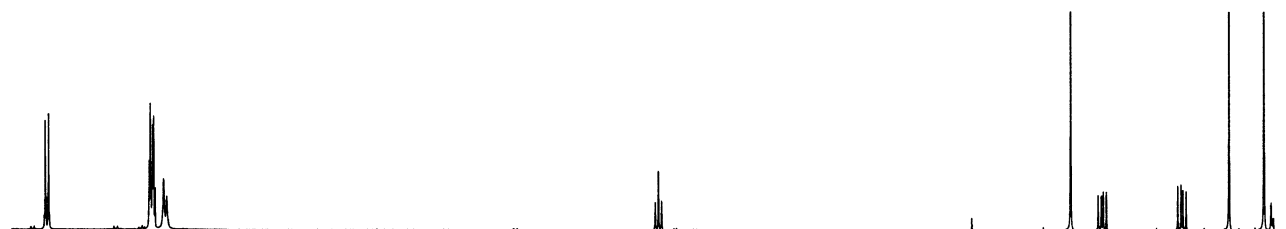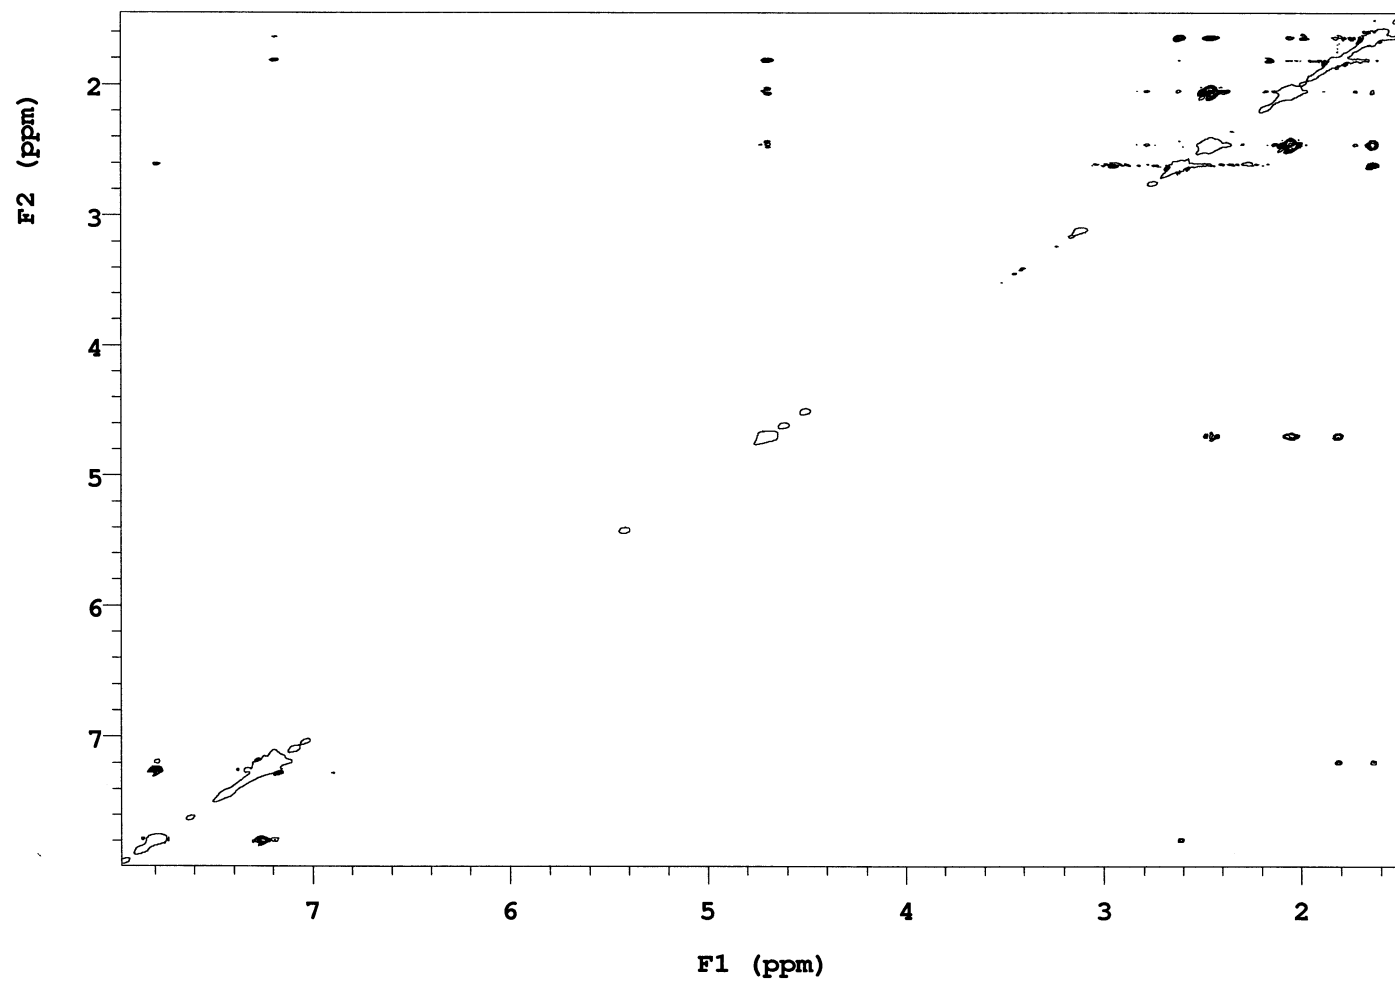

NOESY of compound 2gb

Sample Name IRR-03-077  
Date collected 2024-06-16

Pulse sequence PROTON  
Solvent cdcl3

Temperature 25  
Spectrometer Agilent-NMR-inova500

Study owner vnmr2  
Operator vnmr2

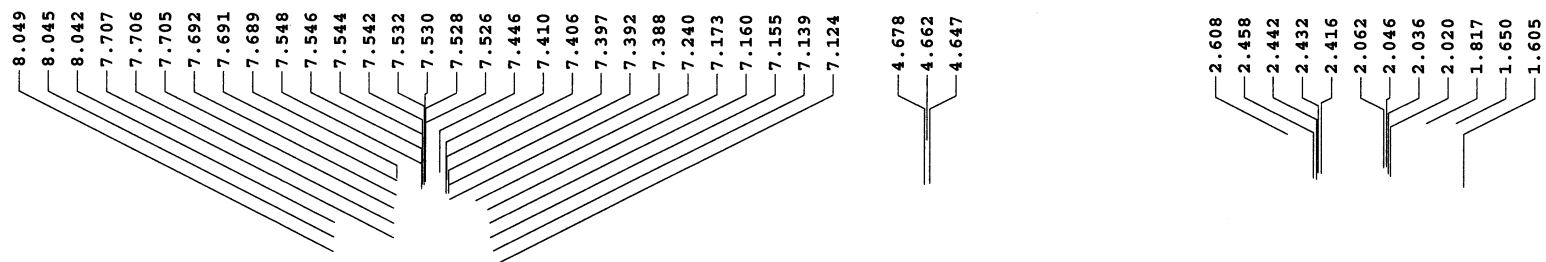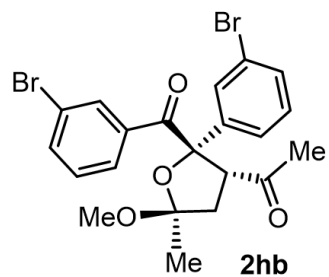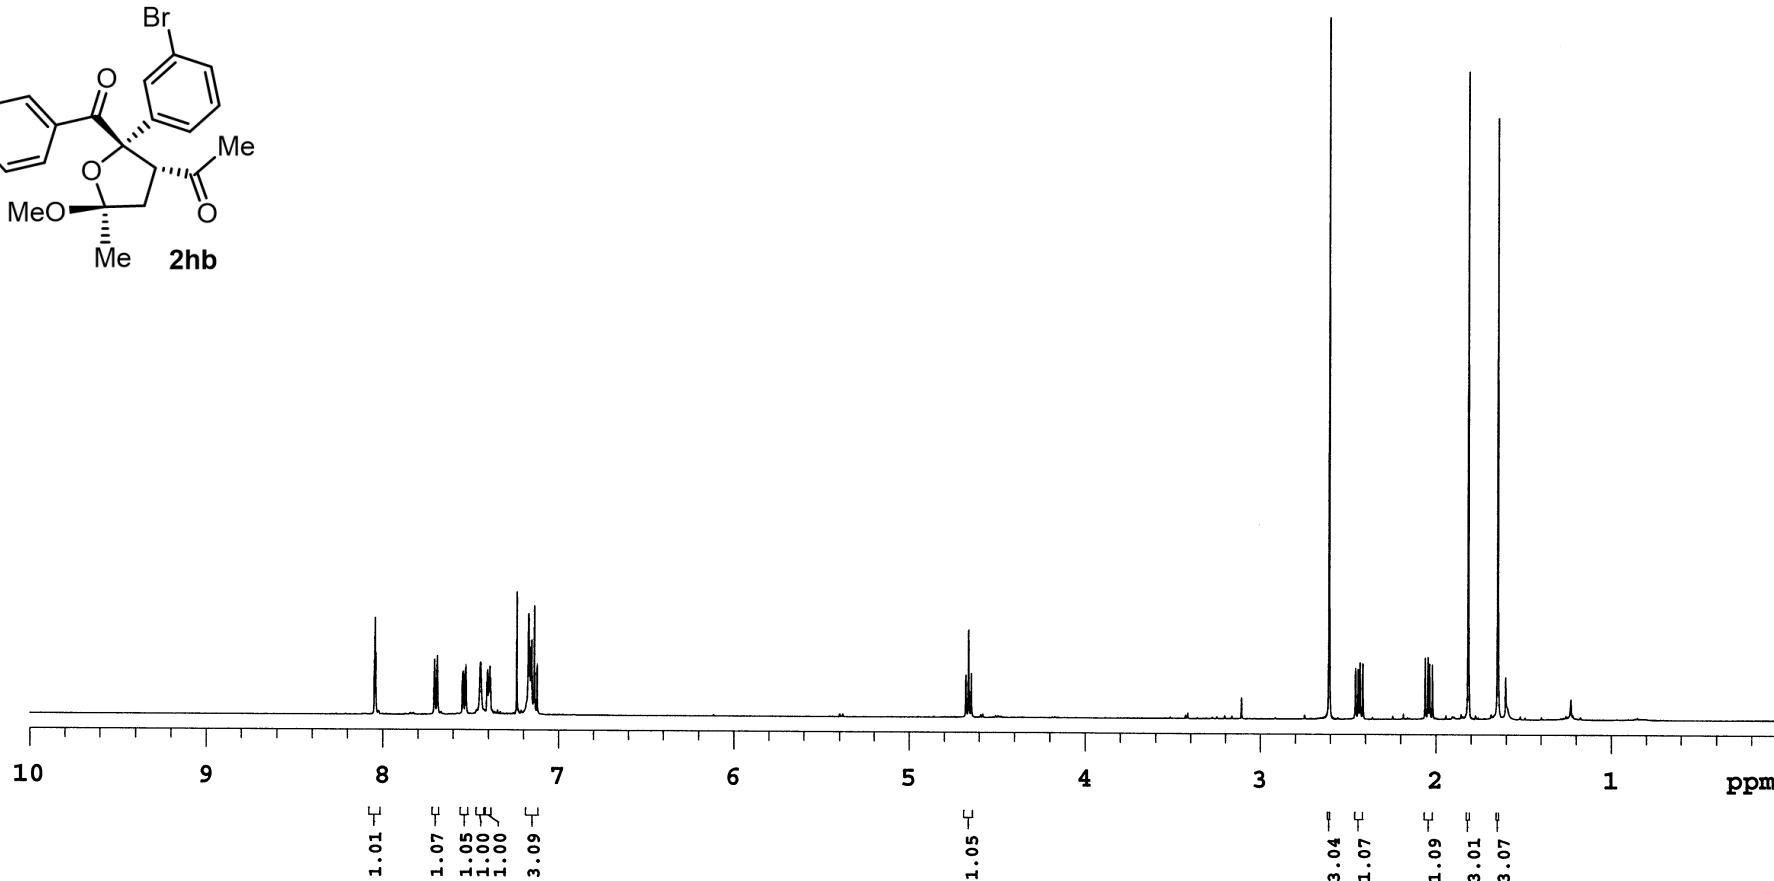

Sample Name IRR-03-077  
Date collected 2024-06-16Pulse sequence CARBON  
Solvent cdcl3Temperature 25  
Spectrometer Agilent-NMR-inova500Study owner vnmr2  
Operator vnmr2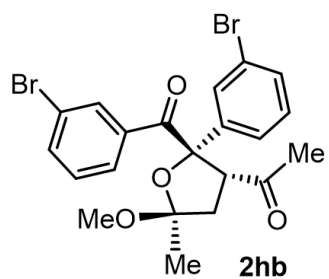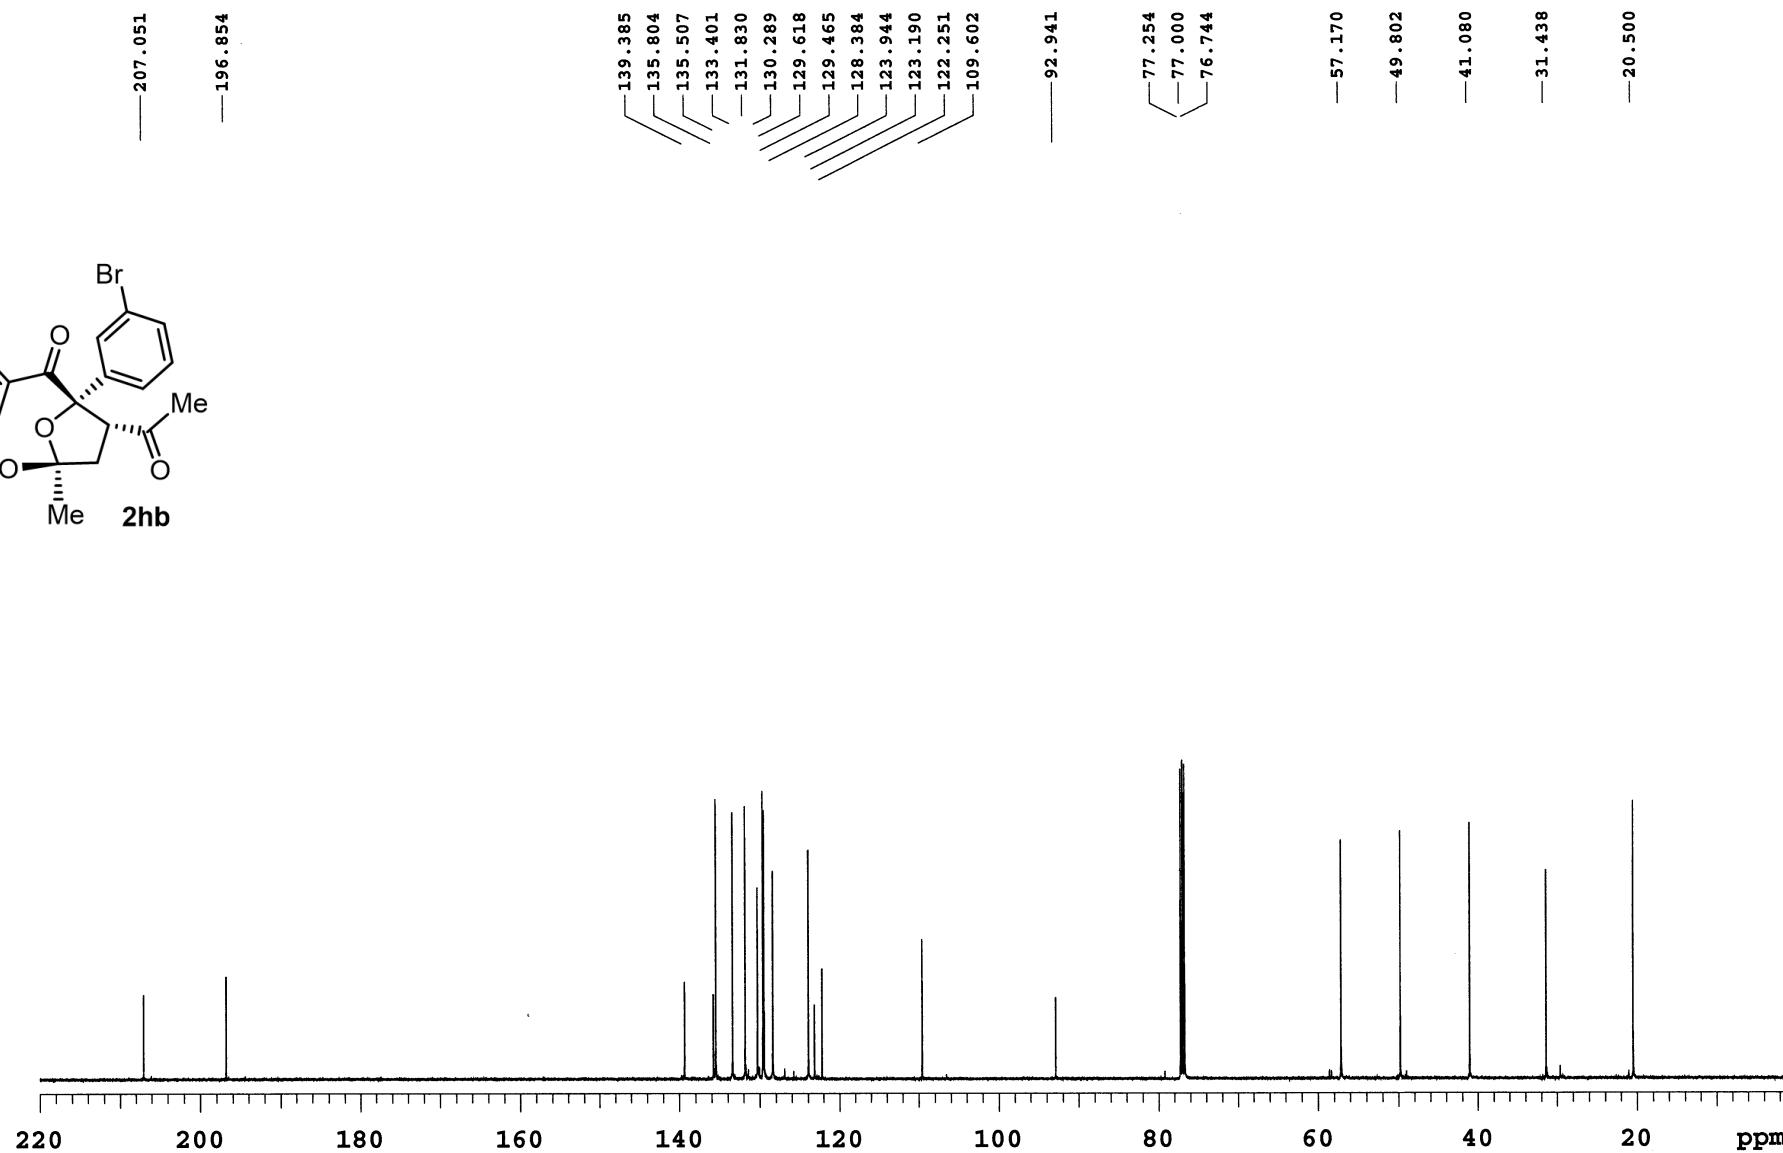

<sup>13</sup>C NMR (125 MHz, CDCl<sub>3</sub>) of compound 2hb

IRR-03-077

Sample Name IRR-03-077  
Date collected 2024-06-17

Pulse sequence DEPT  
Solvent cdcl3

Temperature 25  
Spectrometer Agilent-NMR-inova500

Study owner vnmr2  
Operator vnmr2

S111

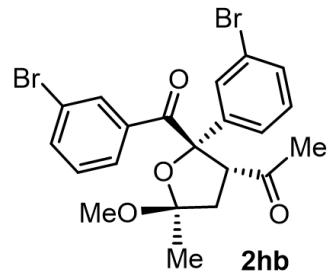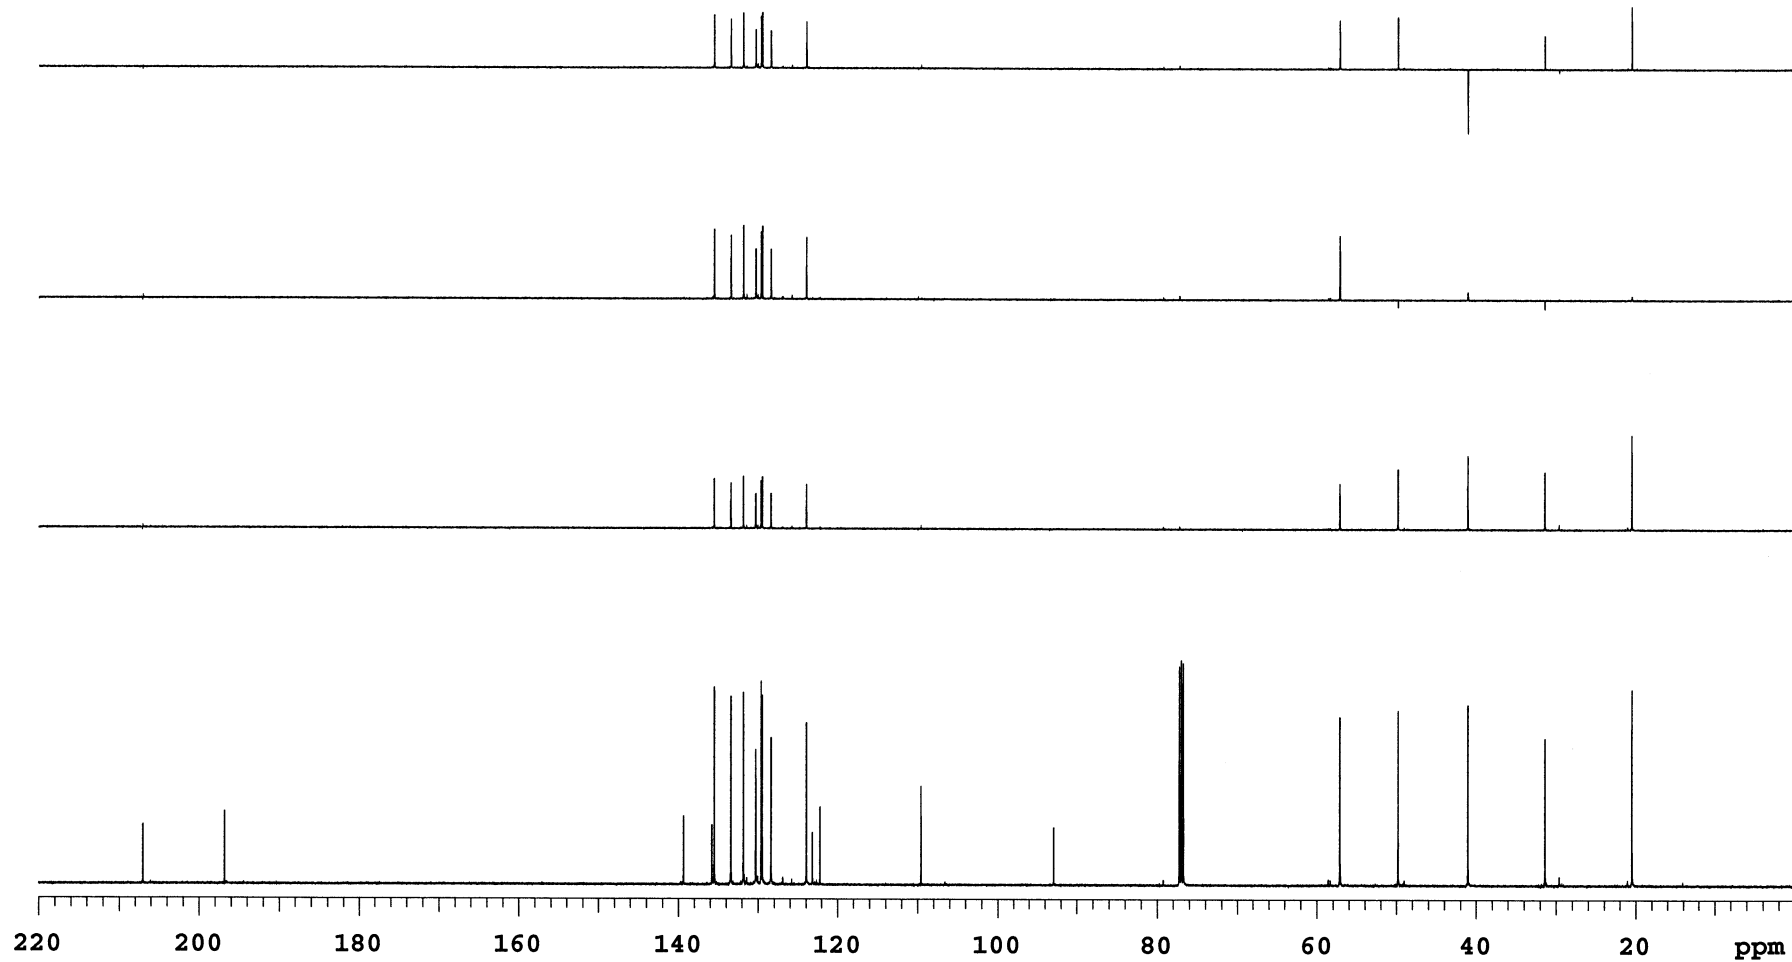

DEPT of compound 2hb

Sample Name IRR-03-077  
Date collected 2024-06-17

Pulse sequence gHSQC  
Solvent cdcl3

Temperature 25  
Spectrometer Agilent-NMR-inova500

Study owner vnmr2  
Operator vnmr2

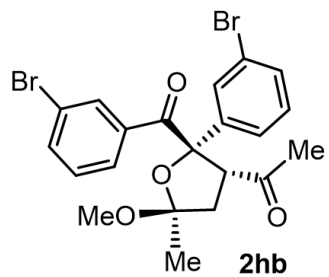

2hb

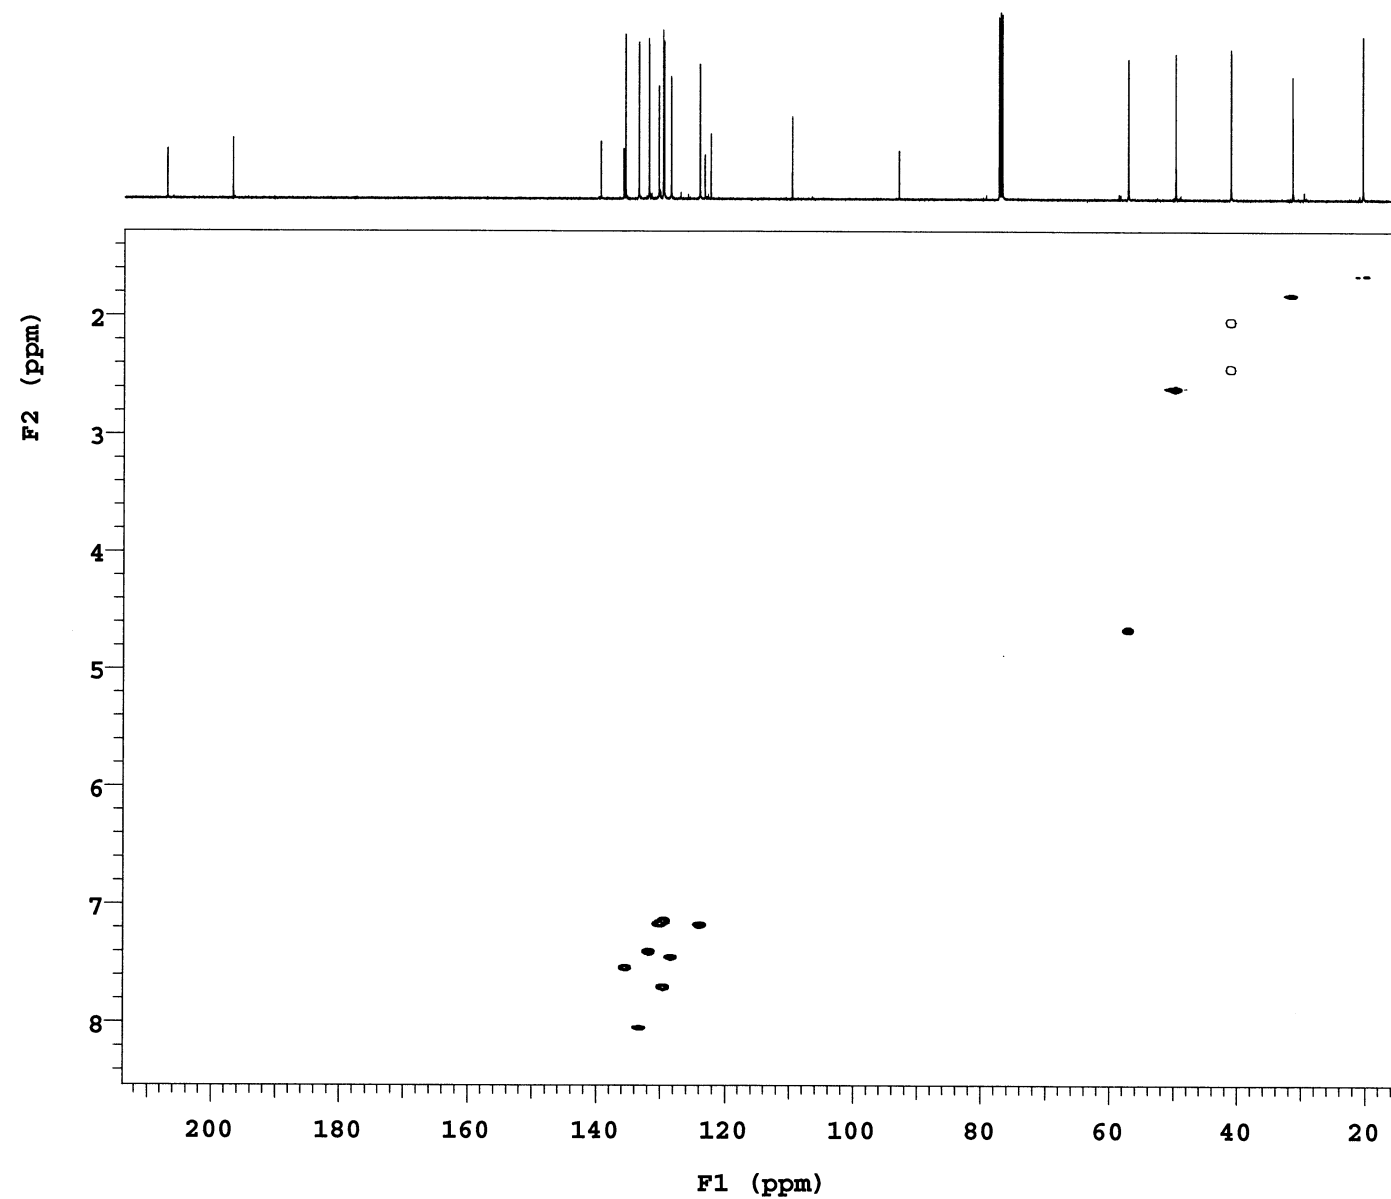

HSQC of compound 2hb



Sample Name **IRR-03-077**  
Date collected **2024-06-17**Pulse sequence **gCOSY**  
Solvent **cdcl3**Temperature **25**  
Spectrometer **Agilent-NMR-inova500**Study owner **vnmr2**  
Operator **vnmr2**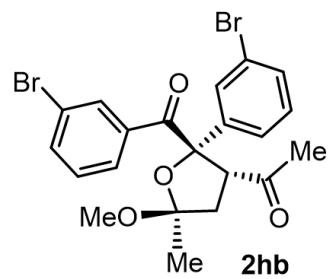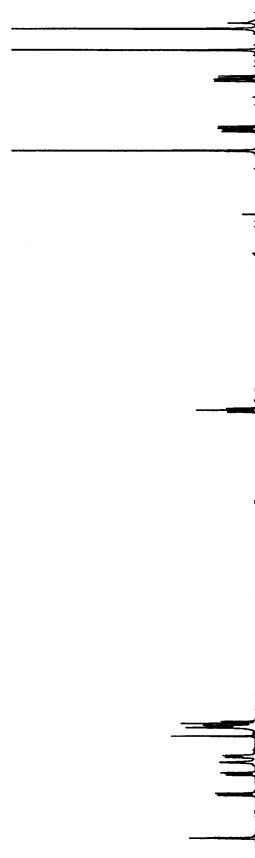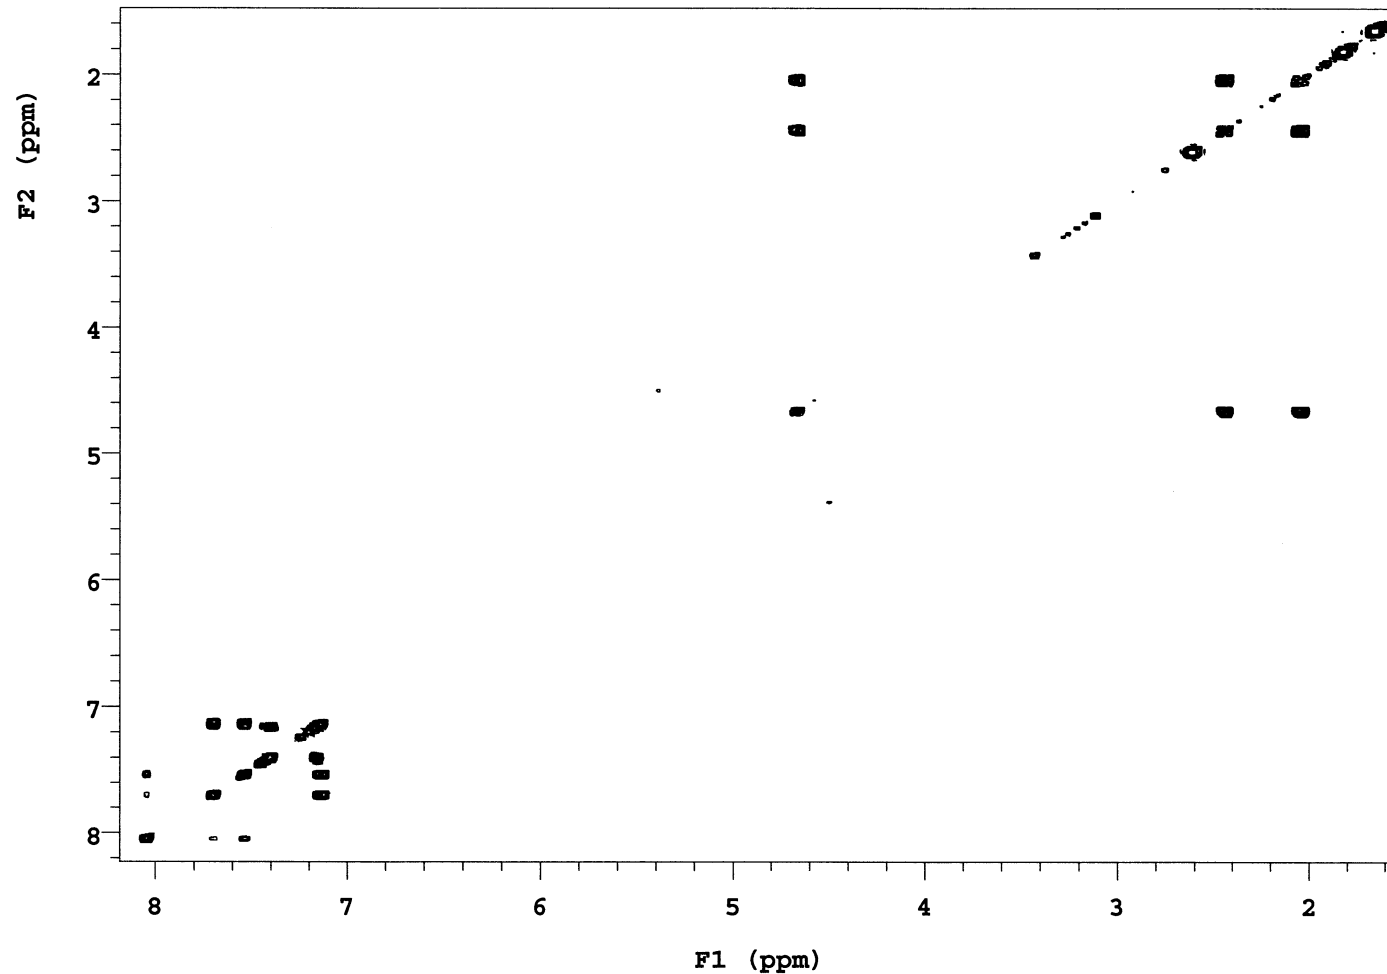

COSY of compound 2hb

Sample Name IRR-03-077  
Date collected 2024-06-17Pulse sequence NOESY  
Solvent cdcl3Temperature 25  
Spectrometer Agilent-NMR-inova500Study owner vnmr2  
Operator vnmr2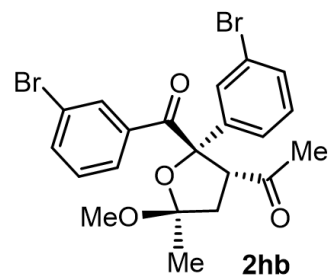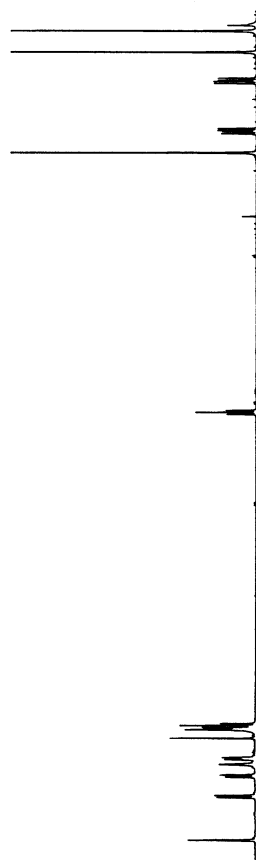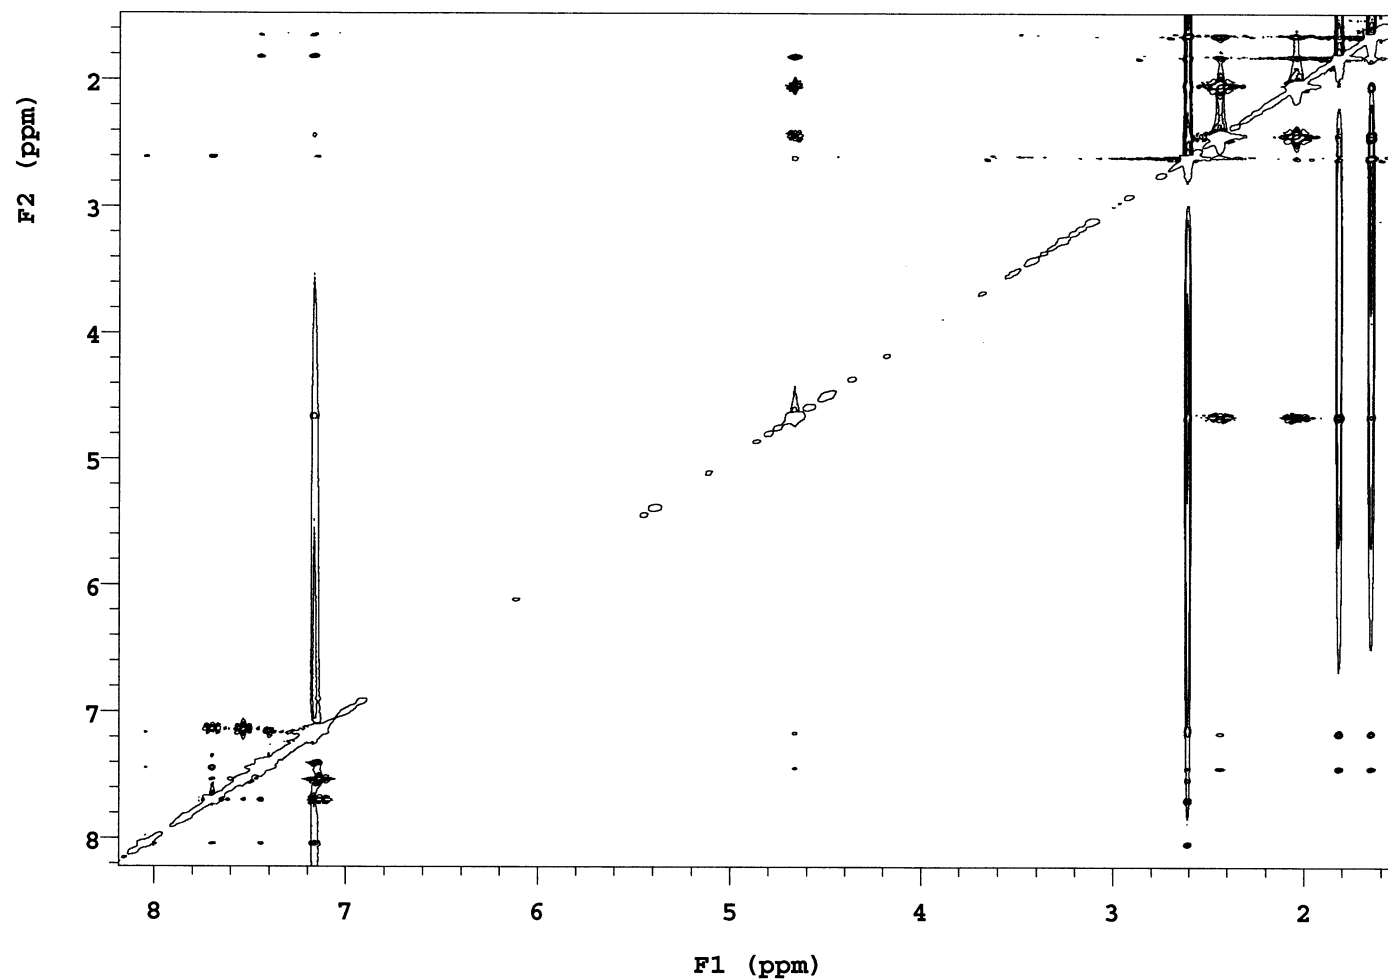

NOESY of compound 2hb

IRR-03-085

Sample Name IRR-03-085  
Date collected 2024-06-21Pulse sequence PROTON  
Solvent cdcl3Temperature 25  
Spectrometer Agilent-NMR-inova500Study owner vnmr2  
Operator vnmr2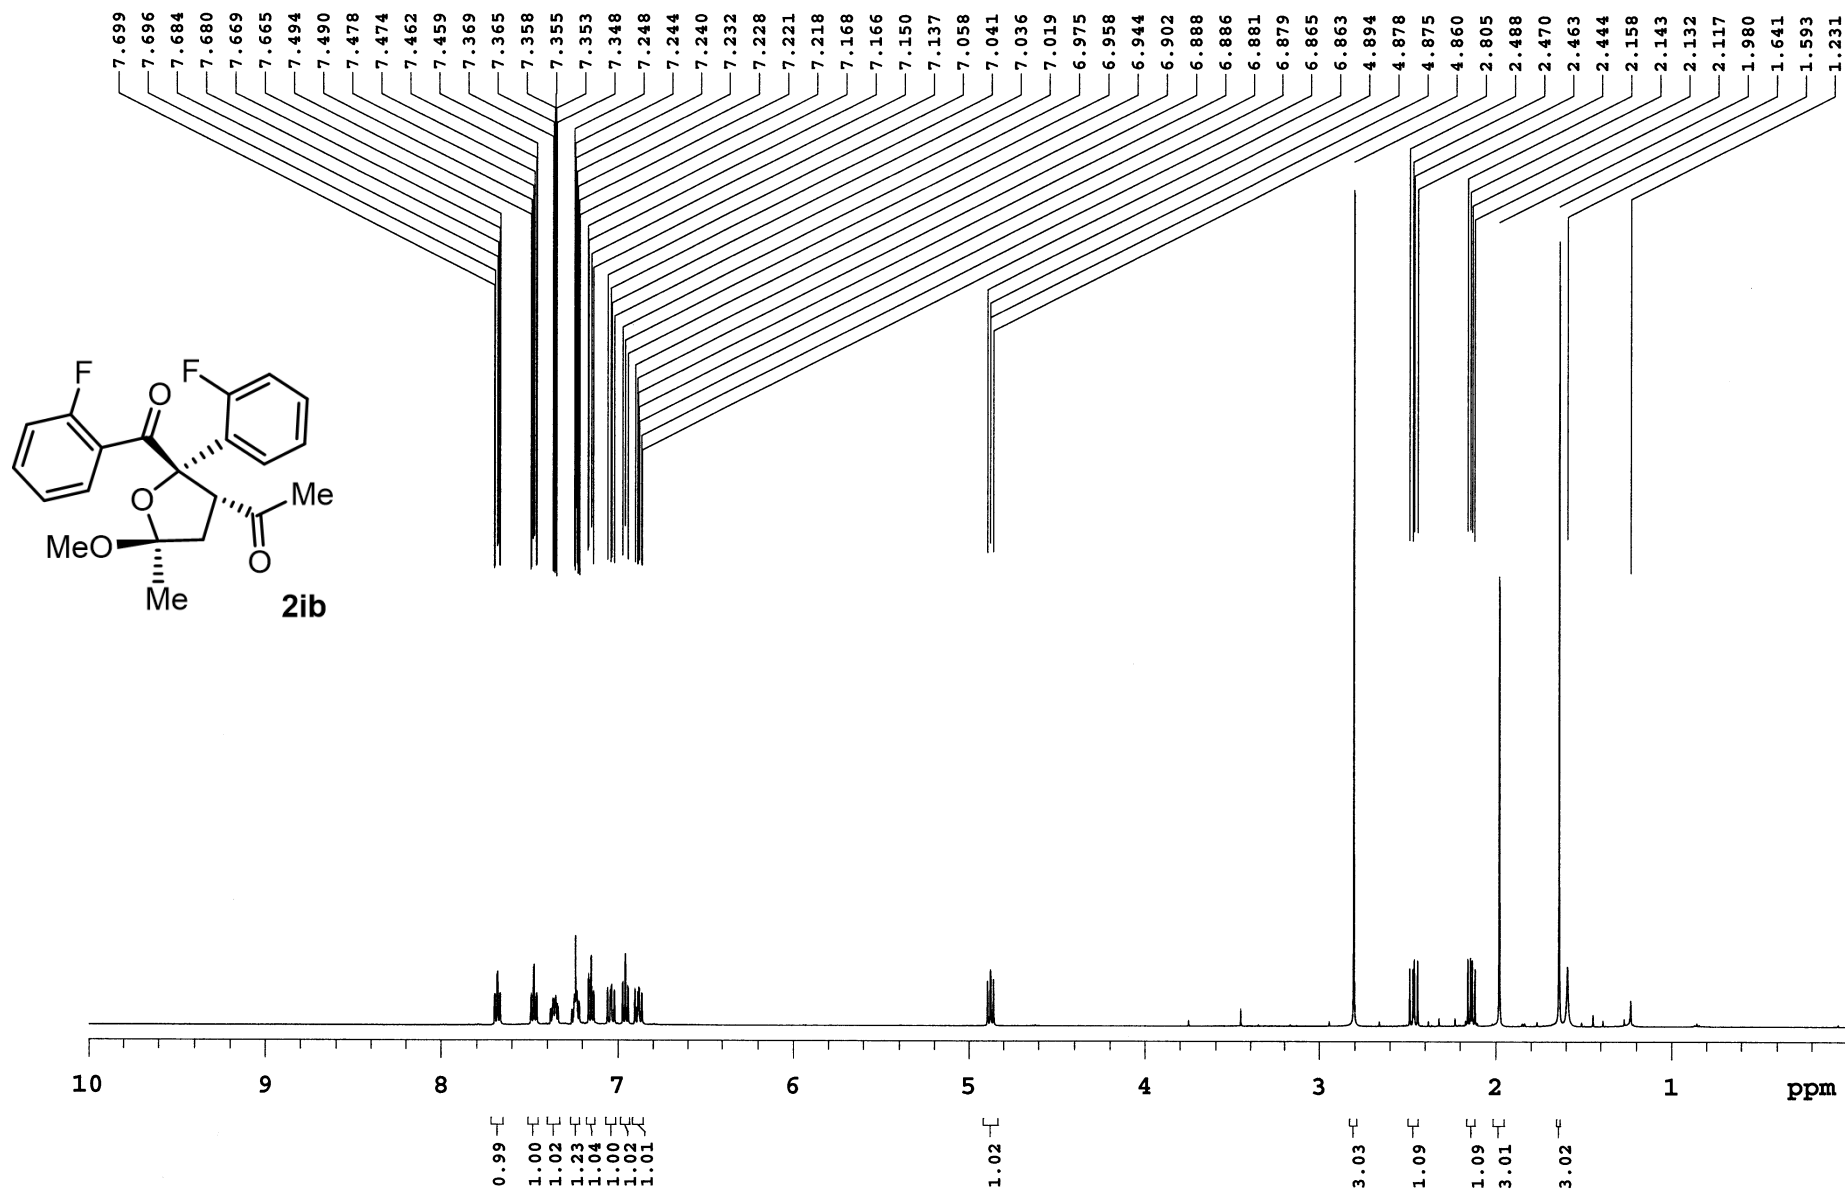

Sample Name IRR-03-085  
Date collected 2024-06-21Pulse sequence CARBON  
Solvent cdcl3Temperature 25  
Spectrometer Agilent-NMR-inova500Study owner vnmr2  
Operator vnmr2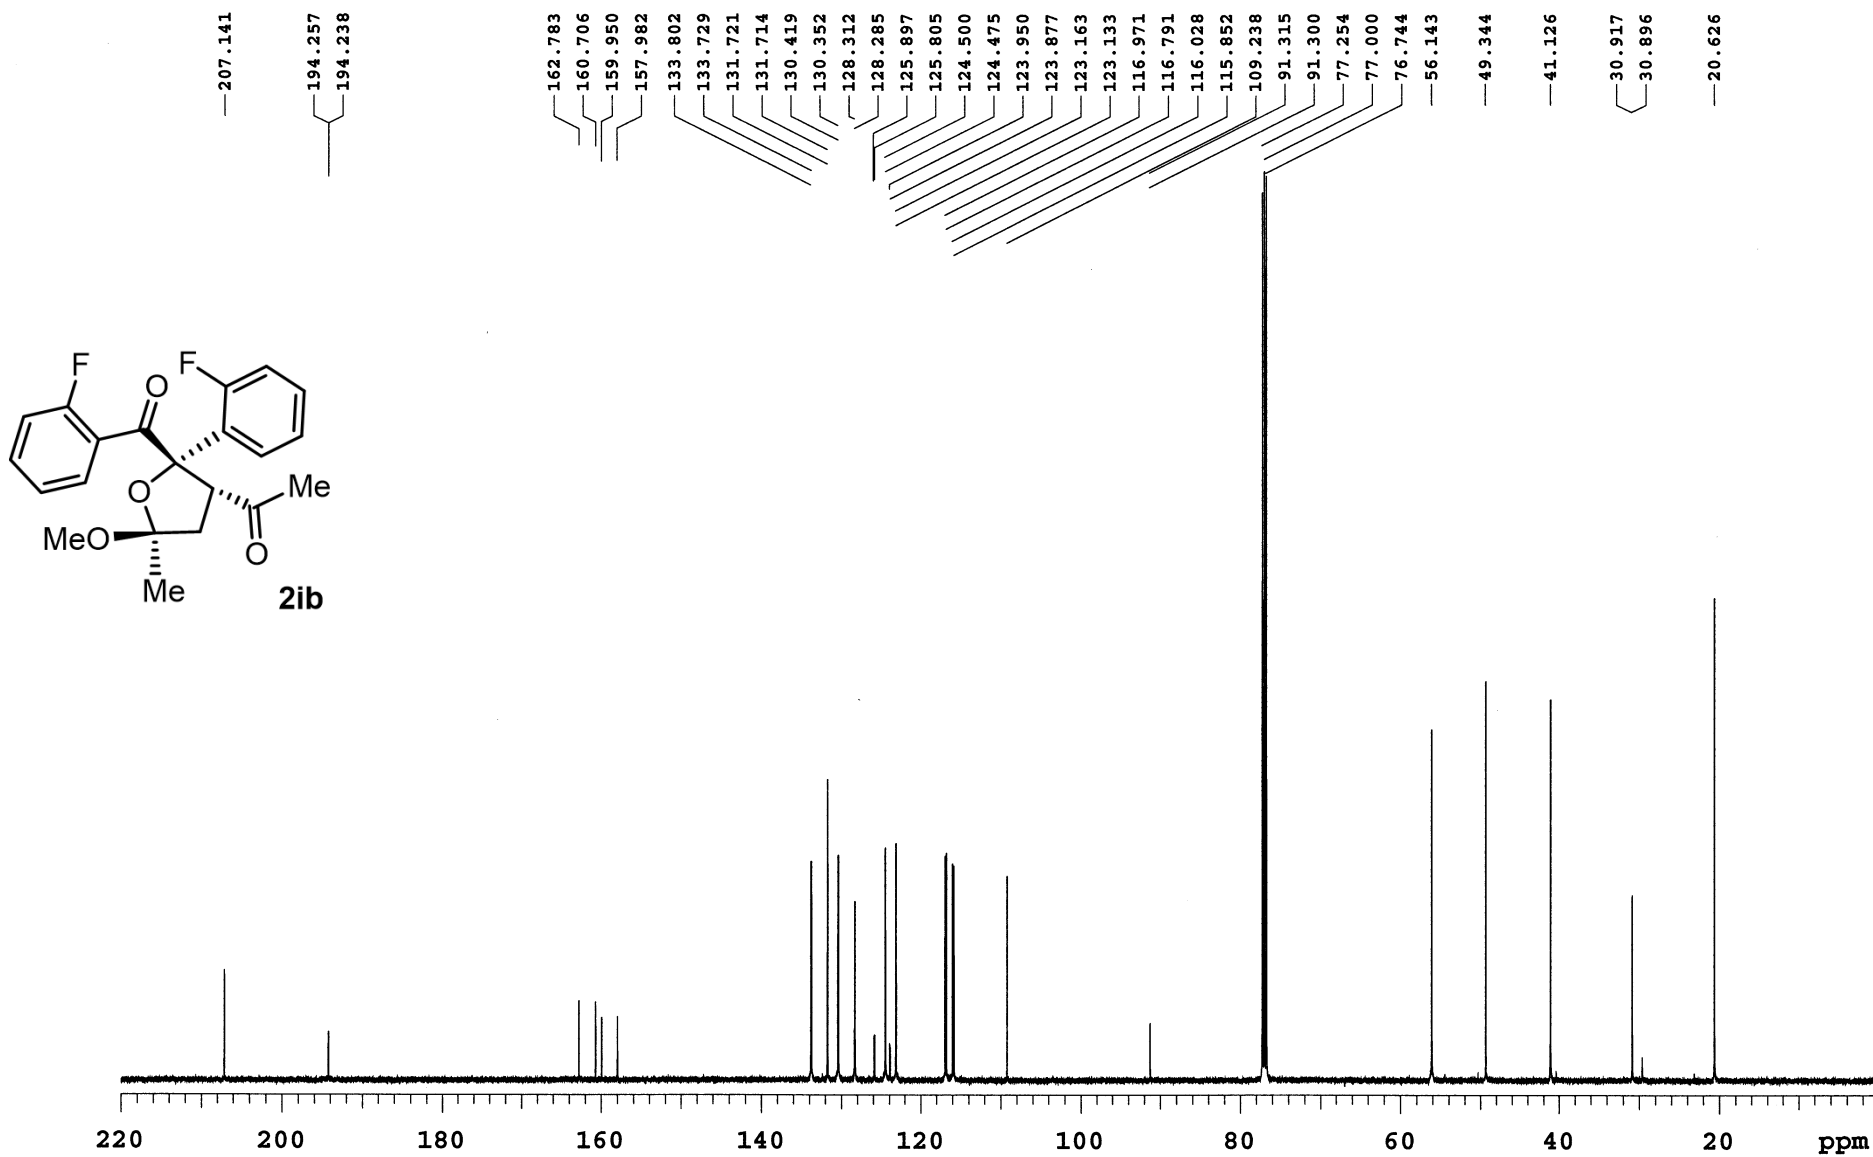

$^{13}\text{C}$  NMR (125 MHz,  $\text{CDCl}_3$ ) of compound 2ib

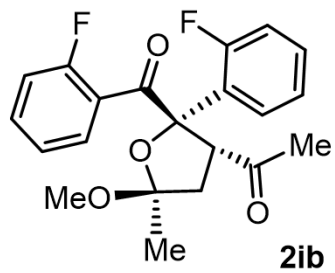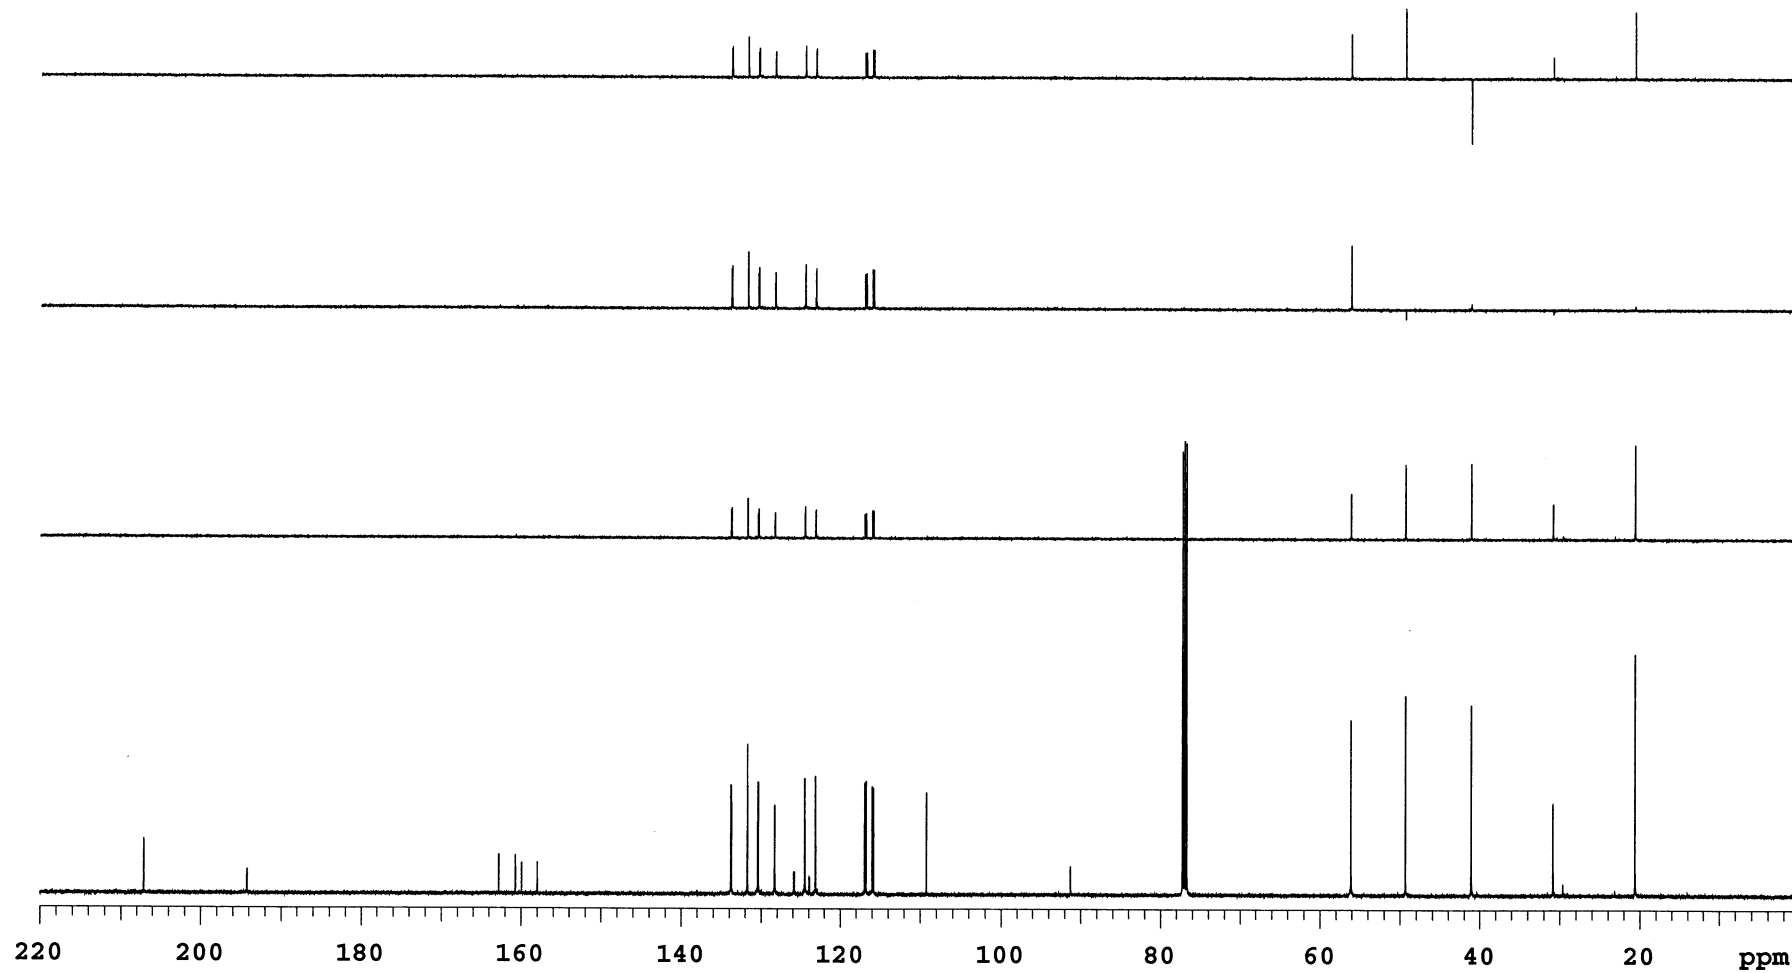

Sample Name IRR-03-085  
Date collected 2024-06-22Pulse sequence gHSQC  
Solvent cdcl3Temperature 25  
Spectrometer Agilent-NMR-inova500Study owner vnmr2  
Operator vnmr2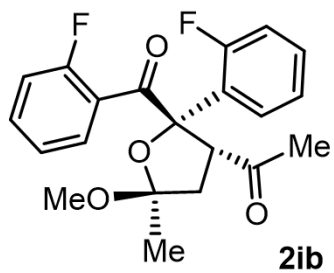

2ib

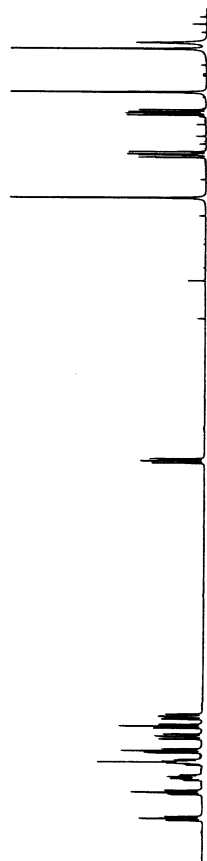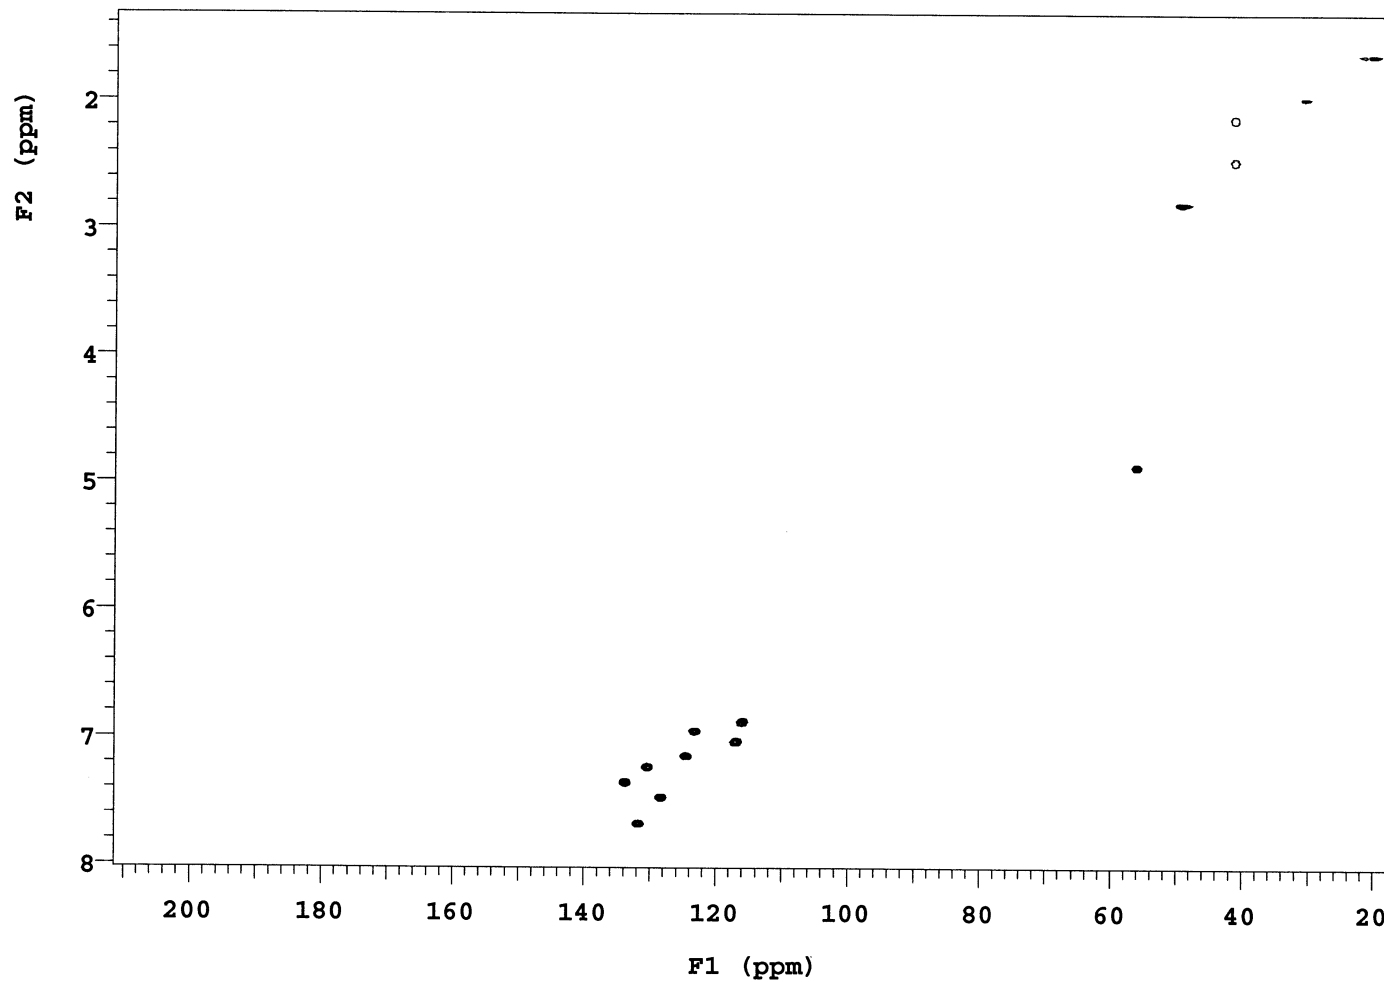

HSQC of compound 2ib

Sample Name IRR-03-085  
Date collected 2024-06-22

Pulse sequence gCOSY  
Solvent cdcl3

Temperature 25  
Spectrometer Agilent-NMR-inova500

Study owner vnmr2  
Operator vnmr2

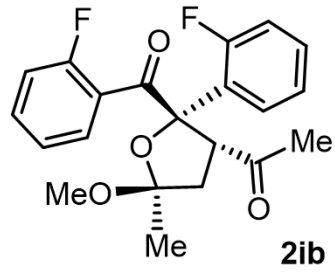

2ib

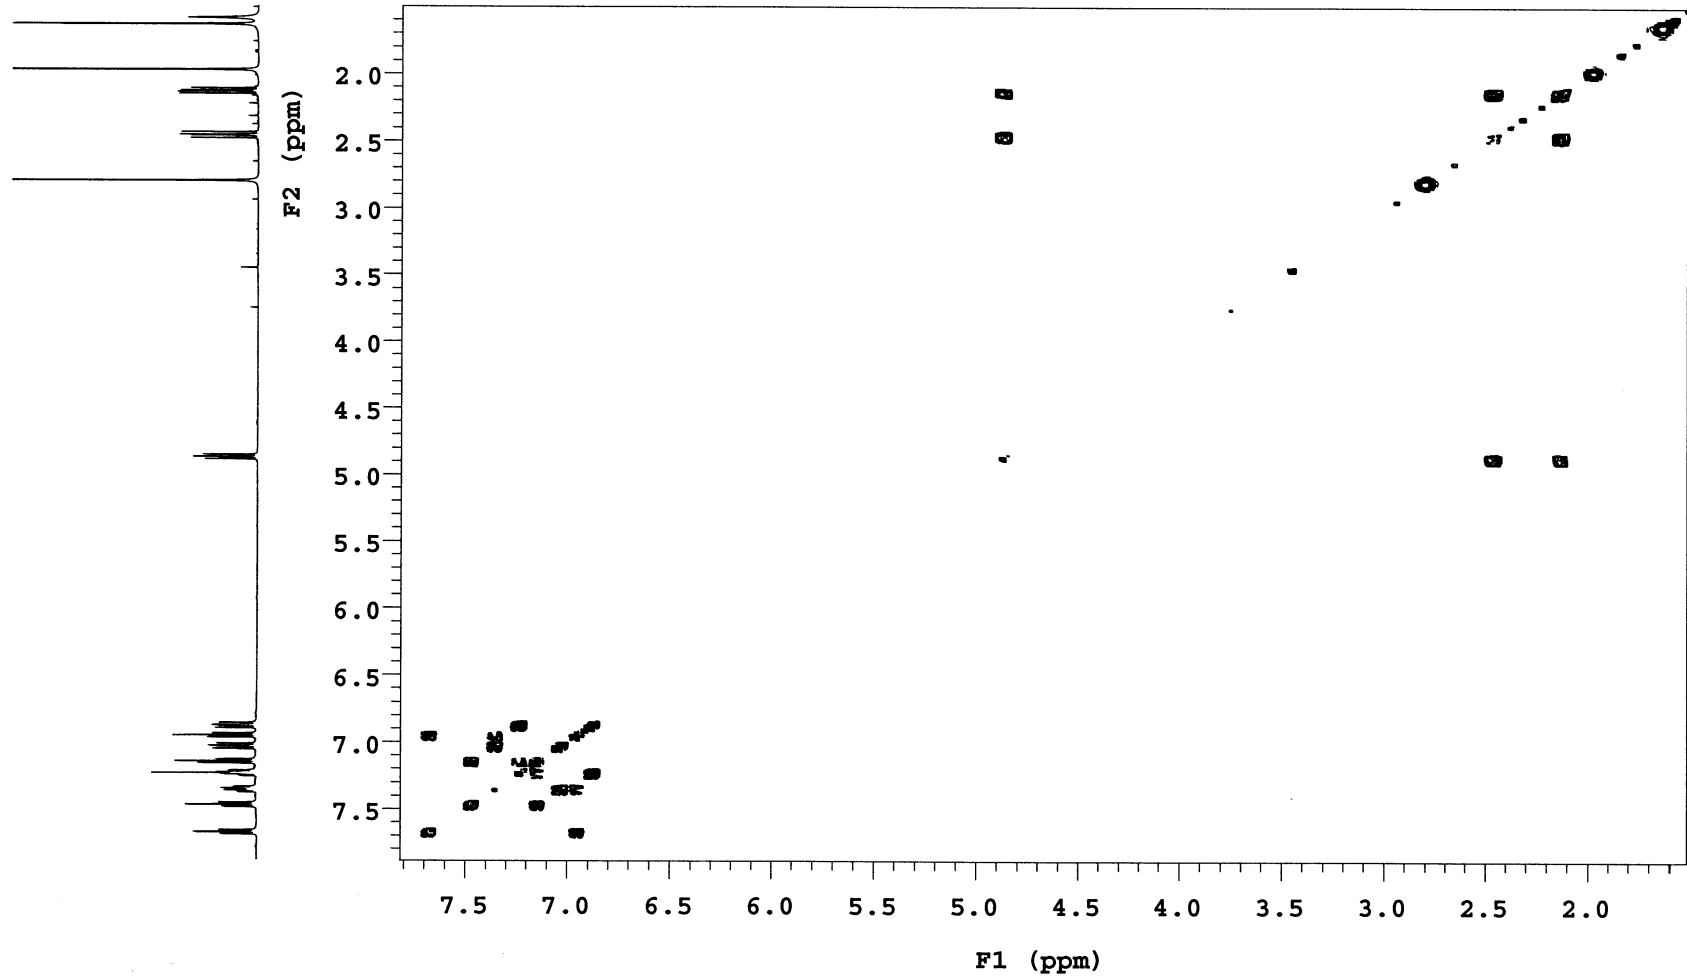

COSY of compound 2ib

IRR-03-085

Sample Name IRR-03-085  
Date collected 2024-06-22Pulse sequence NOESY  
Solvent cdcl3Temperature 25  
Spectrometer Agilent-NMR-inova500Study owner vnmr2  
Operator vnmr2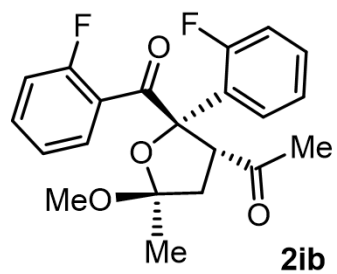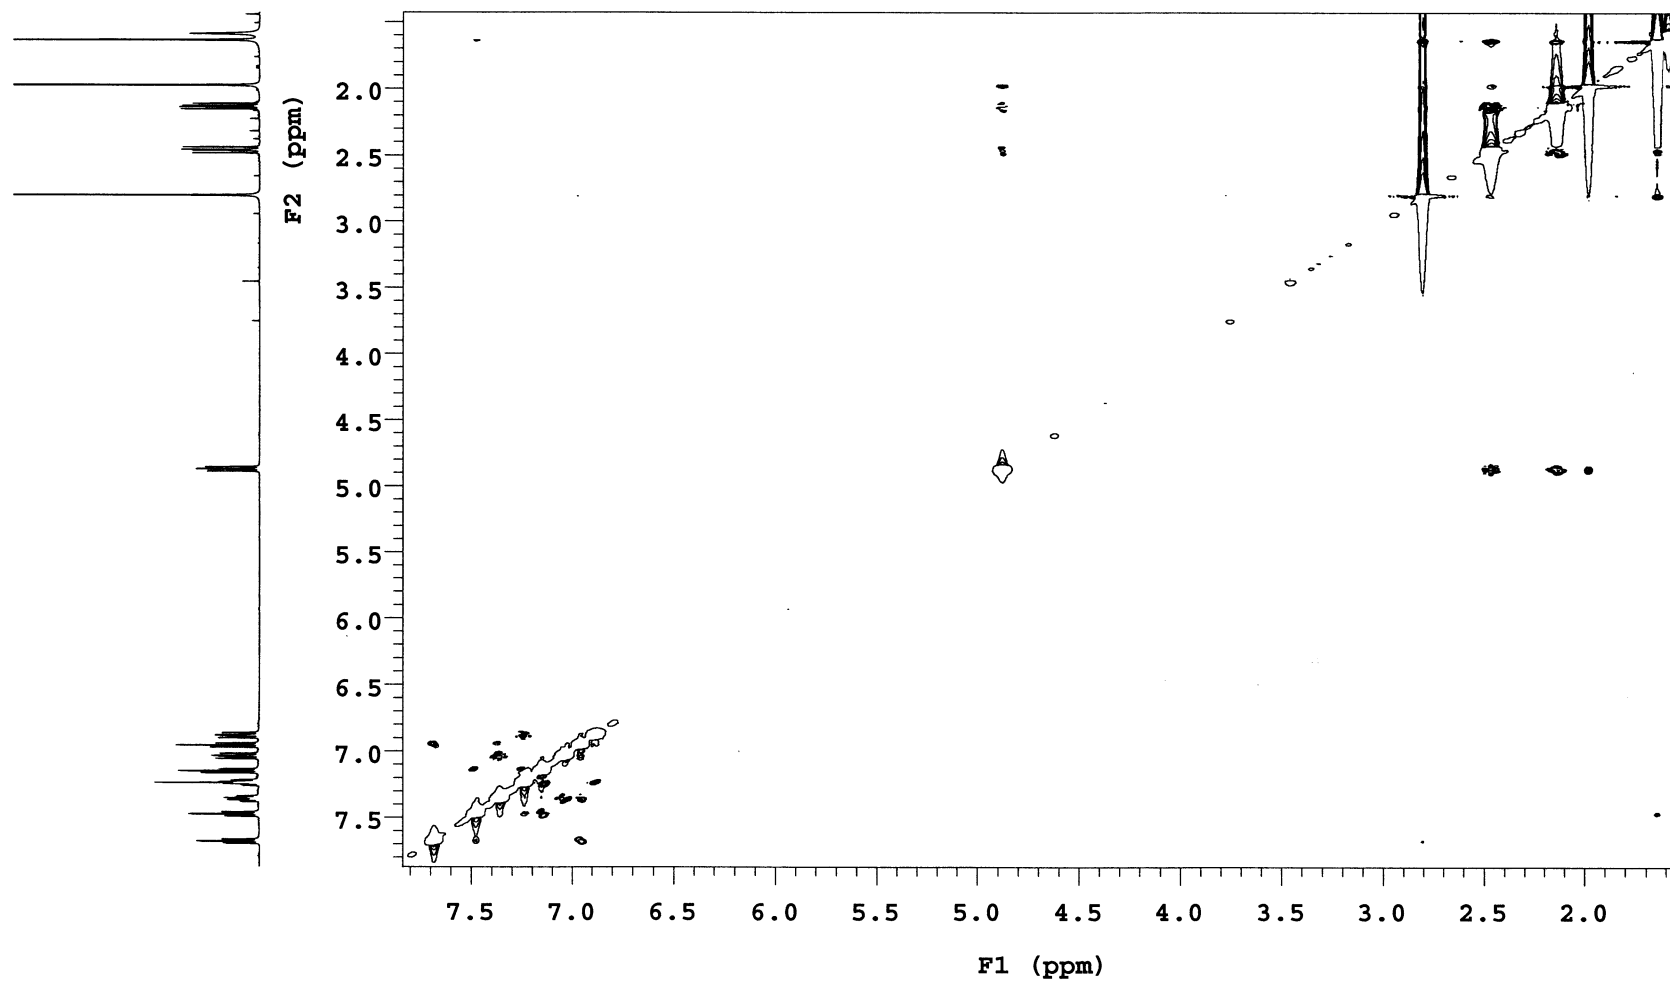

NOESY of compound 2ib



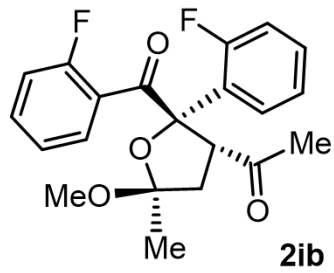

---109.354  
---109.365  
---109.379  
---109.852

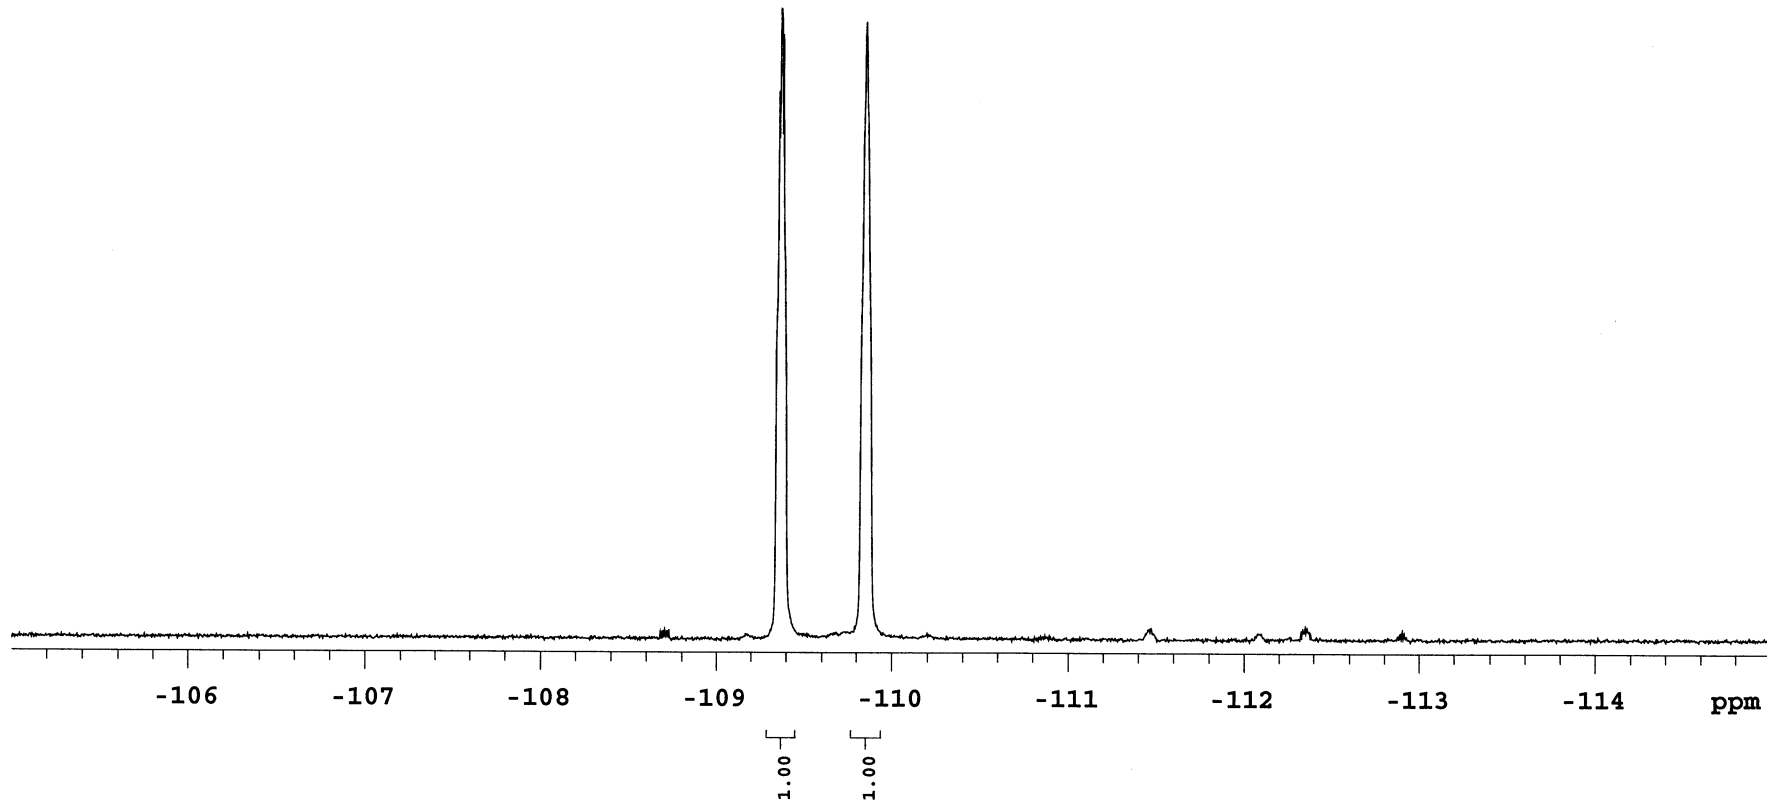

Sample Name IRR-03-086  
Date collected 2024-06-20

Pulse sequence PROTON  
Solvent cdcl3

Temperature 25  
Spectrometer Agilent-NMR-inova500

Study owner vnmr2  
Operator vnmr2

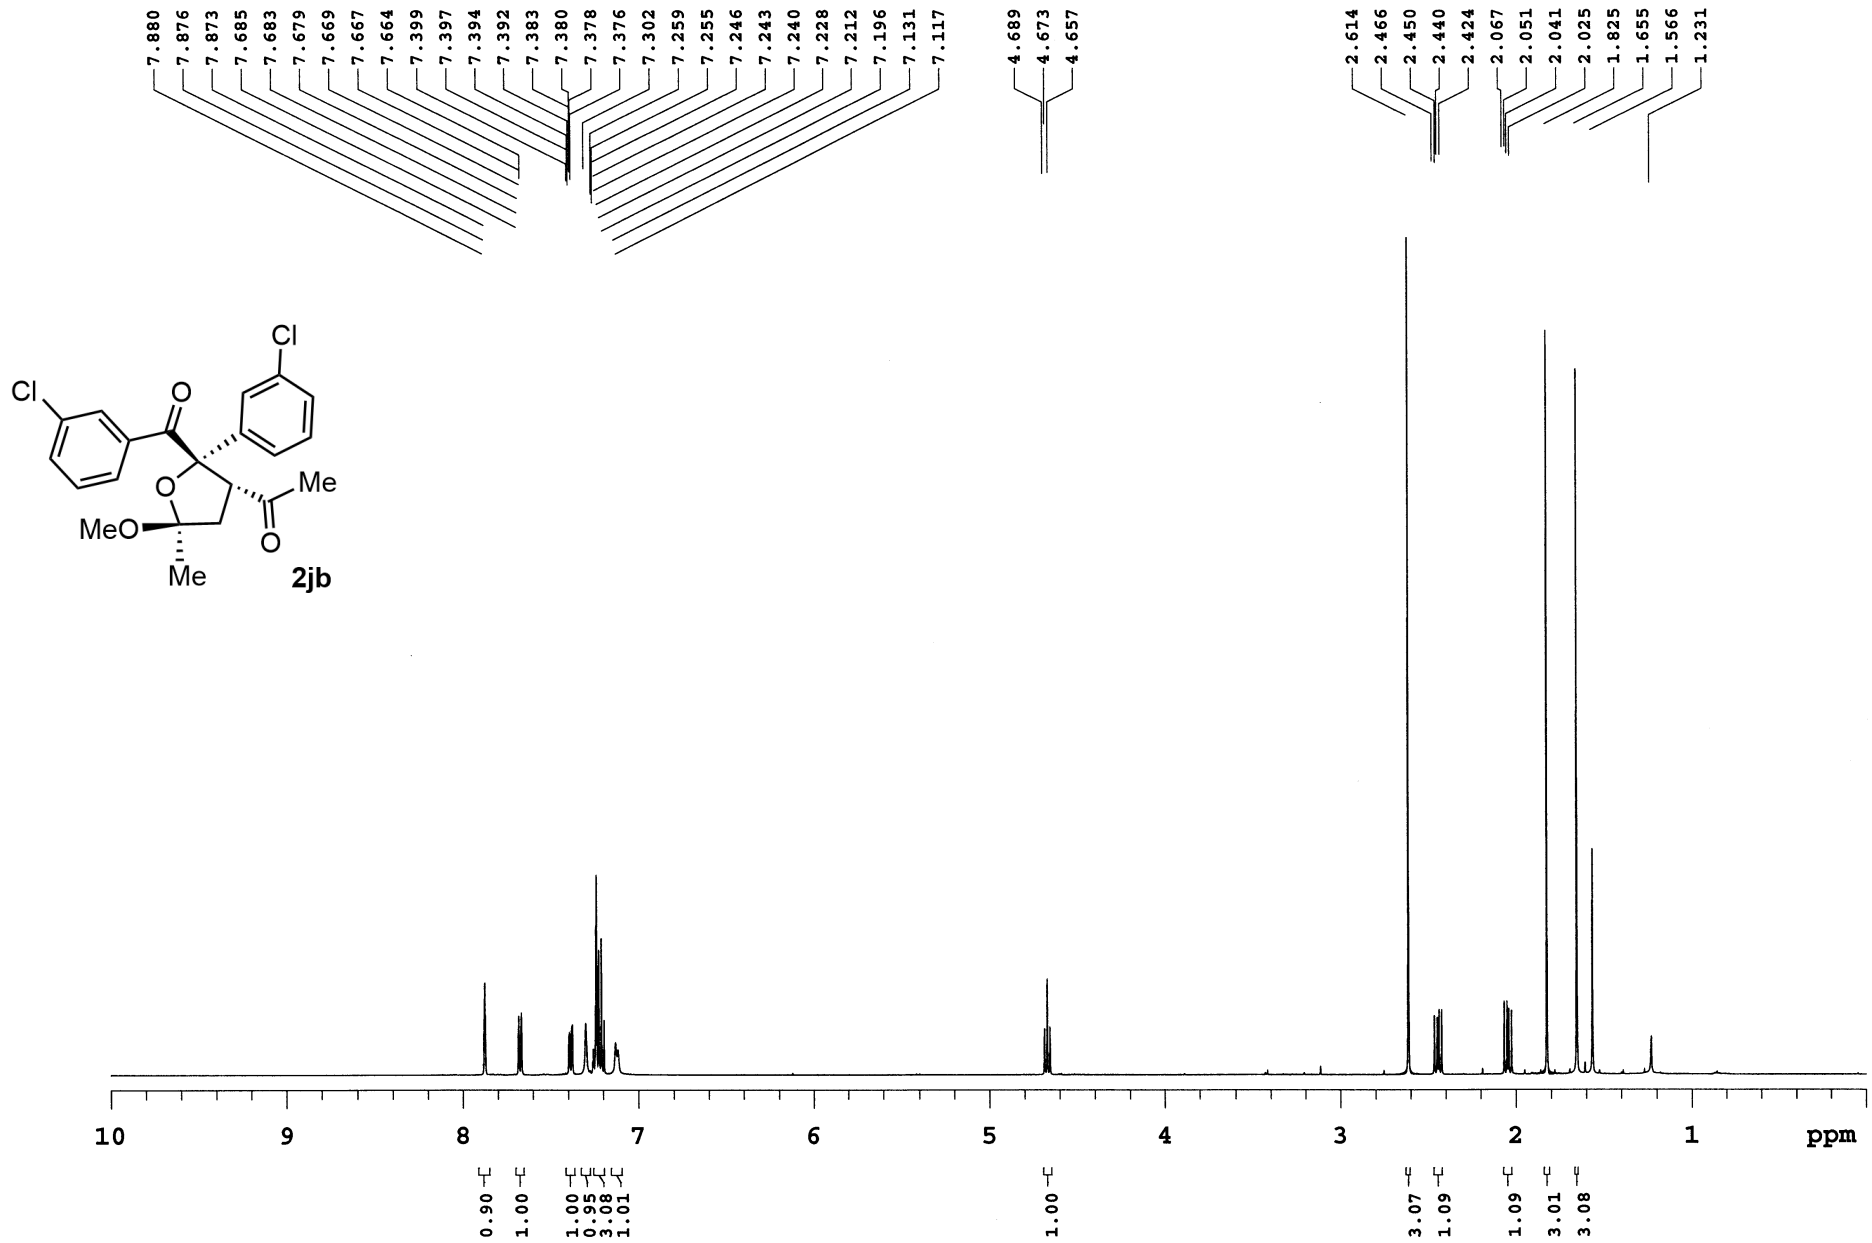

Sample Name IRR-03-086  
Date collected 2024-06-20Pulse sequence CARBON  
Solvent cdcl3Temperature 25  
Spectrometer Agilent-NMR-inova500Study owner vnmr2  
Operator vnmr2

207.095

197.002

139.217  
135.648  
135.081  
134.260  
132.620  
130.536  
130.049  
129.243  
129.154  
128.904  
125.574  
123.503  
109.591

93.048

77.254  
77.000  
76.746

57.161

49.798

41.087

31.451

20.500

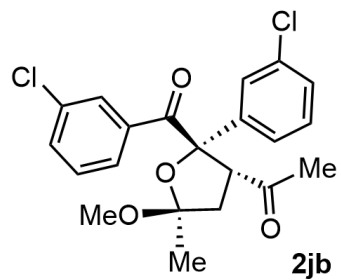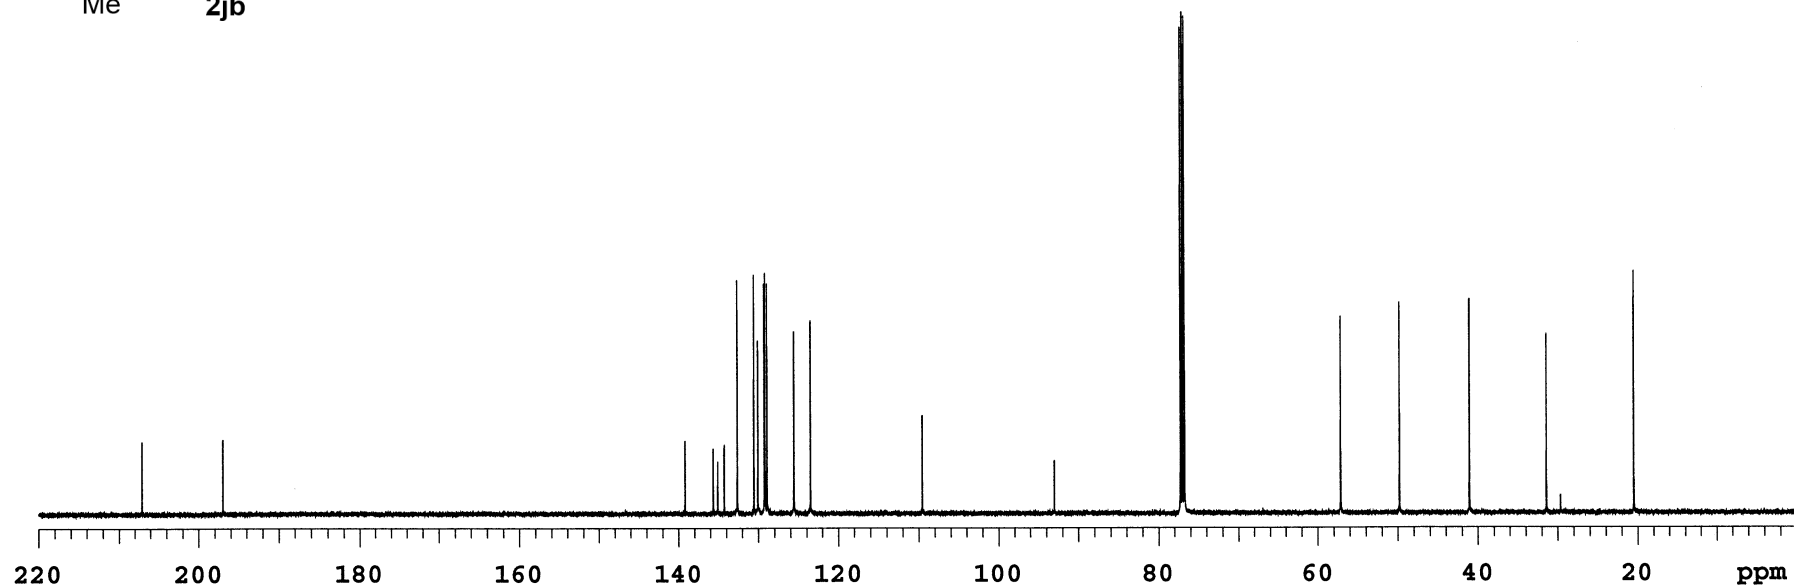13C NMR (125 MHz, CDCl<sub>3</sub>) of compound 2jb

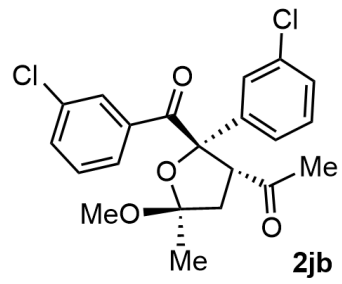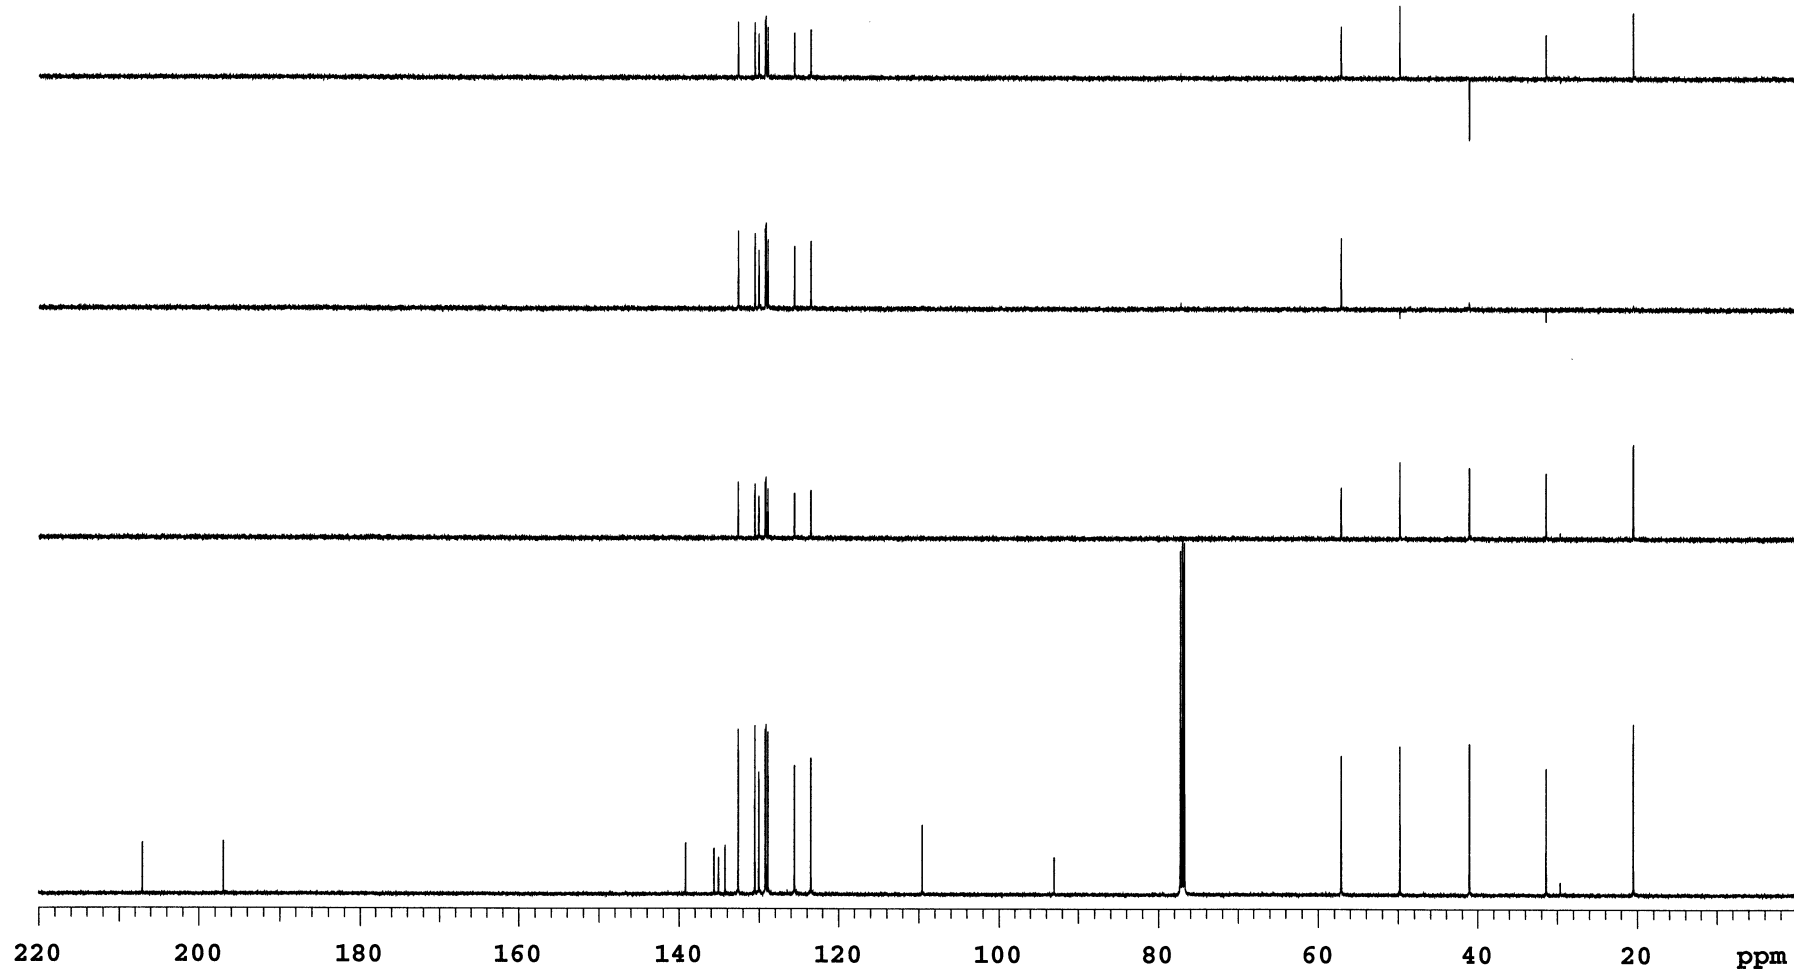

DEPT of compound 2jb

Sample Name IRR-03-086  
Date collected 2024-06-21

Pulse sequence gHSQC  
Solvent cdcl3

Temperature 25  
Spectrometer Agilent-NMR-inova500

Study owner vnmr2  
Operator vnmr2

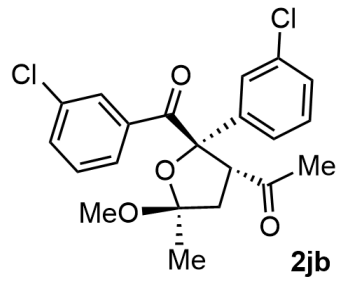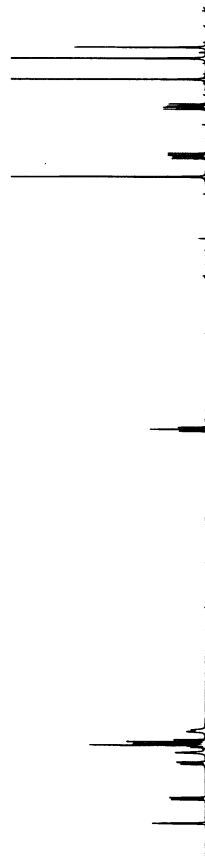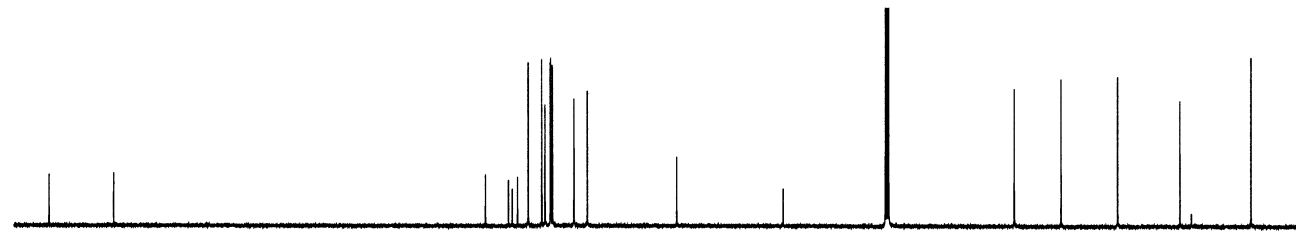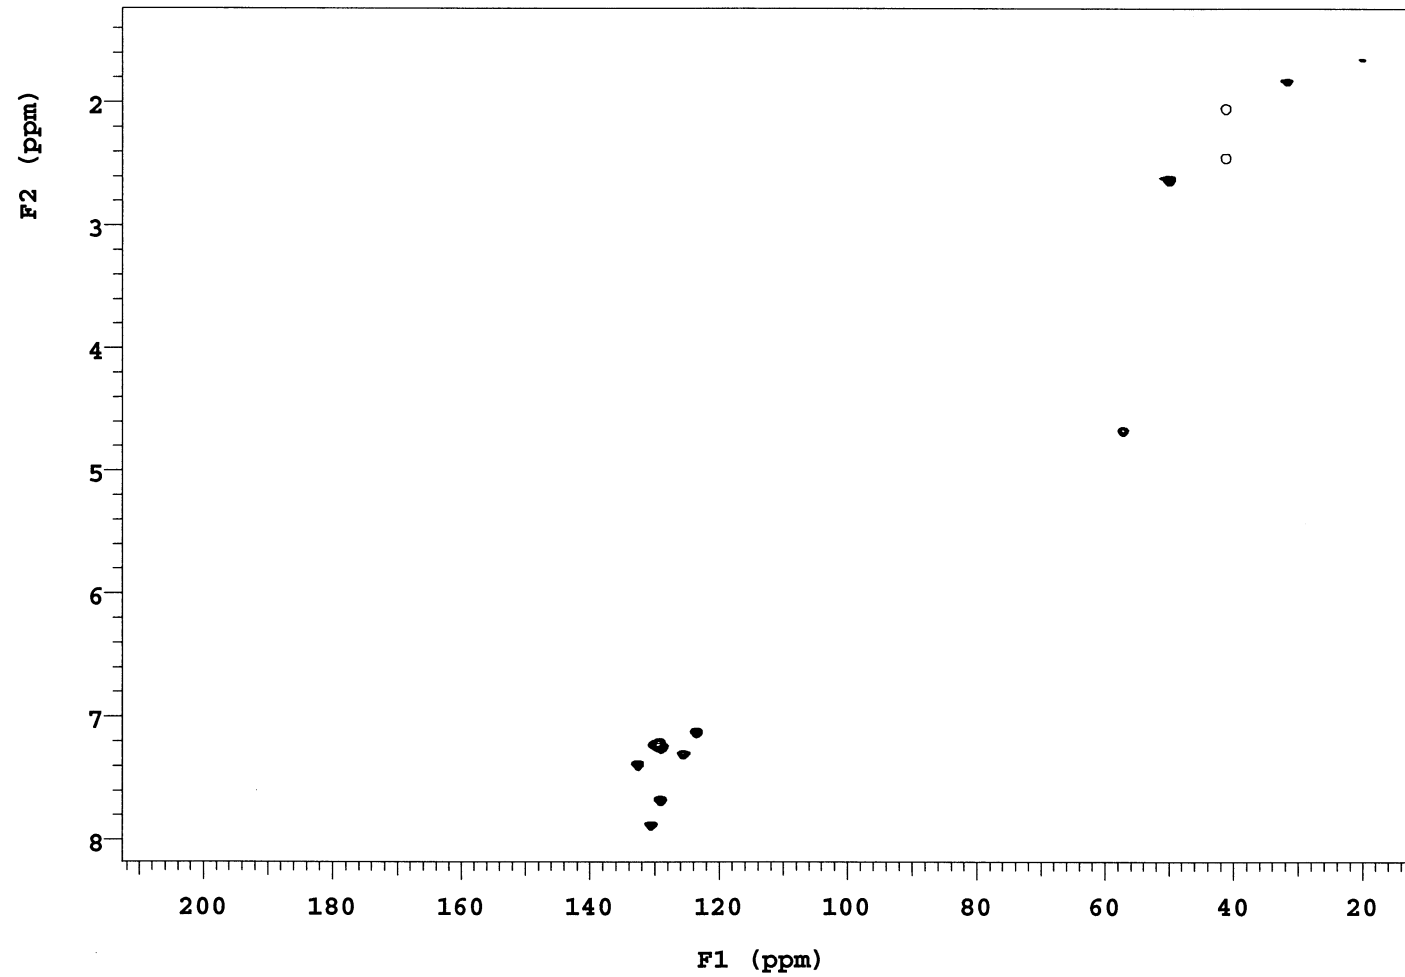

HSQC of compound 2jb

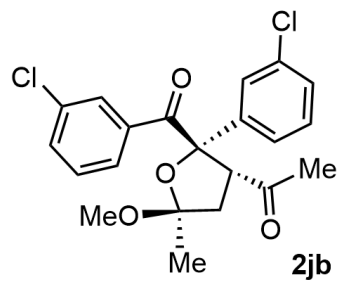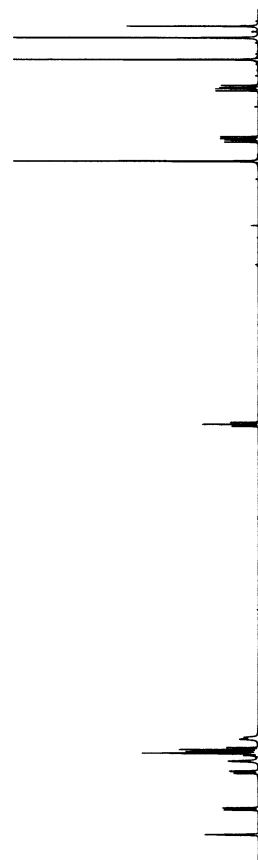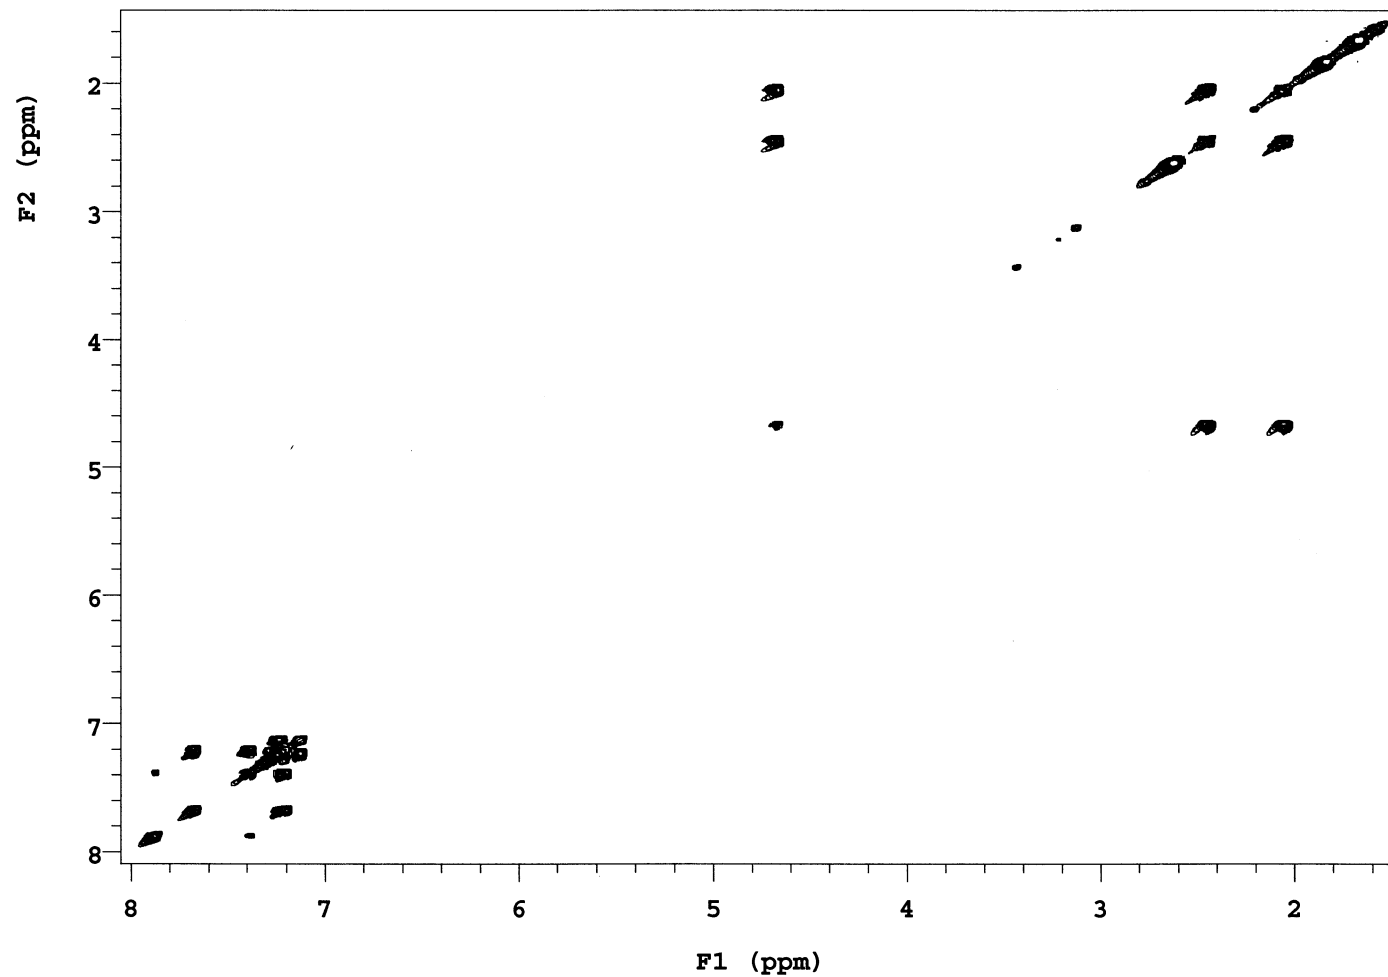

COSY of compound 2jb

Sample Name IRR-03-086  
Date collected 2024-06-21

Pulse sequence NOESY  
Solvent cdcl3

Temperature 25  
Spectrometer Agilent-NMR-inova500

Study owner vnmr2  
Operator vnmr2

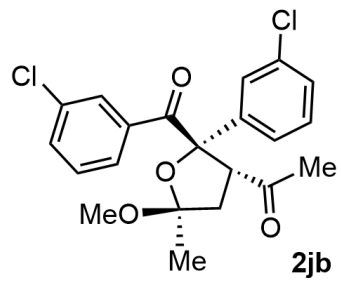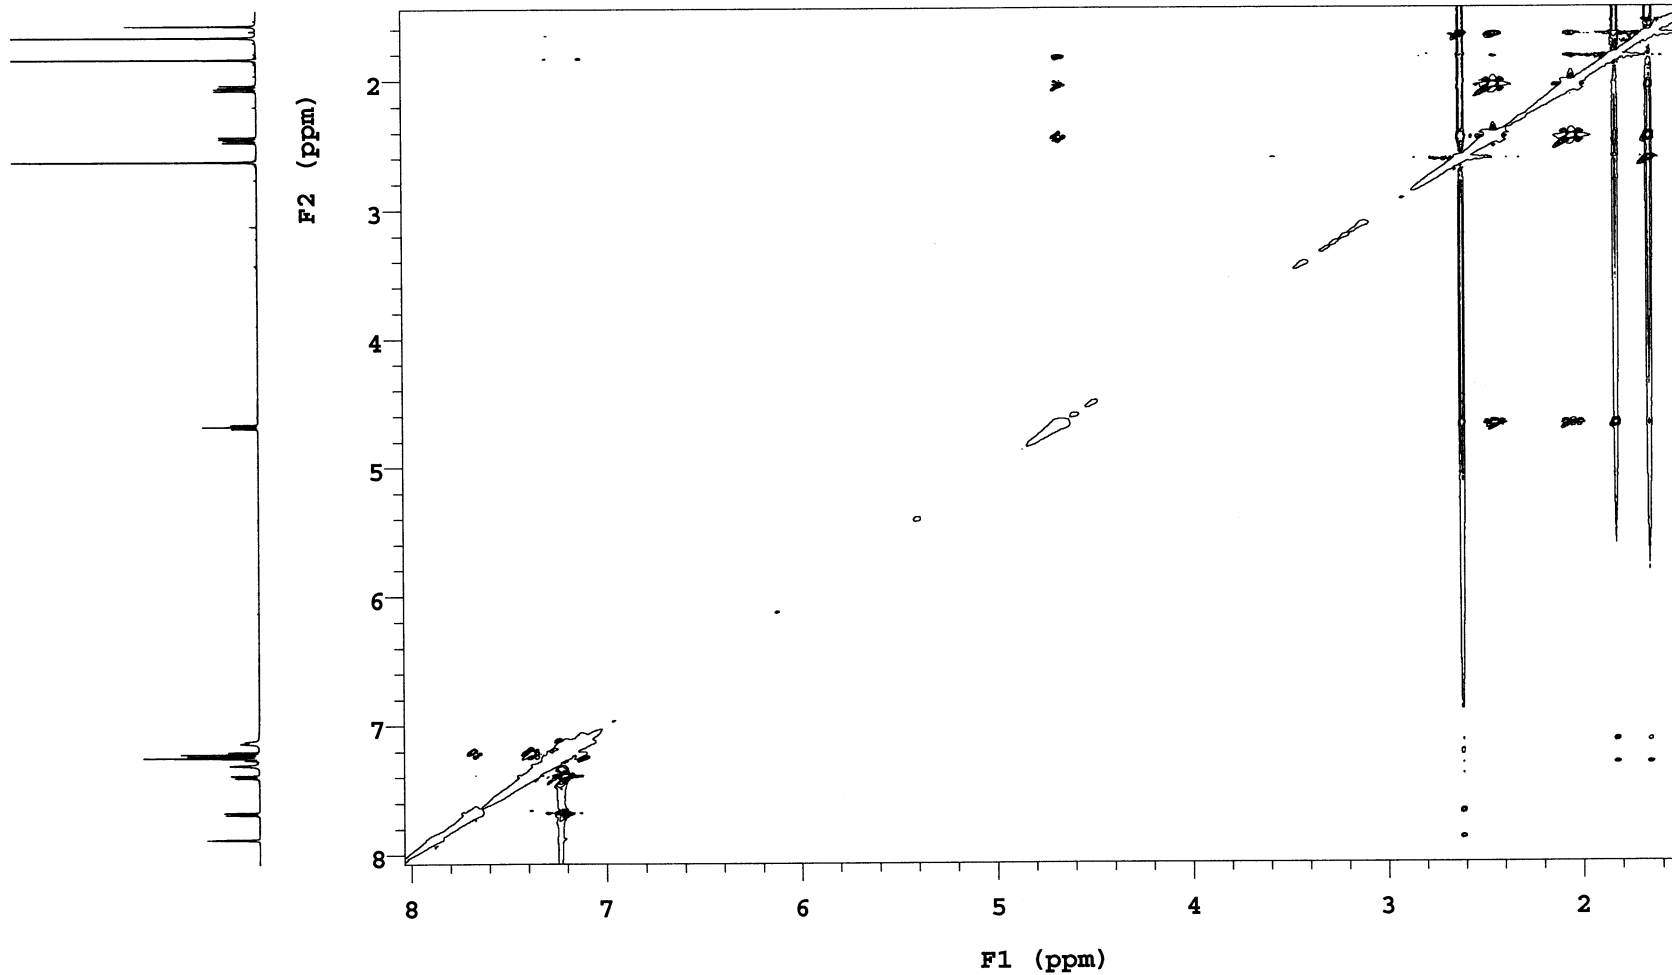

NOESY of compound 2jb

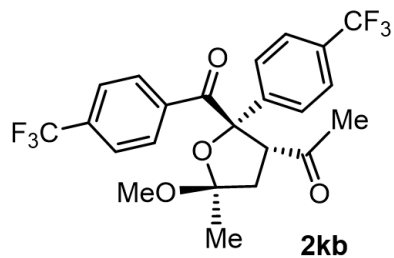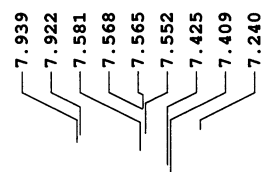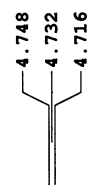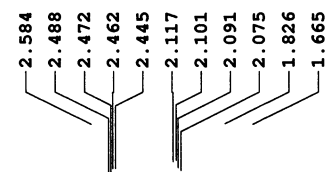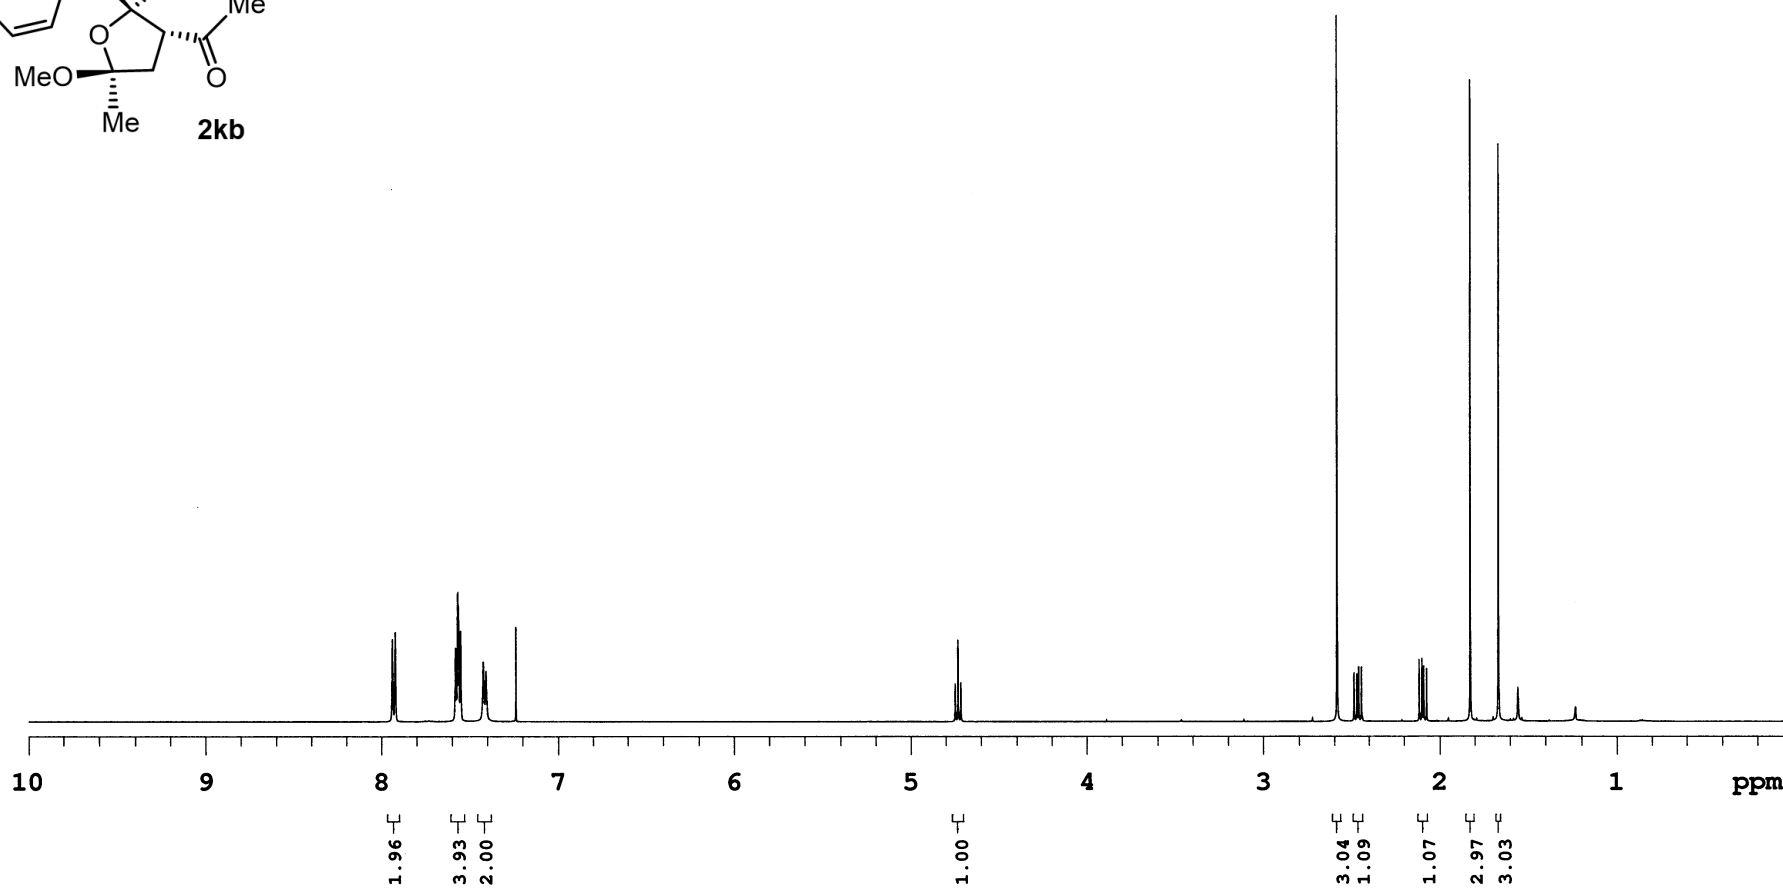



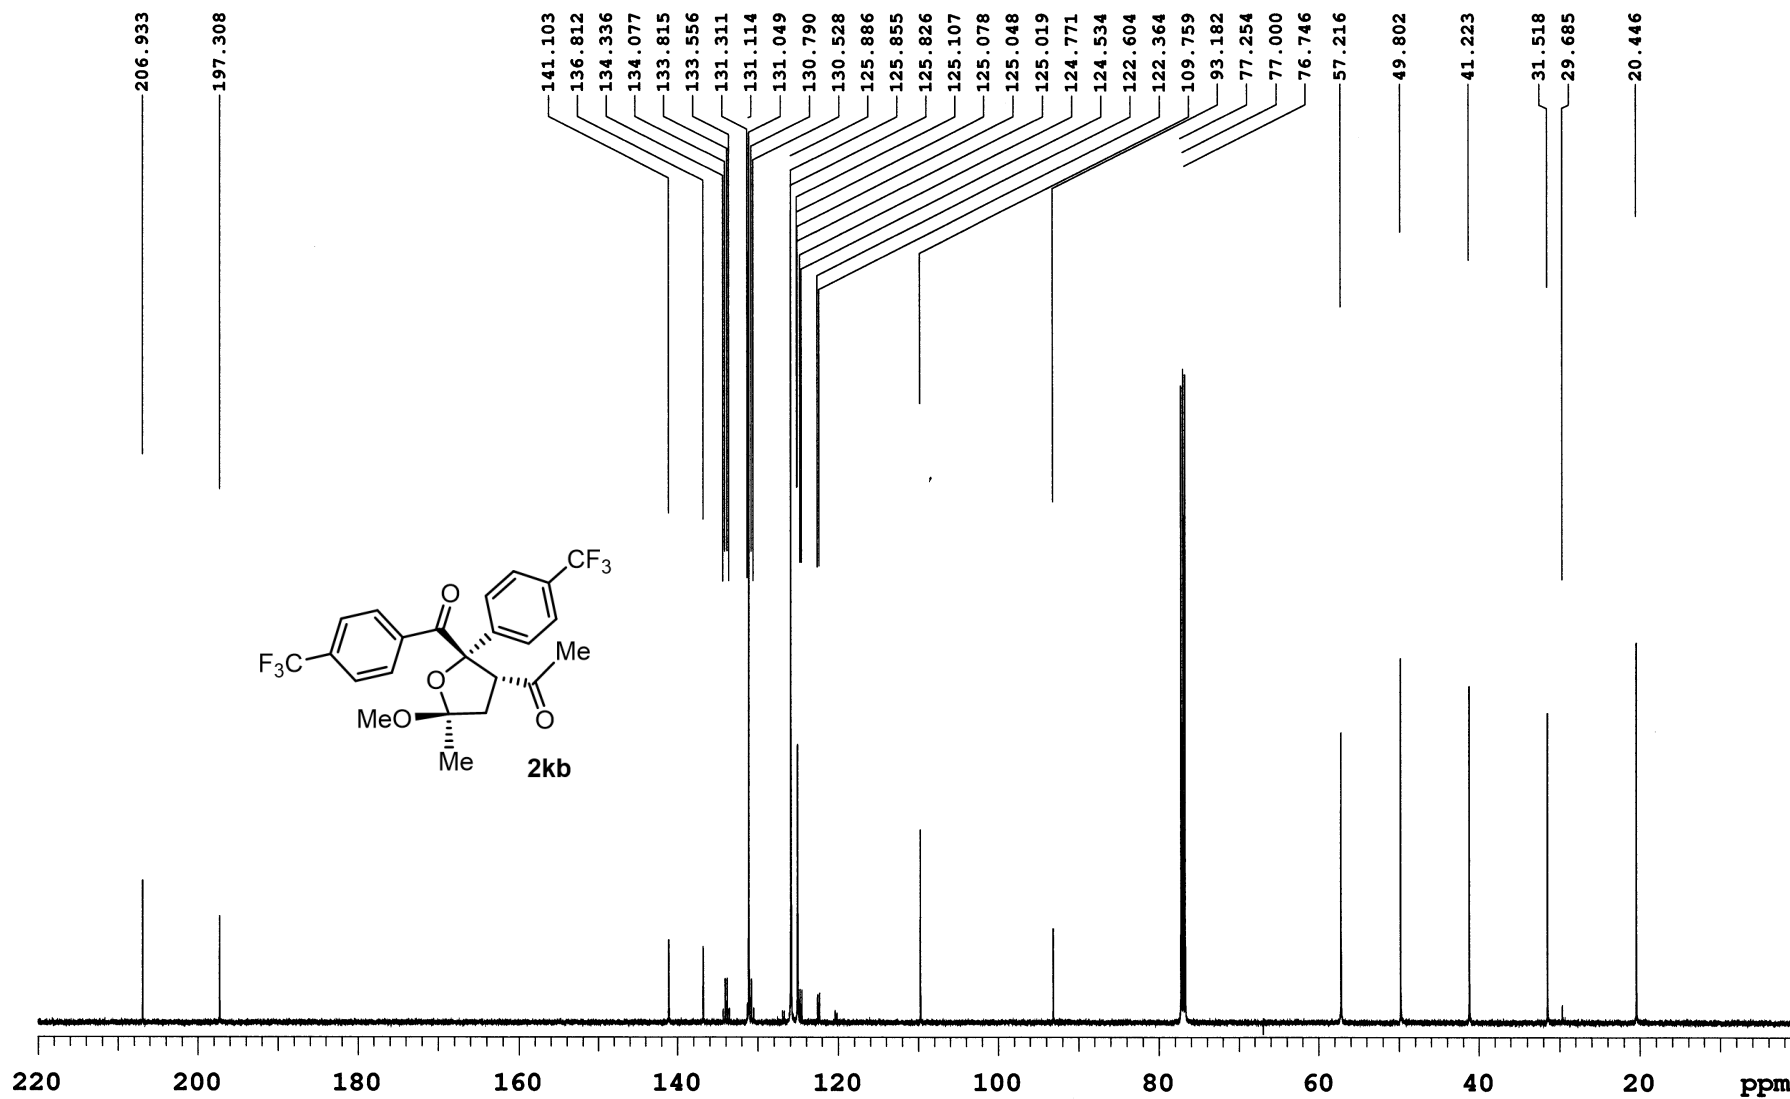13C NMR (125 MHz, CDCl<sub>3</sub>) of compound 2kb

IRR-03-021

Sample Name **IRR-03-021**  
Date collected **2024-03-08**

Pulse sequence **DEPT**  
Solvent **cdcl3**

Temperature **25**  
Spectrometer **Agilent-NMR-inova500**

Study owner **vnmr2**  
Operator **vnmr2**

S130

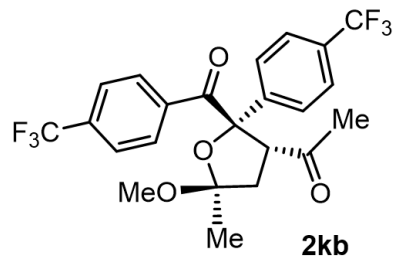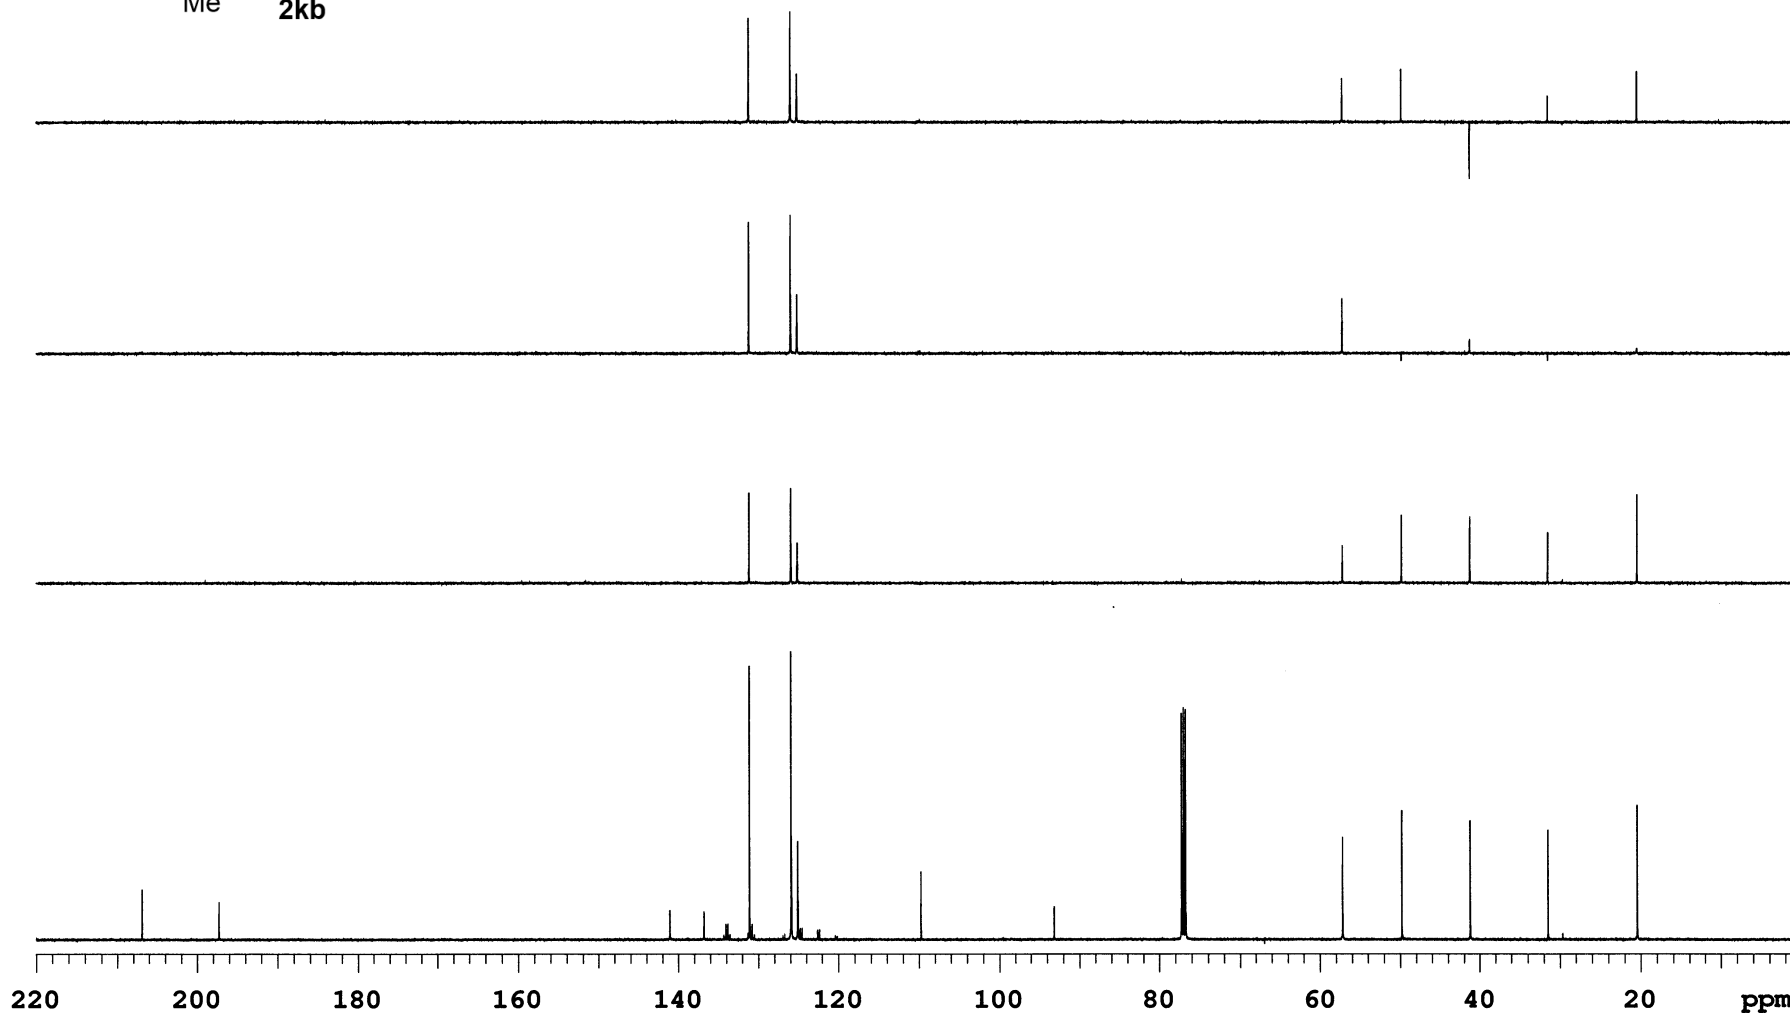

DEPT of compound 2kb

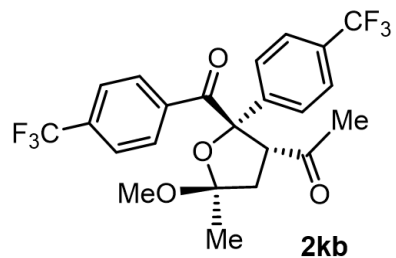

2kb

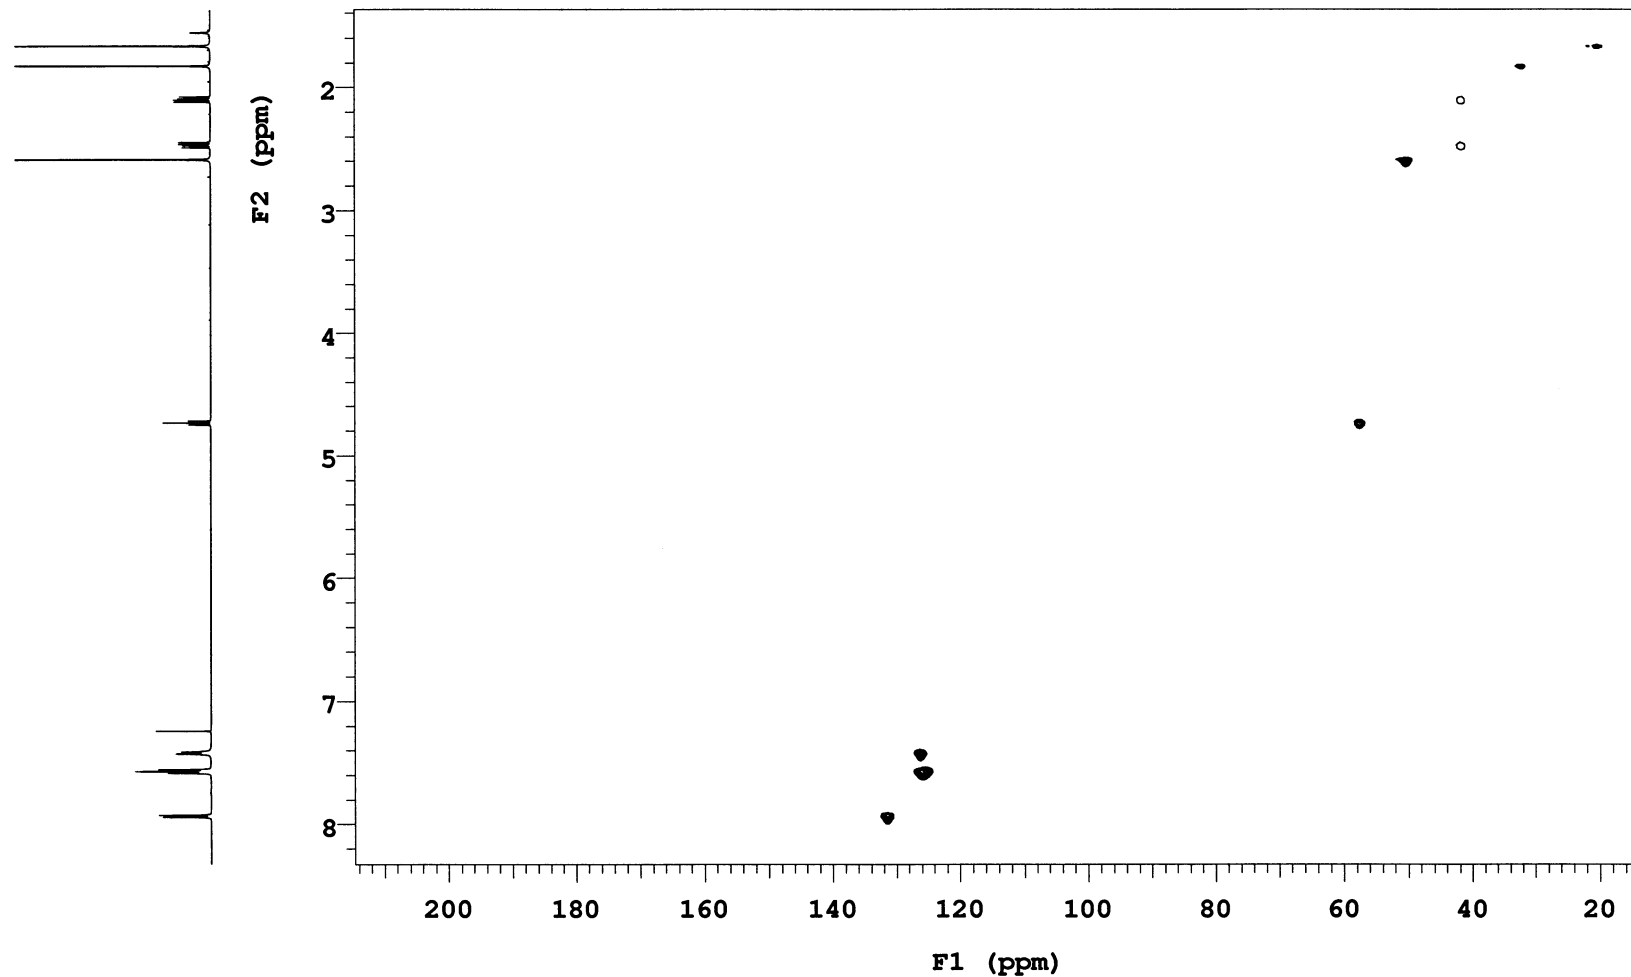

HSQC of compound 2kb

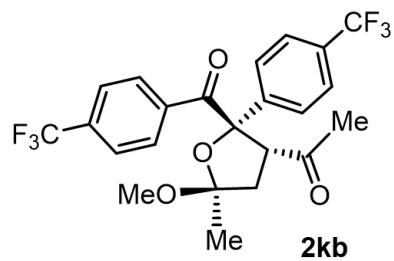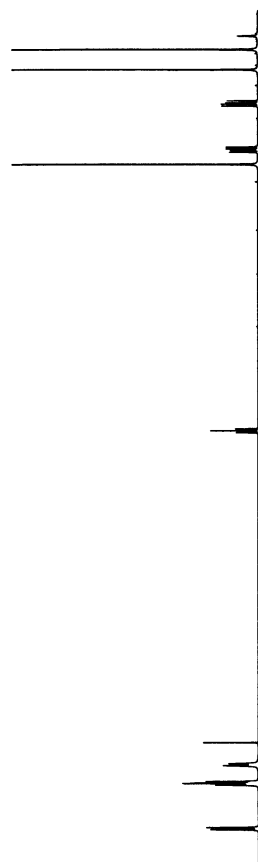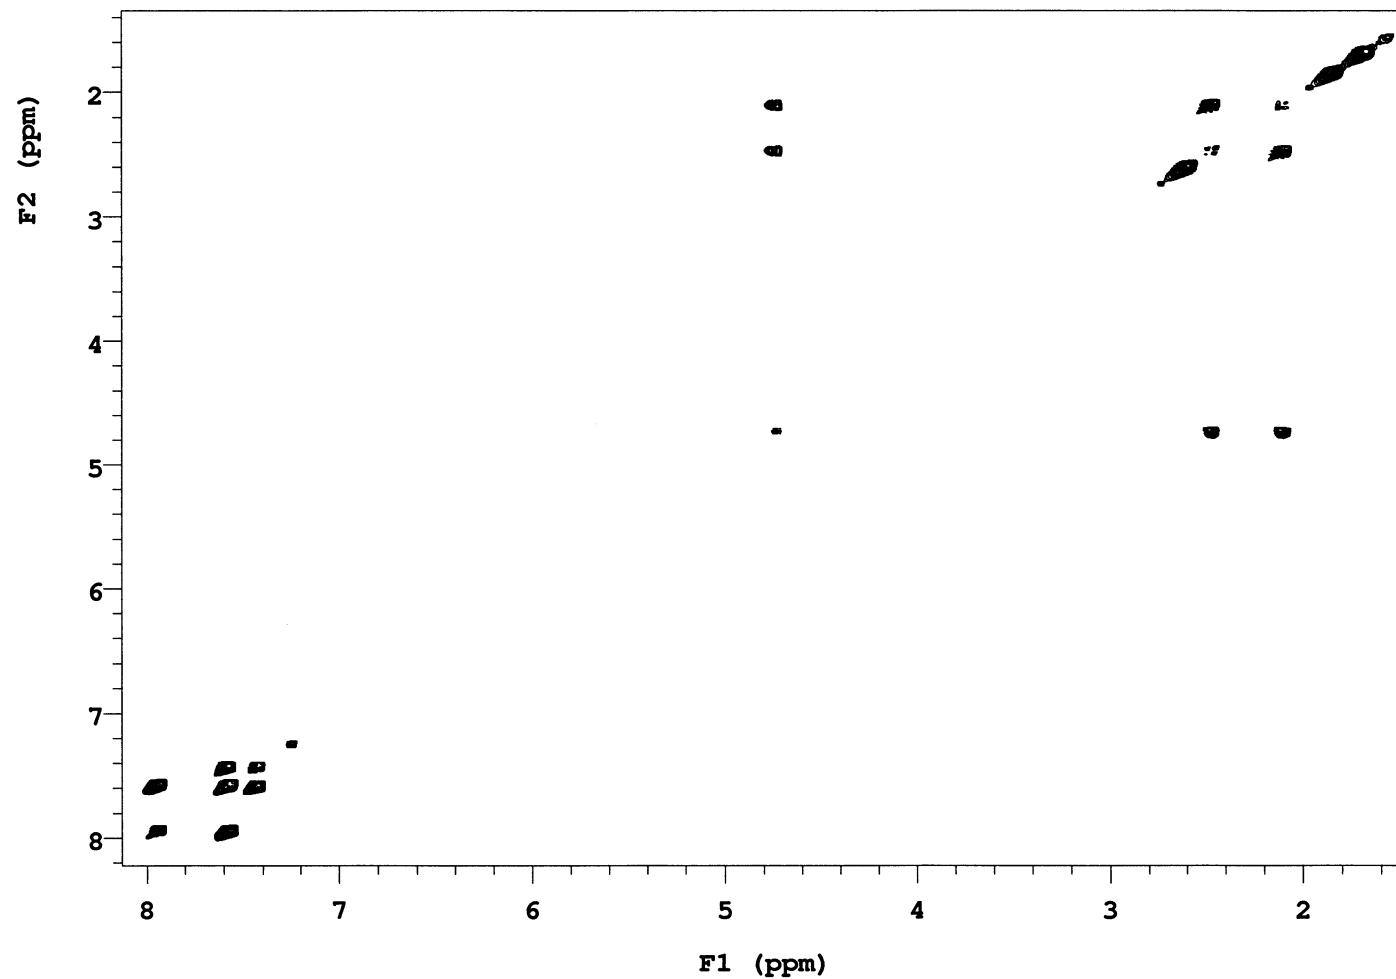

COSY of compound 2kb

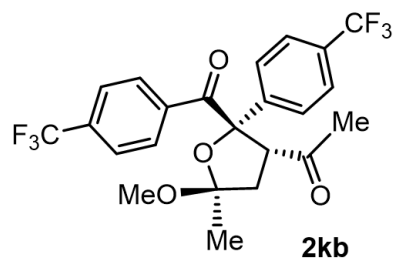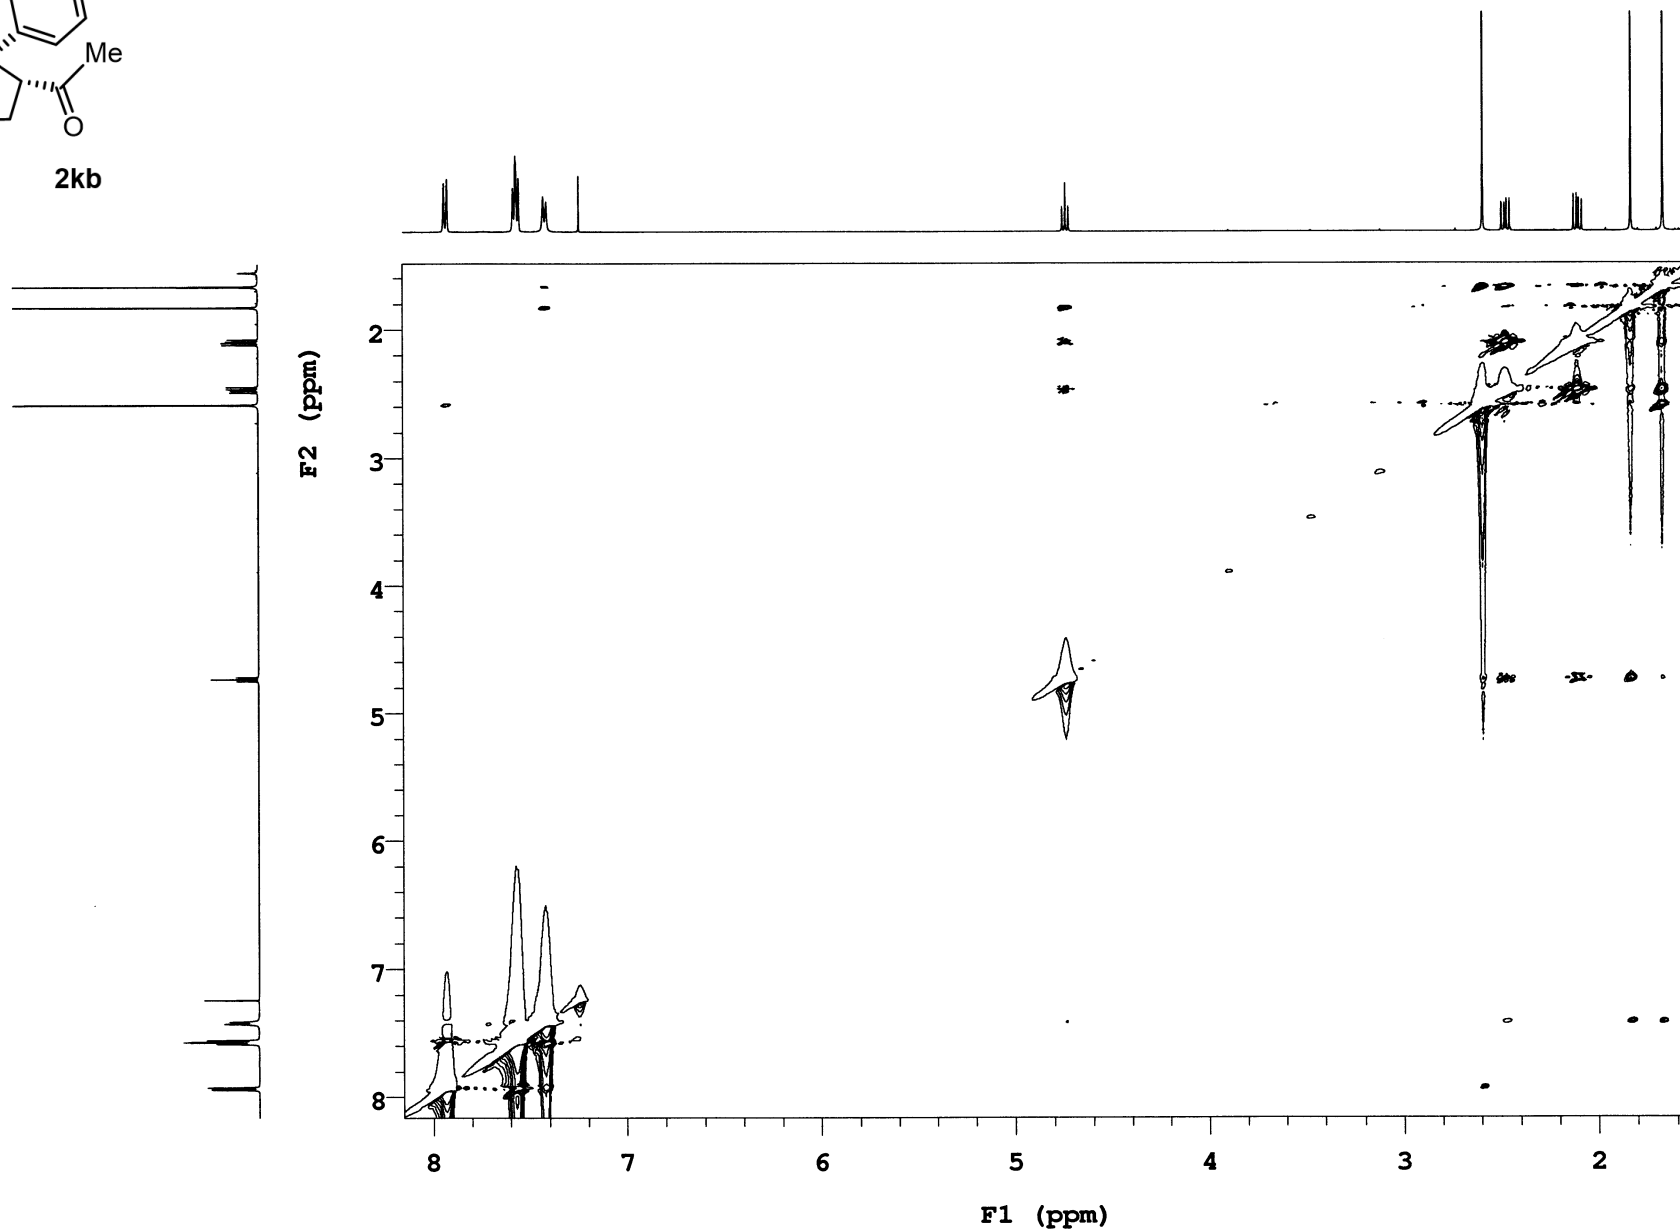

NOESY of compound 2kb

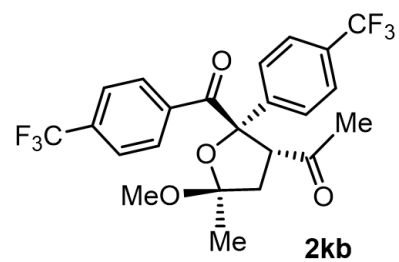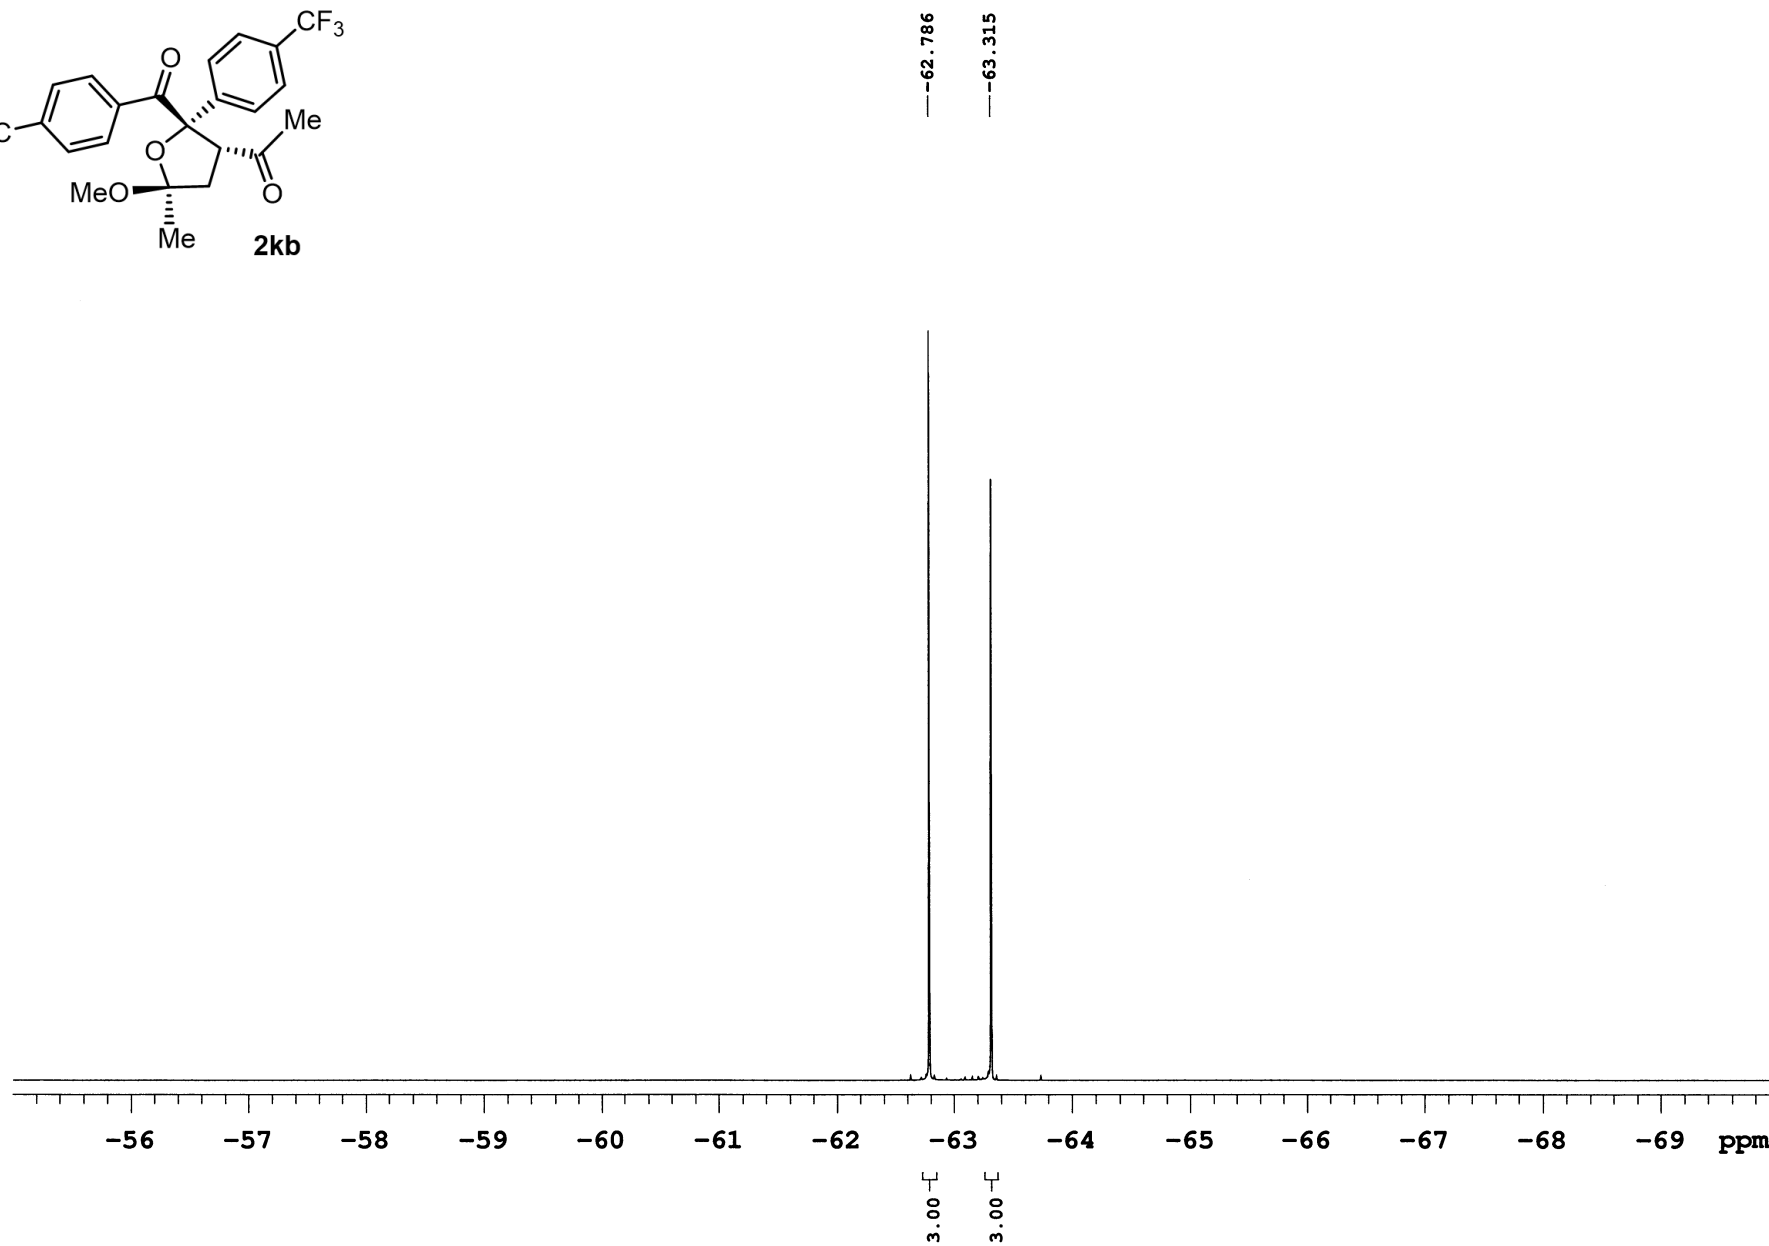

IRR-03-074

Sample Name IRR-03-074  
Date collected 2024-06-15Pulse sequence PROTON  
Solvent cdcl3Temperature 25  
Spectrometer Agilent-NMR-inova500Study owner vnmr2  
Operator vnmr2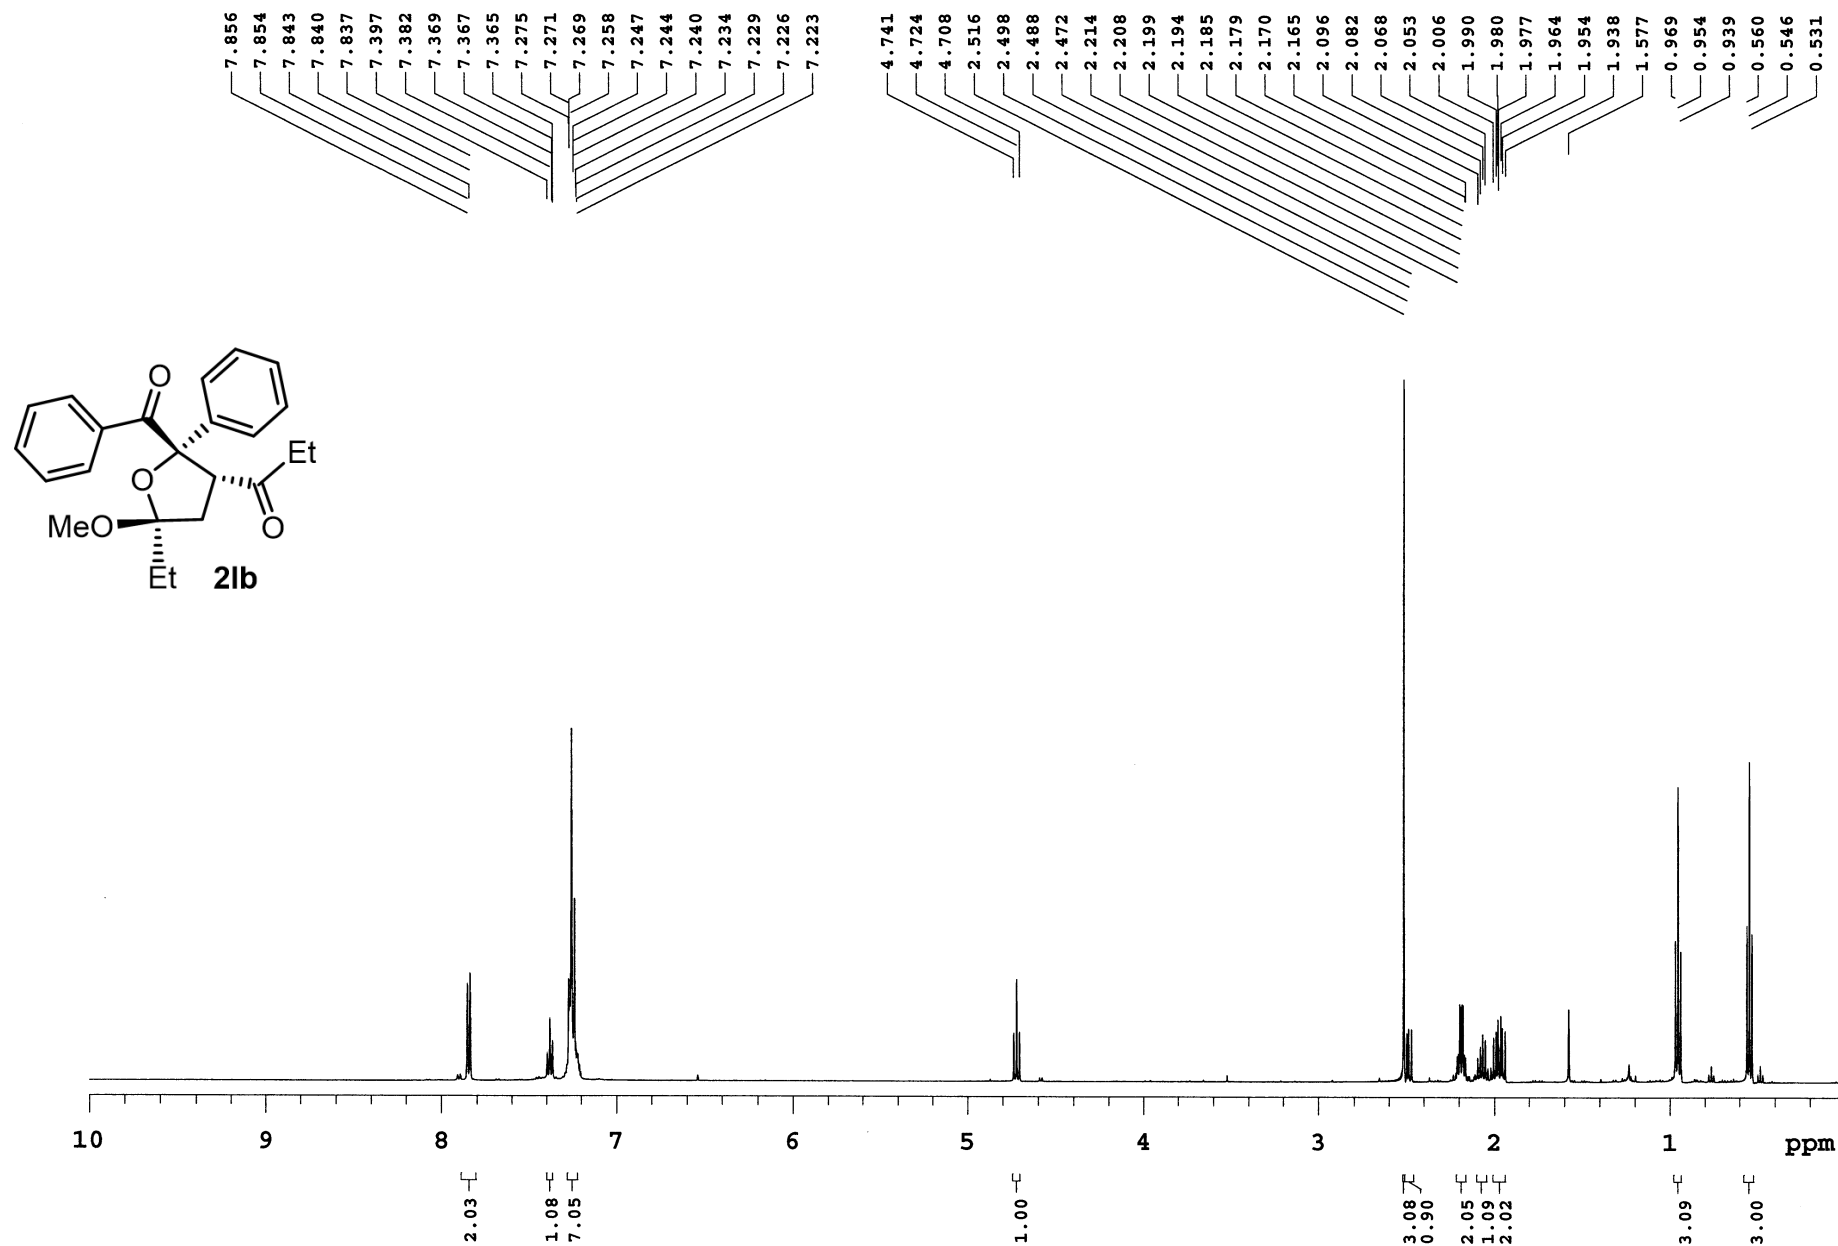1H NMR (500 MHz, CDCl<sub>3</sub>) of compound 21b

Sample Name IRR-03-074  
Date collected 2024-06-15Pulse sequence CARBON  
Solvent cdcl3Temperature 25  
Spectrometer Agilent-NMR-inova500Study owner vnmr2  
Operator vnmr2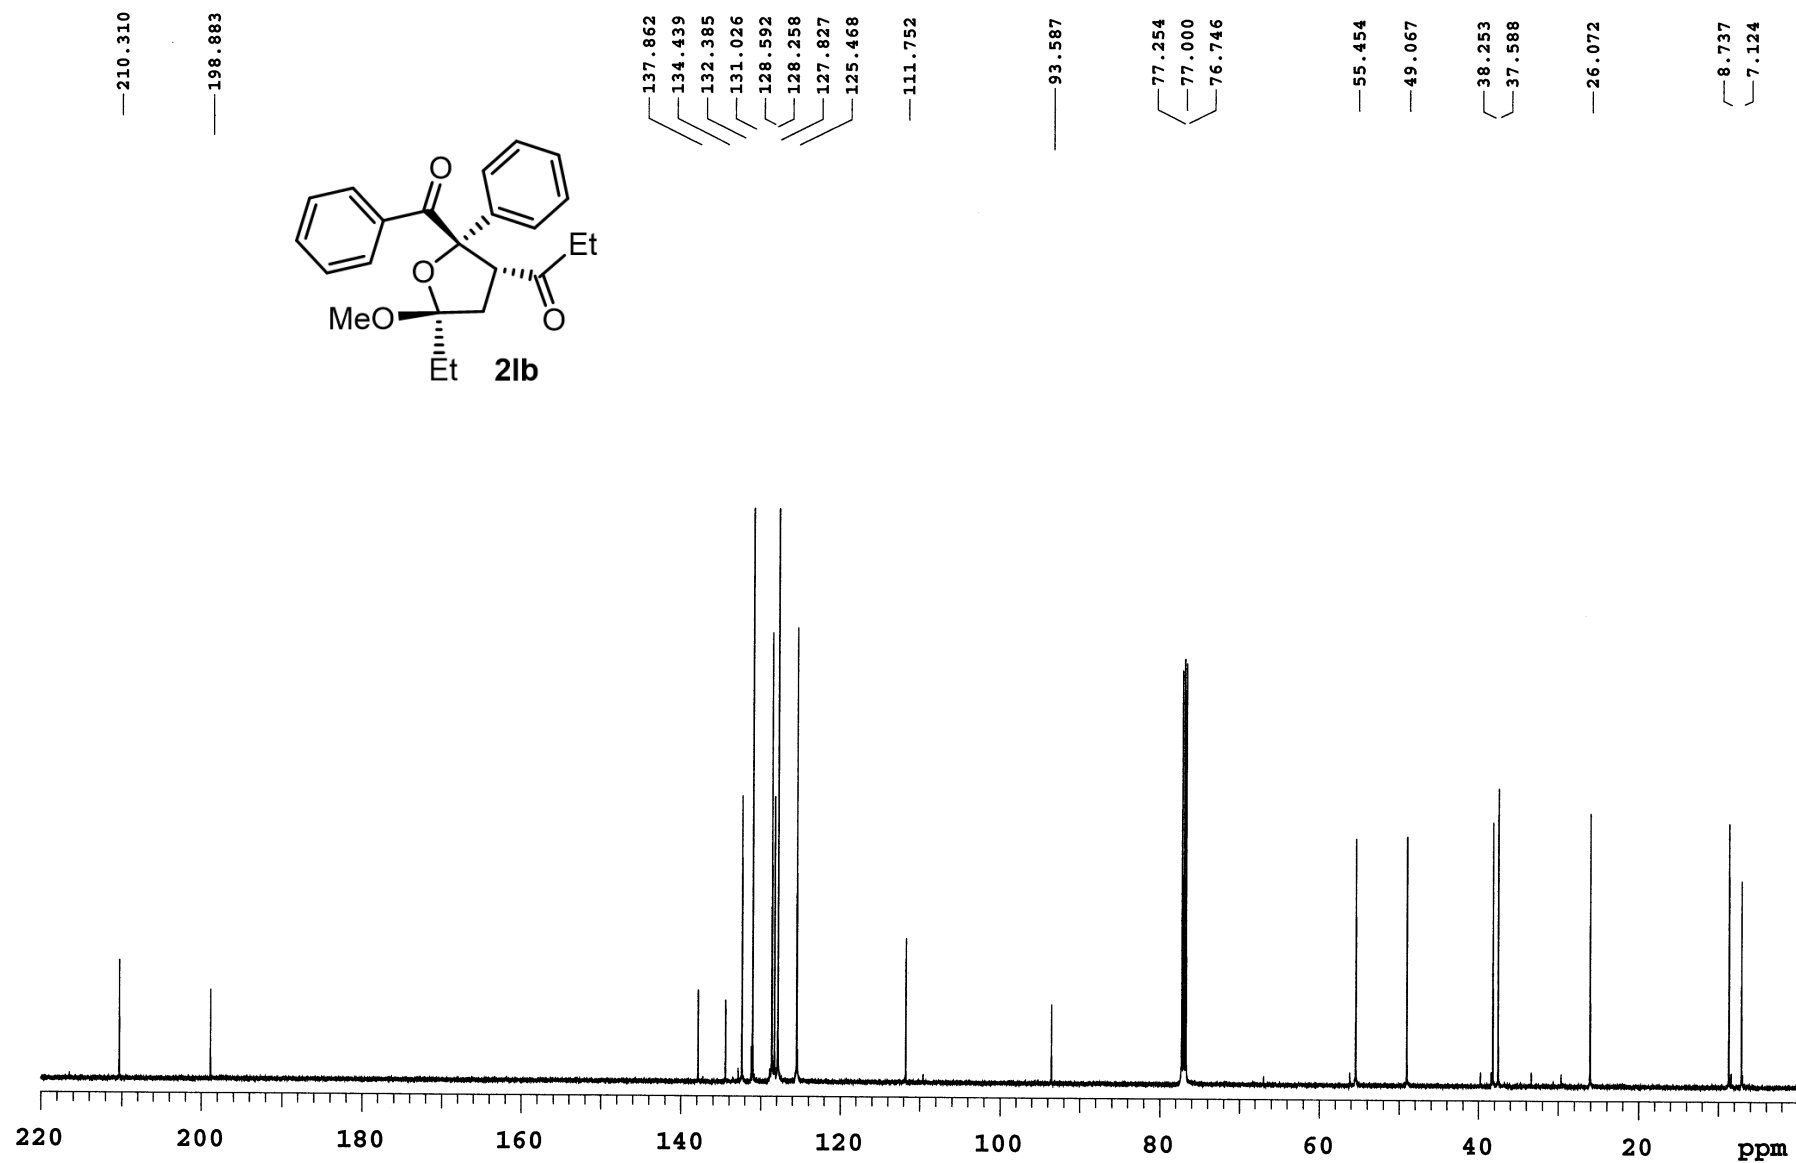



Sample Name IRR-03-074  
Date collected 2024-06-16

Pulse sequence DEPT  
Solvent cdcl3

Temperature 25  
Spectrometer Agilent-NMR-inova500

Study owner vnmr2  
Operator vnmr2

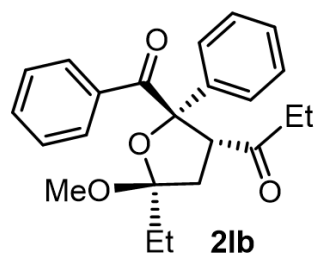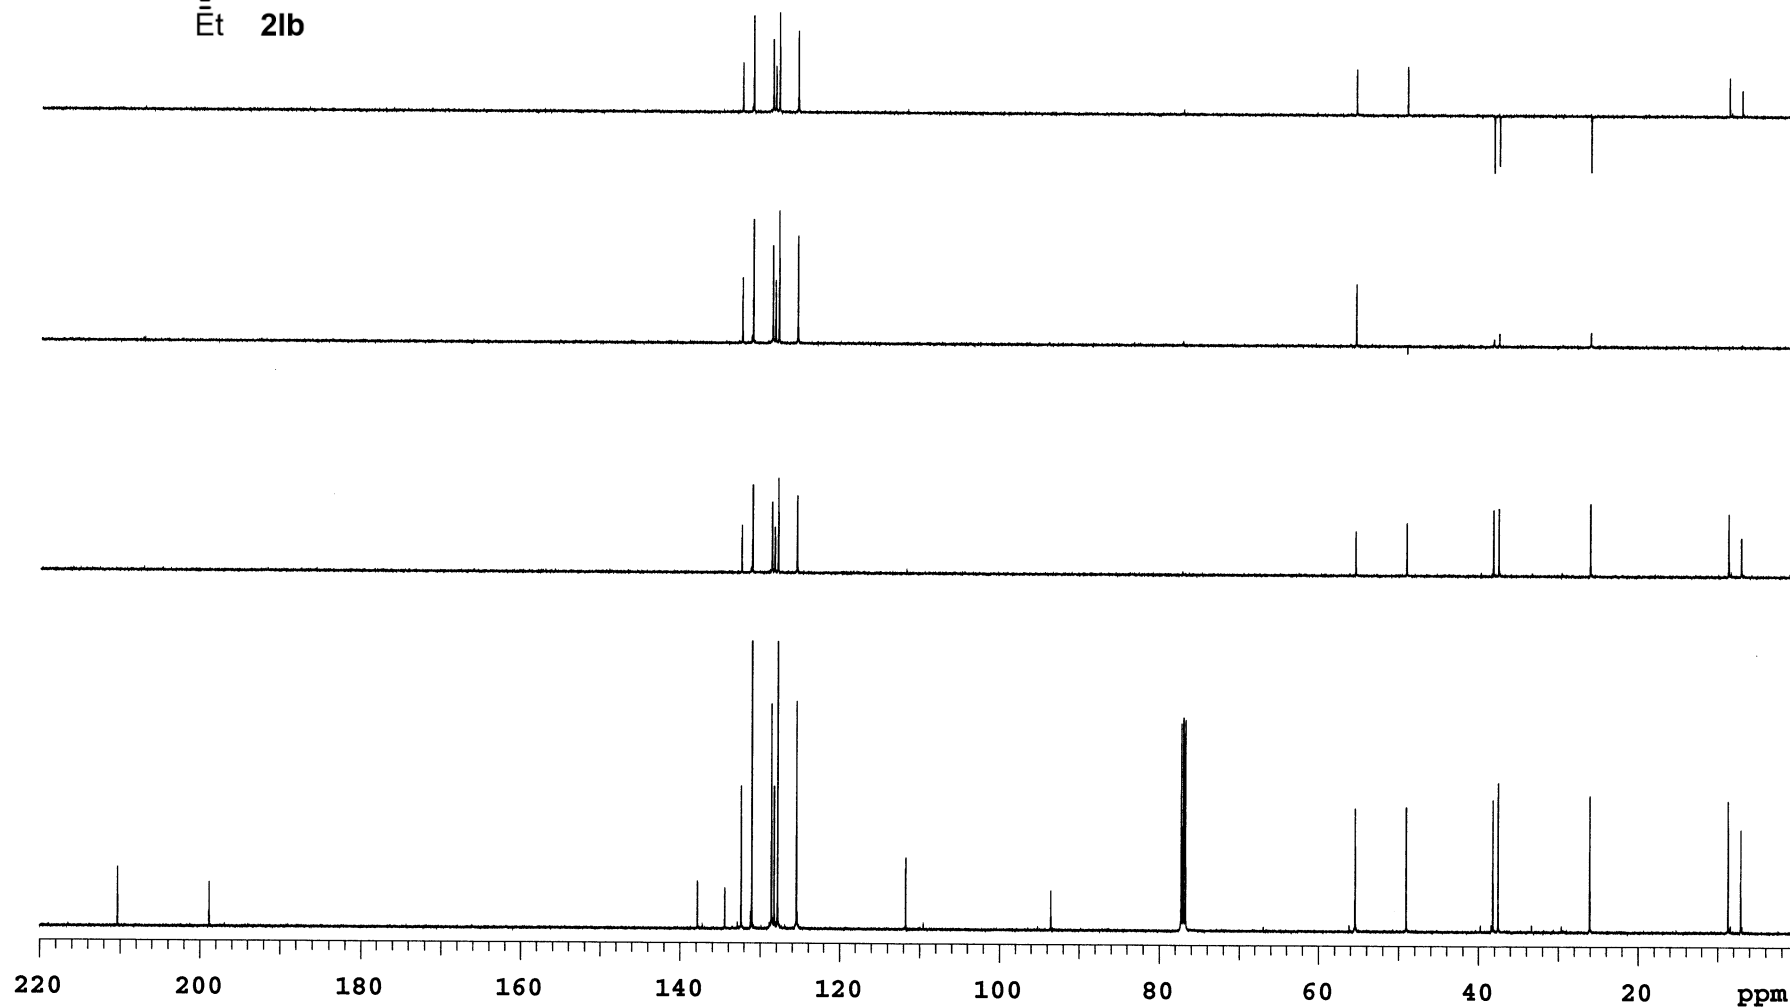

DEPT of compound 21b

Sample Name IRR-03-074  
Date collected 2024-06-16

Pulse sequence gHSQC  
Solvent cdcl3

Temperature 25  
Spectrometer Agilent-NMR-inova500

Study owner vnmr2  
Operator vnmr2

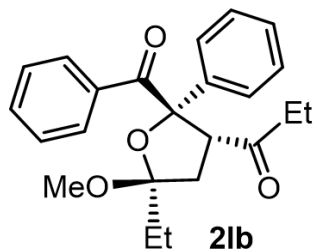

21b

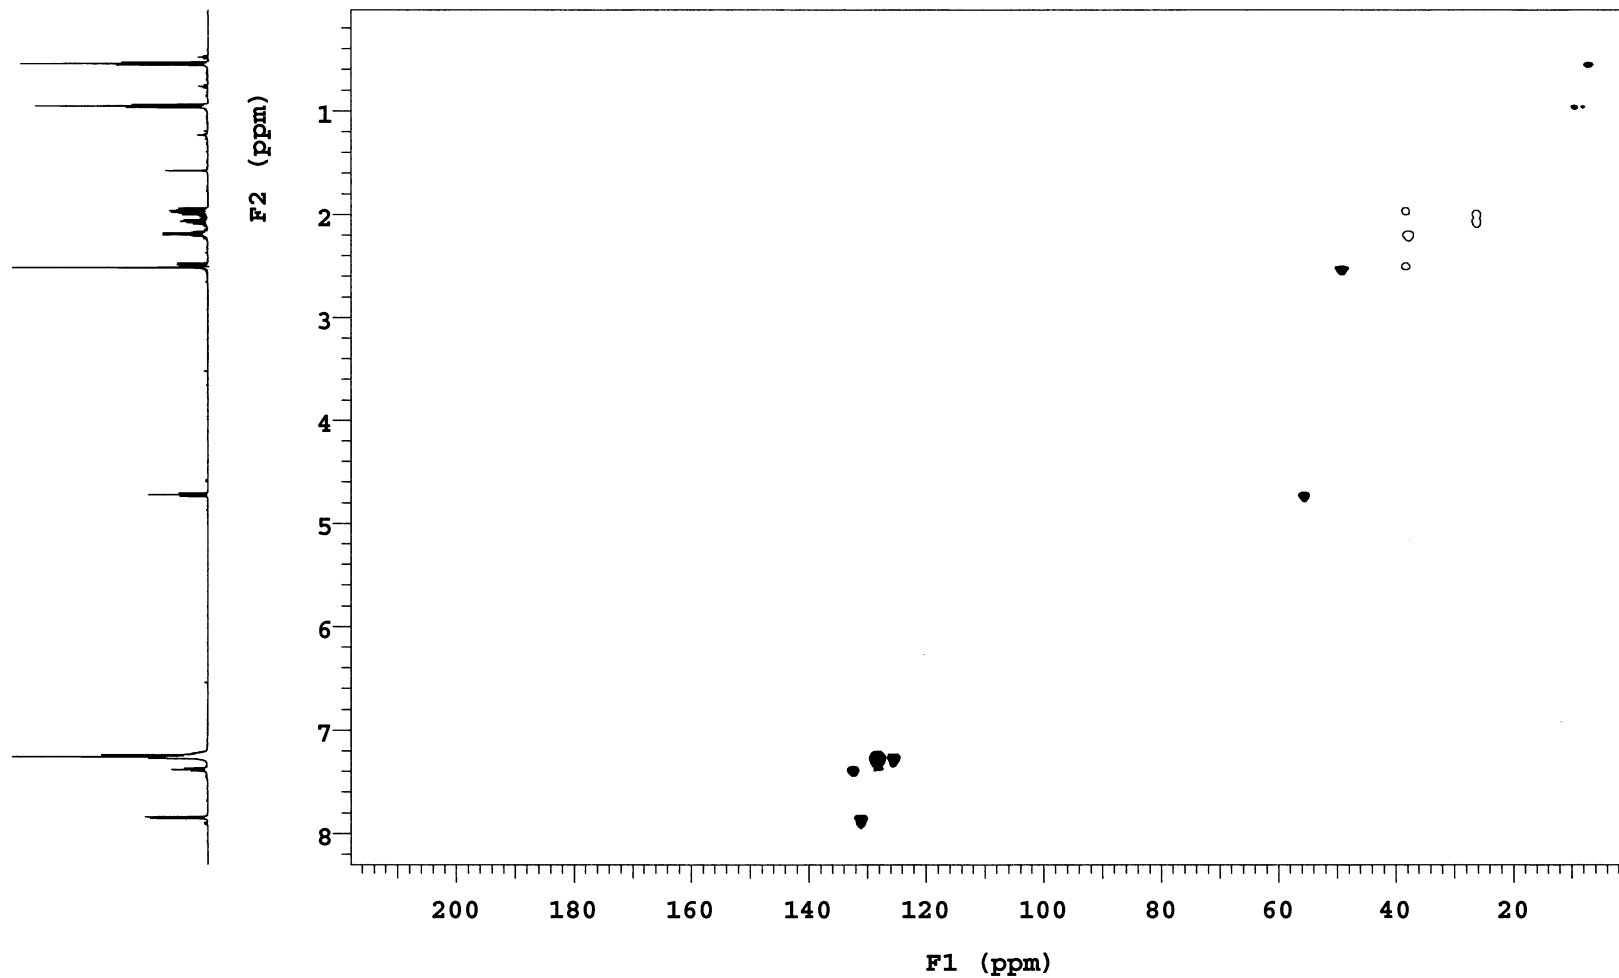

HSQC of compound 21b

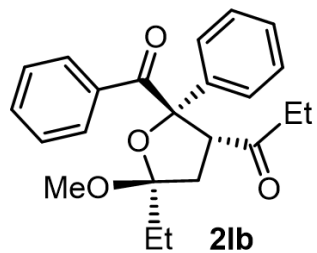

Sample Name IRR-03-074  
Date collected 2024-06-16

Pulse sequence gCOSY  
Solvent cdcl3

Temperature 25  
Spectrometer Agilent-NMR-inova500

Study owner vnmr2  
Operator vnmr2

21b

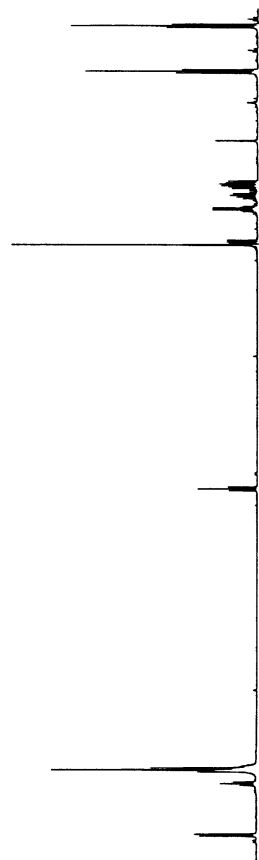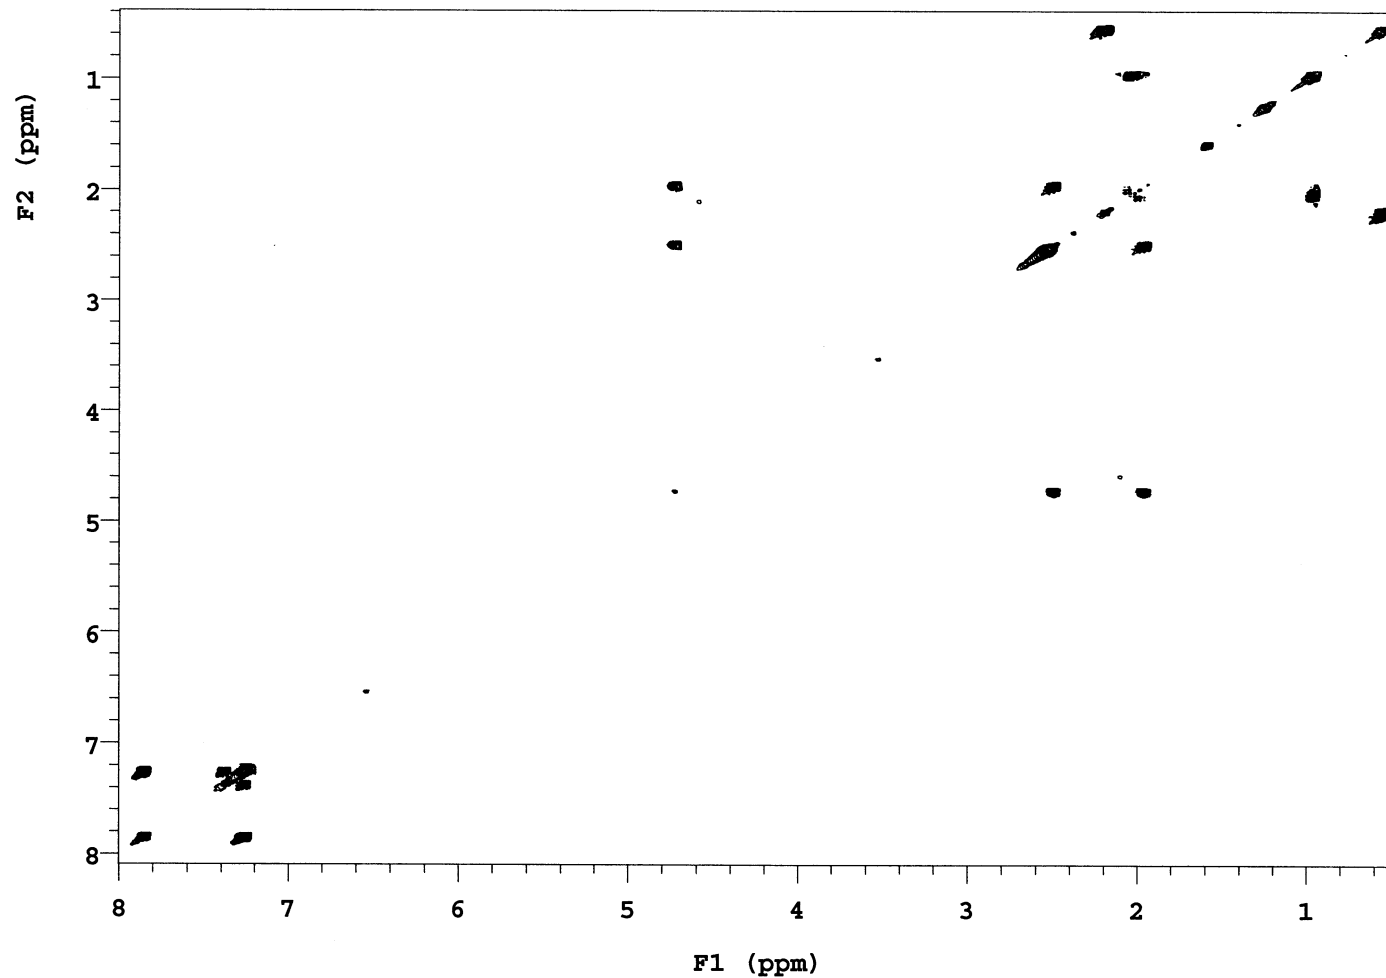

COSY of compound 21b

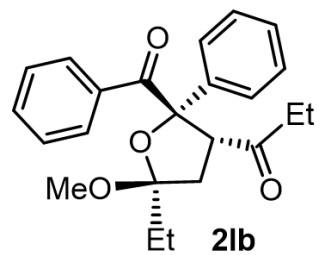

Sample Name IRR-03-074  
Date collected 2024-06-16

Pulse sequence NOESY  
Solvent cdcl3

Temperature 25  
Spectrometer Agilent-NMR-inova500

Study owner vnmr2  
Operator vnmr2

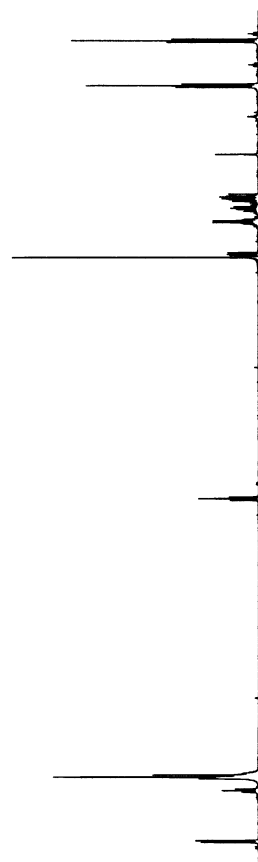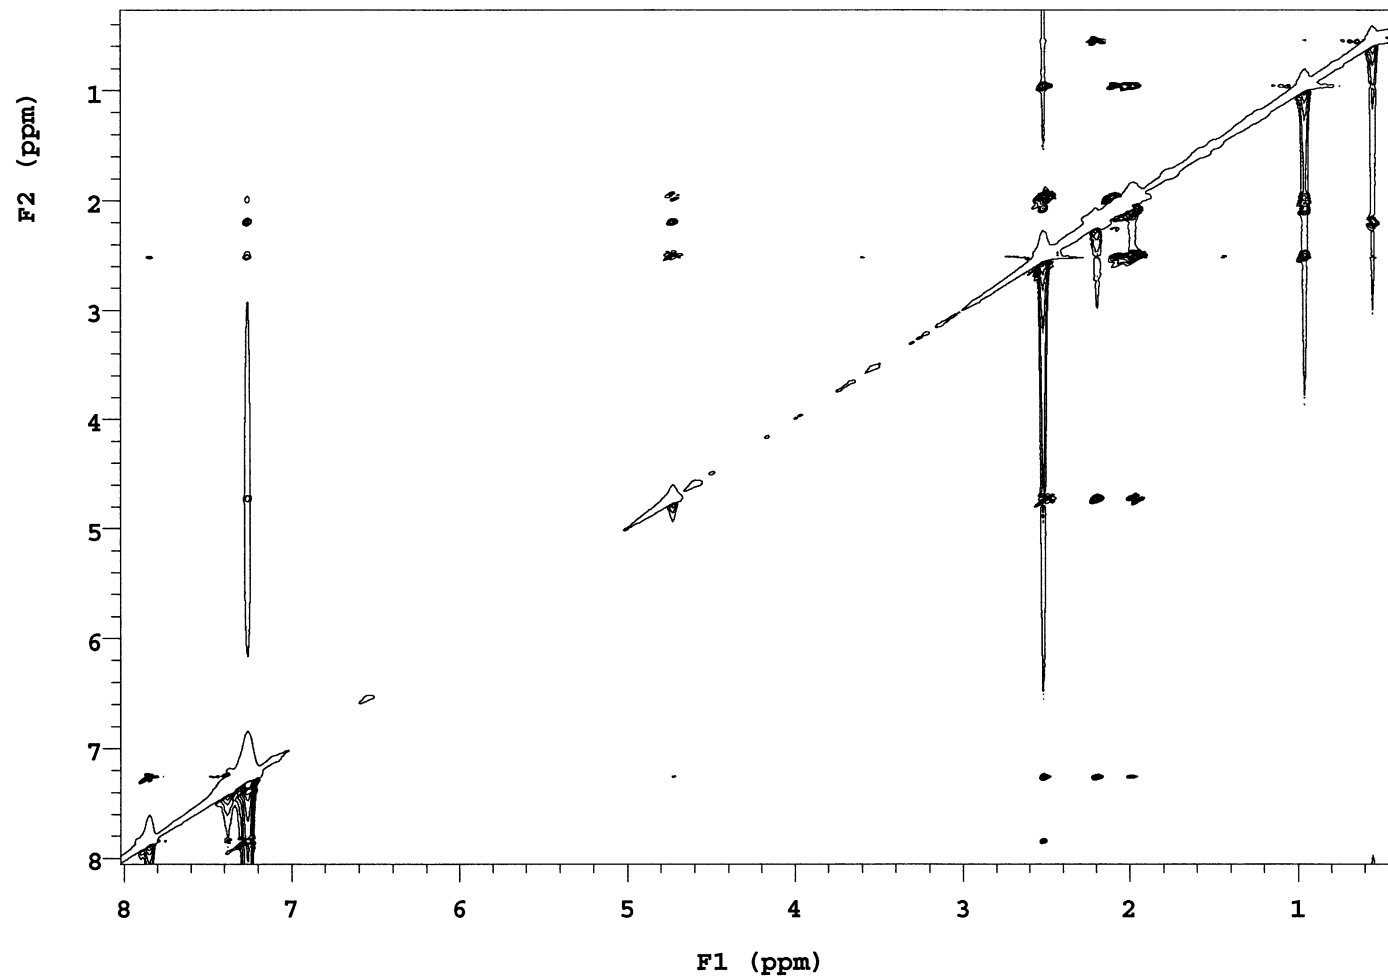

NOESY of compound 21b

IRR-03-116

Sample Name IRR-03-116  
Date collected 2024-09-07Pulse sequence PROTON  
Solvent cdcl3Temperature 25  
Spectrometer Agilent-NMR-inova500Study owner vnmr2  
Operator vnmr2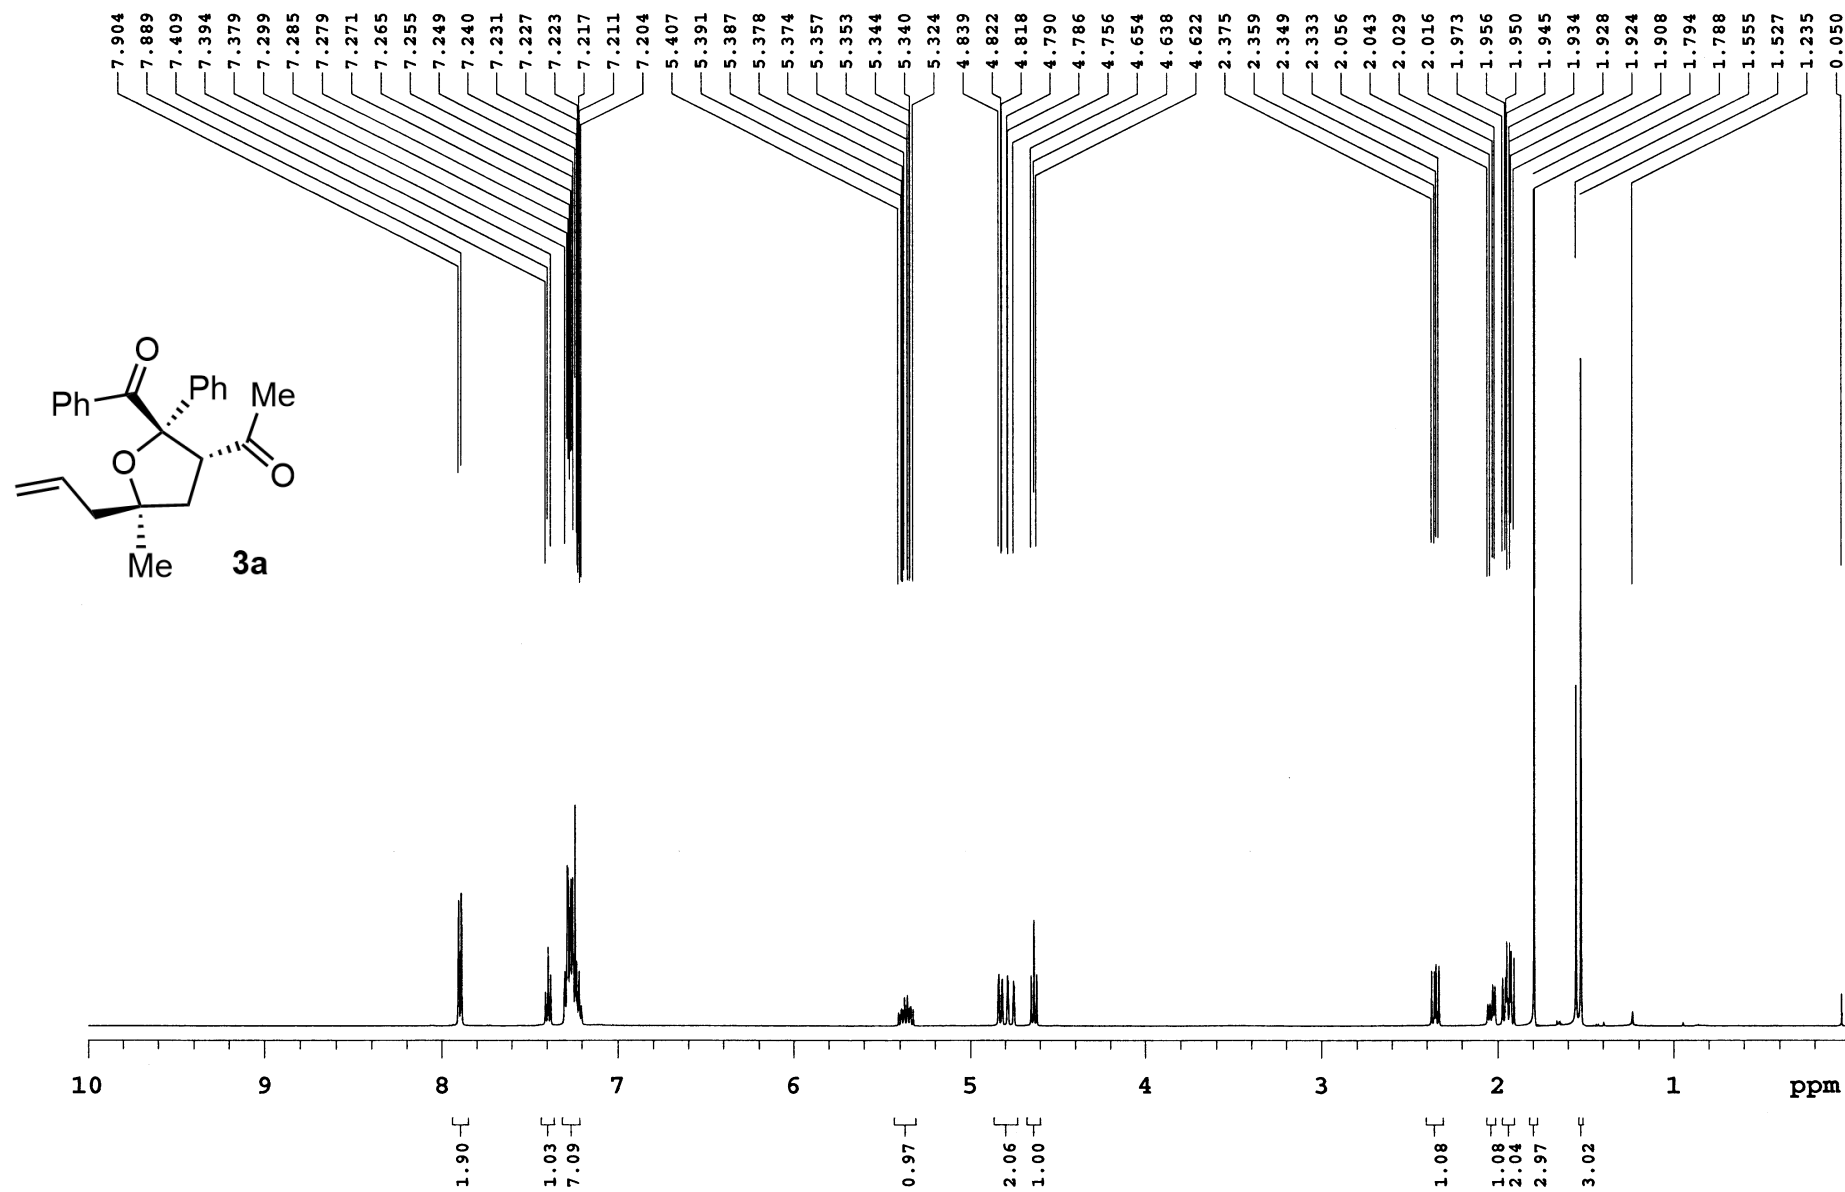

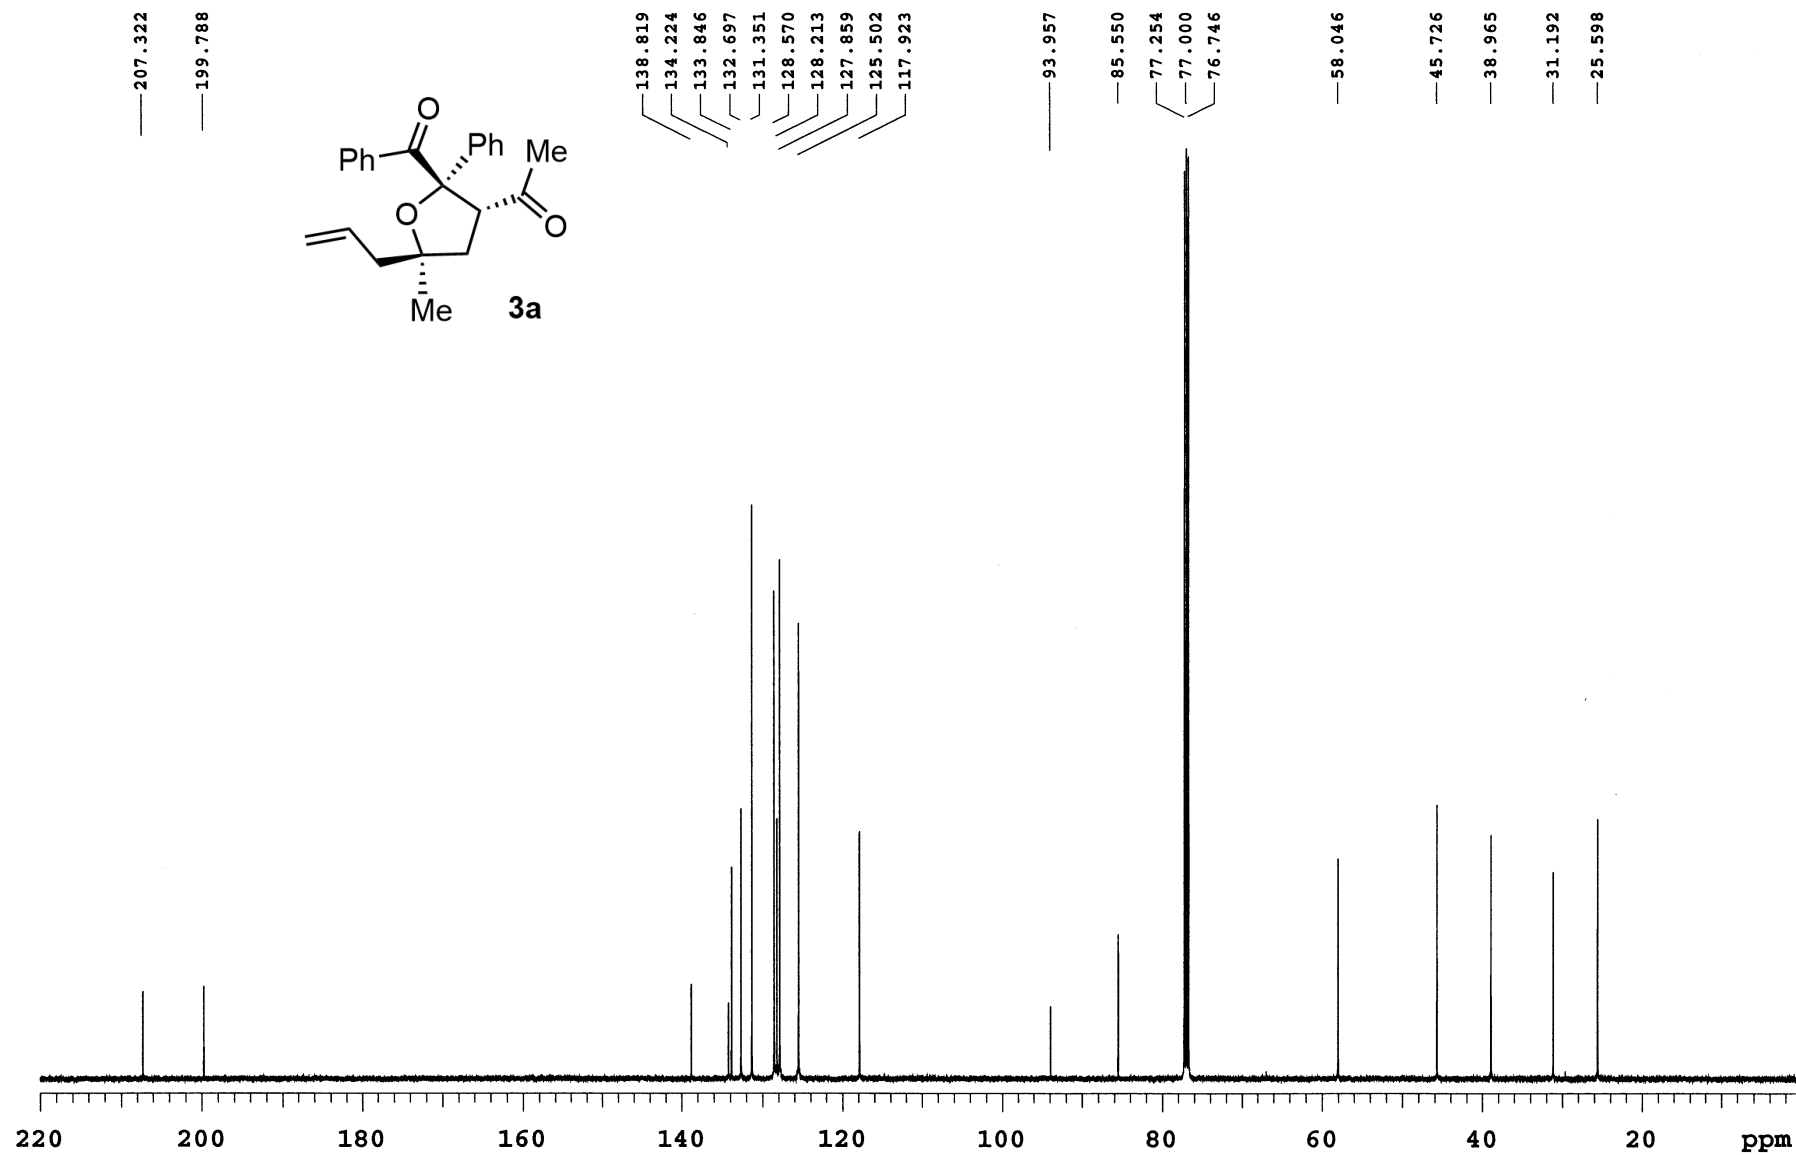13C NMR (125 MHz, CDCl<sub>3</sub>) of compound 3a

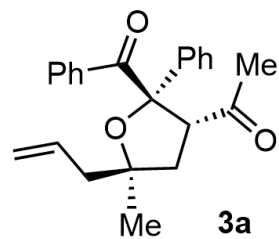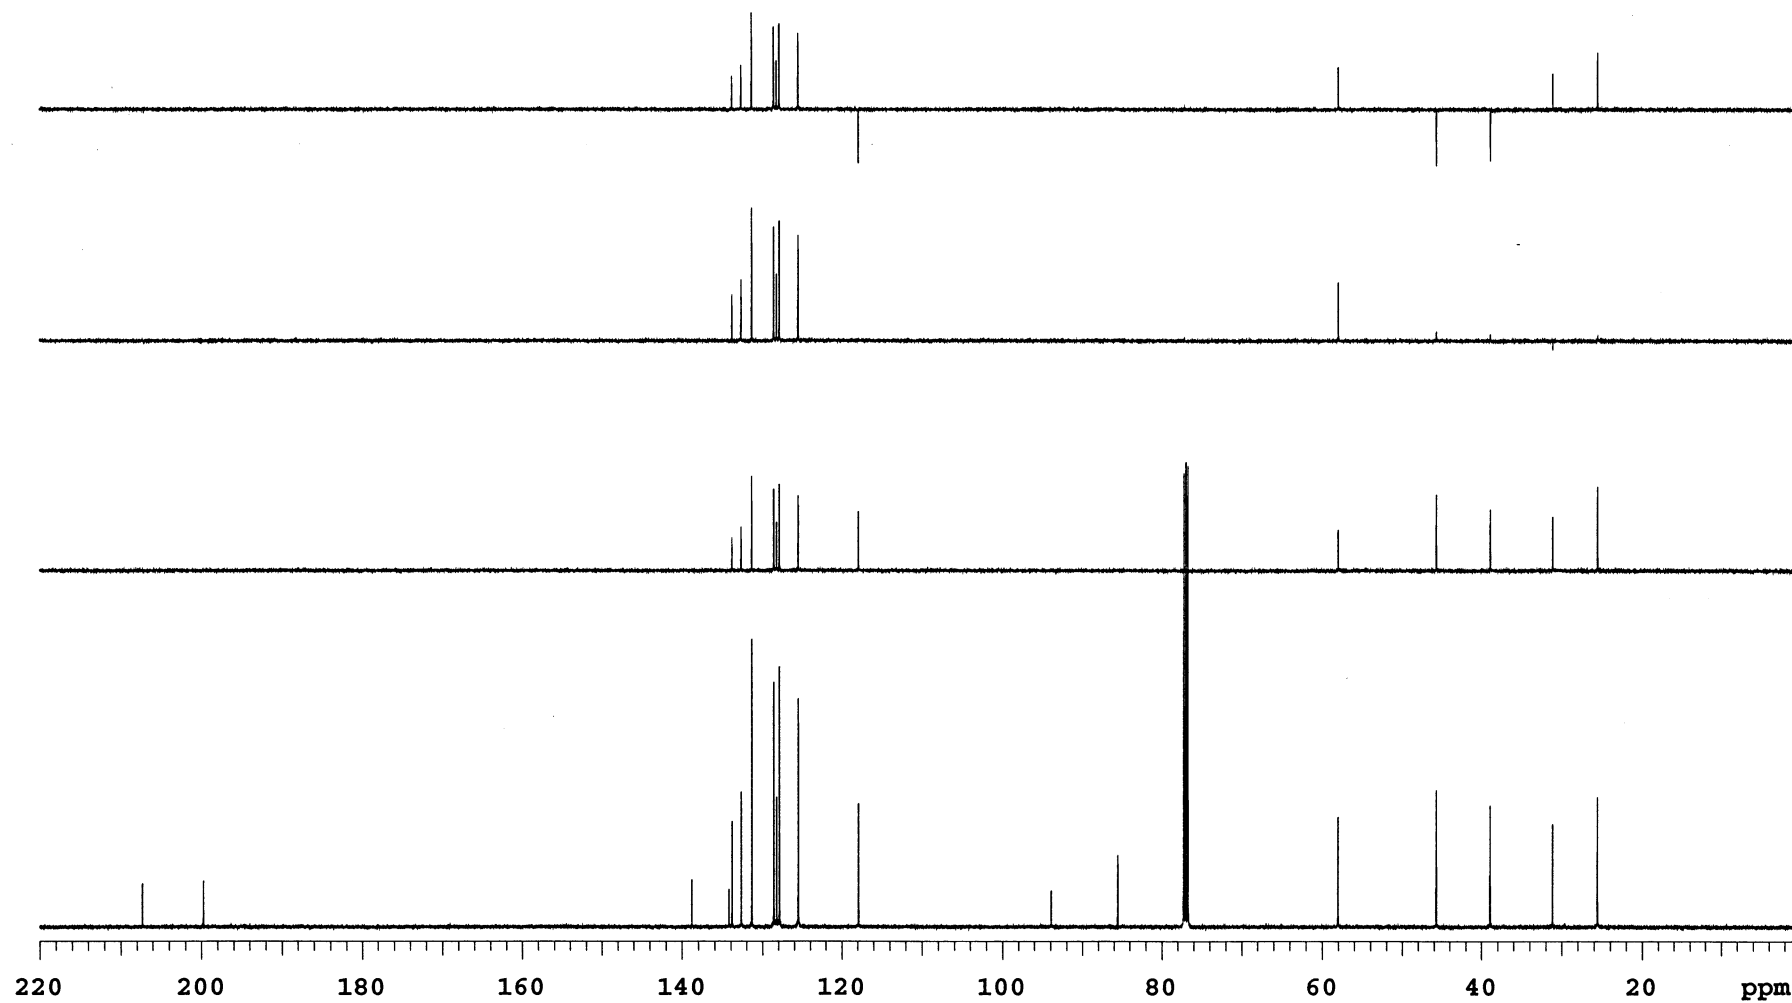

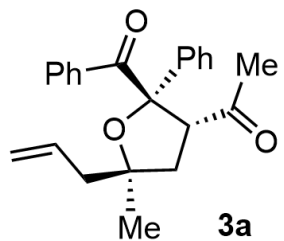

3a

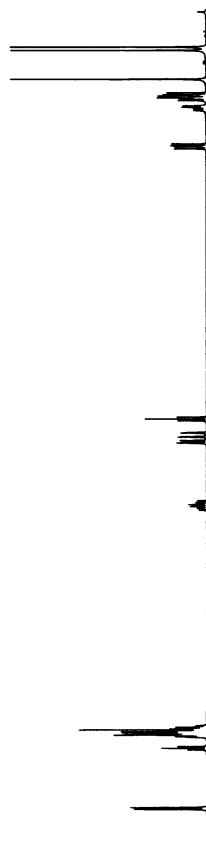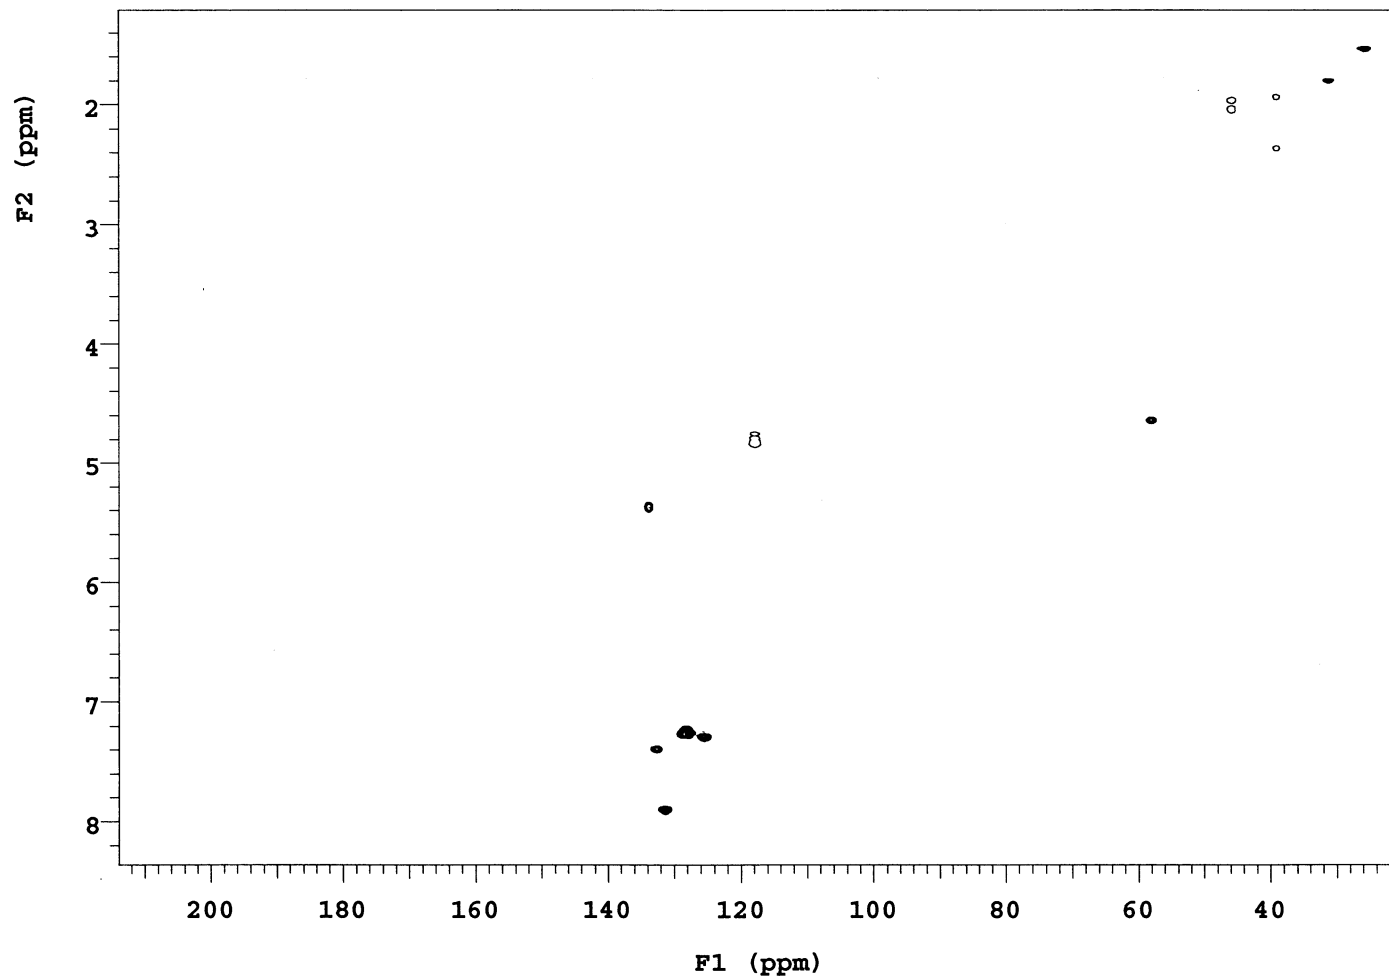

HSQC of compound 3a



Sample Name IRR-03-116  
Date collected 2024-09-08

Pulse sequence gCOSY  
Solvent cdcl3

Temperature 25  
Spectrometer Agilent-NMR-inova500

Study owner vnmr2  
Operator vnmr2

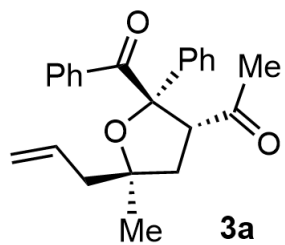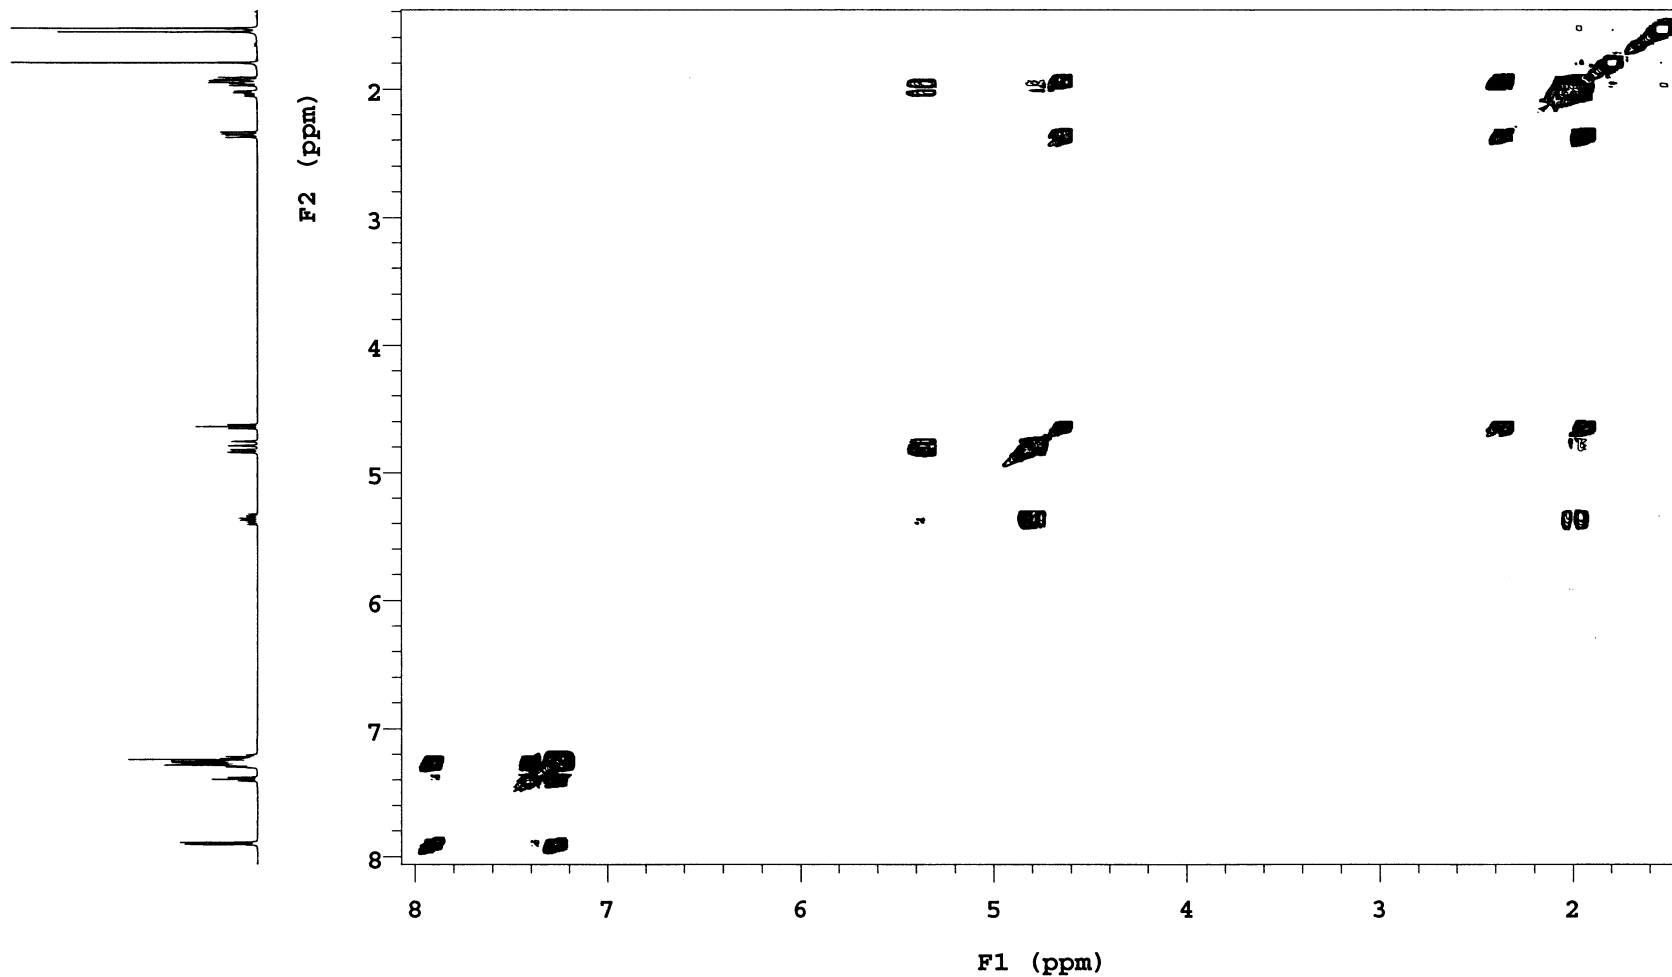

COSY of compound 3a

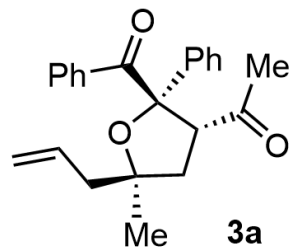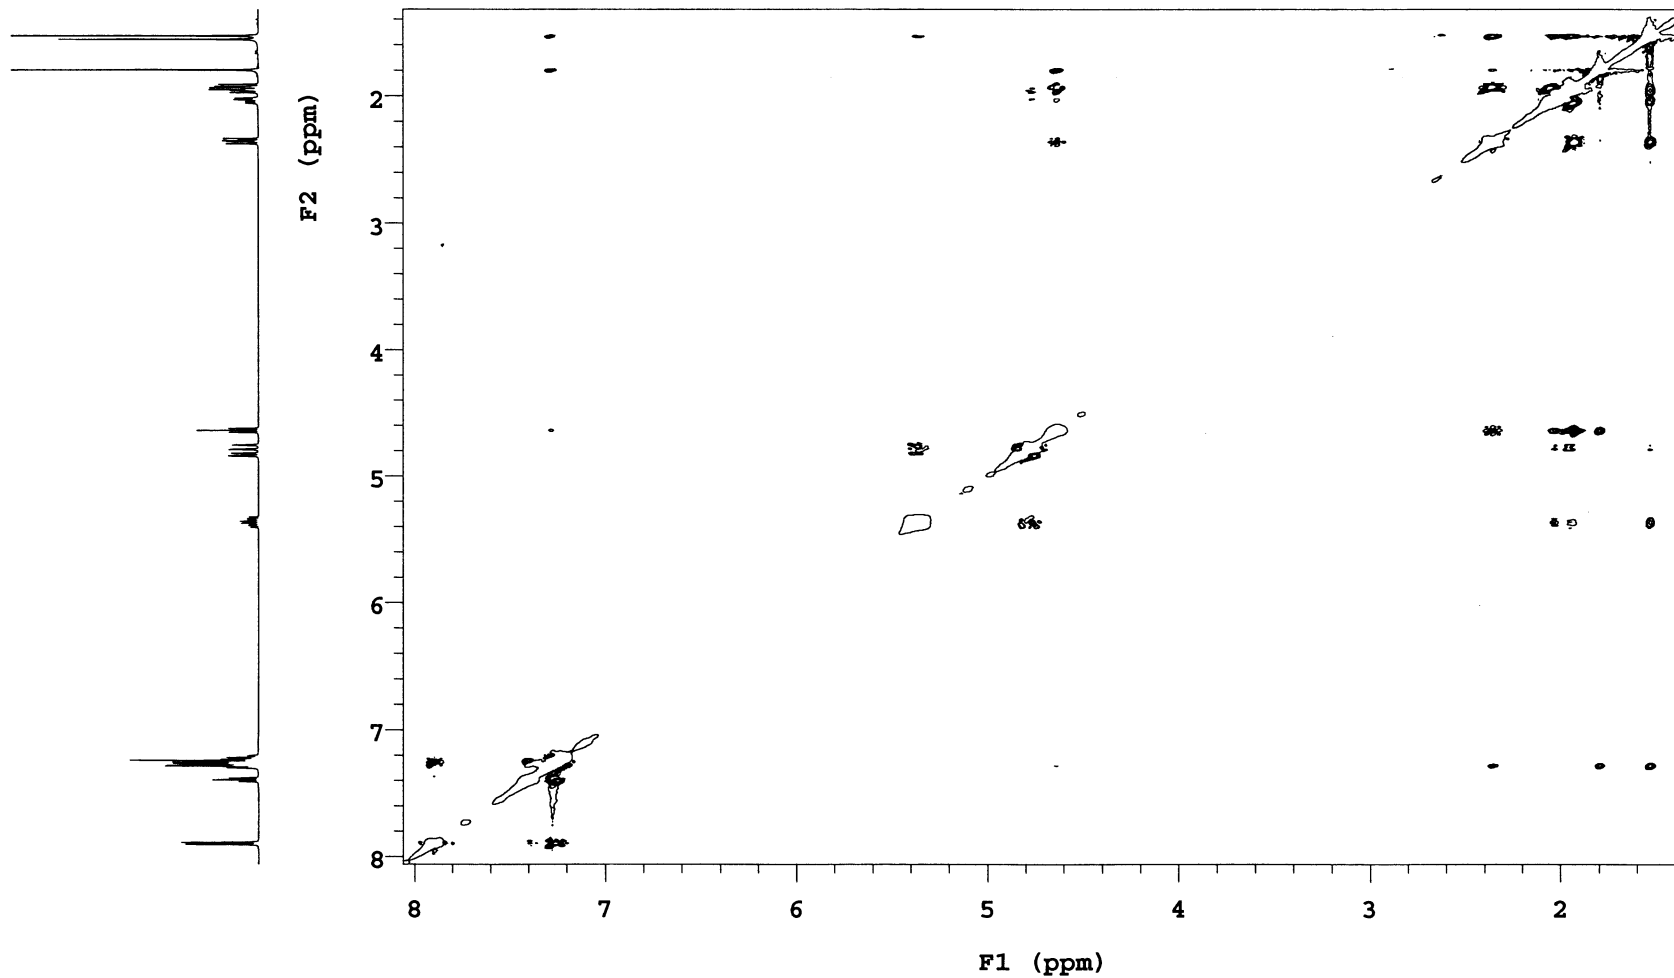

NOESY of compound 3a

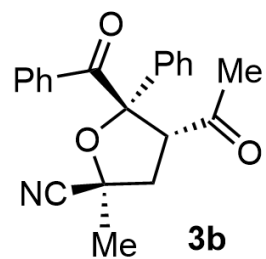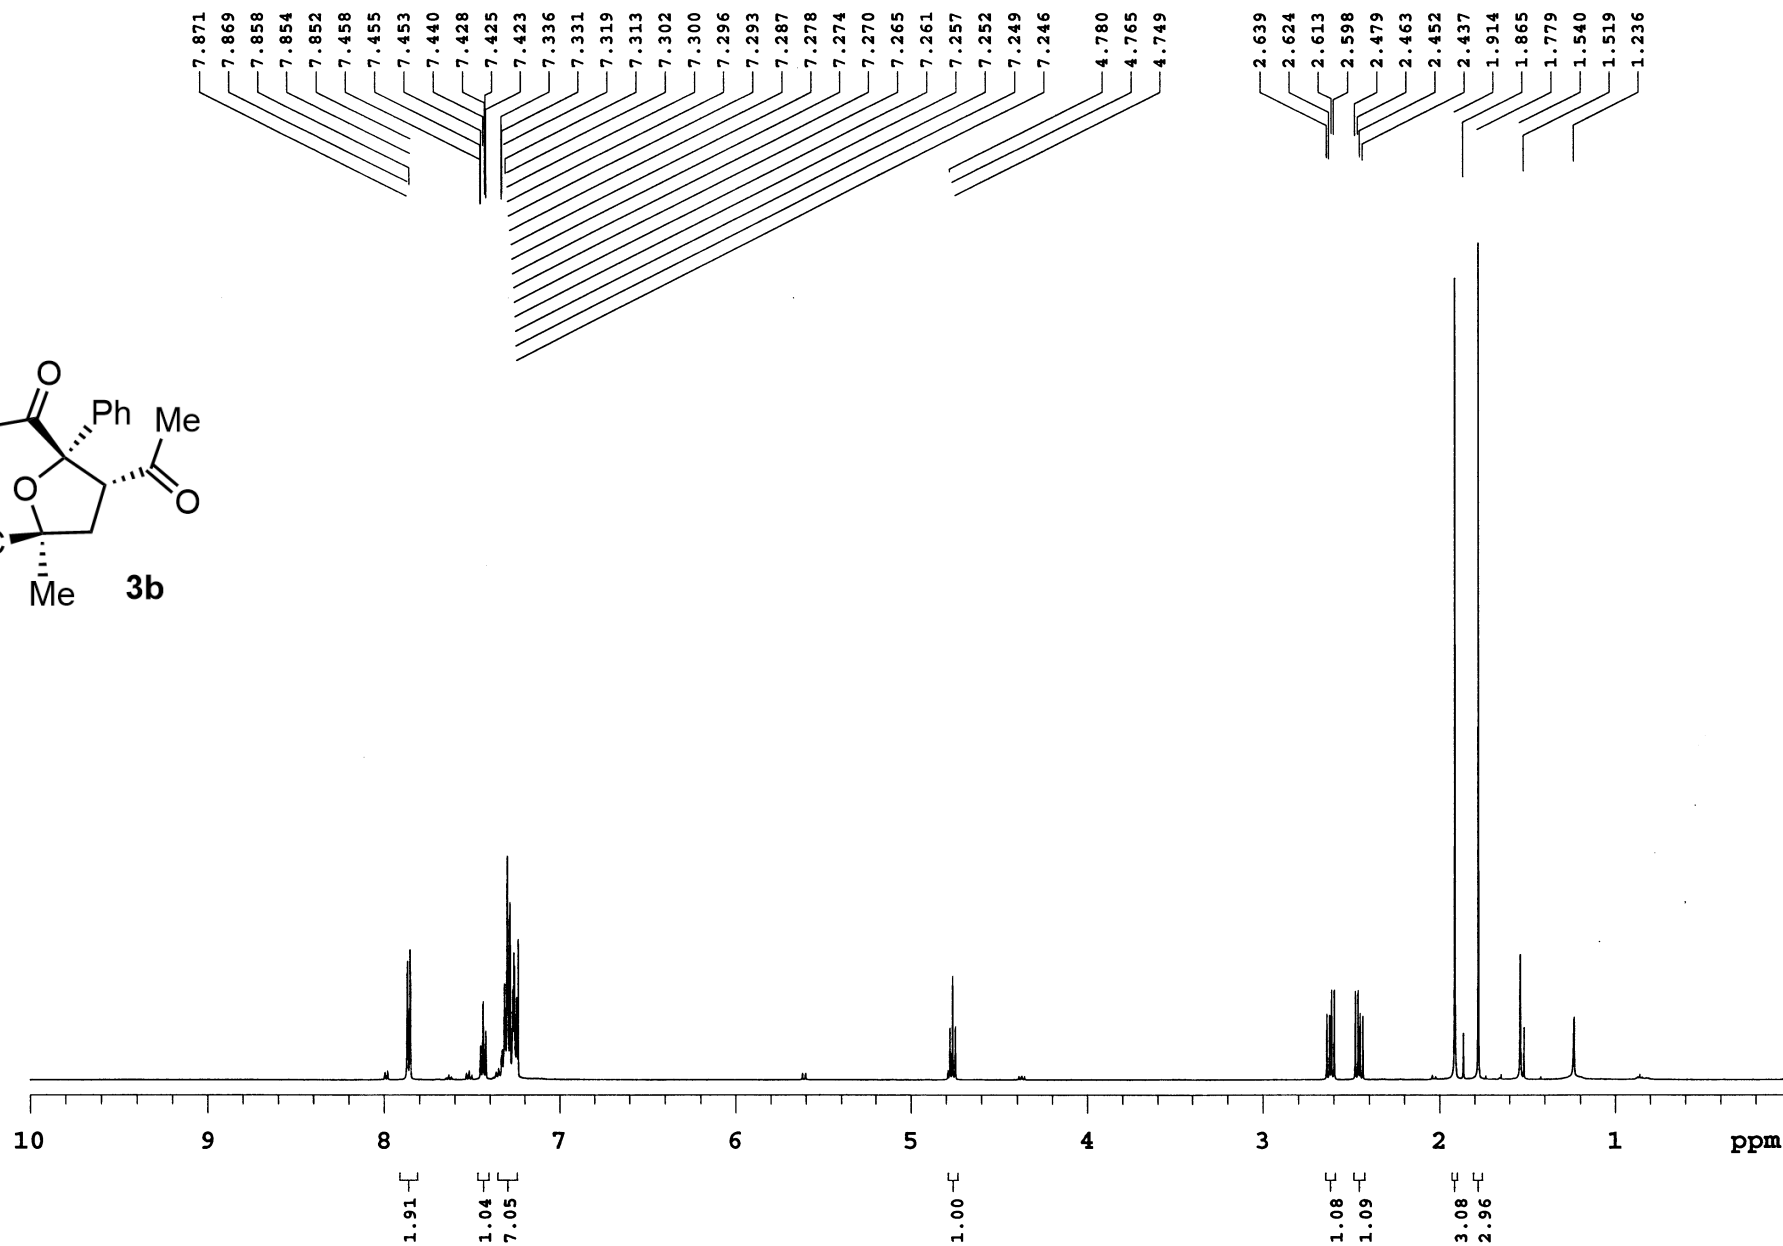

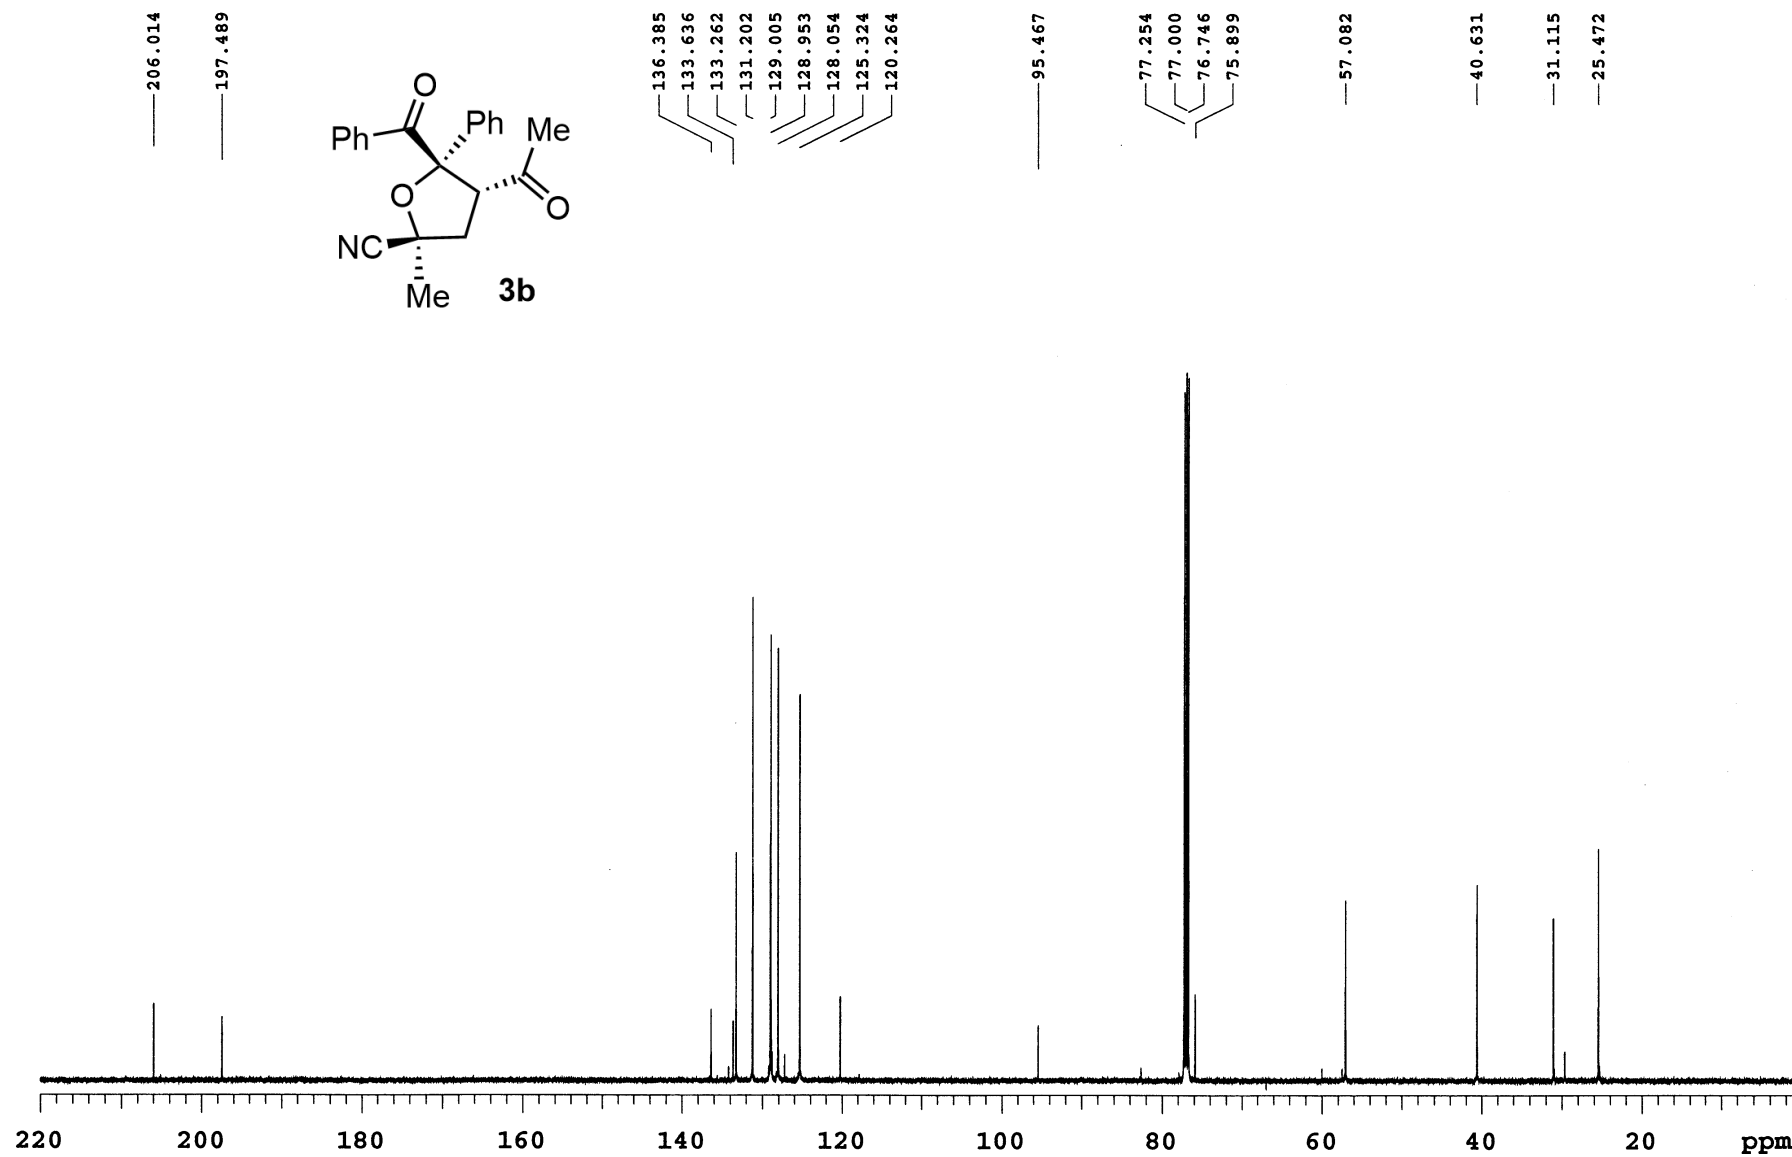

Sample Name **IRR-03-109**  
Date collected **2024-09-11**

Pulse sequence **DEPT**  
Solvent **cdcl3**

Temperature **25**  
Spectrometer **Agilent-NMR-inova500**

Study owner **vnmr2**  
Operator **vnmr2**

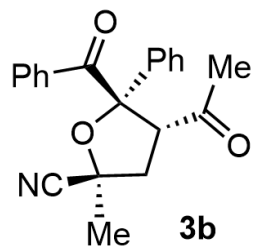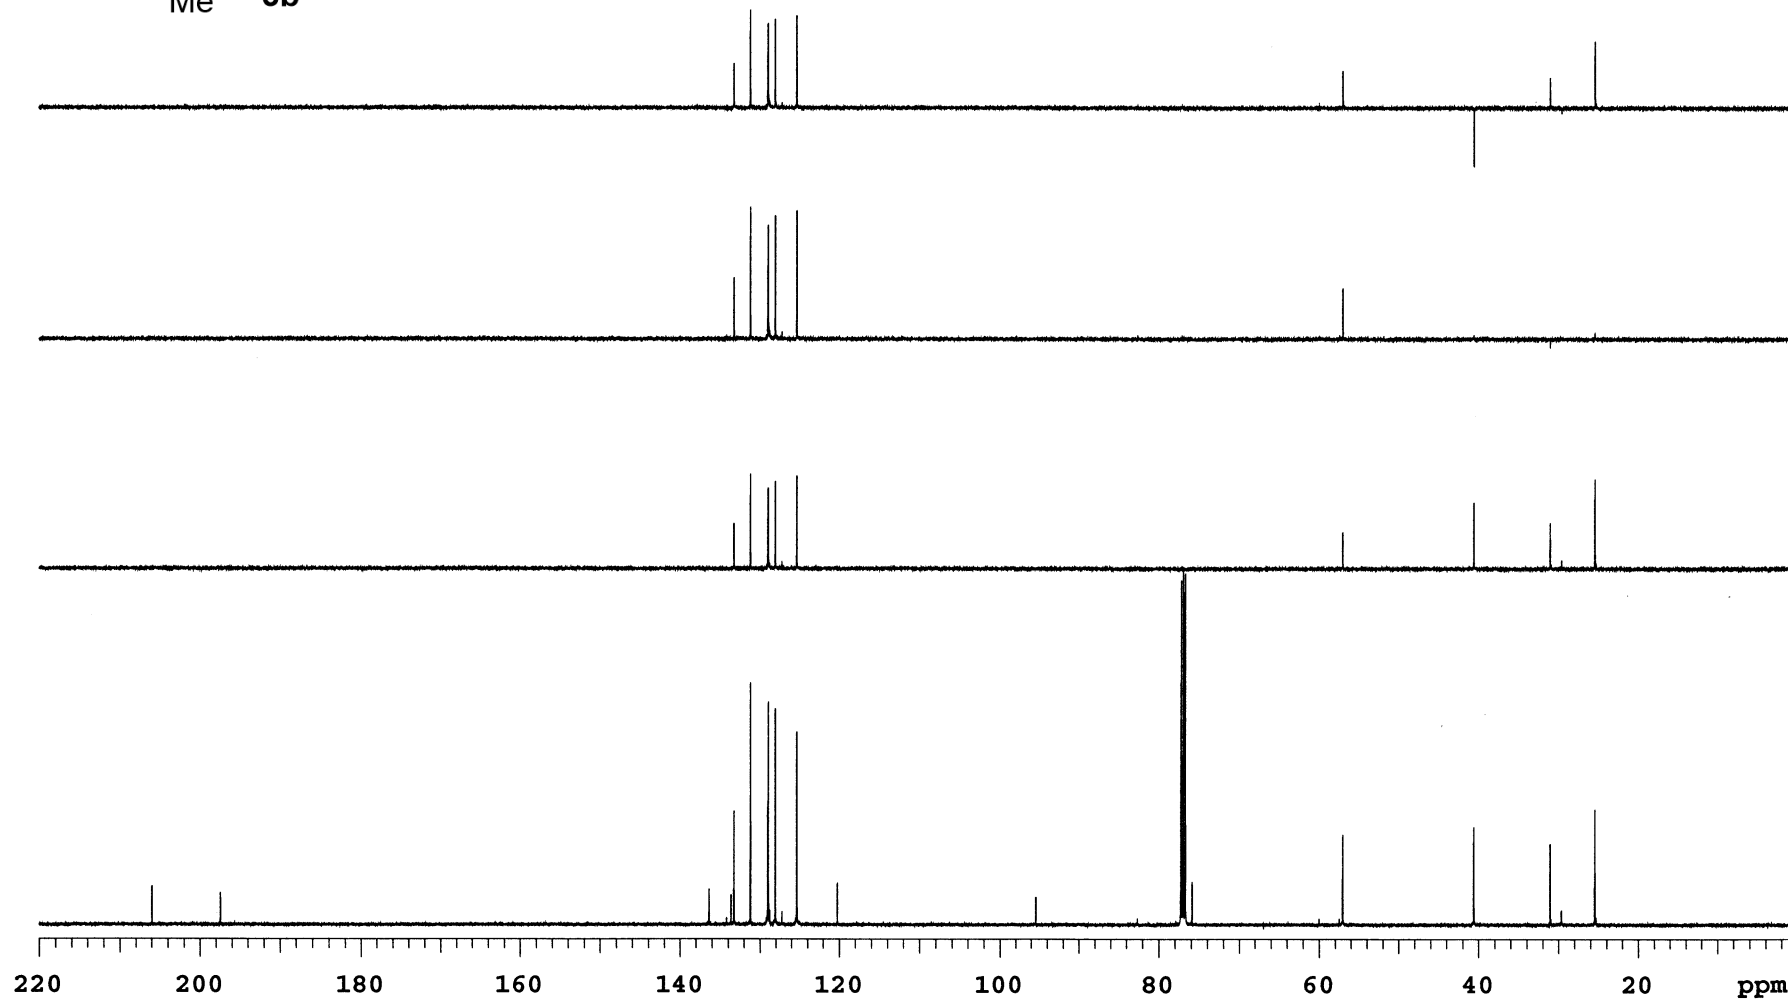

DEPT of compound 3b

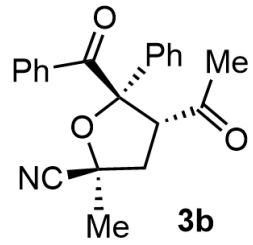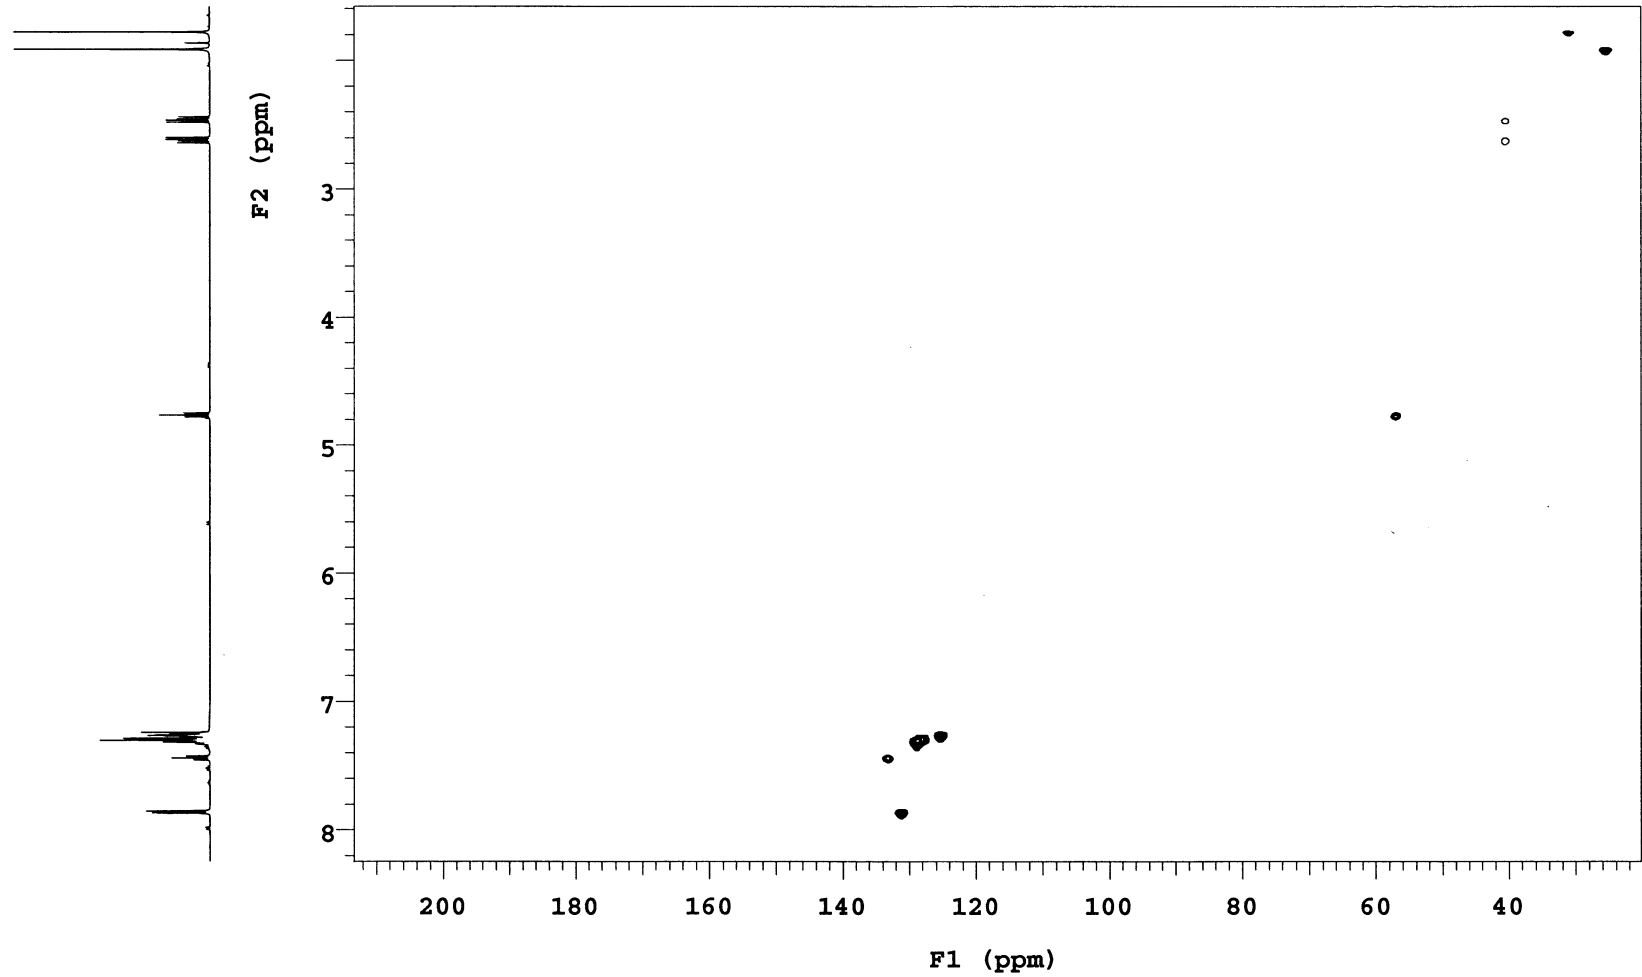

HSQC of compound 3b

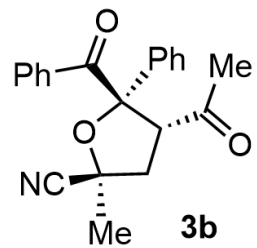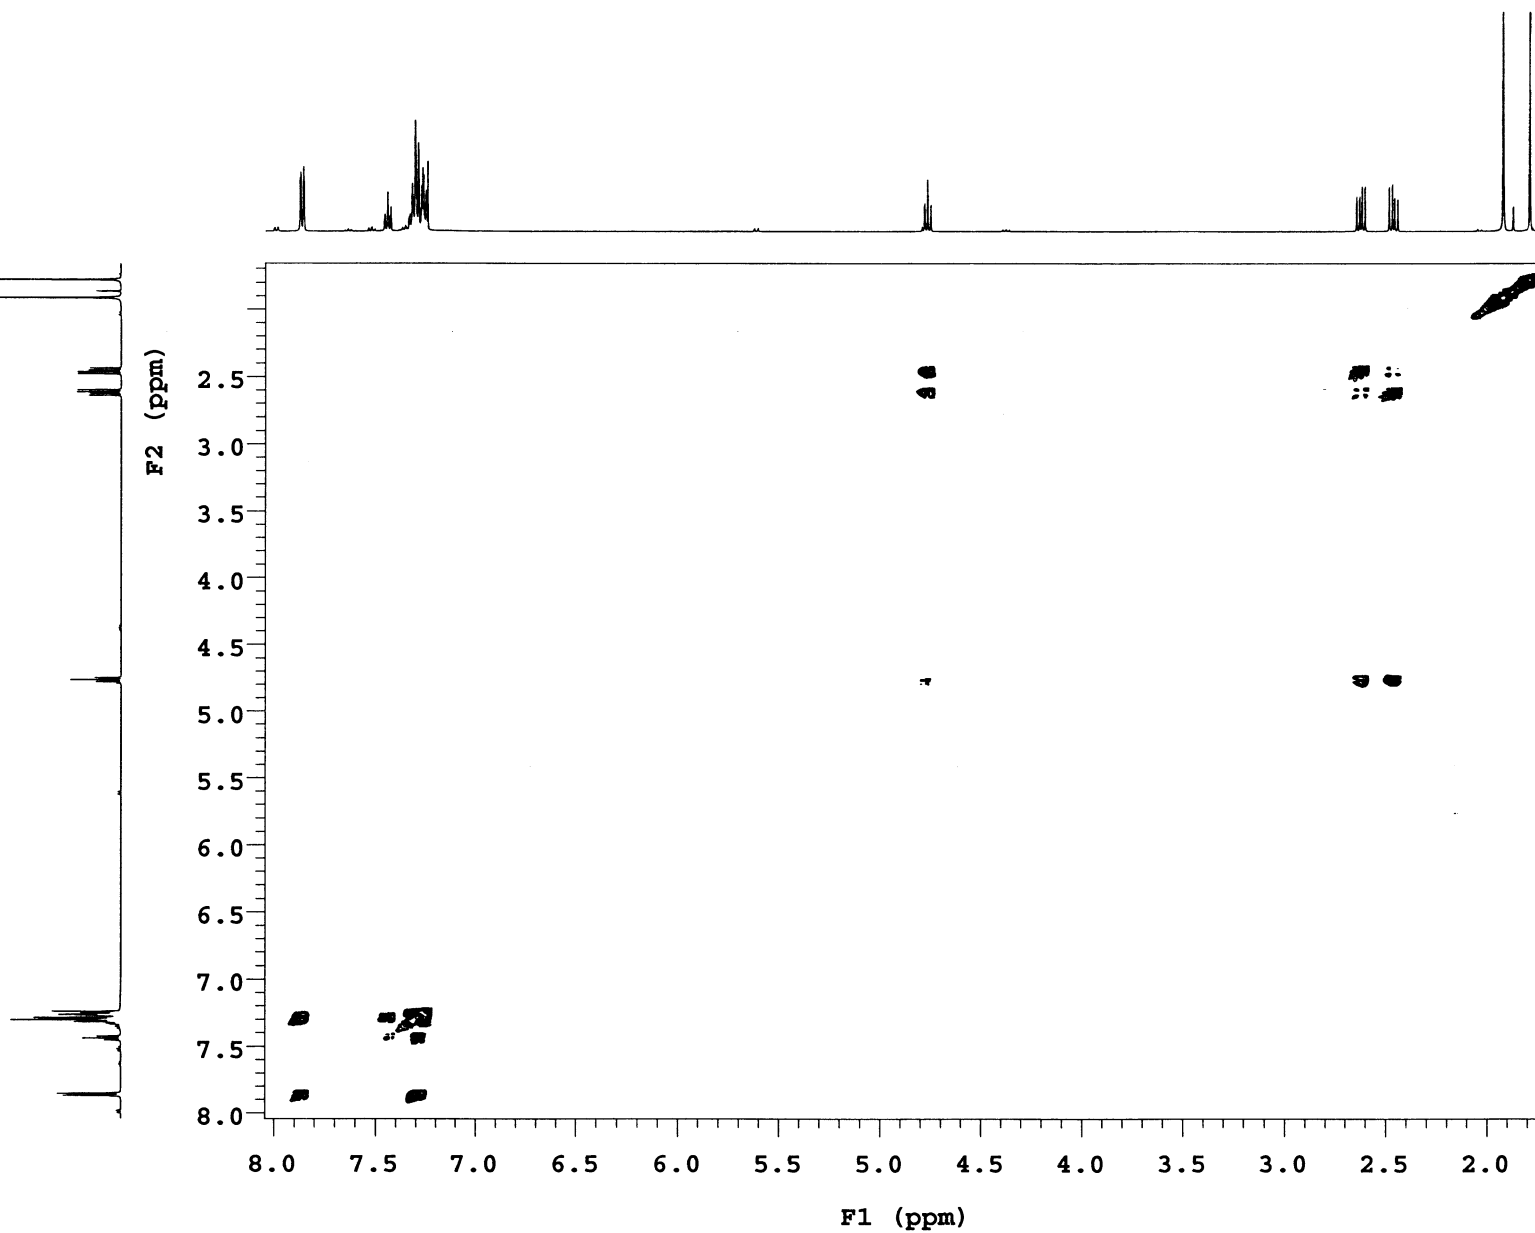

COSY of compound 3b

Sample Name IRR-03-109  
Date collected 2024-09-11Pulse sequence NOESY  
Solvent cdcl3Temperature 25  
Spectrometer Agilent-NMR-inova500Study owner vnmr2  
Operator vnmr2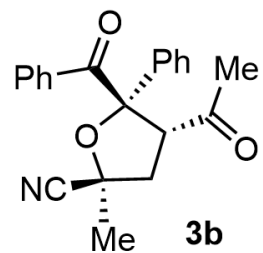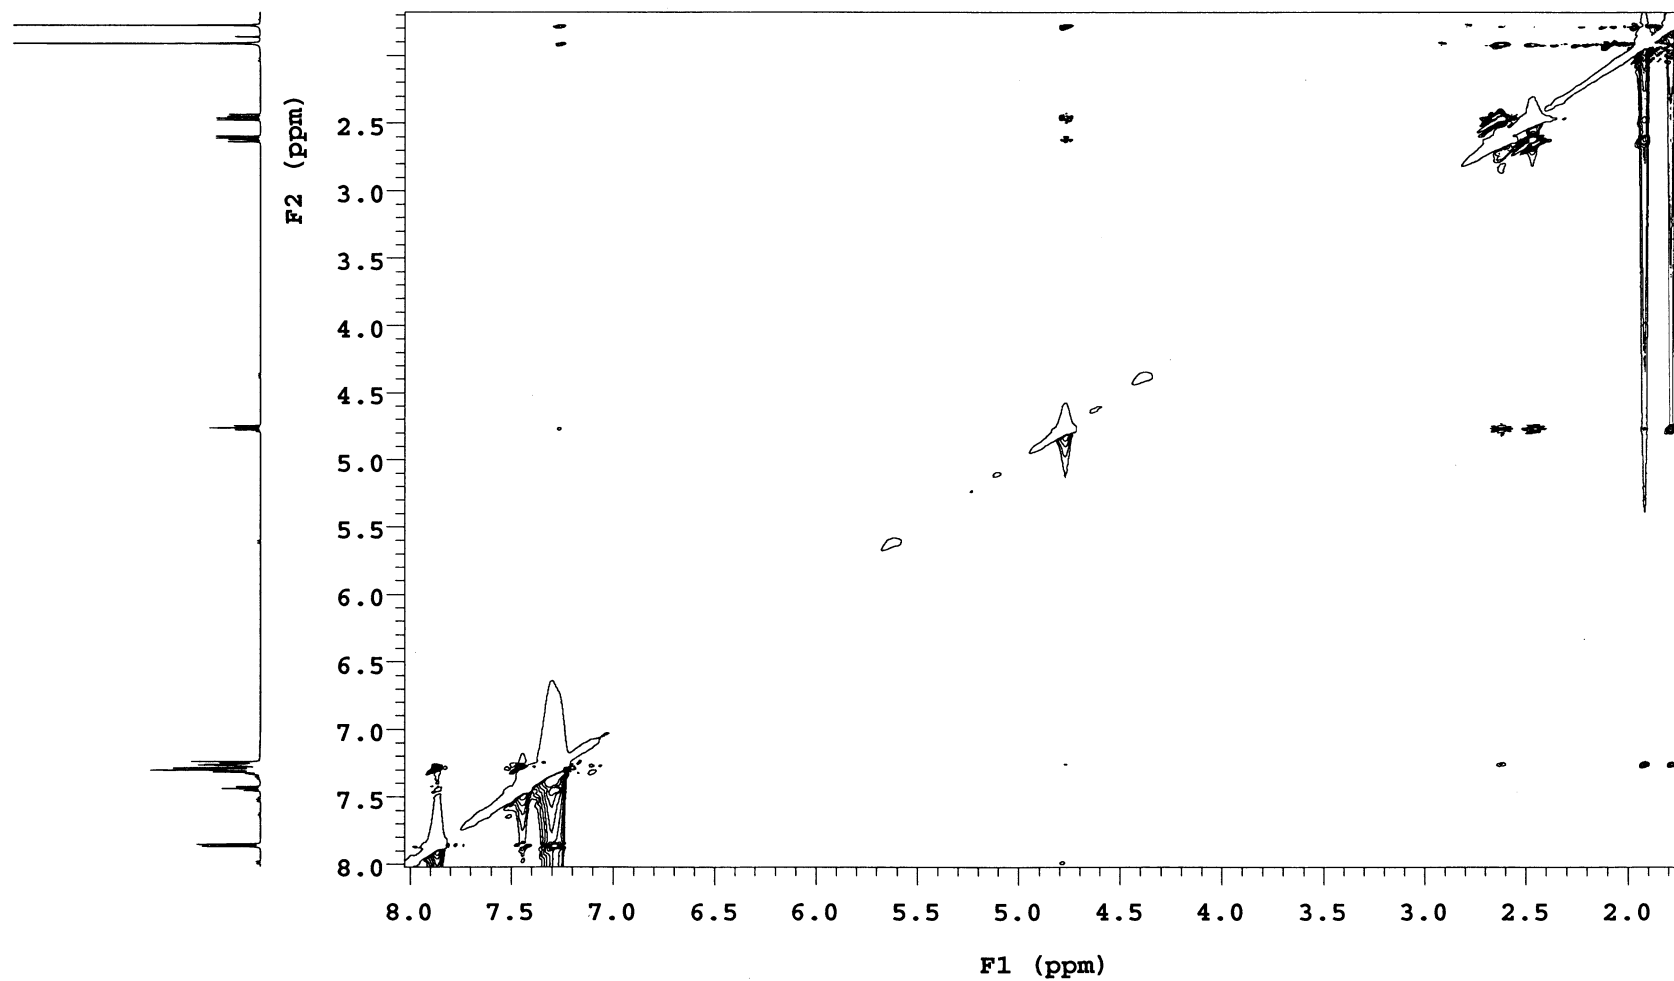

NOESY of compound 3b



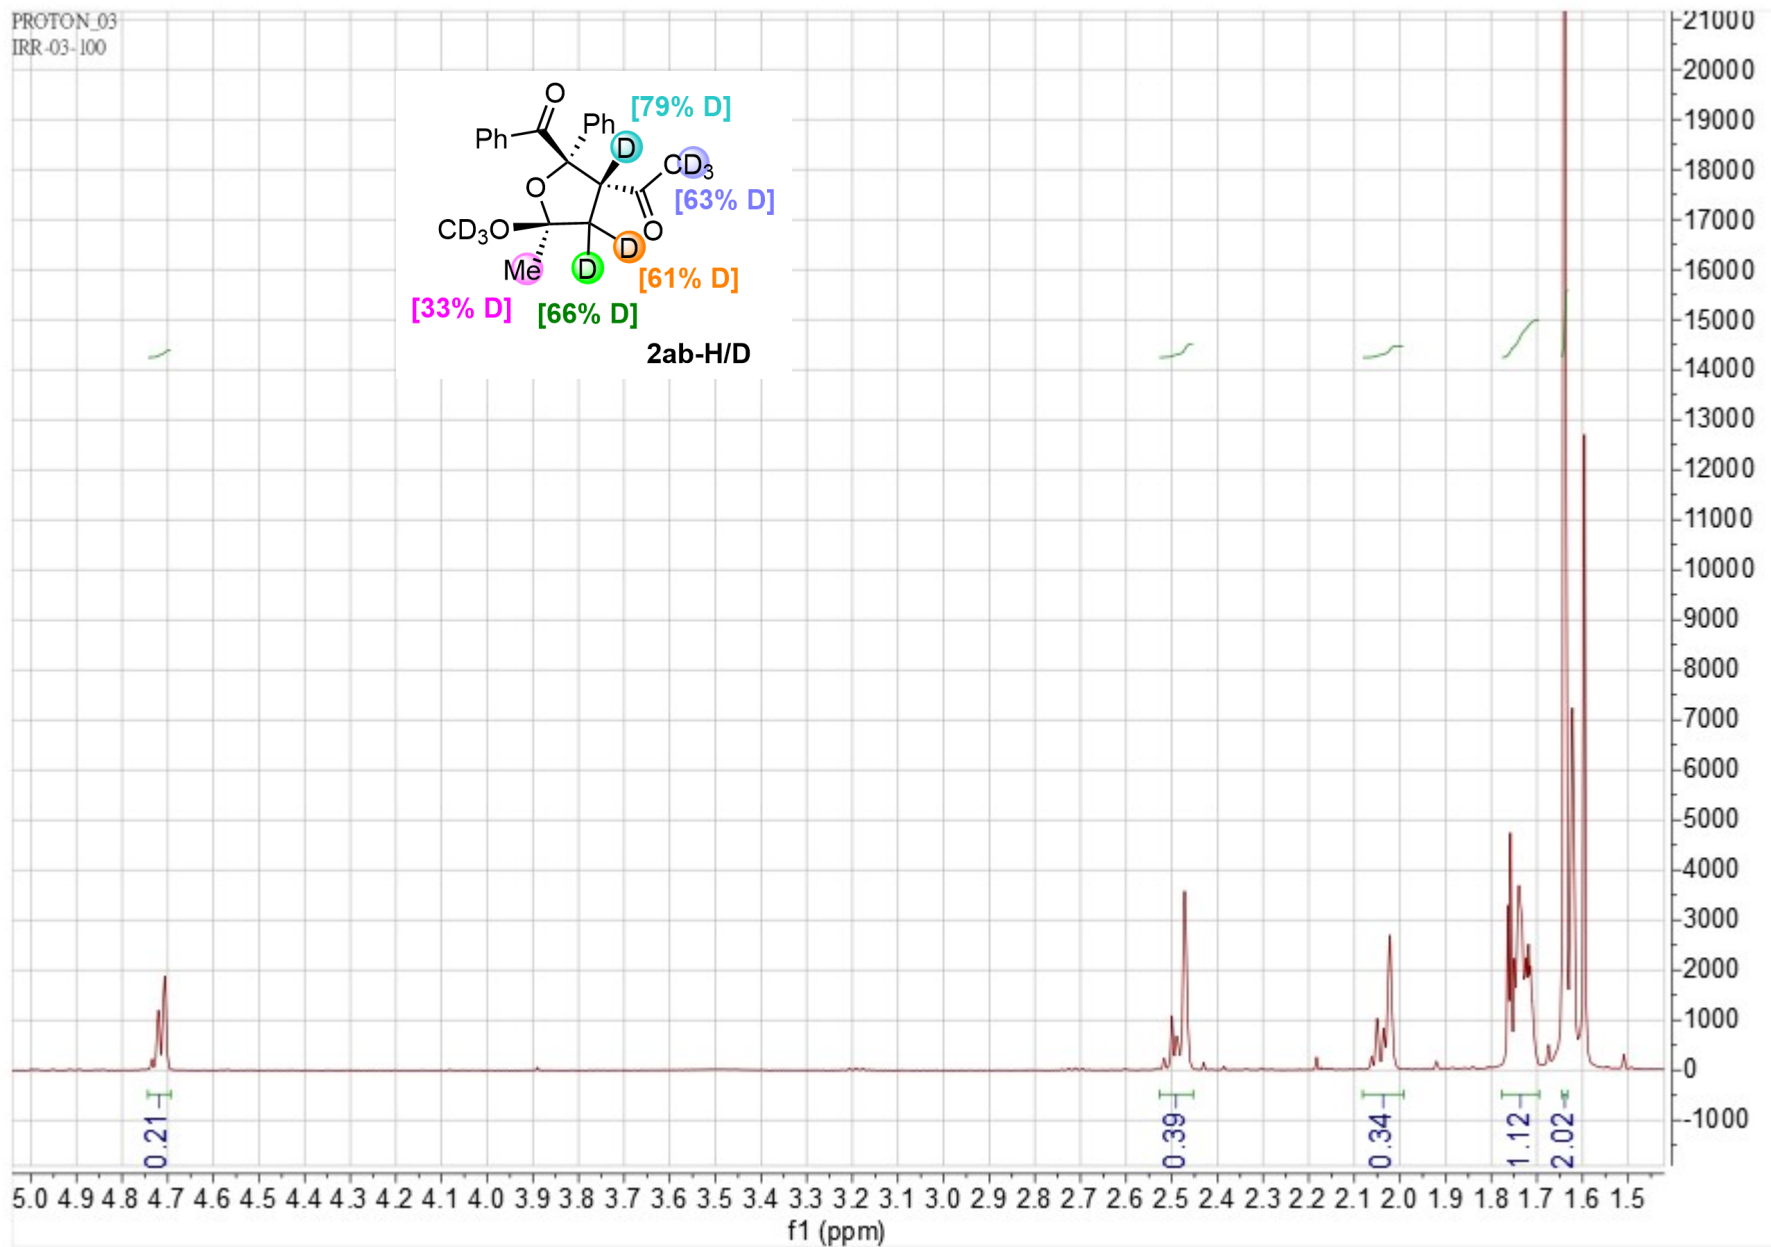Expansion of <sup>1</sup>H NMR of **2ab-H/D**

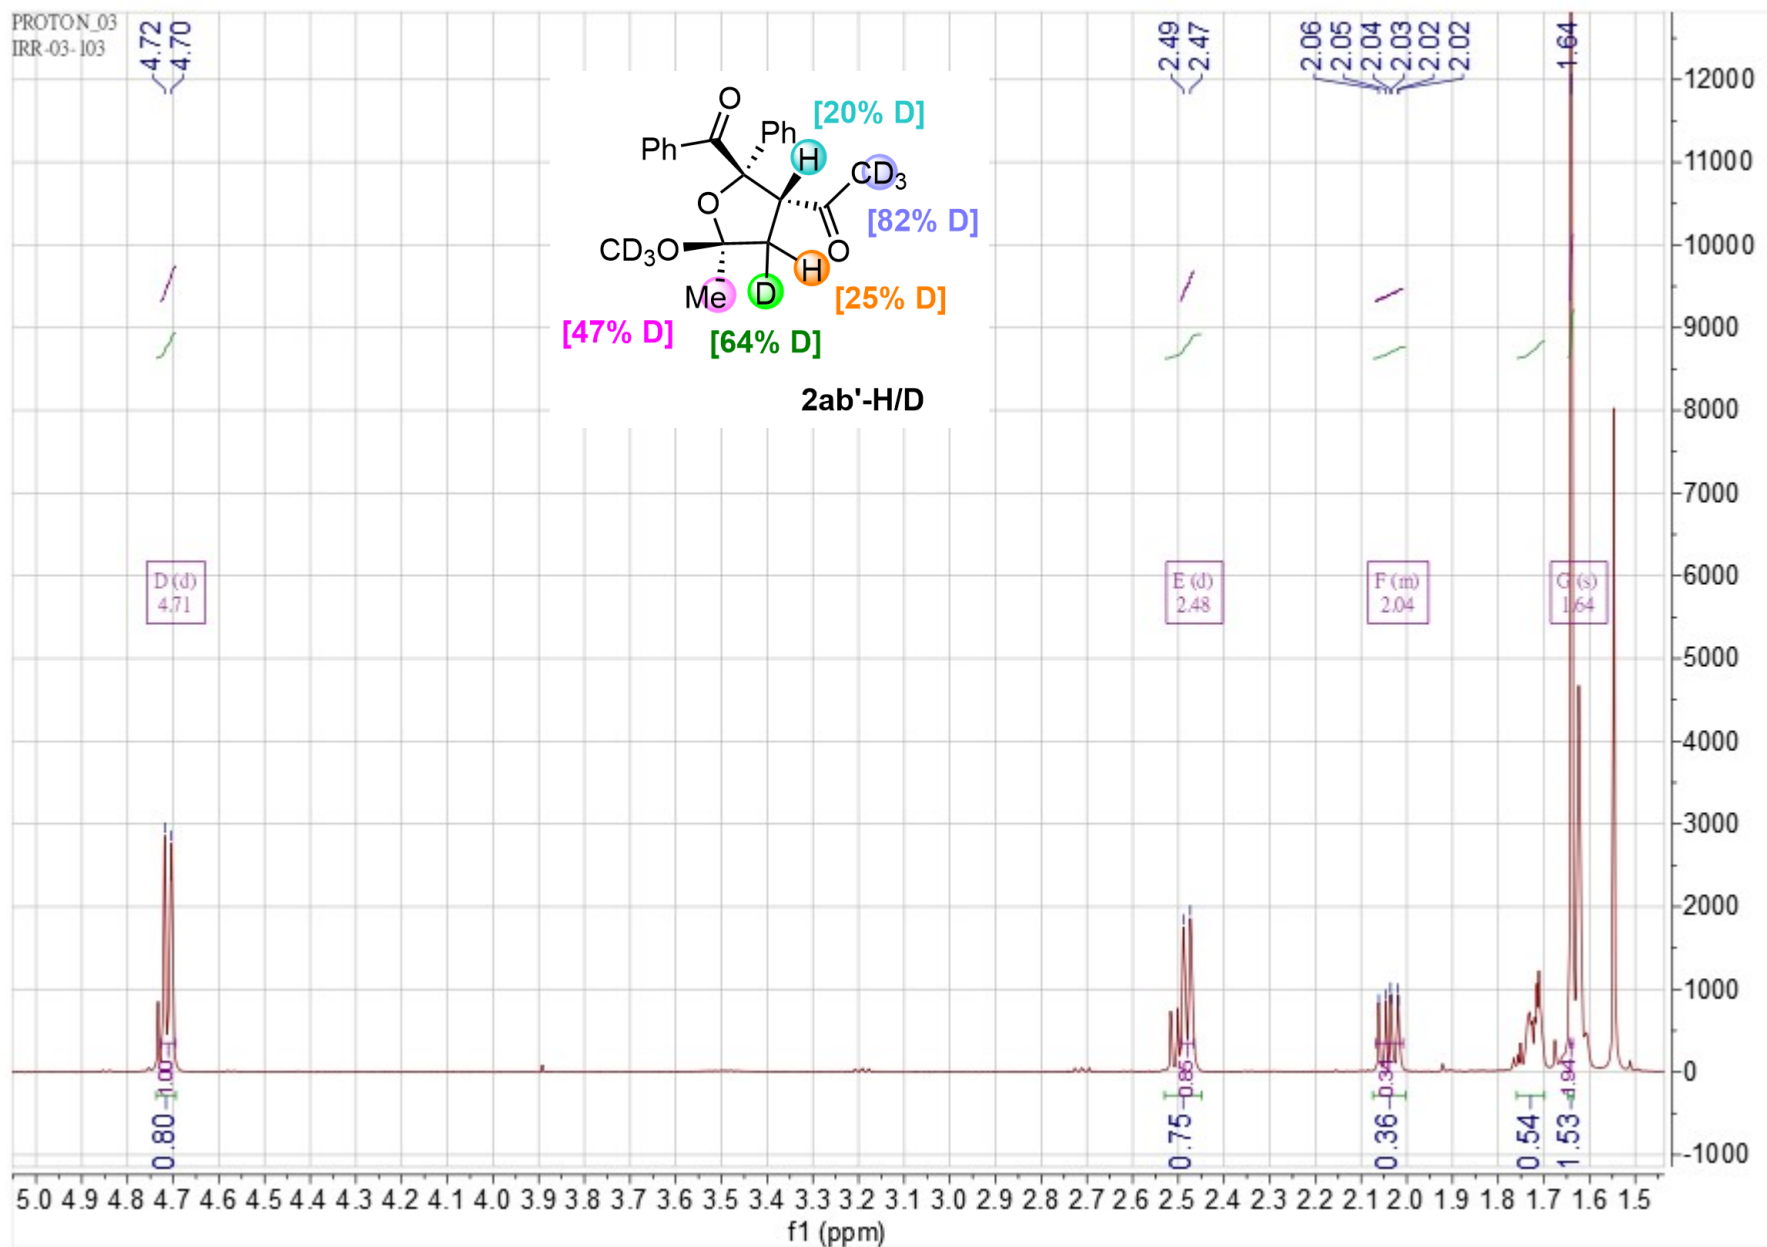Expansion of <sup>1</sup>H NMR of 2ab'-H/D
